# Supplementary material for: The temporal relationship between severe mental illness diagnosis and chronic physical comorbidity: a UK primary care cohort study of disease burden over 10 years
Source: PubMed Central journal article supplement (PMC9630158; doi:10.1016/s2215-0366(22)00225-5), 2022-09
Supplement: mmc1.pdf [file mmc1.pdf]

# THE LANCET Psychiatry

## Supplementary appendix

This appendix formed part of the original submission and has been peer reviewed. We post it as supplied by the authors.

Supplement to: Launders N, Kirsh L, Osborn DPJ, Hayes JF. The temporal relationship between severe mental illness diagnosis and chronic physical comorbidity: a UK primary care cohort study of disease burden over 10 years. *Lancet Psychiatry* 2022; published online July 21. [https://doi.org/10.1016/S2215-0366\(22\)00225-5](https://doi.org/10.1016/S2215-0366(22)00225-5).

**Supplement Table 1.** Count of physical health conditions in the 5 years before severe mental illness diagnosis, and the five years after

| <b>SMI</b>                    |                                              | Prevalence (% of active cohort) |       |       |       |       |                                             |       |       |       |       |
|-------------------------------|----------------------------------------------|---------------------------------|-------|-------|-------|-------|---------------------------------------------|-------|-------|-------|-------|
| Number of physical conditions | Years before severe mental illness diagnosis |                                 |       |       |       | Index | Years after severe mental illness diagnosis |       |       |       |       |
|                               | -5                                           | -4                              | -3    | -2    | -1    |       | +1                                          | +2    | +3    | +4    | +5    |
| 0                             | 69.03                                        | 67.12                           | 65.09 | 62.85 | 60.29 | 56.66 | 51.96                                       | 49.57 | 47.41 | 45.20 | 43.25 |
| 1                             | 21.47                                        | 22.18                           | 22.90 | 23.55 | 24.31 | 25.42 | 26.70                                       | 27.06 | 27.53 | 27.91 | 28.34 |
| 2                             | 5.95                                         | 6.55                            | 7.12  | 7.84  | 8.59  | 9.64  | 11.25                                       | 11.88 | 12.79 | 13.52 | 14.14 |
| 3                             | 2.15                                         | 2.44                            | 2.82  | 3.24  | 3.69  | 4.35  | 5.09                                        | 5.69  | 6.11  | 6.78  | 7.16  |
| 4                             | 0.83                                         | 0.98                            | 1.17  | 1.41  | 1.71  | 2.05  | 2.58                                        | 2.97  | 3.18  | 3.35  | 3.64  |
| 5                             | 0.38                                         | 0.44                            | 0.53  | 0.62  | 0.78  | 1.01  | 1.21                                        | 1.39  | 1.51  | 1.69  | 1.84  |
| 6                             | 0.13                                         | 0.18                            | 0.23  | 0.29  | 0.35  | 0.48  | 0.66                                        | 0.77  | 0.76  | 0.83  | 0.89  |
| 7                             | 0.05                                         | 0.07                            | 0.09  | 0.14  | 0.17  | 0.22  | 0.31                                        | 0.35  | 0.38  | 0.38  | 0.40  |
| 8                             | 0.01                                         | 0.02                            | 0.03  | 0.04  | 0.07  | 0.10  | 0.14                                        | 0.19  | 0.18  | 0.16  | 0.18  |
| 9                             | 0.01                                         | 0.01                            | 0.01  | 0.02  | 0.02  | 0.04  | 0.05                                        | 0.05  | 0.07  | 0.09  | 0.09  |
| 10                            | <0.01                                        | <0.01                           | 0.01  | 0.01  | 0.01  | 0.02  | 0.02                                        | 0.03  | 0.03  | 0.03  | 0.01  |
| 11                            |                                              | <0.01                           | <0.01 | <0.01 | <0.01 | 0.01  | 0.02                                        | 0.02  | 0.02  | 0.02  | 0.02  |
| 12                            |                                              |                                 | <0.01 | <0.01 | 0.01  | 0.01  | 0.01                                        | 0.01  | 0.01  | 0.02  | 0.03  |
| 13                            |                                              |                                 |       |       | <0.01 | <0.01 | <0.01                                       | <0.01 | <0.01 | <0.01 | <0.01 |
| 14                            |                                              |                                 |       |       |       | <0.01 | <0.01                                       | 0.01  | 0.01  | <0.01 | 0.01  |
| 15                            |                                              |                                 |       |       |       |       |                                             | <0.01 | <0.01 | <0.01 | <0.01 |
| >15                           |                                              |                                 |       |       |       |       | 0.01                                        | 0.01  | 0.01  |       | <0.01 |

  

| <b>Comparators</b>            |       | Prevalence (% of active cohort) |       |       |       |       |       |       |       |       |       |
|-------------------------------|-------|---------------------------------|-------|-------|-------|-------|-------|-------|-------|-------|-------|
| Number of physical conditions | -5    | -4                              | -3    | -2    | -1    | Index | +1    | +2    | +3    | +4    | +5    |
|                               | 0     | 71.50                           | 69.79 | 68.00 | 66.04 |       | 63.97 | 61.70 | 59.86 | 57.75 | 55.80 |
| 1                             | 19.81 | 20.47                           | 21.08 | 21.79 | 22.45 | 23.17 | 23.52 | 24.11 | 24.54 | 24.80 | 24.98 |
| 2                             | 5.41  | 5.87                            | 6.40  | 6.91  | 7.47  | 8.04  | 8.54  | 9.16  | 9.78  | 10.37 | 10.86 |
| 3                             | 2.01  | 2.30                            | 2.58  | 2.92  | 3.26  | 3.66  | 4.04  | 4.48  | 4.86  | 5.25  | 5.56  |
| 4                             | 0.78  | 0.95                            | 1.12  | 1.30  | 1.54  | 1.78  | 2.02  | 2.26  | 2.48  | 2.73  | 2.99  |
| 5                             | 0.32  | 0.40                            | 0.50  | 0.63  | 0.73  | 0.90  | 1.07  | 1.15  | 1.31  | 1.44  | 1.55  |
| 6                             | 0.11  | 0.15                            | 0.20  | 0.25  | 0.34  | 0.43  | 0.53  | 0.62  | 0.68  | 0.74  | 0.77  |
| 7                             | 0.04  | 0.06                            | 0.08  | 0.10  | 0.12  | 0.17  | 0.24  | 0.27  | 0.32  | 0.36  | 0.40  |
| 8                             | 0.01  | 0.02                            | 0.03  | 0.04  | 0.07  | 0.08  | 0.11  | 0.13  | 0.14  | 0.17  | 0.20  |
| 9                             | <0.01 | 0.01                            | 0.01  | 0.01  | 0.02  | 0.03  | 0.04  | 0.05  | 0.05  | 0.06  | 0.08  |
| 10                            | <0.01 | <0.01                           | <0.01 | 0.01  | 0.01  | 0.01  | 0.02  | 0.02  | 0.03  | 0.03  | 0.03  |
| 11                            |       | <0.01                           | <0.01 | <0.01 | <0.01 | <0.01 | 0.01  | 0.01  | 0.01  | 0.01  | 0.01  |
| 12                            |       |                                 |       | <0.01 | <0.01 | <0.01 | <0.01 | <0.01 | <0.01 | <0.01 | <0.01 |
| 13                            |       |                                 |       |       |       |       |       |       | <0.01 | <0.01 | <0.01 |
| 14                            |       |                                 |       |       |       | <0.01 | <0.01 | <0.01 | <0.01 |       |       |
| 15                            |       |                                 |       |       |       |       |       |       |       |       | <0.01 |
| >15                           |       |                                 |       |       |       |       |       |       |       |       |       |

**Supplement Table 2.** Adjusted\* odds ratios (with 95% CI based on sandwich standard errors) for physical health diagnoses in people with severe mental illness compared to matched comparators

|                                 | Adjusted odds ratios (95% confidence interval) |                  |                  |                  |                                             |                  |                  |
|---------------------------------|------------------------------------------------|------------------|------------------|------------------|---------------------------------------------|------------------|------------------|
|                                 | Years before severe mental illness diagnosis   |                  |                  | Index            | Years after severe mental illness diagnosis |                  |                  |
|                                 | -5                                             | -3               | -1               |                  | +1                                          | +3               | +5               |
| <b>COPD</b>                     |                                                |                  |                  |                  |                                             |                  |                  |
| All SMI                         | 1.17 (1.07-1.28)                               | 1.23 (1.14-1.33) | 1.28 (1.20-1.37) | 1.31 (1.24-1.40) | 1.42 (1.34-1.50)                            | 1.50 (1.42-1.59) | 1.60 (1.50-1.70) |
| Schizophrenia                   | 1.09 (0.88-1.34)                               | 1.22 (1.03-1.45) | 1.29 (1.11-1.50) | 1.32 (1.16-1.51) | 1.57 (1.40-1.75)                            | 1.56 (1.40-1.75) | 1.66 (1.46-1.89) |
| Bipolar disorder                | 1.23 (1.06-1.43)                               | 1.33 (1.17-1.51) | 1.47 (1.33-1.63) | 1.55 (1.41-1.70) | 1.69 (1.55-1.84)                            | 1.74 (1.60-1.89) | 1.86 (1.70-2.03) |
| Other                           | 1.17 (1.04-1.31)                               | 1.19 (1.08-1.32) | 1.18 (1.08-1.29) | 1.18 (1.09-1.29) | 1.23 (1.13-1.33)                            | 1.33 (1.22-1.44) | 1.35 (1.23-1.49) |
| <b>Asthma</b>                   |                                                |                  |                  |                  |                                             |                  |                  |
| All SMI                         | 1.16 (1.13-1.20)                               | 1.17 (1.14-1.20) | 1.18 (1.15-1.21) | 1.20 (1.17-1.23) | 1.24 (1.21-1.27)                            | 1.26 (1.22-1.29) | 1.29 (1.25-1.33) |
| Schizophrenia                   | 0.97 (0.91-1.03)                               | 0.95 (0.90-1.01) | 0.94 (0.89-0.99) | 0.96 (0.91-1.02) | 1.03 (0.98-1.08)                            | 1.06 (1.00-1.11) | 1.10 (1.04-1.17) |
| Bipolar disorder                | 1.27 (1.22-1.32)                               | 1.28 (1.23-1.33) | 1.30 (1.25-1.35) | 1.33 (1.28-1.37) | 1.39 (1.34-1.43)                            | 1.40 (1.35-1.45) | 1.44 (1.37-1.50) |
| Other                           | 1.17 (1.13-1.22)                               | 1.18 (1.14-1.22) | 1.19 (1.15-1.23) | 1.20 (1.16-1.25) | 1.22 (1.18-1.27)                            | 1.24 (1.19-1.29) | 1.25 (1.20-1.31) |
| <b>Cardiac Arrhythmia</b>       |                                                |                  |                  |                  |                                             |                  |                  |
| All SMI                         | 0.98 (0.91-1.06)                               | 0.96 (0.90-1.03) | 0.99 (0.93-1.06) | 1.05 (0.99-1.11) | 1.12 (1.06-1.18)                            | 1.10 (1.04-1.16) | 1.03 (0.97-1.10) |
| Schizophrenia                   | 0.69 (0.56-0.85)                               | 0.68 (0.56-0.83) | 0.73 (0.62-0.86) | 0.76 (0.66-0.88) | 0.87 (0.76-0.99)                            | 0.86 (0.75-0.99) | 0.83 (0.72-0.97) |
| Bipolar disorder                | 0.94 (0.82-1.08)                               | 0.94 (0.84-1.06) | 1.00 (0.91-1.11) | 1.06 (0.96-1.17) | 1.13 (1.03-1.23)                            | 1.14 (1.04-1.24) | 1.06 (0.96-1.17) |
| Other                           | 1.08 (0.98-1.18)                               | 1.05 (0.97-1.14) | 1.06 (0.99-1.15) | 1.12 (1.05-1.20) | 1.18 (1.11-1.26)                            | 1.16 (1.08-1.24) | 1.09 (1.00-1.19) |
| <b>Congestive Heart Failure</b> |                                                |                  |                  |                  |                                             |                  |                  |
| All SMI                         | 0.93 (0.82-1.05)                               | 0.95 (0.86-1.06) | 0.99 (0.90-1.08) | 1.05 (0.97-1.14) | 1.12 (1.04-1.21)                            | 1.18 (1.08-1.27) | 1.25 (1.13-1.38) |
| Schizophrenia                   | 0.62 (0.43-0.88)                               | 0.70 (0.52-0.95) | 0.76 (0.60-0.97) | 0.82 (0.67-1.02) | 0.99 (0.82-1.18)                            | 1.02 (0.84-1.22) | 1.08 (0.87-1.34) |
| Bipolar disorder                | 0.80 (0.63-1.03)                               | 0.85 (0.69-1.03) | 0.97 (0.82-1.14) | 1.10 (0.95-1.27) | 1.21 (1.06-1.39)                            | 1.30 (1.14-1.48) | 1.37 (1.19-1.59) |
| Other                           | 1.05 (0.91-1.22)                               | 1.05 (0.93-1.20) | 1.05 (0.94-1.16) | 1.09 (0.98-1.20) | 1.12 (1.02-1.22)                            | 1.16 (1.05-1.29) | 1.22 (1.07-1.40) |
| <b>MI</b>                       |                                                |                  |                  |                  |                                             |                  |                  |
| All SMI                         | 0.85 (0.78-0.94)                               | 0.88 (0.80-0.96) | 0.93 (0.86-1.00) | 0.96 (0.90-1.04) | 1.00 (0.93-1.08)                            | 1.03 (0.95-1.12) | 1.04 (0.95-1.14) |
| Schizophrenia                   | 0.58 (0.45-0.75)                               | 0.63 (0.50-0.79) | 0.68 (0.56-0.83) | 0.75 (0.62-0.89) | 0.83 (0.70-0.98)                            | 0.97 (0.82-1.15) | 1.10 (0.92-1.33) |
| Bipolar disorder                | 0.81 (0.68-0.97)                               | 0.83 (0.71-0.97) | 0.88 (0.77-1.02) | 0.91 (0.80-1.04) | 0.98 (0.87-1.12)                            | 1.02 (0.89-1.16) | 0.98 (0.85-1.14) |
| Other                           | 0.95 (0.85-1.07)                               | 0.97 (0.88-1.08) | 1.02 (0.93-1.13) | 1.06 (0.96-1.16) | 1.07 (0.97-1.17)                            | 1.06 (0.95-1.17) | 1.06 (0.93-1.21) |
| <b>Cerebrovascular Disease</b>  |                                                |                  |                  |                  |                                             |                  |                  |
| All SMI                         | 1.15 (1.06-1.24)                               | 1.17 (1.09-1.25) | 1.23 (1.16-1.31) | 1.36 (1.29-1.44) | 1.47 (1.40-1.55)                            | 1.59 (1.51-1.68) | 1.70 (1.60-1.81) |
| Schizophrenia                   | 0.90 (0.75-1.09)                               | 0.91 (0.77-1.07) | 0.92 (0.80-1.07) | 0.98 (0.86-1.12) | 1.15 (1.02-1.30)                            | 1.23 (1.08-1.39) | 1.39 (1.21-1.59) |
| Bipolar disorder                | 1.08 (0.95-1.24)                               | 1.14 (1.02-1.28) | 1.33 (1.21-1.46) | 1.48 (1.36-1.61) | 1.64 (1.51-1.78)                            | 1.81 (1.67-1.97) | 1.81 (1.65-1.98) |
| Other                           | 1.24 (1.13-1.36)                               | 1.26 (1.16-1.36) | 1.28 (1.18-1.37) | 1.42 (1.33-1.52) | 1.49 (1.39-1.59)                            | 1.58 (1.47-1.70) | 1.74 (1.60-1.90) |
| <b>Neurological Disease</b>     |                                                |                  |                  |                  |                                             |                  |                  |
| All SMI                         | 2.15 (2.05-2.26)                               | 2.21 (2.11-2.32) | 2.26 (2.16-2.36) | 2.40 (2.30-2.51) | 2.71 (2.60-2.82)                            | 2.92 (2.79-3.05) | 3.04 (2.89-3.21) |
| Schizophrenia                   | 1.87 (1.68-2.08)                               | 1.96 (1.77-2.16) | 1.97 (1.79-2.16) | 2.12 (1.94-2.32) | 2.57 (2.37-2.79)                            | 2.78 (2.56-3.02) | 2.89 (2.63-3.16) |
| Bipolar disorder                | 1.70 (1.57-1.84)                               | 1.74 (1.61-1.88) | 1.86 (1.73-2.00) | 1.99 (1.85-2.13) | 2.26 (2.12-2.41)                            | 2.44 (2.28-2.61) | 2.58 (2.39-2.79) |
| Other                           | 2.64 (2.49-2.81)                               | 2.71 (2.55-2.88) | 2.71 (2.56-2.87) | 2.86 (2.71-3.02) | 3.13 (2.97-3.30)                            | 3.41 (3.23-3.61) | 3.60 (3.36-3.86) |
| <b>Cancer</b>                   |                                                |                  |                  |                  |                                             |                  |                  |
| All SMI                         | 0.90 (0.85-0.95)                               | 0.88 (0.84-0.93) | 0.89 (0.85-0.93) | 0.91 (0.87-0.95) | 0.92 (0.89-0.96)                            | 0.95 (0.91-0.99) | 0.95 (0.90-1.00) |
| Schizophrenia                   | 0.62 (0.53-0.72)                               | 0.62 (0.54-0.71) | 0.62 (0.54-0.70) | 0.65 (0.58-0.73) | 0.73 (0.66-0.81)                            | 0.74 (0.66-0.82) | 0.78 (0.69-0.88) |
| Bipolar disorder                | 1.06 (0.96-1.16)                               | 1.04 (0.95-1.12) | 1.06 (0.98-1.14) | 1.05 (0.98-1.13) | 1.08 (1.01-1.15)                            | 1.10 (1.03-1.18) | 1.10 (1.03-1.18) |
| Other                           | 0.90 (0.84-0.97)                               | 0.88 (0.82-0.94) | 0.88 (0.82-0.94) | 0.90 (0.85-0.96) | 0.90 (0.84-0.95)                            | 0.91 (0.86-0.97) | 0.89 (0.83-0.96) |

## Adjusted odds ratios (95% confidence interval)

|                             | Years before severe mental illness diagnosis |                  |                  |                  | Years after severe mental illness diagnosis |                  |                  |
|-----------------------------|----------------------------------------------|------------------|------------------|------------------|---------------------------------------------|------------------|------------------|
|                             | -5                                           | -3               | -1               | Index            | +1                                          | +3               | +5               |
| <b>Diabetes</b>             |                                              |                  |                  |                  |                                             |                  |                  |
| All SMI                     | 1.10 (1.05-1.16)                             | 1.12 (1.07-1.17) | 1.18 (1.14-1.23) | 1.28 (1.24-1.33) | 1.51 (1.46-1.56)                            | 1.66 (1.60-1.72) | 1.86 (1.79-1.93) |
| Schizophrenia               | 0.95 (0.85-1.07)                             | 1.03 (0.93-1.14) | 1.11 (1.02-1.22) | 1.27 (1.18-1.38) | 1.70 (1.59-1.82)                            | 1.84 (1.73-1.97) | 2.10 (1.96-2.26) |
| Bipolar disorder            | 1.27 (1.18-1.38)                             | 1.31 (1.22-1.40) | 1.41 (1.33-1.49) | 1.50 (1.42-1.58) | 1.72 (1.63-1.81)                            | 1.87 (1.78-1.97) | 2.04 (1.93-2.15) |
| Other                       | 1.06 (0.99-1.13)                             | 1.05 (0.99-1.11) | 1.07 (1.02-1.13) | 1.15 (1.09-1.21) | 1.30 (1.24-1.37)                            | 1.43 (1.35-1.50) | 1.58 (1.49-1.67) |
| <b>Hypothyroid</b>          |                                              |                  |                  |                  |                                             |                  |                  |
| All SMI                     | 1.23 (1.15-1.30)                             | 1.23 (1.17-1.30) | 1.29 (1.23-1.35) | 1.36 (1.30-1.43) | 1.59 (1.53-1.66)                            | 1.73 (1.65-1.81) | 1.91 (1.82-2.01) |
| Schizophrenia               | 1.03 (0.89-1.20)                             | 1.01 (0.88-1.15) | 1.03 (0.91-1.16) | 1.09 (0.97-1.22) | 1.33 (1.21-1.47)                            | 1.37 (1.24-1.51) | 1.41 (1.26-1.58) |
| Bipolar disorder            | 1.53 (1.40-1.67)                             | 1.58 (1.47-1.71) | 1.66 (1.55-1.78) | 1.75 (1.64-1.87) | 2.17 (2.05-2.30)                            | 2.42 (2.28-2.56) | 2.68 (2.52-2.85) |
| Other                       | 1.09 (1.01-1.19)                             | 1.07 (1.00-1.16) | 1.12 (1.04-1.20) | 1.18 (1.11-1.26) | 1.28 (1.20-1.36)                            | 1.32 (1.24-1.41) | 1.41 (1.31-1.52) |
| <b>Liver Disease</b>        |                                              |                  |                  |                  |                                             |                  |                  |
| All SMI                     | 1.45 (1.32-1.59)                             | 1.49 (1.37-1.63) | 1.60 (1.47-1.74) | 1.65 (1.52-1.78) | 1.79 (1.67-1.93)                            | 1.88 (1.74-2.03) | 1.77 (1.62-1.93) |
| Schizophrenia               | 1.32 (1.11-1.58)                             | 1.35 (1.14-1.59) | 1.49 (1.28-1.73) | 1.58 (1.38-1.81) | 1.84 (1.62-2.08)                            | 1.94 (1.70-2.22) | 1.80 (1.55-2.10) |
| Bipolar disorder            | 1.44 (1.26-1.65)                             | 1.43 (1.26-1.62) | 1.43 (1.27-1.60) | 1.43 (1.28-1.59) | 1.55 (1.40-1.72)                            | 1.67 (1.50-1.86) | 1.56 (1.37-1.78) |
| Other                       | 1.51 (1.33-1.71)                             | 1.61 (1.43-1.81) | 1.78 (1.59-1.98) | 1.85 (1.67-2.05) | 1.95 (1.77-2.15)                            | 2.02 (1.82-2.25) | 1.93 (1.72-2.17) |
| <b>Renal Disease</b>        |                                              |                  |                  |                  |                                             |                  |                  |
| All SMI                     | 0.96 (0.88-1.04)                             | 0.95 (0.89-1.02) | 0.98 (0.92-1.03) | 1.02 (0.96-1.08) | 1.12 (1.06-1.17)                            | 1.23 (1.17-1.29) | 1.42 (1.35-1.50) |
| Schizophrenia               | 0.71 (0.56-0.88)                             | 0.79 (0.66-0.94) | 0.81 (0.69-0.94) | 0.83 (0.72-0.96) | 1.00 (0.89-1.13)                            | 1.16 (1.04-1.30) | 1.37 (1.22-1.53) |
| Bipolar disorder            | 0.85 (0.72-0.99)                             | 0.88 (0.77-1.00) | 0.98 (0.88-1.09) | 1.12 (1.02-1.23) | 1.28 (1.18-1.40)                            | 1.46 (1.36-1.58) | 1.65 (1.53-1.78) |
| Other                       | 1.08 (0.98-1.19)                             | 1.03 (0.95-1.12) | 1.02 (0.95-1.09) | 1.02 (0.95-1.09) | 1.07 (1.00-1.14)                            | 1.11 (1.04-1.19) | 1.26 (1.17-1.35) |
| <b>Peptic Ulcer</b>         |                                              |                  |                  |                  |                                             |                  |                  |
| All SMI                     | 1.09 (1.01-1.17)                             | 1.08 (1.01-1.16) | 1.14 (1.06-1.22) | 1.16 (1.09-1.24) | 1.21 (1.14-1.29)                            | 1.20 (1.12-1.28) | 1.21 (1.11-1.31) |
| Schizophrenia               | 0.72 (0.60-0.86)                             | 0.72 (0.61-0.85) | 0.72 (0.61-0.85) | 0.74 (0.64-0.86) | 0.79 (0.68-0.92)                            | 0.79 (0.68-0.92) | 0.83 (0.69-0.99) |
| Bipolar disorder            | 1.16 (1.04-1.31)                             | 1.15 (1.03-1.29) | 1.23 (1.11-1.37) | 1.27 (1.15-1.41) | 1.32 (1.20-1.45)                            | 1.30 (1.17-1.44) | 1.31 (1.17-1.47) |
| Other                       | 1.19 (1.08-1.31)                             | 1.19 (1.08-1.30) | 1.24 (1.14-1.36) | 1.27 (1.16-1.38) | 1.31 (1.21-1.43)                            | 1.31 (1.20-1.43) | 1.32 (1.18-1.46) |
| <b>Rheumatic Disease</b>    |                                              |                  |                  |                  |                                             |                  |                  |
| All SMI                     | 1.02 (0.94-1.10)                             | 1.02 (0.95-1.09) | 1.01 (0.94-1.07) | 1.03 (0.97-1.10) | 1.05 (0.98-1.11)                            | 1.00 (0.94-1.07) | 0.99 (0.92-1.07) |
| Schizophrenia               | 0.71 (0.57-0.87)                             | 0.66 (0.55-0.80) | 0.66 (0.55-0.79) | 0.70 (0.60-0.83) | 0.75 (0.65-0.88)                            | 0.73 (0.62-0.85) | 0.76 (0.63-0.90) |
| Bipolar disorder            | 1.09 (0.96-1.24)                             | 1.07 (0.95-1.20) | 1.07 (0.97-1.19) | 1.11 (1.00-1.22) | 1.13 (1.03-1.25)                            | 1.10 (0.99-1.21) | 1.11 (0.99-1.24) |
| Other                       | 1.07 (0.97-1.18)                             | 1.10 (1.00-1.21) | 1.08 (0.99-1.18) | 1.09 (1.01-1.19) | 1.09 (1.00-1.18)                            | 1.04 (0.95-1.14) | 0.99 (0.89-1.10) |
| <b>Paralysis or paresis</b> |                                              |                  |                  |                  |                                             |                  |                  |
| All SMI                     | 1.94 (1.70-2.21)                             | 1.88 (1.65-2.13) | 1.87 (1.66-2.12) | 1.94 (1.73-2.18) | 2.00 (1.78-2.23)                            | 2.05 (1.82-2.31) | 1.95 (1.69-2.25) |
| Schizophrenia               | 1.41 (1.06-1.86)                             | 1.36 (1.04-1.79) | 1.40 (1.09-1.80) | 1.44 (1.13-1.84) | 1.49 (1.18-1.88)                            | 1.44 (1.13-1.85) | 1.41 (1.05-1.89) |
| Bipolar disorder            | 1.93 (1.60-2.33)                             | 1.91 (1.59-2.28) | 1.87 (1.57-2.23) | 1.90 (1.61-2.25) | 1.97 (1.67-2.32)                            | 2.07 (1.74-2.45) | 1.92 (1.58-2.33) |
| Other                       | 2.19 (1.85-2.60)                             | 2.09 (1.76-2.47) | 2.10 (1.78-2.47) | 2.21 (1.89-2.57) | 2.25 (1.94-2.61)                            | 2.35 (2.02-2.73) | 2.30 (1.91-2.77) |
| <b>HIV</b>                  |                                              |                  |                  |                  |                                             |                  |                  |
| All SMI                     | 1.48 (1.24-1.77)                             | 1.56 (1.35-1.80) | 1.47 (1.30-1.66) | 1.54 (1.37-1.73) | 1.65 (1.46-1.86)                            | 1.70 (1.47-1.96) | 1.58 (1.37-1.82) |
| Schizophrenia               | 0.88 (0.55-1.42)                             | 0.82 (0.54-1.24) | 0.82 (0.59-1.16) | 1.02 (0.76-1.37) | 1.04 (0.79-1.37)                            | 1.30 (0.98-1.72) | 1.40 (1.08-1.83) |
| Bipolar disorder            | 1.64 (1.26-2.13)                             | 1.60 (1.29-1.98) | 1.54 (1.29-1.84) | 1.56 (1.32-1.83) | 1.72 (1.48-2.01)                            | 1.78 (1.50-2.12) | 1.60 (1.32-1.93) |
| Other                       | 1.58 (1.24-2.01)                             | 1.81 (1.48-2.22) | 1.67 (1.40-2.00) | 1.75 (1.47-2.08) | 1.84 (1.55-2.20)                            | 1.81 (1.48-2.22) | 1.66 (1.35-2.05) |

## Adjusted odds ratios (95% confidence interval)

|                                        | Years before severe mental illness diagnosis |                  |                  | Index            | Years after severe mental illness diagnosis |                  |                  |
|----------------------------------------|----------------------------------------------|------------------|------------------|------------------|---------------------------------------------|------------------|------------------|
|                                        | -5                                           | -3               | -1               |                  | +1                                          | +3               | +5               |
| <b>Hypertension</b>                    |                                              |                  |                  |                  |                                             |                  |                  |
| All SMI                                | 0.81 (0.78-0.84)                             | 0.81 (0.78-0.84) | 0.82 (0.79-0.84) | 0.84 (0.82-0.87) | 0.91 (0.89-0.94)                            | 0.92 (0.89-0.95) | 0.98 (0.95-1.02) |
| Schizophrenia                          | 0.53 (0.48-0.58)                             | 0.54 (0.50-0.59) | 0.54 (0.50-0.59) | 0.57 (0.53-0.62) | 0.73 (0.68-0.78)                            | 0.76 (0.71-0.82) | 0.84 (0.77-0.90) |
| Bipolar disorder                       | 0.90 (0.85-0.95)                             | 0.93 (0.89-0.98) | 0.96 (0.91-1.01) | 1.01 (0.96-1.06) | 1.09 (1.05-1.14)                            | 1.08 (1.03-1.13) | 1.13 (1.07-1.19) |
| Other                                  | 0.85 (0.82-0.90)                             | 0.84 (0.80-0.88) | 0.83 (0.80-0.87) | 0.85 (0.81-0.88) | 0.87 (0.83-0.90)                            | 0.86 (0.82-0.90) | 0.92 (0.87-0.97) |
| <b>Peripheral Vascular Disease</b>     |                                              |                  |                  |                  |                                             |                  |                  |
| All SMI                                | 0.95 (0.85-1.06)                             | 0.98 (0.89-1.08) | 1.02 (0.94-1.11) | 1.05 (0.97-1.14) | 1.09 (1.01-1.18)                            | 1.17 (1.08-1.27) | 1.13 (1.03-1.24) |
| Schizophrenia                          | 0.63 (0.46-0.85)                             | 0.69 (0.53-0.91) | 0.74 (0.59-0.94) | 0.77 (0.63-0.96) | 0.88 (0.73-1.06)                            | 0.95 (0.79-1.14) | 1.07 (0.86-1.32) |
| Bipolar disorder                       | 0.96 (0.78-1.18)                             | 1.03 (0.86-1.22) | 1.08 (0.92-1.26) | 1.12 (0.96-1.30) | 1.17 (1.02-1.34)                            | 1.36 (1.19-1.54) | 1.30 (1.13-1.50) |
| Other                                  | 1.02 (0.89-1.17)                             | 1.03 (0.91-1.16) | 1.08 (0.97-1.20) | 1.10 (1.00-1.22) | 1.11 (1.01-1.23)                            | 1.13 (1.02-1.26) | 1.02 (0.89-1.16) |
| <b>Pulmonary Circulation Disorders</b> |                                              |                  |                  |                  |                                             |                  |                  |
| All SMI                                | 1.10 (0.95-1.27)                             | 1.19 (1.05-1.35) | 1.33 (1.19-1.49) | 1.41 (1.27-1.57) | 1.49 (1.35-1.64)                            | 1.63 (1.48-1.81) | 1.58 (1.41-1.78) |
| Schizophrenia                          | 0.66 (0.44-0.99)                             | 0.88 (0.62-1.24) | 1.04 (0.78-1.38) | 1.17 (0.91-1.51) | 1.25 (0.99-1.58)                            | 1.45 (1.15-1.82) | 1.58 (1.23-2.03) |
| Bipolar disorder                       | 1.43 (1.16-1.77)                             | 1.47 (1.21-1.78) | 1.57 (1.32-1.87) | 1.62 (1.38-1.89) | 1.72 (1.49-1.99)                            | 1.77 (1.53-2.06) | 1.74 (1.47-2.05) |
| Other                                  | 1.04 (0.86-1.26)                             | 1.12 (0.94-1.33) | 1.28 (1.11-1.49) | 1.36 (1.19-1.57) | 1.42 (1.26-1.61)                            | 1.60 (1.40-1.82) | 1.45 (1.22-1.73) |
| <b>Valvular Disease</b>                |                                              |                  |                  |                  |                                             |                  |                  |
| All SMI                                | 0.98 (0.88-1.09)                             | 0.97 (0.88-1.07) | 0.97 (0.89-1.07) | 0.98 (0.90-1.07) | 1.03 (0.95-1.12)                            | 0.97 (0.89-1.06) | 0.94 (0.85-1.04) |
| Schizophrenia                          | 0.79 (0.60-1.04)                             | 0.80 (0.62-1.02) | 0.76 (0.60-0.95) | 0.73 (0.58-0.90) | 0.80 (0.66-0.98)                            | 0.79 (0.65-0.97) | 0.72 (0.56-0.92) |
| Bipolar disorder                       | 0.99 (0.82-1.18)                             | 0.97 (0.82-1.14) | 0.99 (0.86-1.15) | 0.99 (0.86-1.15) | 1.07 (0.94-1.23)                            | 1.01 (0.88-1.16) | 0.95 (0.81-1.11) |
| Other                                  | 1.04 (0.90-1.20)                             | 1.02 (0.89-1.16) | 1.03 (0.92-1.16) | 1.06 (0.95-1.18) | 1.08 (0.97-1.19)                            | 1.01 (0.91-1.13) | 1.02 (0.89-1.18) |
| <b>Deficiency Anaemia</b>              |                                              |                  |                  |                  |                                             |                  |                  |
| All SMI                                | 1.12 (1.05-1.19)                             | 1.14 (1.07-1.20) | 1.17 (1.11-1.23) | 1.21 (1.15-1.27) | 1.29 (1.23-1.35)                            | 1.27 (1.22-1.33) | 1.29 (1.23-1.36) |
| Schizophrenia                          | 0.96 (0.82-1.11)                             | 0.94 (0.82-1.08) | 1.00 (0.89-1.12) | 1.02 (0.92-1.14) | 1.15 (1.05-1.27)                            | 1.16 (1.05-1.28) | 1.23 (1.11-1.37) |
| Bipolar disorder                       | 1.07 (0.96-1.18)                             | 1.10 (1.01-1.21) | 1.12 (1.03-1.21) | 1.15 (1.06-1.24) | 1.22 (1.13-1.30)                            | 1.22 (1.14-1.31) | 1.26 (1.17-1.36) |
| Other                                  | 1.21 (1.11-1.32)                             | 1.23 (1.14-1.33) | 1.26 (1.18-1.35) | 1.33 (1.24-1.41) | 1.39 (1.31-1.48)                            | 1.37 (1.28-1.46) | 1.36 (1.25-1.47) |
| <b>Blood Loss Anaemia</b>              |                                              |                  |                  |                  |                                             |                  |                  |
| All SMI                                | 0.77 (0.45-1.33)                             | 0.79 (0.49-1.28) | 1.05 (0.70-1.57) | 1.00 (0.69-1.46) | 1.02 (0.70-1.48)                            | 0.80 (0.52-1.22) | 0.66 (0.42-1.05) |
| Schizophrenia                          | 0.98 (0.32-2.99)                             | 1.25 (0.52-2.98) | 1.52 (0.76-3.03) | 1.68 (0.90-3.12) | 1.55 (0.84-2.88)                            | 0.87 (0.38-1.98) | 0.59 (0.22-1.60) |
| Bipolar disorder                       | 0.32 (0.08-1.31)                             | 0.52 (0.19-1.42) | 0.87 (0.42-1.79) | 0.78 (0.38-1.58) | 0.82 (0.42-1.59)                            | 0.56 (0.27-1.19) | 0.65 (0.32-1.30) |
| Other                                  | 1.02 (0.51-2.04)                             | 0.82 (0.41-1.61) | 1.00 (0.56-1.77) | 0.88 (0.50-1.55) | 0.95 (0.55-1.64)                            | 0.96 (0.54-1.70) | 0.71 (0.36-1.37) |
| <b>Coagulopathy</b>                    |                                              |                  |                  |                  |                                             |                  |                  |
| All SMI                                | 1.17 (0.99-1.38)                             | 1.12 (0.96-1.30) | 1.07 (0.93-1.23) | 1.11 (0.97-1.26) | 1.22 (1.08-1.38)                            | 1.28 (1.13-1.46) | 1.39 (1.21-1.59) |
| Schizophrenia                          | 0.76 (0.51-1.13)                             | 0.74 (0.51-1.07) | 0.75 (0.53-1.06) | 0.75 (0.54-1.04) | 0.85 (0.64-1.14)                            | 1.07 (0.81-1.40) | 1.11 (0.83-1.49) |
| Bipolar disorder                       | 1.30 (1.02-1.64)                             | 1.25 (1.00-1.56) | 1.22 (0.99-1.50) | 1.21 (1.00-1.47) | 1.30 (1.08-1.57)                            | 1.35 (1.11-1.64) | 1.42 (1.16-1.73) |
| Other                                  | 1.24 (1.00-1.53)                             | 1.16 (0.95-1.42) | 1.09 (0.91-1.31) | 1.18 (1.00-1.39) | 1.31 (1.12-1.53)                            | 1.33 (1.12-1.57) | 1.50 (1.25-1.80) |
| <b>Fluids and Electrolyte</b>          |                                              |                  |                  |                  |                                             |                  |                  |
| All SMI                                | 1.22 (1.05-1.41)                             | 1.21 (1.07-1.37) | 1.34 (1.21-1.49) | 1.52 (1.39-1.66) | 1.79 (1.66-1.93)                            | 1.92 (1.78-2.07) | 2.01 (1.86-2.18) |
| Schizophrenia                          | 0.86 (0.57-1.30)                             | 0.93 (0.67-1.29) | 0.96 (0.73-1.26) | 1.00 (0.79-1.28) | 1.24 (1.02-1.52)                            | 1.50 (1.26-1.79) | 1.53 (1.27-1.85) |
| Bipolar disorder                       | 1.51 (1.21-1.90)                             | 1.42 (1.17-1.73) | 1.66 (1.42-1.94) | 1.84 (1.60-2.11) | 2.24 (1.99-2.51)                            | 2.25 (2.02-2.51) | 2.29 (2.04-2.58) |
| Other                                  | 1.17 (0.97-1.41)                             | 1.18 (1.01-1.38) | 1.29 (1.14-1.47) | 1.51 (1.35-1.69) | 1.71 (1.56-1.88)                            | 1.86 (1.69-2.05) | 1.99 (1.78-2.22) |

\*adjusted for age, sex, ethnicity, index date calendar year, and primary care practice region

Code lists: Severe mental illness

| Read code | Term                                                         | Group   |
|-----------|--------------------------------------------------------------|---------|
| E110      | Manic disorder, single episode                               | bipolar |
| E110-1    | Hypomanic psychoses                                          | bipolar |
| E110-99   | Mania/hypomania                                              | bipolar |
| E1100     | Single manic episode, unspecified                            | bipolar |
| E1101     | Single manic episode, mild                                   | bipolar |
| E1102     | Single manic episode, moderate                               | bipolar |
| E1103     | Single manic episode, severe without mention of psychosis    | bipolar |
| E1104     | Single manic episode, severe, with psychosis                 | bipolar |
| E1105     | Single manic episode in partial or unspecified remission     | bipolar |
| E1106     | Single manic episode in full remission                       | bipolar |
| E110z     | Manic disorder, single episode NOS                           | bipolar |
| E111      | Recurrent manic episodes                                     | bipolar |
| E1110     | Recurrent manic episodes, unspecified                        | bipolar |
| E1111     | Recurrent manic episodes, mild                               | bipolar |
| E1112     | Recurrent manic episodes, moderate                           | bipolar |
| E1113     | Recurrent manic episodes, severe without mention psychosis   | bipolar |
| E1114     | Recurrent manic episodes, severe, with psychosis             | bipolar |
| E1115     | Recurrent manic episodes, partial or unspecified remission   | bipolar |
| E1116     | Recurrent manic episodes, in full remission                  | bipolar |
| E111z     | Recurrent manic episode NOS                                  | bipolar |
| E114      | Bipolar affective disorder, currently manic                  | bipolar |
| E114-1    | Manic-depressive - now manic                                 | bipolar |
| E1140     | Bipolar affective disorder, currently manic, unspecified     | bipolar |
| E1141     | Bipolar affective disorder, currently manic, mild            | bipolar |
| E1142     | Bipolar affective disorder, currently manic, moderate        | bipolar |
| E1143     | Bipolar affect disord, currently manic, severe, no psychosis | bipolar |
| E1144     | Bipolar affect disord, currently manic,severe with psychosis | bipolar |
| E1145     | Bipolar affect disord,currently manic, part/unspec remission | bipolar |
| E1146     | Bipolar affective disorder, currently manic, full remission  | bipolar |
| E114z     | Bipolar affective disorder, currently manic, NOS             | bipolar |
| E115      | Bipolar affective disorder, currently depressed              | bipolar |
| E115-1    | Manic-depressive - now depressed                             | bipolar |
| E1150     | Bipolar affective disorder, currently depressed, unspecified | bipolar |
| E1151     | Bipolar affective disorder, currently depressed, mild        | bipolar |
| E1152     | Bipolar affective disorder, currently depressed, moderate    | bipolar |
| E1153     | Bipolar affect disord, now depressed, severe, no psychosis   | bipolar |
| E1154     | Bipolar affect disord, now depressed, severe with psychosis  | bipolar |
| E1155     | Bipolar affect disord, now depressed, part/unspec remission  | bipolar |
| E1156     | Bipolar affective disorder, now depressed, in full remission | bipolar |
| E115z     | Bipolar affective disorder, currently depressed, NOS         | bipolar |
| E116      | Mixed bipolar affective disorder                             | bipolar |
| E1160     | Mixed bipolar affective disorder, unspecified                | bipolar |
| E1161     | Mixed bipolar affective disorder, mild                       | bipolar |
| E1162     | Mixed bipolar affective disorder, moderate                   | bipolar |

|         |                                                               |               |
|---------|---------------------------------------------------------------|---------------|
| E1163   | Mixed bipolar affective disorder, severe, without psychosis   | bipolar       |
| E1164   | Mixed bipolar affective disorder, severe, with psychosis      | bipolar       |
| E1165   | Mixed bipolar affective disorder, partial/unspec remission    | bipolar       |
| E1166   | Mixed bipolar affective disorder, in full remission           | bipolar       |
| E116z   | Mixed bipolar affective disorder, NOS                         | bipolar       |
| E117    | Unspecified bipolar affective disorder                        | bipolar       |
| E1170   | Unspecified bipolar affective disorder, unspecified           | bipolar       |
| E1171   | Unspecified bipolar affective disorder, mild                  | bipolar       |
| E1172   | Unspecified bipolar affective disorder, moderate              | bipolar       |
| E1173   | Unspecified bipolar affective disorder, severe, no psychosis  | bipolar       |
| E1174   | Unspecified bipolar affective disorder, severe with psychosis | bipolar       |
| E1175   | Unspecified bipolar affect disord, partial/unspec remission   | bipolar       |
| E1176   | Unspecified bipolar affective disorder, in full remission     | bipolar       |
| E117z   | Unspecified bipolar affective disorder, NOS                   | bipolar       |
| E11y    | Other and unspecified manic-depressive psychoses              | bipolar       |
| E11y0   | Unspecified manic-depressive psychoses                        | bipolar       |
| E11y1   | Atypical manic disorder                                       | bipolar       |
| E11y3   | Other mixed manic-depressive psychoses                        | bipolar       |
| E11yz   | Other and unspecified manic-depressive psychoses NOS          | bipolar       |
| E11z    | Other and unspecified affective psychoses                     | bipolar       |
| E11z0   | Unspecified affective psychoses NOS                           | bipolar       |
| E11zz   | Other affective psychosis NOS                                 | bipolar       |
| Eu20    | [X]Schizophrenia                                              | schizophrenia |
| Eu30    | [X]Manic episode                                              | bipolar       |
| Eu30-1  | [X]Bipolar disorder, single manic episode                     | bipolar       |
| Eu300   | [X]Hypomania                                                  | bipolar       |
| Eu301   | [X]Mania without psychotic symptoms                           | bipolar       |
| Eu302   | [X]Mania with psychotic symptoms                              | bipolar       |
| Eu302-1 | [X]Mania with mood-congruent psychotic symptoms               | bipolar       |
| Eu302-2 | [X]Mania with mood-incongruent psychotic symptoms             | bipolar       |
| Eu302-3 | [X]Manic stupor                                               | bipolar       |
| Eu30y   | [X]Other manic episodes                                       | bipolar       |
| Eu30z   | [X]Manic episode, unspecified                                 | bipolar       |
| Eu30z-1 | [X]Mania NOS                                                  | bipolar       |
| Eu31    | [X]Bipolar affective disorder                                 | bipolar       |
| Eu31-1  | [X]Manic-depressive illness                                   | bipolar       |
| Eu31-2  | [X]Manic-depressive psychosis                                 | bipolar       |
| Eu31-3  | [X]Manic-depressive reaction                                  | bipolar       |
| Eu310   | [X]Bipolar affective disorder, current episode hypomanic      | bipolar       |
| Eu311   | [X]Bipolar affect disorder cur epi manic wout psychotic symp  | bipolar       |
| Eu312   | [X]Bipolar affect disorder cur epi manic with psychotic symp  | bipolar       |
| Eu313   | [X]Bipolar affect disorder cur epi mild or moderate depressn  | bipolar       |
| Eu314   | [X]Bipol aff disord, curr epis sev depress, no psychot symp   | bipolar       |
| Eu315   | [X]Bipolar affect dis cur epi severe depres with psyc symp    | bipolar       |
| Eu316   | [X]Bipolar affective disorder, current episode mixed          | bipolar       |
| Eu317   | [X]Bipolar affective disorder, currently in remission         | bipolar       |

|         |                                                              |                 |
|---------|--------------------------------------------------------------|-----------------|
| Eu318   | [X]Bipolar affective disorder type I                         | bipolar         |
| Eu31y   | [X]Other bipolar affective disorders                         | bipolar         |
| Eu31y-1 | [X]Bipolar II disorder                                       | bipolar         |
| Eu31y-2 | [X]Recurrent manic episodes                                  | bipolar         |
| Eu31z   | [X]Bipolar affective disorder, unspecified                   | bipolar         |
| Eu333-2 | [X]Manic-depress psychosis,depressed type+psychotic symptoms | bipolar         |
| E11     | Affective psychoses                                          | bipolar         |
| E11-1   | Bipolar psychoses                                            | bipolar         |
| E11-99  | Manic-depressive psychoses                                   | bipolar         |
| Eu3z-1  | [X]Affective psychosis NOS                                   | bipolar         |
| 146D    | H/O: manic depressive disorder                               | bipolar         |
| 1S42    | Manic mood                                                   | bipolar         |
| ZV111-1 | [V]Personal history of manic-depressive psychosis            | bipolar         |
| ZV111-2 | [V]Personal history of manic-depressive psychosis            | bipolar         |
| Eu332-3 | [X]Manic-depress psychosis,depressd,no psychotic symptoms    | bipolar         |
| E104-1  | Oneirophrenia                                                | other psychosis |
| E105    | Latent schizophrenia                                         | other psychosis |
| E1050   | Unspecified latent schizophrenia                             | other psychosis |
| E1051   | Subchronic latent schizophrenia                              | other psychosis |
| E1052   | Chronic latent schizophrenia                                 | other psychosis |
| E1053   | Acute exacerbation of subchronic latent schizophrenia        | other psychosis |
| E1054   | Acute exacerbation of chronic latent schizophrenia           | other psychosis |
| E1055   | Latent schizophrenia in remission                            | other psychosis |
| E105z   | Latent schizophrenia NOS                                     | other psychosis |
| E107-1  | Cyclic schizophrenia                                         | other psychosis |
| E107-99 | Acute schizo affective psychosis                             | other psychosis |
| E12     | Paranoid states                                              | other psychosis |
| E12-99  | Paranoia                                                     | other psychosis |
| E120    | Simple paranoid state                                        | other psychosis |
| E121    | Chronic paranoid psychosis                                   | other psychosis |
| E121-1  | Sander's disease                                             | other psychosis |
| E122    | Paraphrenia                                                  | other psychosis |
| E123    | Shared paranoid disorder                                     | other psychosis |
| E123-1  | Folie a deux                                                 | other psychosis |
| E12y    | Other paranoid states                                        | other psychosis |
| E12y0   | Paranoia querulans                                           | other psychosis |
| E12yz   | Other paranoid states NOS                                    | other psychosis |
| E12z    | Paranoid psychosis NOS                                       | other psychosis |
| E13     | Other nonorganic psychoses                                   | other psychosis |
| E13-1   | Reactive psychoses                                           | other psychosis |
| E131    | Acute hysterical psychosis                                   | other psychosis |
| E133    | Acute paranoid reaction                                      | other psychosis |
| E133-1  | Bouffee delirante                                            | other psychosis |
| E134    | Psychogenic paranoid psychosis                               | other psychosis |
| E13y    | Other reactive psychoses                                     | other psychosis |
| E13y0   | Psychogenic stupor                                           | other psychosis |



|         |                                                              |                 |
|---------|--------------------------------------------------------------|-----------------|
| E13y1   | Brief reactive psychosis                                     | other psychosis |
| E13yz   | Other reactive psychoses NOS                                 | other psychosis |
| E13z    | Nonorganic psychosis NOS                                     | other psychosis |
| E13z-1  | Psychotic episode NOS                                        | other psychosis |
| Eu2     | [X]Schizophrenia, schizotypal and delusional disorders       | other psychosis |
| Eu21    | [X]Schizotypal disorder                                      | other psychosis |
| Eu21-1  | [X]Latent schizophrenic reaction                             | other psychosis |
| Eu21-2  | [X]Borderline schizophrenia                                  | other psychosis |
| Eu21-3  | [X]Latent schizophrenia                                      | other psychosis |
| Eu21-4  | [X]Prepsychotic schizophrenia                                | other psychosis |
| Eu21-5  | [X]Prodromal schizophrenia                                   | other psychosis |
| Eu21-6  | [X]Pseudoneurotic schizophrenia                              | other psychosis |
| Eu21-7  | [X]Pseudopsychopathic schizophrenia                          | other psychosis |
| Eu21-8  | [X]Schizotypal personality disorder                          | other psychosis |
| Eu22    | [X]Persistent delusional disorders                           | other psychosis |
| Eu220   | [X]Delusional disorder                                       | other psychosis |
| Eu220-1 | [X]Paranoid psychosis                                        | other psychosis |
| Eu220-2 | [X]Paranoid state                                            | other psychosis |
| Eu220-3 | [X]Paraphrenia - late                                        | other psychosis |
| Eu220-4 | [X]Sensitiver Beziehungswahn                                 | other psychosis |
| Eu220-5 | [X]Paranoia                                                  | other psychosis |
| Eu221   | [X]Delusional misidentification syndrome                     | other psychosis |
| Eu221-1 | [X]Capgras syndrome                                          | other psychosis |
| Eu22y   | [X]Other persistent delusional disorders                     | other psychosis |
| Eu22y-1 | [X]Delusional dysmorphophobia                                | other psychosis |
| Eu22y-2 | [X]Involutional paranoid state                               | other psychosis |
| Eu22y-3 | [X]Paranoia querulans                                        | other psychosis |
| Eu22z   | [X]Persistent delusional disorder, unspecified               | other psychosis |
| Eu23    | [X]Acute and transient psychotic disorders                   | other psychosis |
| Eu230   | [X]Acute polymorphic psychot disord without symp of schizoph | other psychosis |
| Eu230-1 | [X]Bouffee delirante                                         | other psychosis |
| Eu230-2 | [X]Cycloid psychosis                                         | other psychosis |
| Eu231   | [X]Acute polymorphic psychot disord with symp of schizophren | other psychosis |
| Eu231-1 | [X]Bouffee delirante with symptoms of schizophrenia          | other psychosis |
| Eu231-2 | [X]Cycloid psychosis with symptoms of schizophrenia          | other psychosis |
| Eu232   | [X]Acute schizophrenia-like psychotic disorder               | other psychosis |
| Eu232-1 | [X]Brief schizophreniform disorder                           | other psychosis |
| Eu232-2 | [X]Brief schizophrenifrm psych                               | other psychosis |
| Eu232-3 | [X]Oneirophrenia                                             | other psychosis |
| Eu233   | [X]Other acute predominantly delusional psychotic disorders  | other psychosis |
| Eu233-2 | [X]Psychogenic paranoid psychosis                            | other psychosis |
| Eu23y   | [X]Other acute and transient psychotic disorders             | other psychosis |
| Eu23z   | [X]Acute and transient psychotic disorder, unspecified       | other psychosis |
| Eu23z-1 | [X]Brief reactive psychosis NOS                              | other psychosis |
| Eu23z-2 | [X]Reactive psychosis                                        | other psychosis |
| Eu24    | [X]Induced delusional disorder                               | other psychosis |

|         |                                                            |                 |
|---------|------------------------------------------------------------|-----------------|
| Eu24-1  | [X]Folie a deux                                            | other psychosis |
| Eu24-2  | [X]Induced paranoid disorder                               | other psychosis |
| Eu24-3  | [X]Induced psychotic disorder                              | other psychosis |
| Eu25    | [X]Schizoaffective disorders                               | other psychosis |
| Eu250   | [X]Schizoaffective disorder, manic type                    | other psychosis |
| Eu250-1 | [X]Schizoaffective psychosis, manic type                   | other psychosis |
| Eu250-2 | [X]Schizophreniform psychosis, manic type                  | other psychosis |
| Eu251   | [X]Schizoaffective disorder, depressive type               | other psychosis |
| Eu251-1 | [X]Schizoaffective psychosis, depressive type              | other psychosis |
| Eu251-2 | [X]Schizophreniform psychosis, depressive type             | other psychosis |
| Eu252   | [X]Schizoaffective disorder, mixed type                    | other psychosis |
| Eu252-1 | [X]Cyclic schizophrenia                                    | other psychosis |
| Eu252-2 | [X]Mixed schizophrenic and affective psychosis             | other psychosis |
| Eu25y   | [X]Other schizoaffective disorders                         | other psychosis |
| Eu25z   | [X]Schizoaffective disorder, unspecified                   | other psychosis |
| Eu25z-1 | [X]Schizoaffective psychosis NOS                           | other psychosis |
| Eu2y    | [X]Other nonorganic psychotic disorders                    | other psychosis |
| Eu2y-1  | [X]Chronic hallucinatory psychosis                         | other psychosis |
| Eu2z    | [X]Unspecified nonorganic psychosis                        | other psychosis |
| Eu2z-1  | [X]Psychosis NOS                                           | other psychosis |
| E11-3   | Manic psychoses                                            | other psychosis |
| E1z     | Non-organic psychosis NOS                                  | other psychosis |
| 146H    | H/O: psychosis                                             | other psychosis |
| E1      | Non-organic psychoses                                      | other psychosis |
| E1y     | Other specified non-organic psychoses                      | other psychosis |
| Eu531-1 | [X]Puerperal psychosis NOS                                 | other psychosis |
| Eu843-4 | [X]Symbiotic psychosis                                     | other psychosis |
| E10     | Schizophrenic disorders                                    | schizophrenia   |
| E10-98  | Schizophrenic psychoses NOS                                | schizophrenia   |
| E10-99  | Schizophrenic psychoses                                    | schizophrenia   |
| E100    | Simple schizophrenia                                       | schizophrenia   |
| E100-1  | Schizophrenia simplex                                      | schizophrenia   |
| E1000   | Unspecified schizophrenia                                  | schizophrenia   |
| E1001   | Subchronic schizophrenia                                   | schizophrenia   |
| E1002   | Chronic schizophrenic                                      | schizophrenia   |
| E1003   | Acute exacerbation of subchronic schizophrenia             | schizophrenia   |
| E1004   | Acute exacerbation of chronic schizophrenia                | schizophrenia   |
| E1005   | Schizophrenia in remission                                 | schizophrenia   |
| E100z   | Simple schizophrenia NOS                                   | schizophrenia   |
| E101    | Hebephrenic schizophrenia                                  | schizophrenia   |
| E1010   | Unspecified hebephrenic schizophrenia                      | schizophrenia   |
| E1011   | Subchronic hebephrenic schizophrenia                       | schizophrenia   |
| E1012   | Chronic hebephrenic schizophrenia                          | schizophrenia   |
| E1013   | Acute exacerbation of subchronic hebephrenic schizophrenia | schizophrenia   |
| E1014   | Acute exacerbation of chronic hebephrenic schizophrenia    | schizophrenia   |
| E1015   | Hebephrenic schizophrenia in remission                     | schizophrenia   |

|         |                                                              |               |
|---------|--------------------------------------------------------------|---------------|
| E101z   | Hebephrenic schizophrenia NOS                                | schizophrenia |
| E102    | Catatonic schizophrenia                                      | schizophrenia |
| E1020   | Unspecified catatonic schizophrenia                          | schizophrenia |
| E1021   | Subchronic catatonic schizophrenia                           | schizophrenia |
| E1022   | Chronic catatonic schizophrenia                              | schizophrenia |
| E1023   | Acute exacerbation of subchronic catatonic schizophrenia     | schizophrenia |
| E1024   | Acute exacerbation of chronic catatonic schizophrenia        | schizophrenia |
| E1025   | Catatonic schizophrenia in remission                         | schizophrenia |
| E102z   | Catatonic schizophrenia NOS                                  | schizophrenia |
| E103    | Paranoid schizophrenia                                       | schizophrenia |
| E1030   | Unspecified paranoid schizophrenia                           | schizophrenia |
| E1031   | Subchronic paranoid schizophrenia                            | schizophrenia |
| E1032   | Chronic paranoid schizophrenia                               | schizophrenia |
| E1033   | Acute exacerbation of subchronic paranoid schizophrenia      | schizophrenia |
| E1034   | Acute exacerbation of chronic paranoid schizophrenia         | schizophrenia |
| E1035   | Paranoid schizophrenia in remission                          | schizophrenia |
| E103z   | Paranoid schizophrenia NOS                                   | schizophrenia |
| E104    | Acute schizophrenic episode                                  | schizophrenia |
| E106    | Residual schizophrenia                                       | schizophrenia |
| E106-1  | Restzustand - schizophrenia                                  | schizophrenia |
| E107    | Schizo-affective schizophrenia                               | schizophrenia |
| E1070   | Unspecified schizo-affective schizophrenia                   | schizophrenia |
| E1071   | Subchronic schizo-affective schizophrenia                    | schizophrenia |
| E1072   | Chronic schizo-affective schizophrenia                       | schizophrenia |
| E1073   | Acute exacerbation subchronic schizo-affective schizophrenia | schizophrenia |
| E1074   | Acute exacerbation of chronic schizo-affective schizophrenia | schizophrenia |
| E1075   | Schizo-affective schizophrenia in remission                  | schizophrenia |
| E107z   | Schizo-affective schizophrenia NOS                           | schizophrenia |
| E10y    | Other schizophrenia                                          | schizophrenia |
| E10y-1  | Cenesthopathic schizophrenia                                 | schizophrenia |
| E10y0   | Atypical schizophrenia                                       | schizophrenia |
| E10y1   | Coenesthopathic schizophrenia                                | schizophrenia |
| E10yz   | Other schizophrenia NOS                                      | schizophrenia |
| E10z    | Schizophrenia NOS                                            | schizophrenia |
| Eu200   | [X]Paranoid schizophrenia                                    | schizophrenia |
| Eu200-1 | [X]Paraphrenic schizophrenia                                 | schizophrenia |
| Eu201   | [X]Hebephrenic schizophrenia                                 | schizophrenia |
| Eu201-1 | [X]Disorganised schizophrenia                                | schizophrenia |
| Eu202   | [X]Catatonic schizophrenia                                   | schizophrenia |
| Eu202-1 | [X]Catatonic stupor                                          | schizophrenia |
| Eu202-2 | [X]Schizophrenic catalepsy                                   | schizophrenia |
| Eu202-3 | [X]Schizophrenic catatonia                                   | schizophrenia |
| Eu202-4 | [X]Schizophrenic flexibilatis cerea                          | schizophrenia |
| Eu203   | [X]Undifferentiated schizophrenia                            | schizophrenia |
| Eu203-1 | [X]Atypical schizophrenia                                    | schizophrenia |
| Eu204   | [X]Post-schizophrenic depression                             | schizophrenia |

|         |                                           |               |
|---------|-------------------------------------------|---------------|
| Eu205   | [X]Residual schizophrenia                 | schizophrenia |
| Eu205-1 | [X]Chronic undifferentiated schizophrenia | schizophrenia |
| Eu205-2 | [X]Restzustand schizophrenic              | schizophrenia |
| Eu206   | [X]Simple schizophrenia                   | schizophrenia |
| Eu20y   | [X]Other schizophrenia                    | schizophrenia |
| Eu20y-1 | [X]Cenesthopathic schizophrenia           | schizophrenia |
| Eu20y-2 | [X]Schizophreniform disord NOS            | schizophrenia |
| Eu20y-3 | [X]Schizophrenifrm psychos NOS            | schizophrenia |
| Eu20z   | [X]Schizophrenia, unspecified             | schizophrenia |
| Eu232-4 | [X]Schizophrenic reaction                 | schizophrenia |
| ZV110   | [V]Personal history of schizophrenia      | schizophrenia |
| 1464    | H/O: schizophrenia                        | schizophrenia |

**Additional EMIS codes**

|                 | <b>Term</b>                                                                 | <b>Group</b>    |
|-----------------|-----------------------------------------------------------------------------|-----------------|
| EMISQHY1        | Hypomanic                                                                   | bipolar         |
| EGTON118        | Obsessional compulsive psychosis                                            | other psychosis |
| EMISCDE13       | Delusions                                                                   | other psychosis |
| EMISICD10 F2381 | Other acute and transient psychotic disorders, with associated acute stress | other psychosis |
| EMISQPA1        | Paranoid                                                                    | other psychosis |
| EMISICD10 F2018 | Hebephrenic schizophrenia, other                                            | schizophrenia   |
| EMISICD10 F2035 | Undifferentiated schizophrenia, complete remission                          | schizophrenia   |
| EMISICD10 F2041 | Post-schizophrenic depression, episodic with progressive deficit            | schizophrenia   |
| EMISICD10 F2054 | Residual schizophrenia, incomplete remission                                | schizophrenia   |
| EMISICD10 F2065 | Simple schizophrenia, complete remission                                    | schizophrenia   |
| EMISICD10 F2098 | Schizophrenia, unspecified, other                                           | schizophrenia   |

*Code lists: Chronic physical health conditions*

| <b>Read code</b> | <b>Term</b>                                           | <b>Group</b> |
|------------------|-------------------------------------------------------|--------------|
| H330000          | extrinsic asthma without status asthmaticus           | Asthma       |
| 38DT.00          | asthma control questionnaire                          | Asthma       |
| 38DV.00          | mini asthma quality of life questionnaire             | Asthma       |
| 9NNX.00          | under care of asthma specialist nurse                 | Asthma       |
| 8CMA000          | patient has a written asthma personal action plan     | Asthma       |
| 679J000          | health education - asthma self management             | Asthma       |
| 679J100          | health education - structured asthma discussion       | Asthma       |
| 663t.00          | asthma causes daytime symptoms 1 to 2 times per month | Asthma       |
| 663u.00          | asthma causes daytime symptoms 1 to 2 times per week  | Asthma       |
| 663v.00          | asthma causes daytime symptoms most days              | Asthma       |
| 663r.00          | asthma causes night symptoms 1 to 2 times per month   | Asthma       |
| 663x.00          | asthma limits walking on the flat                     | Asthma       |
| 663w.00          | asthma limits walking up hills or stairs              | Asthma       |
| 663s.00          | asthma never causes daytime symptoms                  | Asthma       |
| 663y.00          | number of asthma exacerbations in past year           | Asthma       |
| 663V100          | mild asthma                                           | Asthma       |
| 663V200          | moderate asthma                                       | Asthma       |

|         |                                                                 |        |
|---------|-----------------------------------------------------------------|--------|
| 663V000 | occasional asthma                                               | Asthma |
| 663V300 | severe asthma                                                   | Asthma |
| 663p.00 | asthma treatment compliance unsatisfactory                      | Asthma |
| 663n.00 | asthma treatment compliance satisfactory                        | Asthma |
| 663q.00 | asthma daytime symptoms                                         | Asthma |
| 9hA2.00 | excepted from asthma quality indicators: informed dissent       | Asthma |
| 9hA..00 | exception reporting: asthma quality indicators                  | Asthma |
| H33z011 | severe asthma attack                                            | Asthma |
| H330.11 | allergic asthma                                                 | Asthma |
| 66Y5.00 | change in asthma management plan                                | Asthma |
| 66Y9.00 | step up change in asthma management plan                        | Asthma |
| 66YA.00 | step down change in asthma management plan                      | Asthma |
| 66YC.00 | absent from work or school due to asthma                        | Asthma |
| 66YE.00 | asthma monitoring due                                           | Asthma |
| 66YJ.00 | asthma annual review                                            | Asthma |
| 66YK.00 | asthma follow-up                                                | Asthma |
| 8B3j.00 | asthma medication review                                        | Asthma |
| 66YP.00 | asthma night-time symptoms                                      | Asthma |
| H35y600 | sequoiosis (red-cedar asthma)                                   | Asthma |
| H330100 | extrinsic asthma with status asthmaticus                        | Asthma |
| 9hA1.00 | excepted from asthma quality indicators: patient unsuitable     | Asthma |
| 9OJZ.00 | asthma monitoring admin.nos                                     | Asthma |
| 66Yq.00 | asthma causes night time symptoms 1 to 2 times per week         | Asthma |
| 66Yr.00 | asthma causes symptoms most nights                              | Asthma |
| 663P000 | asthma limits activities 1 to 2 times per month                 | Asthma |
| 663P100 | asthma limits activities 1 to 2 times per week                  | Asthma |
| 663P200 | asthma limits activities most days                              | Asthma |
| 178A.00 | asthma trigger - airborne dust                                  | Asthma |
| 178B.00 | asthma trigger - exercise                                       | Asthma |
| 1781.00 | asthma trigger - pollen                                         | Asthma |
| 1782.00 | asthma trigger - tobacco smoke                                  | Asthma |
| 1783.00 | asthma trigger - warm air                                       | Asthma |
| 679J200 | health education - structured patient focused asthma discuss    | Asthma |
| 66Yp.00 | asthma review using royal college of physicians three questions | Asthma |
| 388t000 | royal college physician asthma assessment 3 question score      | Asthma |
| 66Ys.00 | asthma never causes night symptoms                              | Asthma |
| 178..00 | asthma trigger                                                  | Asthma |
| 679J.00 | health education - asthma                                       | Asthma |
| 66YQ.00 | asthma monitoring by nurse                                      | Asthma |
| 66YR.00 | asthma monitoring by doctor                                     | Asthma |
| 102..00 | asthma confirmed                                                | Asthma |
| 66Yu.00 | number days absent from school due to asthma in past 6 month    | Asthma |
| 661N100 | asthma self-management plan review                              | Asthma |
| 661M100 | asthma self-management plan agreed                              | Asthma |
| H331000 | intrinsic asthma without status asthmaticus                     | Asthma |
| 9OJ..00 | asthma monitoring admin.                                        | Asthma |

|         |                                                           |        |
|---------|-----------------------------------------------------------|--------|
| 663m.00 | asthma accident and emergency attendance since last visit | Asthma |
| H335.00 | chronic asthma with fixed airflow obstruction             | Asthma |
| 66YZ.00 | does not have asthma management plan                      | Asthma |
| 8CR0.00 | asthma clinical management plan                           | Asthma |
| 13Y4.00 | asthma society member                                     | Asthma |
| 14B4.00 | h/o: asthma                                               | Asthma |
| 663N.00 | asthma disturbing sleep                                   | Asthma |
| 663N000 | asthma causing night waking                               | Asthma |
| 663N100 | asthma disturbs sleep weekly                              | Asthma |
| 663N200 | asthma disturbs sleep frequently                          | Asthma |
| 663O.00 | asthma not disturbing sleep                               | Asthma |
| 663O000 | asthma never disturbs sleep                               | Asthma |
| 663P.00 | asthma limiting activities                                | Asthma |
| 663Q.00 | asthma not limiting activities                            | Asthma |
| 663U.00 | asthma management plan given                              | Asthma |
| 663V.00 | asthma severity                                           | Asthma |
| 663W.00 | asthma prophylactic medication used                       | Asthma |
| 663d.00 | emergency asthma admission since last appointment         | Asthma |
| 663e.00 | asthma restricts exercise                                 | Asthma |
| 663e000 | asthma sometimes restricts exercise                       | Asthma |
| 663e100 | asthma severely restricts exercise                        | Asthma |
| 663f.00 | asthma never restricts exercise                           | Asthma |
| 8793.00 | asthma control step 0                                     | Asthma |
| 8794.00 | asthma control step 1                                     | Asthma |
| 8795.00 | asthma control step 2                                     | Asthma |
| 8796.00 | asthma control step 3                                     | Asthma |
| 8797.00 | asthma control step 4                                     | Asthma |
| 8798.00 | asthma control step 5                                     | Asthma |
| 8CE2.00 | asthma leaflet given                                      | Asthma |
| 8H2P.00 | emergency admission, asthma                               | Asthma |
| 9N1d.00 | seen in asthma clinic                                     | Asthma |
| 9OJ1.00 | attends asthma monitoring                                 | Asthma |
| 9OJ2.00 | refuses asthma monitoring                                 | Asthma |
| 9OJ3.00 | asthma monitor offer default                              | Asthma |
| 9OJ9.00 | asthma monitoring deleted                                 | Asthma |
| 9NI8.00 | asthma outreach clinic                                    | Asthma |
| H312000 | chronic asthmatic bronchitis                              | Asthma |
| H33..11 | bronchial asthma                                          | Asthma |
| H33..00 | asthma                                                    | Asthma |
| H330z00 | extrinsic asthma nos                                      | Asthma |
| H331z00 | intrinsic asthma nos                                      | Asthma |
| H332.00 | mixed asthma                                              | Asthma |
| H33z.00 | asthma unspecified                                        | Asthma |
| 1786.00 | asthma trigger - animals                                  | Asthma |
| H334.00 | brittle asthma                                            | Asthma |
| H330.12 | childhood asthma                                          | Asthma |

|         |                                                              |                    |
|---------|--------------------------------------------------------------|--------------------|
| H331.11 | late onset asthma                                            | Asthma             |
| H33z200 | late-onset asthma                                            | Asthma             |
| H330111 | extrinsic asthma with asthma attack                          | Asthma             |
| H33zz12 | allergic asthma nec                                          | Asthma             |
| H330011 | hay fever with asthma                                        | Asthma             |
| H330.14 | pollen asthma                                                | Asthma             |
| H331111 | intrinsic asthma with asthma attack                          | Asthma             |
| H331.00 | intrinsic asthma                                             | Asthma             |
| H33z000 | status asthmaticus nos                                       | Asthma             |
| H33z100 | asthma attack                                                | Asthma             |
| H33zz00 | asthma nos                                                   | Asthma             |
| 90JA.11 | asthma monitored                                             | Asthma             |
| 90JA.00 | asthma monitoring check done                                 | Asthma             |
| H33z111 | asthma attack nos                                            | Asthma             |
| 663..11 | asthma monitoring                                            | Asthma             |
| H333.00 | acute exacerbation of asthma                                 | Asthma             |
| 663j.00 | asthma - currently active                                    | Asthma             |
| 663h.00 | asthma - currently dormant                                   | Asthma             |
| 90J4.00 | asthma monitor 1st letter                                    | Asthma             |
| 90J5.00 | asthma monitor 2nd letter                                    | Asthma             |
| 90J6.00 | asthma monitor 3rd letter                                    | Asthma             |
| 90J8.00 | asthma monitor phone invite                                  | Asthma             |
| 90J7.00 | asthma monitor verbal invite                                 | Asthma             |
| 1788.00 | asthma trigger - cold air                                    | Asthma             |
| 1785.00 | asthma trigger - damp                                        | Asthma             |
| 1784.00 | asthma trigger - emotion                                     | Asthma             |
| 1789.00 | asthma trigger - respiratory infection                       | Asthma             |
| 1787.00 | asthma trigger - seasonal                                    | Asthma             |
| 173A.00 | exercise induced asthma                                      | Asthma             |
| H33zz11 | exercise induced asthma                                      | Asthma             |
| H330.00 | extrinsic (atopic) asthma                                    | Asthma             |
| H47y000 | detergent asthma                                             | Asthma             |
| 8791.00 | further asthma - drug prevent.                               | Asthma             |
| H330.13 | hay fever with asthma                                        | Asthma             |
| 1780.00 | aspirin induced asthma                                       | Asthma             |
| H35y700 | wood asthma                                                  | Asthma             |
| 173c.00 | occupational asthma                                          | Asthma             |
| 173d.00 | work aggravated asthma                                       | Asthma             |
| H331100 | intrinsic asthma with status asthmaticus                     | Asthma             |
| 66Yp.00 | asthma review using roy colleg of physicians three questions | Asthma             |
| 8H2P.00 | \emergency admission, asthma\''''                            | Asthma             |
| D000.11 | normocytic anaemia due to chronic blood loss                 | Blood loss anaemia |
| D211.11 | normocytic anaemia following acute bleed                     | Blood loss anaemia |
| D000.12 | iron deficiency anaemia due to blood loss                    | Blood loss anaemia |
| D000.00 | iron deficiency anaemia due to chronic blood loss            | Blood loss anaemia |
| B226.00 | mesothelioma                                                 | Cancer             |

|         |                                                           |        |
|---------|-----------------------------------------------------------|--------|
| B471100 | teratoma of descended testis                              | Cancer |
| B47z.12 | teratoma of testis                                        | Cancer |
| B470300 | teratoma of undescended testis                            | Cancer |
| 4M23.00 | lymphoma stage iv                                         | Cancer |
| B933.11 | cystosarcoma phyllodes                                    | Cancer |
| B50..00 | malignant neoplasm of eye                                 | Cancer |
| B540000 | malignant neoplasm of adrenal cortex                      | Cancer |
| B540100 | malignant neoplasm of adrenal medulla                     | Cancer |
| B43..00 | malignant neoplasm of body of uterus                      | Cancer |
| B453.00 | malignant neoplasm of clitoris                            | Cancer |
| B34..00 | malignant neoplasm of female breast                       | Cancer |
| B600.00 | reticulosarcoma                                           | Cancer |
| B576000 | secondary malignant neoplasm of retroperitoneum           | Cancer |
| B106.00 | malignant neoplasm, overlapping lesion of oesophagus      | Cancer |
| BB2C.00 | [m]squamous cell carcinoma, keratinising type nos         | Cancer |
| BB5R600 | [m]mucocarcinoid tumour, malignant                        | Cancer |
| ZV10016 | [v]personal history of malignant neoplasm of oesophagus   | Cancer |
| ZV10611 | [v]personal history of lymphoid leukaemia                 | Cancer |
| ZV10613 | [v]personal history of myeloid leukaemia                  | Cancer |
| ZV10612 | [v]personal history of monocytic leukaemia                | Cancer |
| ZV10713 | [v]personal history of other haematopoietic neoplasm      | Cancer |
| BBe9.00 | [m]triton tumour, malignant                               | Cancer |
| B134.00 | malignant neoplasm of caecum                              | Cancer |
| B10z.11 | oesophageal cancer                                        | Cancer |
| B10..00 | malignant neoplasm of oesophagus                          | Cancer |
| BBTK.00 | [m]epithelioid haemangioendothelioma, malignant           | Cancer |
| BBEV.00 | [m]blue naevus, malignant                                 | Cancer |
| BBr2700 | [m]adult t-cell leukaemia/lymphoma                        | Cancer |
| B801200 | carcinoma in situ of lower 1/3 oesophagus                 | Cancer |
| B801100 | carcinoma in situ of middle 1/3 oesophagus                | Cancer |
| B801000 | carcinoma in situ of upper 1/3 oesophagus                 | Cancer |
| B084.00 | malignant neoplasm, overlapping lesion of hypopharynx     | Cancer |
| B508.00 | malignant neoplasm, overlapping lesion of eye and adnexa  | Cancer |
| B074.00 | malignant neoplasm, overlapping lesion of nasopharynx     | Cancer |
| B214.00 | malignant neoplasm, overlapping lesion of larynx          | Cancer |
| B017.00 | malignant overlapping lesion of tongue                    | Cancer |
| B042.00 | malignant neoplasm, overlapping lesion of floor of mouth  | Cancer |
| B117.00 | malignant neoplasm, overlapping lesion of stomach         | Cancer |
| B124.00 | malignant neoplasm, overlapping lesion of small intestine | Cancer |
| B163.00 | malignant neoplasm, overlapping lesion of biliary tract   | Cancer |
| B175.00 | malignant neoplasm, overlapping lesion of pancreas        | Cancer |
| B487.00 | malignant neoplasm, overlapping lesion of penis           | Cancer |
| B627600 | diffuse non-hodgkin's immunoblastic (diffuse) lymphoma    | Cancer |
| BB5S200 | [m]bronchiolo-alveolar adenocarcinoma                     | Cancer |
| B614.00 | hodgkin's disease, nodular sclerosis                      | Cancer |
| BBv2.00 | [m]angiocentric-cell lymphoma                             | Cancer |



|         |                                                              |        |
|---------|--------------------------------------------------------------|--------|
| BBm3.00 | [m]letterer - siwe disease                                   | Cancer |
| BBm4.00 | [m>true histiocytic lymphoma                                 | Cancer |
| BBj..00 | [m]hodgkin's disease                                         | Cancer |
| F122.00 | malignant neuroleptic syndrome                               | Cancer |
| BB5D800 | [m]hepatocellular carcinoma, fibrolamellar                   | Cancer |
| BBK0700 | [m]myxoid leiomyosarcoma                                     | Cancer |
| BBEG000 | [m]acral lentiginous melanoma, malignant                     | Cancer |
| BBLG.00 | [m]carcinoma in pleomorphic adenoma                          | Cancer |
| BB5f111 | [m]follicular carcinoma                                      | Cancer |
| BBgC.11 | [m]lymphocytic lymphoma nos                                  | Cancer |
| BBgC.12 | [m]lymphocytic lymphosarcoma nos                             | Cancer |
| BBgG.12 | [m]lymphoblastic lymphoma nos                                | Cancer |
| BBgJ.11 | [m]germinoblastic sarcoma nos                                | Cancer |
| BBg7.00 | [m]malignant lymphoma, lymphoplasmacytoid type               | Cancer |
| BBQ7200 | [m]teratoma, malignant, nos                                  | Cancer |
| BB1N.00 | [m]small cell-large cell carcinoma                           | Cancer |
| BBV1.00 | [m]osteosarcoma nos                                          | Cancer |
| BB5D500 | [m]hepatocellular carcinoma nos                              | Cancer |
| BBmD.00 | [m] cutaneous lymphoma                                       | Cancer |
| BBH1.00 | [m]myxosarcoma                                               | Cancer |
| BBLE.00 | [m]adenosarcoma                                              | Cancer |
| ZV10013 | [v]personal history of malignant neoplasm of intestine       | Cancer |
| ZV10018 | [v]personal history of malignant neoplasm of stomach         | Cancer |
| ZV10017 | [v]personal history of malignant neoplasm of rectum          | Cancer |
| ZV10011 | [v]personal history of malignant neoplasm of anus            | Cancer |
| ZV10019 | [v]personal history of malignant neoplasm of tongue          | Cancer |
| ZV10014 | [v]personal history of malignant neoplasm of large intestine | Cancer |
| ZV10015 | [v]personal history of malignant neoplasm of liver           | Cancer |
| ZV10111 | [v]personal history of malignant neoplasm of bronchus        | Cancer |
| ZV10112 | [v]personal history of malignant neoplasm of lung            | Cancer |
| ZV10113 | [v]personal history of malignant neoplasm of trachea         | Cancer |
| ZV10213 | [v]personal history of malignant neoplasm of middle ear      | Cancer |
| ZV10211 | [v]personal history of malignant neoplasm - accessory sinus  | Cancer |
| ZV10212 | [v]personal history of malignant neoplasm of larynx          | Cancer |
| ZV10214 | [v]personal history of malignant neoplasm of nose            | Cancer |
| ZV10416 | [v]personal history of malignant neoplasm of testis          | Cancer |
| ZV10417 | [v]personal history of malignant neoplasm of uterine body    | Cancer |
| ZV10415 | [v]personal history of malignant neoplasm of prostate        | Cancer |
| ZV10414 | [v]personal history of malignant neoplasm of ovary           | Cancer |
| ZV10411 | [v]personal history of malignant neoplasm of cervix uteri    | Cancer |
| ZV10511 | [v]personal history of malignant neoplasm of bladder         | Cancer |
| ZV10513 | [v]personal history of malignant neoplasm of kidney          | Cancer |
| ZV10711 | [v]personal history of hodgkin's disease                     | Cancer |
| ZV10712 | [v]personal history of lymphosarcoma                         | Cancer |
| ZV10714 | [v]personal history of reticulosarcoma                       | Cancer |
| ZV10y14 | [v]personal history of malignant neoplasm of skin            | Cancer |

|         |                                                             |        |
|---------|-------------------------------------------------------------|--------|
| ZV10y11 | [v]personal history of malignant neoplasm of bone           | Cancer |
| ZV10y12 | [v]personal history of malignant neoplasm of brain          | Cancer |
| ZV10y15 | [v]personal history of malignant neoplasm of thyroid        | Cancer |
| ZV10y13 | [v]personal history of malignant neoplasm of eye            | Cancer |
| BB5y000 | [m]basal cell adenocarcinoma                                | Cancer |
| BB91100 | [m]infiltrating duct and lobular carcinoma                  | Cancer |
| BBrA312 | [m]granulocytic sarcoma                                     | Cancer |
| B41..00 | malignant neoplasm of cervix uteri                          | Cancer |
| B000.00 | malignant neoplasm of upper lip, vermilion border           | Cancer |
| B001100 | malignant neoplasm of lower lip, lipstick area              | Cancer |
| B010.11 | malignant neoplasm of posterior third of tongue             | Cancer |
| B02..00 | malignant neoplasm of major salivary glands                 | Cancer |
| B021.00 | malignant neoplasm of submandibular gland                   | Cancer |
| B055100 | malignant neoplasm of roof of mouth                         | Cancer |
| B060100 | malignant neoplasm of palatine tonsil                       | Cancer |
| B060000 | malignant neoplasm of faucial tonsil                        | Cancer |
| B070.00 | malignant neoplasm of roof of nasopharynx                   | Cancer |
| B180.00 | malignant neoplasm of retroperitoneum                       | Cancer |
| B200.00 | malignant neoplasm of nasal cavities                        | Cancer |
| B203.00 | malignant neoplasm of ethmoid sinus                         | Cancer |
| B310000 | malignant neoplasm of soft tissue of head                   | Cancer |
| B310100 | malignant neoplasm of soft tissue of face                   | Cancer |
| B310200 | malignant neoplasm of soft tissue of neck                   | Cancer |
| B440.11 | cancer of ovary                                             | Cancer |
| B480.00 | malignant neoplasm of prepuce (foreskin)                    | Cancer |
| BBj7.00 | [m]hodgkin's disease, nodular sclerosis, cellular phase     | Cancer |
| BBE1000 | [m]malignant melanoma, regressing                           | Cancer |
| BBk7.00 | [m]malignant lymphoma, centroblastic type, follicular       | Cancer |
| BBj2.00 | [m]hodgkin's disease, mixed cellularity                     | Cancer |
| BBEG.00 | [m]malignant melanoma in hutchinson's melanotic freckle     | Cancer |
| BBR2.00 | [m]choriocarcinoma                                          | Cancer |
| BBgR.00 | [m]malignant lymphoma, large cell, diffuse nos              | Cancer |
| BB5L300 | [m]adenocarcinoma in multiple adenomatous polyps            | Cancer |
| BB51000 | [m]adenocarcinoma in situ in villous adenoma                | Cancer |
| BBI1.00 | [m]sezary's disease                                         | Cancer |
| BBTA.00 | [m]kaposi's sarcoma                                         | Cancer |
| BBgP.00 | [m]malignant lymphoma, mixed small and large cell, diffuse  | Cancer |
| BBp2.00 | [m]malignant mastocytosis                                   | Cancer |
| BB5RA00 | [m]merkel cell carcinoma                                    | Cancer |
| BB51100 | [m]adenocarcinoma in situ in tubulovillous adenoma          | Cancer |
| BBE1100 | [m]desmoplastic melanoma, malignant                         | Cancer |
| BB5D700 | [m]combined hepatocellular carcinoma and cholangiocarcinoma | Cancer |
| BBG1.00 | [m]fibrosarcoma nos                                         | Cancer |
| BB9K000 | [m]paget's disease and intraductal carcinoma of breast      | Cancer |
| BB69100 | [m]sebaceous adenocarcinoma                                 | Cancer |
| BB5R900 | [m]neuroendocrine carcinoma                                 | Cancer |

|         |                                                             |        |
|---------|-------------------------------------------------------------|--------|
| BB52000 | [m]adenocarcinoma in tubulovillous adenoma                  | Cancer |
| BB29.00 | [m]squamous cell carcinoma in situ nos                      | Cancer |
| BB1M.00 | [m]small cell carcinoma, intermediate cell                  | Cancer |
| BB5L200 | [m]adenocarcinoma in situ in adenomatous polyp              | Cancer |
| BBGP.00 | [m]pigmented dermatofibrosarcoma protuberans                | Cancer |
| BBN1.00 | [m]synovial sarcoma nos                                     | Cancer |
| BB91000 | [m]intraductal papillary adenocarcinoma with invasion       | Cancer |
| BBgL.00 | [m]malignant lymphoma, small lymphocytic nos                | Cancer |
| BBJH.00 | [m]dedifferentiated liposarcoma                             | Cancer |
| BB14.00 | [m]carcinomatosis                                           | Cancer |
| BBj1100 | [m]hodgkin,s disease, lymphocytic predominance, nodular     | Cancer |
| BBj9.00 | [m]hodgkin's granuloma                                      | Cancer |
| F373.00 | polyneuropathy in malignant disease                         | Cancer |
| BBEX.00 | [m]melanoma in situ                                         | Cancer |
| BBg8.00 | [m]malignant lymphoma, immunoblastic type                   | Cancer |
| BBLH.00 | [m]rhabdoid sarcoma                                         | Cancer |
| BB01.00 | [m]neoplasm, uncertain whether benign or malignant          | Cancer |
| BBF4.00 | [m]giant cell sarcoma (except of bone)                      | Cancer |
| BBEN.11 | [m]juvenila melanoma                                        | Cancer |
| BBf2.00 | [m]alveolar soft part sarcoma                               | Cancer |
| B823000 | carcinoma in situ of skin of forehead skin                  | Cancer |
| B323000 | malignant melanoma of external surface of cheek             | Cancer |
| B323200 | malignant melanoma of eyebrow                               | Cancer |
| B323400 | malignant melanoma of external surface of nose              | Cancer |
| B585.00 | secondary malignant neoplasm of bone and bone marrow        | Cancer |
| B576100 | secondary malignant neoplasm of peritoneum                  | Cancer |
| BBB7.00 | [m]epithelial-myoepithelial carcinoma                       | Cancer |
| B62F100 | mantle cell lymphoma                                        | Cancer |
| 4M21.00 | lymphoma stage ii                                           | Cancer |
| B674.00 | acute panmyelosis                                           | Cancer |
| H51y700 | malignant pleural effusion                                  | Cancer |
| 4M70.00 | clark melanoma level 1                                      | Cancer |
| B630100 | solitary myeloma                                            | Cancer |
| A220.11 | malignant pustule                                           | Cancer |
| 1925NB  | neuroblastoma                                               | Cancer |
| B622.00 | sezary's disease                                            | Cancer |
| B622500 | sezary's disease of lymph nodes of inguinal region and leg  | Cancer |
| B622700 | sezary's disease of spleen                                  | Cancer |
| 44a4.00 | squamous cell carcinoma antigen level                       | Cancer |
| 100..00 | cancer confirmed                                            | Cancer |
| 8CP0.00 | cancer care plan discussed with patient                     | Cancer |
| B575z00 | secondary malig neop of large intestine or rectum nos       | Cancer |
| B57..00 | secondary malig neop of respiratory and digestive systems   | Cancer |
| B57z.00 | secondary malig neop of respiratory or digestive system nos | Cancer |
| B576.00 | secondary malig neop of retroperitoneum and peritoneum      | Cancer |
| B576z00 | secondary malig neop of retroperitoneum or peritoneum nos   | Cancer |

|         |                                                              |        |
|---------|--------------------------------------------------------------|--------|
| B574z00 | secondary malig neop of small intestine or duodenum nos      | Cancer |
| B575.00 | secondary malignant neoplasm of large intestine and rectum   | Cancer |
| B153.00 | secondary malignant neoplasm of liver                        | Cancer |
| B58yz00 | secondary malignant neoplasm of other specified site nos     | Cancer |
| B58..00 | secondary malignant neoplasm of other specified sites        | Cancer |
| B574.00 | secondary malignant neoplasm of small intestine and duodenum | Cancer |
| B560z00 | secondary unspec malig neop lymph nodes head/face/neck nos   | Cancer |
| B8yy100 | carcinoma in situ of adrenal gland                           | Cancer |
| B808600 | carcinoma in situ of ampulla of vater                        | Cancer |
| B805.00 | carcinoma in situ of anal canal                              | Cancer |
| B803500 | carcinoma in situ of appendix                                | Cancer |
| B803600 | carcinoma in situ of ascending colon                         | Cancer |
| B837.00 | carcinoma in situ of bladder                                 | Cancer |
| B802200 | carcinoma in situ of body of stomach                         | Cancer |
| B832.11 | carcinoma in situ of body of uterus                          | Cancer |
| B802000 | carcinoma in situ of cardia of stomach                       | Cancer |
| B831.00 | carcinoma in situ of cervix uteri                            | Cancer |
| B803.00 | carcinoma in situ of colon                                   | Cancer |
| B808500 | carcinoma in situ of common bile duct                        | Cancer |
| B808400 | carcinoma in situ of cystic duct                             | Cancer |
| B803200 | carcinoma in situ of descending colon                        | Cancer |
| B807000 | carcinoma in situ of duodenum                                | Cancer |
| B831000 | carcinoma in situ of endocervix                              | Cancer |
| B832000 | carcinoma in situ of endometrium                             | Cancer |
| B810200 | carcinoma in situ of epiglottis                              | Cancer |
| B81y700 | carcinoma in situ of ethmoidal sinus                         | Cancer |
| B81y400 | carcinoma in situ of eustachian tube                         | Cancer |
| B831100 | carcinoma in situ of exocervix                               | Cancer |
| B8y0.00 | carcinoma in situ of eye                                     | Cancer |
| B833100 | carcinoma in situ of fallopian tube                          | Cancer |
| B800400 | carcinoma in situ of floor of mouth                          | Cancer |
| B802100 | carcinoma in situ of fundus of stomach                       | Cancer |
| B810811 | carcinoma in situ of glottis                                 | Cancer |
| B803000 | carcinoma in situ of hepatic flexure of colon                | Cancer |
| B800900 | carcinoma in situ of hypopharynx                             | Cancer |
| B807200 | carcinoma in situ of ileum                                   | Cancer |
| B808100 | carcinoma in situ of intrahepatic bile ducts                 | Cancer |
| B807100 | carcinoma in situ of jejunum                                 | Cancer |
| B810.00 | carcinoma in situ of larynx                                  | Cancer |
| B800000 | carcinoma in situ of lip                                     | Cancer |
| B808000 | carcinoma in situ of liver                                   | Cancer |
| B812100 | carcinoma in situ of main bronchus                           | Cancer |
| B81y500 | carcinoma in situ of mastoid air cells                       | Cancer |
| B81y600 | carcinoma in situ of maxillary sinus                         | Cancer |
| B807300 | carcinoma in situ of meckel's diverticulum                   | Cancer |
| B81y100 | carcinoma in situ of nasal cavity                            | Cancer |

|         |                                                      |        |
|---------|------------------------------------------------------|--------|
| B800700 | carcinoma in situ of nasopharynx                     | Cancer |
| B800800 | carcinoma in situ of oropharynx                      | Cancer |
| B833000 | carcinoma in situ of ovary                           | Cancer |
| B800600 | carcinoma in situ of palate                          | Cancer |
| B80z000 | carcinoma in situ of pancreas                        | Cancer |
| B8yy200 | carcinoma in situ of parathyroid gland               | Cancer |
| B835.00 | carcinoma in situ of penis                           | Cancer |
| B825800 | carcinoma in situ of perianal skin                   | Cancer |
| B800.12 | carcinoma in situ of pharynx                         | Cancer |
| B8yy300 | carcinoma in situ of pituitary gland                 | Cancer |
| B81y000 | carcinoma in situ of pleura                          | Cancer |
| B834.00 | carcinoma in situ of prostate                        | Cancer |
| B802300 | carcinoma in situ of pyloric antrum                  | Cancer |
| B804000 | carcinoma in situ of rectosigmoid junction           | Cancer |
| B804100 | carcinoma in situ of rectum                          | Cancer |
| B836300 | carcinoma in situ of scrotum                         | Cancer |
| B803300 | carcinoma in situ of sigmoid colon                   | Cancer |
| B825200 | carcinoma in situ of skin of axilla                  | Cancer |
| B825300 | carcinoma in situ of skin of back                    | Cancer |
| B825000 | carcinoma in situ of skin of breast                  | Cancer |
| B825700 | carcinoma in situ of skin of buttock                 | Cancer |
| B823300 | carcinoma in situ of skin of cheek                   | Cancer |
| B823100 | carcinoma in situ of skin of eyebrow                 | Cancer |
| B827400 | carcinoma in situ of skin of foot                    | Cancer |
| B825500 | carcinoma in situ of skin of groin                   | Cancer |
| B826300 | carcinoma in situ of skin of hand                    | Cancer |
| B827000 | carcinoma in situ of skin of hip                     | Cancer |
| B827200 | carcinoma in situ of skin of knee                    | Cancer |
| B820.00 | carcinoma in situ of skin of lip                     | Cancer |
| B824100 | carcinoma in situ of skin of neck                    | Cancer |
| B823400 | carcinoma in situ of skin of nose                    | Cancer |
| B825600 | carcinoma in situ of skin of perineum                | Cancer |
| B826000 | carcinoma in situ of skin of shoulder                | Cancer |
| B827100 | carcinoma in situ of skin of thigh                   | Cancer |
| B82..00 | carcinoma in situ of skin                            | Cancer |
| B81y900 | carcinoma in situ of sphenoidal sinus                | Cancer |
| B80z100 | carcinoma in situ of spleen                          | Cancer |
| B802.00 | carcinoma in situ of stomach                         | Cancer |
| B836000 | carcinoma in situ of testis                          | Cancer |
| B8yy000 | carcinoma in situ of thyroid gland                   | Cancer |
| B800100 | carcinoma in situ of tongue                          | Cancer |
| B811.00 | carcinoma in situ of trachea                         | Cancer |
| B803100 | carcinoma in situ of transverse colon                | Cancer |
| B833200 | carcinoma in situ of vagina                          | Cancer |
| B833300 | carcinoma in situ of vulva                           | Cancer |
| B625300 | letterer-siwe disease of intra-abdominal lymph nodes | Cancer |

|         |                                                          |        |
|---------|----------------------------------------------------------|--------|
| B625600 | letterer-siwe disease of intrapelvic lymph nodes         | Cancer |
| B625200 | letterer-siwe disease of intrathoracic lymph nodes       | Cancer |
| B625800 | letterer-siwe disease of lymph nodes of multiple sites   | Cancer |
| B625700 | letterer-siwe disease of spleen                          | Cancer |
| B623300 | malignant histiocytosis of intra-abdominal lymph nodes   | Cancer |
| B623600 | malignant histiocytosis of intrapelvic lymph nodes       | Cancer |
| B623200 | malignant histiocytosis of intrathoracic lymph nodes     | Cancer |
| B623800 | malignant histiocytosis of lymph nodes of multiple sites | Cancer |
| B623700 | malignant histiocytosis of spleen                        | Cancer |
| B325400 | malignant melanoma of perianal skin                      | Cancer |
| B615700 | hodgkin's disease, mixed cellularity of spleen           | Cancer |
| B614700 | hodgkin's disease, nodular sclerosis of spleen           | Cancer |
| B611600 | hodgkin's granuloma of intrapelvic lymph nodes           | Cancer |
| B611200 | hodgkin's granuloma of intrathoracic lymph nodes         | Cancer |
| B611700 | hodgkin's granuloma of spleen                            | Cancer |
| B610700 | hodgkin's paraganuloma of spleen                         | Cancer |
| B612300 | hodgkin's sarcoma of intra-abdominal lymph nodes         | Cancer |
| B612600 | hodgkin's sarcoma of intrapelvic lymph nodes             | Cancer |
| B612200 | hodgkin's sarcoma of intrathoracic lymph nodes           | Cancer |
| B612700 | hodgkin's sarcoma of spleen                              | Cancer |
| B32..00 | malignant melanoma of skin                               | Cancer |
| B304100 | malignant neoplasm of acromion                           | Cancer |
| B540.00 | malignant neoplasm of adrenal gland                      | Cancer |
| B142.00 | malignant neoplasm of anal canal                         | Cancer |
| B242.00 | malignant neoplasm of anterior mediastinum               | Cancer |
| B545100 | malignant neoplasm of aortic body                        | Cancer |
| B340100 | malignant neoplasm of areola of female breast            | Cancer |
| B350100 | malignant neoplasm of areola of male breast              | Cancer |
| B442.00 | malignant neoplasm of broad ligament                     | Cancer |
| B544.00 | malignant neoplasm of carotid body                       | Cancer |
| B516.00 | malignant neoplasm of cerebellum                         | Cancer |
| B303200 | malignant neoplasm of clavicle                           | Cancer |
| B545200 | malignant neoplasm of coccygeal body                     | Cancer |
| B308600 | malignant neoplasm of cuboid                             | Cancer |
| B161000 | malignant neoplasm of cystic duct                        | Cancer |
| B313100 | malignant neoplasm of diaphragm                          | Cancer |
| B011.00 | malignant neoplasm of dorsal surface of tongue           | Cancer |
| B410.00 | malignant neoplasm of endocervix                         | Cancer |
| B241100 | malignant neoplasm of epicardium                         | Cancer |
| B300000 | malignant neoplasm of ethmoid bone                       | Cancer |
| B411.00 | malignant neoplasm of exocervix                          | Cancer |
| B307000 | malignant neoplasm of femur                              | Cancer |
| B307100 | malignant neoplasm of fibula                             | Cancer |
| B300100 | malignant neoplasm of frontal bone                       | Cancer |
| B545000 | malignant neoplasm of glomus jugulare                    | Cancer |
| B313200 | malignant neoplasm of great vessels                      | Cancer |

|         |                                                  |        |
|---------|--------------------------------------------------|--------|
| B221100 | malignant neoplasm of hilus of lung              | Cancer |
| B306000 | malignant neoplasm of ilium                      | Cancer |
| B151.00 | malignant neoplasm of intrahepatic bile ducts    | Cancer |
| B306100 | malignant neoplasm of ischium                    | Cancer |
| B066.00 | malignant neoplasm of lateral wall of oropharynx | Cancer |
| B221.00 | malignant neoplasm of main bronchus              | Cancer |
| B35..00 | malignant neoplasm of male breast                | Cancer |
| B301.00 | malignant neoplasm of mandible                   | Cancer |
| B300A00 | malignant neoplasm of maxilla                    | Cancer |
| B300300 | malignant neoplasm of nasal bone                 | Cancer |
| B340000 | malignant neoplasm of nipple of female breast    | Cancer |
| B350000 | malignant neoplasm of nipple of male breast      | Cancer |
| B300400 | malignant neoplasm of occipital bone             | Cancer |
| B520100 | malignant neoplasm of optic nerve                | Cancer |
| B443.00 | malignant neoplasm of parametrium                | Cancer |
| B300600 | malignant neoplasm of parietal bone              | Cancer |
| B18y400 | malignant neoplasm of parietal peritoneum        | Cancer |
| B230.00 | malignant neoplasm of parietal pleura            | Cancer |
| B308000 | malignant neoplasm of patella                    | Cancer |
| B18y500 | malignant neoplasm of pelvic peritoneum          | Cancer |
| B180000 | malignant neoplasm of periadrenal tissue         | Cancer |
| B335900 | malignant neoplasm of perianal skin              | Cancer |
| B241300 | malignant neoplasm of pericardium                | Cancer |
| B42..00 | malignant neoplasm of placenta                   | Cancer |
| B243.00 | malignant neoplasm of posterior mediastinum      | Cancer |
| B553100 | malignant neoplasm of presacral region           | Cancer |
| B306200 | malignant neoplasm of pubis                      | Cancer |
| B304300 | malignant neoplasm of radius                     | Cancer |
| B141.00 | malignant neoplasm of rectum                     | Cancer |
| B303000 | malignant neoplasm of rib                        | Cancer |
| B553200 | malignant neoplasm of sacrococcygeal region      | Cancer |
| B304000 | malignant neoplasm of scapula                    | Cancer |
| B337500 | malignant neoplasm of skin of ankle              | Cancer |
| B335700 | malignant neoplasm of skin of back               | Cancer |
| B335200 | malignant neoplasm of skin of breast             | Cancer |
| B335800 | malignant neoplasm of skin of buttock            | Cancer |
| B333100 | malignant neoplasm of skin of chin               | Cancer |
| B333200 | malignant neoplasm of skin of eyebrow            | Cancer |
| B336400 | malignant neoplasm of skin of finger             | Cancer |
| B337700 | malignant neoplasm of skin of foot               | Cancer |
| B333300 | malignant neoplasm of skin of forehead           | Cancer |
| B335500 | malignant neoplasm of skin of groin              | Cancer |
| B336300 | malignant neoplasm of skin of hand               | Cancer |
| B337000 | malignant neoplasm of skin of hip                | Cancer |
| B337200 | malignant neoplasm of skin of knee               | Cancer |
| B330.00 | malignant neoplasm of skin of lip                | Cancer |

|         |                                                  |        |
|---------|--------------------------------------------------|--------|
| B334100 | malignant neoplasm of skin of neck               | Cancer |
| B335600 | malignant neoplasm of skin of perineum           | Cancer |
| B336000 | malignant neoplasm of skin of shoulder           | Cancer |
| B337100 | malignant neoplasm of skin of thigh              | Cancer |
| B337800 | malignant neoplasm of skin of toe                | Cancer |
| B335400 | malignant neoplasm of skin of umbilicus          | Cancer |
| B300700 | malignant neoplasm of sphenoid bone              | Cancer |
| B303100 | malignant neoplasm of sternum                    | Cancer |
| B308100 | malignant neoplasm of talus                      | Cancer |
| B300800 | malignant neoplasm of temporal bone              | Cancer |
| B307200 | malignant neoplasm of tibia                      | Cancer |
| B304400 | malignant neoplasm of ulna                       | Cancer |
| B013.00 | malignant neoplasm of ventral surface of tongue  | Cancer |
| B231.00 | malignant neoplasm of visceral pleura            | Cancer |
| B300C00 | malignant neoplasm of vomer                      | Cancer |
| B300900 | malignant neoplasm of zygomatic bone             | Cancer |
| B587.00 | secondary malignant neoplasm of adrenal gland    | Cancer |
| B581100 | secondary malignant neoplasm of bladder          | Cancer |
| B583000 | secondary malignant neoplasm of brain            | Cancer |
| B575000 | secondary malignant neoplasm of colon            | Cancer |
| B574000 | secondary malignant neoplasm of duodenum         | Cancer |
| B574200 | secondary malignant neoplasm of ileum            | Cancer |
| B574100 | secondary malignant neoplasm of jejunum          | Cancer |
| B580.00 | secondary malignant neoplasm of kidney           | Cancer |
| B577.00 | secondary malignant neoplasm of liver            | Cancer |
| B570.00 | secondary malignant neoplasm of lung             | Cancer |
| B571.00 | secondary malignant neoplasm of mediastinum      | Cancer |
| B586.00 | secondary malignant neoplasm of ovary            | Cancer |
| B58y700 | secondary malignant neoplasm of penis            | Cancer |
| B572.00 | secondary malignant neoplasm of pleura           | Cancer |
| B58y500 | secondary malignant neoplasm of prostate         | Cancer |
| B575100 | secondary malignant neoplasm of rectum           | Cancer |
| B582600 | secondary malignant neoplasm of skin of breast   | Cancer |
| B582100 | secondary malignant neoplasm of skin of face     | Cancer |
| B582200 | secondary malignant neoplasm of skin of neck     | Cancer |
| B582300 | secondary malignant neoplasm of skin of trunk    | Cancer |
| B582.00 | secondary malignant neoplasm of skin             | Cancer |
| B583100 | secondary malignant neoplasm of spinal cord      | Cancer |
| B58y600 | secondary malignant neoplasm of testis           | Cancer |
| B58y900 | secondary malignant neoplasm of tongue           | Cancer |
| B581000 | secondary malignant neoplasm of ureter           | Cancer |
| B581200 | secondary malignant neoplasm of urethra          | Cancer |
| B58y100 | secondary malignant neoplasm of uterus           | Cancer |
| B58y300 | secondary malignant neoplasm of vagina           | Cancer |
| B58y400 | secondary malignant neoplasm of vulva            | Cancer |
| B621300 | mycosis fungoides of intra-abdominal lymph nodes | Cancer |



|         |                                                              |        |
|---------|--------------------------------------------------------------|--------|
| B621600 | mycosis fungoides of intrapelvic lymph nodes                 | Cancer |
| B621200 | mycosis fungoides of intrathoracic lymph nodes               | Cancer |
| B621400 | mycosis fungoides of lymph nodes of axilla and upper limb    | Cancer |
| B621700 | mycosis fungoides of spleen                                  | Cancer |
| B653.00 | myeloid sarcoma                                              | Cancer |
| B561300 | secondary and unspec malig neop ant mediastinal lymph nodes  | Cancer |
| B560800 | secondary and unspec malig neop anterior cervical ln         | Cancer |
| B563.00 | secondary and unspec malig neop axilla and upper limb ln     | Cancer |
| B563z00 | secondary and unspec malig neop axilla and upper limb ln nos | Cancer |
| B563000 | secondary and unspec malig neop axillary lymph nodes         | Cancer |
| B561800 | secondary and unspec malig neop bronchopulmonary lymph nodes | Cancer |
| B565200 | secondary and unspec malig neop circumflex iliac ln          | Cancer |
| B562000 | secondary and unspec malig neop coeliac lymph nodes          | Cancer |
| B562300 | secondary and unspec malig neop common iliac lymph nodes     | Cancer |
| B560900 | secondary and unspec malig neop deep cervical ln             | Cancer |
| B564100 | secondary and unspec malig neop deep inguinal lymph nodes    | Cancer |
| B560400 | secondary and unspec malig neop deep parotid lymph nodes     | Cancer |
| B561200 | secondary and unspec malig neop diaphragmatic lymph nodes    | Cancer |
| B562400 | secondary and unspec malig neop external iliac lymph nodes   | Cancer |
| B565100 | secondary and unspec malig neop inferior epigastric ln       | Cancer |
| B562200 | secondary and unspec malig neop inferior mesenteric ln       | Cancer |
| B561700 | secondary and unspec malig neop inferior tracheobronchial ln | Cancer |
| B563200 | secondary and unspec malig neop infraclavicular lymph nodes  | Cancer |
| B564.00 | secondary and unspec malig neop inguinal and lower limb ln   | Cancer |
| B561100 | secondary and unspec malig neop intercostal lymph nodes      | Cancer |
| B565000 | secondary and unspec malig neop internal iliac lymph nodes   | Cancer |
| B620300 | nodular lymphoma of intra-abdominal lymph nodes              | Cancer |
| B620600 | nodular lymphoma of intrapelvic lymph nodes                  | Cancer |
| B620200 | nodular lymphoma of intrathoracic lymph nodes                | Cancer |
| B561000 | secondary and unspec malig neop internal mammary lymph nodes | Cancer |
| B620800 | nodular lymphoma of lymph nodes of multiple sites            | Cancer |
| B620700 | nodular lymphoma of spleen                                   | Cancer |
| B562z00 | secondary and unspec malig neop intra-abdominal ln nos       | Cancer |
| B562.00 | secondary and unspec malig neop intra-abdominal lymph nodes  | Cancer |
| B565z00 | secondary and unspec malig neop intrapelvic ln nos           | Cancer |
| B565.00 | secondary and unspec malig neop intrapelvic lymph nodes      | Cancer |
| B150.00 | primary malignant neoplasm of liver                          | Cancer |
| B561z00 | secondary and unspec malig neop intrathoracic ln nos         | Cancer |
| B600300 | reticulosarcoma of intra-abdominal lymph nodes               | Cancer |
| B600600 | reticulosarcoma of intrapelvic lymph nodes                   | Cancer |
| B600200 | reticulosarcoma of intrathoracic lymph nodes                 | Cancer |
| B561.00 | secondary and unspec malig neop intrathoracic lymph nodes    | Cancer |
| B600800 | reticulosarcoma of lymph nodes of multiple sites             | Cancer |
| B600700 | reticulosarcoma of spleen                                    | Cancer |
| B560.00 | secondary and unspec malig neop lymph nodes head/face/neck   | Cancer |
| B56y.00 | secondary and unspec malig neop lymph nodes multiple sites   | Cancer |

|         |                                                              |        |
|---------|--------------------------------------------------------------|--------|
| B56z.00 | secondary and unspec malig neop lymph nodes nos              | Cancer |
| B565400 | secondary and unspec malig neop obturator lymph nodes        | Cancer |
| B560600 | secondary and unspec malig neop of facial lymph nodes        | Cancer |
| B564z00 | secondary and unspec malig neop of inguinal and leg ln nos   | Cancer |
| B560000 | secondary and unspec malig neop of superficial parotid ln    | Cancer |
| B561500 | secondary and unspec malig neop paratracheal lymph nodes     | Cancer |
| B563300 | secondary and unspec malig neop pectoral lymph nodes         | Cancer |
| B564200 | secondary and unspec malig neop popliteal lymph nodes        | Cancer |
| B561400 | secondary and unspec malig neop post mediastinal lymph nodes | Cancer |
| B561900 | secondary and unspec malig neop pulmonary lymph nodes        | Cancer |
| B565300 | secondary and unspec malig neop sacral lymph nodes           | Cancer |
| B560500 | secondary and unspec malig neop submandibular lymph nodes    | Cancer |
| B560700 | secondary and unspec malig neop submental lymph nodes        | Cancer |
| B561600 | secondary and unspec malig neop superfic tracheobronchial ln | Cancer |
| B560200 | secondary and unspec malig neop superficial cervical ln      | Cancer |
| B564000 | secondary and unspec malig neop superficial inguinal ln      | Cancer |
| B562100 | secondary and unspec malig neop superficial mesenteric ln    | Cancer |
| B563100 | secondary and unspec malig neop supratrochlear lymph nodes   | Cancer |
| B560100 | secondary and unspec malignant neoplasm mastoid lymph nodes  | Cancer |
| B560300 | secondary and unspec malignant neoplasm occipital lymph node | Cancer |
| B627A00 | diffuse non-hodgkin's large cell lymphoma                    | Cancer |
| B620.11 | reticulosarcoma - follicular or nodular                      | Cancer |
| B600500 | reticulosarcoma of lymph nodes of inguinal region and leg    | Cancer |
| 4M3..00 | breslow depth staging for melanoma                           | Cancer |
| B32y000 | overlapping malignant melanoma of skin                       | Cancer |
| B828000 | melanoma in situ of lip                                      | Cancer |
| B828100 | melanoma in situ of eyelid, including canthus                | Cancer |
| B828700 | melanoma in situ of scalp                                    | Cancer |
| B828400 | melanoma in situ of trunk                                    | Cancer |
| B241400 | mesothelioma of pericardium                                  | Cancer |
| B33z000 | kaposi's sarcoma of skin                                     | Cancer |
| B05z000 | kaposi's sarcoma of palate                                   | Cancer |
| B6z0.00 | kaposi's sarcoma of lymph nodes                              | Cancer |
| B142000 | malignant neoplasm of cloacogenic zone                       | Cancer |
| B181.00 | mesothelioma of peritoneum                                   | Cancer |
| B471.00 | malignant neoplasm of descended testis                       | Cancer |
| B830000 | lobular carcinoma in situ of breast                          | Cancer |
| B830100 | intraductal carcinoma in situ of breast                      | Cancer |
| 1929GL  | glioma                                                       | Cancer |
| BB3C.00 | [m]superficial basal cell carcinoma                          | Cancer |
| BB3D.00 | [m]basal cell carcinoma, nodular                             | Cancer |
| BB3E.00 | [m]basal cell carcinoma, micronodular                        | Cancer |
| B4A..11 | renal malignant neoplasm                                     | Cancer |
| BB3F.00 | [m]basal cell carcinoma, infiltrative                        | Cancer |
| BB3G.00 | [m]pigmented basal cell carcinoma                            | Cancer |
| BBP3.11 | [m]sarcomatoid mesothelioma                                  | Cancer |

|         |                                                             |        |
|---------|-------------------------------------------------------------|--------|
| B49..00 | malignant neoplasm of urinary bladder                       | Cancer |
| B61..11 | hodgkin lymphoma                                            | Cancer |
| B618.00 | nodular sclerosis classical hodgkin lymphoma                | Cancer |
| B619.00 | mixed cellularity classical hodgkin lymphoma                | Cancer |
| B61C.00 | other classical hodgkin lymphoma                            | Cancer |
| B61z.11 | hodgkin lymphoma nos                                        | Cancer |
| B628.00 | follicular lymphoma                                         | Cancer |
| B628000 | follicular lymphoma grade 1                                 | Cancer |
| B628100 | follicular lymphoma grade 2                                 | Cancer |
| B628200 | follicular lymphoma grade 3                                 | Cancer |
| B628600 | cutaneous follicle centre lymphoma                          | Cancer |
| B628700 | other types of follicular lymphoma                          | Cancer |
| B62A.00 | sarcoma of dendritic cells                                  | Cancer |
| B62E200 | anaplastic large cell lymphoma, alk-negative                | Cancer |
| B62E300 | cutaneous t-cell lymphoma                                   | Cancer |
| B62E700 | subcutaneous panniculitic t-cell lymphoma                   | Cancer |
| B62E800 | blastic nk-cell lymphoma                                    | Cancer |
| B62Ew00 | other mature t/nk-cell lymphoma                             | Cancer |
| B62F.00 | nonfollicular lymphoma                                      | Cancer |
| B62F000 | small cell b-cell lymphoma                                  | Cancer |
| B64y500 | adult t-cell lymphoma/leukaemia (htlv-1-associated)         | Cancer |
| B630400 | solitary plasmacytoma                                       | Cancer |
| BB1P.00 | [m]non-small cell carcinoma                                 | Cancer |
| 4K2M.00 | crv smr - hi grade dyskaryosis? invasive squamous carcinoma | Cancer |
| B627E00 | diffuse large b-cell lymphoma                               | Cancer |
| B650.00 | acute myeloid leukaemia                                     | Cancer |
| B803400 | carcinoma in situ of caecum                                 | Cancer |
| B801.00 | carcinoma in situ of oesophagus                             | Cancer |
| B641.00 | chronic lymphoid leukaemia                                  | Cancer |
| B651.00 | chronic myeloid leukaemia                                   | Cancer |
| B670.11 | di guglielmo's disease                                      | Cancer |
| B631.00 | plasma cell leukaemia                                       | Cancer |
| B64y100 | prolymphocytic leukaemia                                    | Cancer |
| B62E.00 | t/nk-cell lymphoma                                          | Cancer |
| B628300 | follicular lymphoma grade 3a                                | Cancer |
| B628400 | follicular lymphoma grade 3b                                | Cancer |
| B33..11 | basal cell carcinoma                                        | Cancer |
| BBGM.00 | [m]dermatofibrosarcoma nos                                  | Cancer |
| BBK3100 | [m]rhabdomyosarcoma nos                                     | Cancer |
| BBgM.00 | [m]malignant lymphoma, small cleaved cell, diffuse          | Cancer |
| BBj6.00 | [m]hodgkin's disease, nodular sclerosis nos                 | Cancer |
| BBm1.00 | [m]malignant histiocytosis                                  | Cancer |
| BBm1.11 | [m]malignant reticulosis                                    | Cancer |
| B585000 | pathological fracture due to metastatic bone disease        | Cancer |
| B30z000 | osteosarcoma                                                | Cancer |
| B617.00 | nodular lymphocyte predominant hodgkin lymphoma             | Cancer |

|         |                                                             |        |
|---------|-------------------------------------------------------------|--------|
| B62E100 | anaplastic large cell lymphoma, alk-positive                | Cancer |
| B62F200 | lymphoblastic (diffuse) lymphoma                            | Cancer |
| C333011 | waldenstrom macroglobulinaemia                              | Cancer |
| B62F.11 | non-follicular lymphoma                                     | Cancer |
| 4D56.00 | pleural fluid: malignant cells                              | Cancer |
| B630200 | plasmacytoma nos                                            | Cancer |
| B182.00 | overlapping malign lesion of retroperitoneum and peritoneum | Cancer |
| B151100 | malignant neoplasm of interlobular biliary canals           | Cancer |
| B300B00 | malignant neoplasm of turbinate                             | Cancer |
| B062200 | malignant neoplasm of palatoglossal arch                    | Cancer |
| 1425000 | h/o malignant melanoma                                      | Cancer |
| B660.00 | acute monocytic leukaemia                                   | Cancer |
| B62E900 | angioimmunoblastic t-cell lymphoma                          | Cancer |
| B306500 | malignant sacral teratoma                                   | Cancer |
| 4F32.00 | ascitic fluid: malignant cells                              | Cancer |
| B151200 | malignant neoplasm of intrahepatic biliary passages         | Cancer |
| B6y0.00 | myeloproliferative disorder                                 | Cancer |
| B62x200 | peripheral t-cell lymphoma                                  | Cancer |
| B62D.00 | histiocytic sarcoma                                         | Cancer |
| B8...00 | carcinoma in situ                                           | Cancer |
| B616.00 | hodgkin's disease, lymphocytic depletion                    | Cancer |
| B602.00 | burkitt's lymphoma                                          | Cancer |
| B621.00 | mycosis fungoides                                           | Cancer |
| B612.00 | hodgkin's sarcoma                                           | Cancer |
| B615.00 | hodgkin's disease, mixed cellularity                        | Cancer |
| B61..00 | hodgkin's disease                                           | Cancer |
| B611.00 | hodgkin's granuloma                                         | Cancer |
| B51..00 | malignant neoplasm of brain                                 | Cancer |
| 4M74.00 | clark melanoma level 5                                      | Cancer |
| 7G03J00 | excision of melanoma                                        | Cancer |
| 7H62z00 | excision or biopsy of lymph node nos                        | Cancer |
| B627.11 | non-hodgkin lymphoma                                        | Cancer |
| A789600 | hiv disease resulting in burkitt's lymphoma                 | Cancer |
| A789800 | hiv disease resulting in multiple malignant neoplasms       | Cancer |
| B61B.00 | lymphocyte-rich classical hodgkin lymphoma                  | Cancer |
| B627G00 | mediastinal (thymic) large b-cell lymphoma                  | Cancer |
| B62E500 | hepatosplenic t-cell lymphoma                               | Cancer |
| B000100 | malignant neoplasm of upper lip, lipstick area              | Cancer |
| B000z00 | malignant neoplasm of upper lip, vermilion border nos       | Cancer |
| B001000 | malignant neoplasm of lower lip, external                   | Cancer |
| B001z00 | malignant neoplasm of lower lip, vermilion border nos       | Cancer |
| B002300 | malignant neoplasm of upper lip, oral aspect                | Cancer |
| B002.00 | malignant neoplasm of upper lip, inner aspect               | Cancer |
| B002200 | malignant neoplasm of upper lip, mucosa                     | Cancer |
| B002100 | malignant neoplasm of upper lip, frenulum                   | Cancer |
| B002z00 | malignant neoplasm of upper lip, inner aspect nos           | Cancer |

|         |                                                              |        |
|---------|--------------------------------------------------------------|--------|
| B003000 | malignant neoplasm of lower lip, buccal aspect               | Cancer |
| B003100 | malignant neoplasm of lower lip, frenulum                    | Cancer |
| B003z00 | malignant neoplasm of lower lip, inner aspect nos            | Cancer |
| B004.00 | malignant neoplasm of lip unspecified, inner aspect          | Cancer |
| B004100 | malignant neoplasm of lip unspecified, frenulum              | Cancer |
| B004200 | malignant neoplasm of lip unspecified, mucosa                | Cancer |
| B004300 | malignant neoplasm of lip, oral aspect                       | Cancer |
| B004z00 | malignant neoplasm of lip, inner aspect nos                  | Cancer |
| B006.00 | malignant neoplasm of overlapping lesion of lip              | Cancer |
| B00y.00 | malignant neoplasm of other sites of lip                     | Cancer |
| B00z.00 | malignant neoplasm of vermilion border of lip unspecified    | Cancer |
| B00z000 | malignant neoplasm of lip, unspecified, external             | Cancer |
| B00z100 | malignant neoplasm of lip, unspecified, lipstick area        | Cancer |
| B00zz00 | malignant neoplasm of lip, vermilion border nos              | Cancer |
| B010000 | malignant neoplasm of base of tongue dorsal surface          | Cancer |
| B010z00 | malignant neoplasm of fixed part of tongue nos               | Cancer |
| B011000 | malignant neoplasm of anterior 2/3 of tongue dorsal surface  | Cancer |
| B011100 | malignant neoplasm of midline of tongue                      | Cancer |
| B011z00 | malignant neoplasm of dorsum of tongue nos                   | Cancer |
| B012.00 | malignant neoplasm of tongue, tip and lateral border         | Cancer |
| B013000 | malignant neoplasm of anterior 2/3 of tongue ventral surface | Cancer |
| B013100 | malignant neoplasm of frenulum linguae                       | Cancer |
| B013z00 | malignant neoplasm of ventral tongue surface nos             | Cancer |
| B014.00 | malignant neoplasm of anterior 2/3 of tongue unspecified     | Cancer |
| B015.00 | malignant neoplasm of tongue, junctional zone                | Cancer |
| B01y.00 | malignant neoplasm of other sites of tongue                  | Cancer |
| B01z.00 | malignant neoplasm of tongue nos                             | Cancer |
| B02y.00 | malignant neoplasm of other major salivary glands            | Cancer |
| B02z.00 | malignant neoplasm of major salivary gland nos               | Cancer |
| B03y.00 | malignant neoplasm of other sites of gum                     | Cancer |
| B03z.00 | malignant neoplasm of gum nos                                | Cancer |
| B040.00 | malignant neoplasm of anterior portion of floor of mouth     | Cancer |
| B041.00 | malignant neoplasm of lateral portion of floor of mouth      | Cancer |
| B04y.00 | malignant neoplasm of other sites of floor of mouth          | Cancer |
| B04z.00 | malignant neoplasm of floor of mouth nos                     | Cancer |
| B05..00 | malignant neoplasm of other and unspecified parts of mouth   | Cancer |
| B051.00 | malignant neoplasm of vestibule of mouth                     | Cancer |
| B051000 | malignant neoplasm of upper buccal sulcus                    | Cancer |
| B051100 | malignant neoplasm of lower buccal sulcus                    | Cancer |
| B051200 | malignant neoplasm of upper labial sulcus                    | Cancer |
| B051300 | malignant neoplasm of lower labial sulcus                    | Cancer |
| B051z00 | malignant neoplasm of vestibule of mouth nos                 | Cancer |
| B055.00 | malignant neoplasm of palate unspecified                     | Cancer |
| B055000 | malignant neoplasm of junction of hard and soft palate       | Cancer |
| B055z00 | malignant neoplasm of palate nos                             | Cancer |
| B057.00 | overlapping lesion of other and unspecified parts of mouth   | Cancer |

|         |                                                              |        |
|---------|--------------------------------------------------------------|--------|
| B05y.00 | malignant neoplasm of other specified mouth parts            | Cancer |
| B05z.00 | malignant neoplasm of mouth nos                              | Cancer |
| B060z00 | malignant neoplasm tonsil nos                                | Cancer |
| B062000 | malignant neoplasm of faucial pillar                         | Cancer |
| B062.00 | malignant neoplasm of tonsillar pillar                       | Cancer |
| B062z00 | malignant neoplasm of tonsillar fossa nos                    | Cancer |
| B064.00 | malignant neoplasm of anterior epiglottis                    | Cancer |
| B064000 | malignant neoplasm of epiglottis, free border                | Cancer |
| B064100 | malignant neoplasm of glossoepiglottic fold                  | Cancer |
| B064z00 | malignant neoplasm of anterior epiglottis nos                | Cancer |
| B065.00 | malignant neoplasm of junctional region of epiglottis        | Cancer |
| B067.00 | malignant neoplasm of posterior wall of oropharynx           | Cancer |
| B06y.00 | malignant neoplasm of oropharynx, other specified sites      | Cancer |
| B06yz00 | malignant neoplasm of other specified site of oropharynx nos | Cancer |
| B06z.00 | malignant neoplasm of oropharynx nos                         | Cancer |
| B07..00 | malignant neoplasm of nasopharynx                            | Cancer |
| B071.00 | malignant neoplasm of posterior wall of nasopharynx          | Cancer |
| B071100 | malignant neoplasm of pharyngeal tonsil                      | Cancer |
| B071000 | malignant neoplasm of adenoid                                | Cancer |
| B071z00 | malignant neoplasm of posterior wall of nasopharynx nos      | Cancer |
| B072000 | malignant neoplasm of pharyngeal recess                      | Cancer |
| B072100 | malignant neoplasm of opening of auditory tube               | Cancer |
| B072z00 | malignant neoplasm of lateral wall of nasopharynx nos        | Cancer |
| B073.00 | malignant neoplasm of anterior wall of nasopharynx           | Cancer |
| B073000 | malignant neoplasm of floor of nasopharynx                   | Cancer |
| B073100 | malignant neoplasm of nasopharyngeal soft palate surface     | Cancer |
| B073z00 | malignant neoplasm of anterior wall of nasopharynx nos       | Cancer |
| B07y.00 | malignant neoplasm of other specified site of nasopharynx    | Cancer |
| B07z.00 | malignant neoplasm of nasopharynx nos                        | Cancer |
| B083.00 | malignant neoplasm of posterior pharynx                      | Cancer |
| B08y.00 | malignant neoplasm of other specified hypopharyngeal site    | Cancer |
| B08z.00 | malignant neoplasm of hypopharynx nos                        | Cancer |
| B0z0.00 | malignant neoplasm of pharynx unspecified                    | Cancer |
| B0z1.00 | malignant neoplasm of waldeyer's ring                        | Cancer |
| B0zz.00 | malignant neoplasm of lip, oral cavity and pharynx nos       | Cancer |
| B100.00 | malignant neoplasm of cervical oesophagus                    | Cancer |
| B101.00 | malignant neoplasm of thoracic oesophagus                    | Cancer |
| B102.00 | malignant neoplasm of abdominal oesophagus                   | Cancer |
| B103.00 | malignant neoplasm of upper third of oesophagus              | Cancer |
| B104.00 | malignant neoplasm of middle third of oesophagus             | Cancer |
| B105.00 | malignant neoplasm of lower third of oesophagus              | Cancer |
| B10y.00 | malignant neoplasm of other specified part of oesophagus     | Cancer |
| B110.00 | malignant neoplasm of cardia of stomach                      | Cancer |
| B110000 | malignant neoplasm of cardiac orifice of stomach             | Cancer |
| B110111 | malignant neoplasm of gastro-oesophageal junction            | Cancer |
| B110100 | malignant neoplasm of cardio-oesophageal junction of stomach | Cancer |

|         |                                                              |        |
|---------|--------------------------------------------------------------|--------|
| B110z00 | malignant neoplasm of cardia of stomach nos                  | Cancer |
| B111.00 | malignant neoplasm of pylorus of stomach                     | Cancer |
| B111100 | malignant neoplasm of pyloric canal of stomach               | Cancer |
| B111z00 | malignant neoplasm of pylorus of stomach nos                 | Cancer |
| B112.00 | malignant neoplasm of pyloric antrum of stomach              | Cancer |
| B113.00 | malignant neoplasm of fundus of stomach                      | Cancer |
| B114.00 | malignant neoplasm of body of stomach                        | Cancer |
| B115.00 | malignant neoplasm of lesser curve of stomach unspecified    | Cancer |
| B116.00 | malignant neoplasm of greater curve of stomach unspecified   | Cancer |
| B11y.00 | malignant neoplasm of other specified site of stomach        | Cancer |
| B11y000 | malignant neoplasm of anterior wall of stomach nec           | Cancer |
| B11y100 | malignant neoplasm of posterior wall of stomach nec          | Cancer |
| B11yz00 | malignant neoplasm of other specified site of stomach nos    | Cancer |
| B11z.00 | malignant neoplasm of stomach nos                            | Cancer |
| B123.00 | malignant neoplasm of meckel's diverticulum                  | Cancer |
| B12z.00 | malignant neoplasm of small intestine nos                    | Cancer |
| B138.00 | malignant neoplasm, overlapping lesion of colon              | Cancer |
| B13y.00 | malignant neoplasm of other specified sites of colon         | Cancer |
| B14..00 | malignant neoplasm of rectum, rectosigmoid junction and anus | Cancer |
| B143.00 | malignant neoplasm of anus unspecified                       | Cancer |
| B15..00 | malignant neoplasm of liver and intrahepatic bile ducts      | Cancer |
| B150000 | primary carcinoma of liver                                   | Cancer |
| B150z00 | primary malignant neoplasm of liver nos                      | Cancer |
| B151000 | malignant neoplasm of interlobular bile ducts                | Cancer |
| B151300 | malignant neoplasm of intrahepatic canaliculi                | Cancer |
| B151400 | malignant neoplasm of intrahepatic gall duct                 | Cancer |
| B151z00 | malignant neoplasm of intrahepatic bile ducts nos            | Cancer |
| B152.00 | malignant neoplasm of liver unspecified                      | Cancer |
| B15z.00 | malignant neoplasm of liver and intrahepatic bile ducts nos  | Cancer |
| B161100 | malignant neoplasm of hepatic duct                           | Cancer |
| B161300 | malignant neoplasm of sphincter of oddi                      | Cancer |
| B161z00 | malignant neoplasm of extrahepatic bile ducts nos            | Cancer |
| B171.00 | malignant neoplasm of body of pancreas                       | Cancer |
| B172.00 | malignant neoplasm of tail of pancreas                       | Cancer |
| B173.00 | malignant neoplasm of pancreatic duct                        | Cancer |
| B174.00 | malignant neoplasm of islets of langerhans                   | Cancer |
| B17y.00 | malignant neoplasm of other specified sites of pancreas      | Cancer |
| B17y000 | malignant neoplasm of ectopic pancreatic tissue              | Cancer |
| B17yz00 | malignant neoplasm of specified site of pancreas nos         | Cancer |
| B17z.00 | malignant neoplasm of pancreas nos                           | Cancer |
| B18..00 | malignant neoplasm of retroperitoneum and peritoneum         | Cancer |
| B180100 | malignant neoplasm of perinephric tissue                     | Cancer |
| B180200 | malignant neoplasm of retrocaecal tissue                     | Cancer |
| B180z00 | malignant neoplasm of retroperitoneum nos                    | Cancer |
| B18y.00 | malignant neoplasm of specified parts of peritoneum          | Cancer |
| B18y000 | malignant neoplasm of mesocolon                              | Cancer |

|         |                                                             |        |
|---------|-------------------------------------------------------------|--------|
| B18y100 | malignant neoplasm of mesocaecum                            | Cancer |
| B18y200 | malignant neoplasm of mesorectum                            | Cancer |
| B18y600 | malignant neoplasm of the pouch of douglas                  | Cancer |
| B18yz00 | malignant neoplasm of specified parts of peritoneum nos     | Cancer |
| B18z.00 | malignant neoplasm of retroperitoneum and peritoneum nos    | Cancer |
| B1z0.00 | malignant neoplasm of intestinal tract, part unspecified    | Cancer |
| B1z1.00 | malignant neoplasm of spleen nec                            | Cancer |
| B1z1000 | angiosarcoma of spleen                                      | Cancer |
| B1z1100 | fibrosarcoma of spleen                                      | Cancer |
| B1z1z00 | malignant neoplasm of spleen nos                            | Cancer |
| B1z2.00 | malignant neoplasm, overlapping lesion of digestive system  | Cancer |
| B1zz.00 | malignant neoplasm of digestive tract and peritoneum nos    | Cancer |
| B200000 | malignant neoplasm of cartilage of nose                     | Cancer |
| B200100 | malignant neoplasm of nasal conchae                         | Cancer |
| B200300 | malignant neoplasm of vestibule of nose                     | Cancer |
| B200z00 | malignant neoplasm of nasal cavities nos                    | Cancer |
| B201000 | malignant neoplasm of auditory (eustachian) tube            | Cancer |
| B201100 | malignant neoplasm of tympanic cavity                       | Cancer |
| B201200 | malignant neoplasm of tympanic antrum                       | Cancer |
| B206.00 | malignant neoplasm, overlapping lesion of accessory sinuses | Cancer |
| B20z.00 | malignant neoplasm of accessory sinus nos                   | Cancer |
| B210.00 | malignant neoplasm of glottis                               | Cancer |
| B211.00 | malignant neoplasm of supraglottis                          | Cancer |
| B213000 | malignant neoplasm of arytenoid cartilage                   | Cancer |
| B213100 | malignant neoplasm of cricoid cartilage                     | Cancer |
| B213200 | malignant neoplasm of cuneiform cartilage                   | Cancer |
| B213300 | malignant neoplasm of thyroid cartilage                     | Cancer |
| B213z00 | malignant neoplasm of laryngeal cartilage nos               | Cancer |
| B21y.00 | malignant neoplasm of larynx, other specified site          | Cancer |
| B21z.00 | malignant neoplasm of larynx nos                            | Cancer |
| B22..00 | malignant neoplasm of trachea, bronchus and lung            | Cancer |
| B220000 | malignant neoplasm of cartilage of trachea                  | Cancer |
| B220100 | malignant neoplasm of mucosa of trachea                     | Cancer |
| B220z00 | malignant neoplasm of trachea nos                           | Cancer |
| B221000 | malignant neoplasm of carina of bronchus                    | Cancer |
| B221z00 | malignant neoplasm of main bronchus nos                     | Cancer |
| B222000 | malignant neoplasm of upper lobe bronchus                   | Cancer |
| B222100 | malignant neoplasm of upper lobe of lung                    | Cancer |
| B222z00 | malignant neoplasm of upper lobe, bronchus or lung nos      | Cancer |
| B223.00 | malignant neoplasm of middle lobe, bronchus or lung         | Cancer |
| B223000 | malignant neoplasm of middle lobe bronchus                  | Cancer |
| B223100 | malignant neoplasm of middle lobe of lung                   | Cancer |
| B223z00 | malignant neoplasm of middle lobe, bronchus or lung nos     | Cancer |
| B224.00 | malignant neoplasm of lower lobe, bronchus or lung          | Cancer |
| B224000 | malignant neoplasm of lower lobe bronchus                   | Cancer |
| B224100 | malignant neoplasm of lower lobe of lung                    | Cancer |



|         |                                                           |        |
|---------|-----------------------------------------------------------|--------|
| B224z00 | malignant neoplasm of lower lobe, bronchus or lung nos    | Cancer |
| B22y.00 | malignant neoplasm of other sites of bronchus or lung     | Cancer |
| B23y.00 | malignant neoplasm of other specified pleura              | Cancer |
| B23z.00 | malignant neoplasm of pleura nos                          | Cancer |
| B24..00 | malignant neoplasm of thymus, heart and mediastinum       | Cancer |
| B241z00 | malignant neoplasm of heart nos                           | Cancer |
| B24z.00 | malignant neoplasm of heart, thymus and mediastinum nos   | Cancer |
| B2zy.00 | malignant neoplasm of other site of respiratory tract     | Cancer |
| B2zz.00 | malignant neoplasm of respiratory tract nos               | Cancer |
| B300.00 | malignant neoplasm of bones of skull and face             | Cancer |
| B300200 | malignant neoplasm of malar bone                          | Cancer |
| B300500 | malignant neoplasm of orbital bone                        | Cancer |
| B300z00 | malignant neoplasm of bones of skull and face nos         | Cancer |
| B302000 | malignant neoplasm of cervical vertebra                   | Cancer |
| B302100 | malignant neoplasm of thoracic vertebra                   | Cancer |
| B302200 | malignant neoplasm of lumbar vertebra                     | Cancer |
| B302z00 | malignant neoplasm of vertebral column nos                | Cancer |
| B303.00 | malignant neoplasm of ribs, sternum and clavicle          | Cancer |
| B303300 | malignant neoplasm of costal cartilage                    | Cancer |
| B303500 | malignant neoplasm of xiphoid process                     | Cancer |
| B303z00 | malignant neoplasm of rib, sternum and clavicle nos       | Cancer |
| B304.00 | malignant neoplasm of scapula and long bones of upper arm | Cancer |
| B304200 | malignant neoplasm of humerus                             | Cancer |
| B305000 | malignant neoplasm of carpal bone - scaphoid              | Cancer |
| B305100 | malignant neoplasm of carpal bone - lunate                | Cancer |
| B305200 | malignant neoplasm of carpal bone - triquetrum            | Cancer |
| B305300 | malignant neoplasm of carpal bone - pisiform              | Cancer |
| B305400 | malignant neoplasm of carpal bone - trapezium             | Cancer |
| B305500 | malignant neoplasm of carpal bone - trapezoid             | Cancer |
| B305600 | malignant neoplasm of carpal bone - capitate              | Cancer |
| B305700 | malignant neoplasm of carpal bone - hamate                | Cancer |
| B305800 | malignant neoplasm of first metacarpal bone               | Cancer |
| B305900 | malignant neoplasm of second metacarpal bone              | Cancer |
| B305A00 | malignant neoplasm of third metacarpal bone               | Cancer |
| B305C00 | malignant neoplasm of fifth metacarpal bone               | Cancer |
| B305D00 | malignant neoplasm of phalanges of hand                   | Cancer |
| B305z00 | malignant neoplasm of hand bones nos                      | Cancer |
| B306.00 | malignant neoplasm of pelvic bones, sacrum and coccyx     | Cancer |
| B306300 | malignant neoplasm of sacral vertebra                     | Cancer |
| B306400 | malignant neoplasm of coccygeal vertebra                  | Cancer |
| B306z00 | malignant neoplasm of pelvis, sacrum or coccyx nos        | Cancer |
| B307.00 | malignant neoplasm of long bones of leg                   | Cancer |
| B307z00 | malignant neoplasm of long bones of leg nos               | Cancer |
| B308200 | malignant neoplasm of calcaneum                           | Cancer |
| B308300 | malignant neoplasm of medial cuneiform                    | Cancer |
| B308400 | malignant neoplasm of intermediate cuneiform              | Cancer |

|         |                                                              |        |
|---------|--------------------------------------------------------------|--------|
| B308500 | malignant neoplasm of lateral cuneiform                      | Cancer |
| B308700 | malignant neoplasm of navicular                              | Cancer |
| B308800 | malignant neoplasm of first metatarsal bone                  | Cancer |
| B308900 | malignant neoplasm of second metatarsal bone                 | Cancer |
| B308A00 | malignant neoplasm of third metatarsal bone                  | Cancer |
| B308B00 | malignant neoplasm of fourth metatarsal bone                 | Cancer |
| B308C00 | malignant neoplasm of fifth metatarsal bone                  | Cancer |
| B308D00 | malignant neoplasm of phalanges of foot                      | Cancer |
| B308z00 | malignant neoplasm of short bones of leg nos                 | Cancer |
| B30z.00 | malignant neoplasm of bone and articular cartilage nos       | Cancer |
| B31..00 | malignant neoplasm of connective and other soft tissue       | Cancer |
| B310300 | malignant neoplasm of cartilage of ear                       | Cancer |
| B310400 | malignant neoplasm of tarsus of eyelid                       | Cancer |
| B310500 | malignant neoplasm soft tissues of cervical spine            | Cancer |
| B311000 | malignant neoplasm of connective and soft tissue of shoulder | Cancer |
| B311100 | malignant neoplasm of connective and soft tissue, upper arm  | Cancer |
| B311200 | malignant neoplasm of connective and soft tissue of fore-arm | Cancer |
| B311300 | malignant neoplasm of connective and soft tissue of hand     | Cancer |
| B311400 | malignant neoplasm of connective and soft tissue of finger   | Cancer |
| B311500 | malignant neoplasm of connective and soft tissue of thumb    | Cancer |
| B312000 | malignant neoplasm of connective and soft tissue of hip      | Cancer |
| B312400 | malignant neoplasm of connective and soft tissue of foot     | Cancer |
| B312500 | malignant neoplasm of connective and soft tissue of toe      | Cancer |
| B313.00 | malignant neoplasm of connective and soft tissue of thorax   | Cancer |
| B313000 | malignant neoplasm of connective and soft tissue of axilla   | Cancer |
| B314.00 | malignant neoplasm of connective and soft tissue of abdomen  | Cancer |
| B315.00 | malignant neoplasm of connective and soft tissue of pelvis   | Cancer |
| B315000 | malignant neoplasm of connective and soft tissue of buttock  | Cancer |
| B315200 | malignant neoplasm of connective and soft tissue of perineum | Cancer |
| B31z.00 | malignant neoplasm of connective and soft tissue, site nos   | Cancer |
| B31z000 | kaposi's sarcoma of soft tissue                              | Cancer |
| B320.00 | malignant melanoma of lip                                    | Cancer |
| B322.00 | malignant melanoma of ear and external auricular canal       | Cancer |
| B322000 | malignant melanoma of auricle (ear)                          | Cancer |
| B322100 | malignant melanoma of external auditory meatus               | Cancer |
| B322z00 | malignant melanoma of ear and external auricular canal nos   | Cancer |
| B323.00 | malignant melanoma of other and unspecified parts of face    | Cancer |
| B323100 | malignant melanoma of chin                                   | Cancer |
| B323300 | malignant melanoma of forehead                               | Cancer |
| B323500 | malignant melanoma of temple                                 | Cancer |
| B323z00 | malignant melanoma of face nos                               | Cancer |
| B324.00 | malignant melanoma of scalp and neck                         | Cancer |
| B324000 | malignant melanoma of scalp                                  | Cancer |
| B324100 | malignant melanoma of neck                                   | Cancer |
| B324z00 | malignant melanoma of scalp and neck nos                     | Cancer |
| B325.00 | malignant melanoma of trunk (excluding scrotum)              | Cancer |

|         |                                                             |        |
|---------|-------------------------------------------------------------|--------|
| B325000 | malignant melanoma of axilla                                | Cancer |
| B325100 | malignant melanoma of breast                                | Cancer |
| B325200 | malignant melanoma of buttock                               | Cancer |
| B325300 | malignant melanoma of groin                                 | Cancer |
| B325500 | malignant melanoma of perineum                              | Cancer |
| B325600 | malignant melanoma of umbilicus                             | Cancer |
| B325z00 | malignant melanoma of trunk, excluding scrotum, nos         | Cancer |
| B326000 | malignant melanoma of shoulder                              | Cancer |
| B326100 | malignant melanoma of upper arm                             | Cancer |
| B326200 | malignant melanoma of fore-arm                              | Cancer |
| B326300 | malignant melanoma of hand                                  | Cancer |
| B326400 | malignant melanoma of finger                                | Cancer |
| B326500 | malignant melanoma of thumb                                 | Cancer |
| B326z00 | malignant melanoma of upper limb or shoulder nos            | Cancer |
| B327.00 | malignant melanoma of lower limb and hip                    | Cancer |
| B327000 | malignant melanoma of hip                                   | Cancer |
| B327100 | malignant melanoma of thigh                                 | Cancer |
| B327200 | malignant melanoma of knee                                  | Cancer |
| B327300 | malignant melanoma of popliteal fossa area                  | Cancer |
| B327400 | malignant melanoma of lower leg                             | Cancer |
| B327500 | malignant melanoma of ankle                                 | Cancer |
| B327600 | malignant melanoma of heel                                  | Cancer |
| B327700 | malignant melanoma of foot                                  | Cancer |
| B327800 | malignant melanoma of toe                                   | Cancer |
| B327900 | malignant melanoma of great toe                             | Cancer |
| B327z00 | malignant melanoma of lower limb or hip nos                 | Cancer |
| B32y.00 | malignant melanoma of other specified skin site             | Cancer |
| B32z.00 | malignant melanoma of skin nos                              | Cancer |
| B33..14 | malignant neoplasm of sebaceous gland                       | Cancer |
| B332000 | malignant neoplasm of skin of auricle (ear)                 | Cancer |
| B332100 | malignant neoplasm of skin of external auditory meatus      | Cancer |
| B333000 | malignant neoplasm of skin of cheek, external               | Cancer |
| B333400 | malignant neoplasm of skin of nose (external)               | Cancer |
| B333500 | malignant neoplasm of skin of temple                        | Cancer |
| B334.00 | malignant neoplasm of scalp and skin of neck                | Cancer |
| B334000 | malignant neoplasm of scalp                                 | Cancer |
| B334z00 | malignant neoplasm of scalp or skin of neck nos             | Cancer |
| B335.00 | malignant neoplasm of skin of trunk, excluding scrotum      | Cancer |
| B335000 | malignant neoplasm of skin of axillary fold                 | Cancer |
| B335100 | malignant neoplasm of skin of chest, excluding breast       | Cancer |
| B335300 | malignant neoplasm of skin of abdominal wall                | Cancer |
| B335z00 | malignant neoplasm of skin of trunk, excluding scrotum, nos | Cancer |
| B336.00 | malignant neoplasm of skin of upper limb and shoulder       | Cancer |
| B336100 | malignant neoplasm of skin of upper arm                     | Cancer |
| B336200 | malignant neoplasm of skin of fore-arm                      | Cancer |
| B336500 | malignant neoplasm of skin of thumb                         | Cancer |

|         |                                                             |        |
|---------|-------------------------------------------------------------|--------|
| B336z00 | malignant neoplasm of skin of upper limb or shoulder nos    | Cancer |
| B337.00 | malignant neoplasm of skin of lower limb and hip            | Cancer |
| B337300 | malignant neoplasm of skin of popliteal fossa area          | Cancer |
| B337400 | malignant neoplasm of skin of lower leg                     | Cancer |
| B337600 | malignant neoplasm of skin of heel                          | Cancer |
| B337900 | malignant neoplasm of skin of great toe                     | Cancer |
| B337z00 | malignant neoplasm of skin of lower limb or hip nos         | Cancer |
| B33y.00 | malignant neoplasm of other specified skin sites            | Cancer |
| B33z.00 | malignant neoplasm of skin nos                              | Cancer |
| B340.00 | malignant neoplasm of nipple and areola of female breast    | Cancer |
| B340z00 | malignant neoplasm of nipple or areola of female breast nos | Cancer |
| B341.00 | malignant neoplasm of central part of female breast         | Cancer |
| B342.00 | malignant neoplasm of upper-inner quadrant of female breast | Cancer |
| B343.00 | malignant neoplasm of lower-inner quadrant of female breast | Cancer |
| B344.00 | malignant neoplasm of upper-outer quadrant of female breast | Cancer |
| B345.00 | malignant neoplasm of lower-outer quadrant of female breast | Cancer |
| B346.00 | malignant neoplasm of axillary tail of female breast        | Cancer |
| B347.00 | malignant neoplasm, overlapping lesion of breast            | Cancer |
| B34y.00 | malignant neoplasm of other site of female breast           | Cancer |
| B34y000 | malignant neoplasm of ectopic site of female breast         | Cancer |
| B34yz00 | malignant neoplasm of other site of female breast nos       | Cancer |
| B34z.00 | malignant neoplasm of female breast nos                     | Cancer |
| B350.00 | malignant neoplasm of nipple and areola of male breast      | Cancer |
| B350z00 | malignant neoplasm of nipple or areola of male breast nos   | Cancer |
| B35z.00 | malignant neoplasm of other site of male breast             | Cancer |
| B35z000 | malignant neoplasm of ectopic site of male breast           | Cancer |
| B35zz00 | malignant neoplasm of male breast nos                       | Cancer |
| B40..00 | malignant neoplasm of uterus, part unspecified              | Cancer |
| B410000 | malignant neoplasm of endocervical canal                    | Cancer |
| B410100 | malignant neoplasm of endocervical gland                    | Cancer |
| B410z00 | malignant neoplasm of endocervix nos                        | Cancer |
| B412.00 | malignant neoplasm, overlapping lesion of cervix uteri      | Cancer |
| B41y.00 | malignant neoplasm of other site of cervix                  | Cancer |
| B41y000 | malignant neoplasm of cervical stump                        | Cancer |
| B41y100 | malignant neoplasm of squamocolumnar junction of cervix     | Cancer |
| B41yz00 | malignant neoplasm of other site of cervix nos              | Cancer |
| B41z.00 | malignant neoplasm of cervix uteri nos                      | Cancer |
| B911013 | choriocarcinoma                                             | Cancer |
| B430.00 | malignant neoplasm of corpus uteri, excluding isthmus       | Cancer |
| B430000 | malignant neoplasm of cornu of corpus uteri                 | Cancer |
| B430100 | malignant neoplasm of fundus of corpus uteri                | Cancer |
| B430200 | malignant neoplasm of endometrium of corpus uteri           | Cancer |
| B430300 | malignant neoplasm of myometrium of corpus uteri            | Cancer |
| B430z00 | malignant neoplasm of corpus uteri nos                      | Cancer |
| B431.00 | malignant neoplasm of isthmus of uterine body               | Cancer |
| B431000 | malignant neoplasm of lower uterine segment                 | Cancer |

|         |                                                              |        |
|---------|--------------------------------------------------------------|--------|
| B431z00 | malignant neoplasm of isthmus of uterine body nos            | Cancer |
| B432.00 | malignant neoplasm of overlapping lesion of corpus uteri     | Cancer |
| B43y.00 | malignant neoplasm of other site of uterine body             | Cancer |
| B43z.00 | malignant neoplasm of body of uterus nos                     | Cancer |
| B44..00 | malignant neoplasm of ovary and other uterine adnexa         | Cancer |
| B444.00 | malignant neoplasm of round ligament                         | Cancer |
| B44y.00 | malignant neoplasm of other site of uterine adnexa           | Cancer |
| B44z.00 | malignant neoplasm of uterine adnexa nos                     | Cancer |
| B450000 | malignant neoplasm of gartner's duct                         | Cancer |
| B450100 | malignant neoplasm of vaginal vault                          | Cancer |
| B450z00 | malignant neoplasm of vagina nos                             | Cancer |
| B451000 | malignant neoplasm of greater vestibular (bartholin's) gland | Cancer |
| B451z00 | malignant neoplasm of labia majora nos                       | Cancer |
| B45y.00 | malignant neoplasm of other specified female genital organ   | Cancer |
| B45z.00 | malignant neoplasm of female genital organ nos               | Cancer |
| B470.00 | malignant neoplasm of undescended testis                     | Cancer |
| B470000 | malignant neoplasm of ectopic testis                         | Cancer |
| B470z00 | malignant neoplasm of undescended testis nos                 | Cancer |
| B48..00 | malignant neoplasm of penis and other male genital organs    | Cancer |
| B482.00 | malignant neoplasm of body of penis                          | Cancer |
| B483.00 | malignant neoplasm of penis, part unspecified                | Cancer |
| B48y.00 | malignant neoplasm of other male genital organ               | Cancer |
| B48y000 | malignant neoplasm of seminal vesicle                        | Cancer |
| B48y100 | malignant neoplasm of tunica vaginalis                       | Cancer |
| B48yz00 | malignant neoplasm of other male genital organ nos           | Cancer |
| B48z.00 | malignant neoplasm of penis and other male genital organ nos | Cancer |
| B490.00 | malignant neoplasm of trigone of urinary bladder             | Cancer |
| B491.00 | malignant neoplasm of dome of urinary bladder                | Cancer |
| B492.00 | malignant neoplasm of lateral wall of urinary bladder        | Cancer |
| B493.00 | malignant neoplasm of anterior wall of urinary bladder       | Cancer |
| B494.00 | malignant neoplasm of posterior wall of urinary bladder      | Cancer |
| B495.00 | malignant neoplasm of bladder neck                           | Cancer |
| B496.00 | malignant neoplasm of ureteric orifice                       | Cancer |
| B49y.00 | malignant neoplasm of other site of urinary bladder          | Cancer |
| B49y000 | malignant neoplasm, overlapping lesion of bladder            | Cancer |
| B49z.00 | malignant neoplasm of urinary bladder nos                    | Cancer |
| B4A0.00 | malignant neoplasm of kidney parenchyma                      | Cancer |
| B4A0000 | hypernephroma                                                | Cancer |
| B4A1100 | malignant neoplasm of ureteropelvic junction                 | Cancer |
| B4A1z00 | malignant neoplasm of renal pelvis nos                       | Cancer |
| B4Ay.00 | malignant neoplasm of other urinary organs                   | Cancer |
| B4Ay000 | malignant neoplasm of overlapping lesion of urinary organs   | Cancer |
| B4Az.00 | malignant neoplasm of kidney or urinary organs nos           | Cancer |
| B4z..00 | malignant neoplasm of genitourinary organ nos                | Cancer |
| B500000 | malignant neoplasm of ciliary body                           | Cancer |
| B500100 | malignant neoplasm of iris                                   | Cancer |

|         |                                                   |        |
|---------|---------------------------------------------------|--------|
| B500200 | malignant neoplasm of crystalline lens            | Cancer |
| B500300 | malignant neoplasm of sclera                      | Cancer |
| B500z00 | malignant neoplasm of eyeball nos                 | Cancer |
| B501000 | malignant neoplasm of connective tissue of orbit  | Cancer |
| B501100 | malignant neoplasm of extraocular muscle of orbit | Cancer |
| B501z00 | malignant neoplasm of orbit nos                   | Cancer |
| B502.00 | malignant neoplasm of lacrimal gland              | Cancer |
| B507000 | malignant neoplasm of lacrimal sac                | Cancer |
| B507100 | malignant neoplasm of nasolacrimal duct           | Cancer |
| B507z00 | malignant neoplasm of lacrimal duct nos           | Cancer |
| B50y.00 | malignant neoplasm of other specified site of eye | Cancer |
| B50z.00 | malignant neoplasm of eye nos                     | Cancer |
| B510000 | malignant neoplasm of basal ganglia               | Cancer |
| B510100 | malignant neoplasm of cerebral cortex             | Cancer |
| B510200 | malignant neoplasm of corpus striatum             | Cancer |
| B510300 | malignant neoplasm of globus pallidus             | Cancer |
| B510400 | malignant neoplasm of hypothalamus                | Cancer |
| B510500 | malignant neoplasm of thalamus                    | Cancer |
| B510z00 | malignant neoplasm of cerebrum nos                | Cancer |
| B512000 | malignant neoplasm of hippocampus                 | Cancer |
| B512100 | malignant neoplasm of uncus                       | Cancer |
| B512z00 | malignant neoplasm of temporal lobe nos           | Cancer |
| B515000 | malignant neoplasm of choroid plexus              | Cancer |
| B515100 | malignant neoplasm of floor of cerebral ventricle | Cancer |
| B515z00 | malignant neoplasm of cerebral ventricle nos      | Cancer |
| B517000 | malignant neoplasm of cerebral peduncle           | Cancer |
| B517100 | malignant neoplasm of medulla oblongata           | Cancer |
| B517200 | malignant neoplasm of midbrain                    | Cancer |
| B517300 | malignant neoplasm of pons                        | Cancer |
| B51y.00 | malignant neoplasm of other parts of brain        | Cancer |
| B51y000 | malignant neoplasm of corpus callosum             | Cancer |
| B51y100 | malignant neoplasm of tapetum                     | Cancer |
| B51yz00 | malignant neoplasm of other part of brain nos     | Cancer |
| B51z.00 | malignant neoplasm of brain nos                   | Cancer |
| B520000 | malignant neoplasm of olfactory bulb              | Cancer |
| B520z00 | malignant neoplasm of cranial nerves nos          | Cancer |
| B521000 | malignant neoplasm of cerebral dura mater         | Cancer |
| B521100 | malignant neoplasm of cerebral arachnoid mater    | Cancer |
| B521200 | malignant neoplasm of cerebral pia mater          | Cancer |
| B521z00 | malignant neoplasm of cerebral meninges nos       | Cancer |
| B523000 | malignant neoplasm of spinal dura mater           | Cancer |
| B523100 | malignant neoplasm of spinal arachnoid mater      | Cancer |
| B523200 | malignant neoplasm of spinal pia mater            | Cancer |
| B523z00 | malignant neoplasm of spinal meninges nos         | Cancer |
| B524300 | malignant neoplasm of peripheral nerve of thorax  | Cancer |
| B524400 | malignant neoplasm of peripheral nerve of abdomen | Cancer |

|         |                                                              |        |
|---------|--------------------------------------------------------------|--------|
| B524500 | malignant neoplasm of peripheral nerve of pelvis             | Cancer |
| B52y.00 | malignant neoplasm of other specified part of nervous system | Cancer |
| B52z.00 | malignant neoplasm of nervous system nos                     | Cancer |
| B540z00 | malignant neoplasm of adrenal gland nos                      | Cancer |
| B542100 | malignant neoplasm of craniopharyngeal duct                  | Cancer |
| B545.00 | malignant neoplasm of aortic body and other paraganglia      | Cancer |
| B545z00 | malignant neoplasm of aortic body or paraganglia nos         | Cancer |
| B54y.00 | malignant neoplasm of other specified endocrine gland        | Cancer |
| B55..00 | malignant neoplasm of other and ill-defined sites            | Cancer |
| B550.00 | malignant neoplasm of head, neck and face                    | Cancer |
| B550000 | malignant neoplasm of head nos                               | Cancer |
| B550100 | malignant neoplasm of cheek nos                              | Cancer |
| B550200 | malignant neoplasm of nose nos                               | Cancer |
| B550300 | malignant neoplasm of jaw nos                                | Cancer |
| B550400 | malignant neoplasm of neck nos                               | Cancer |
| B550500 | malignant neoplasm of supraclavicular fossa nos              | Cancer |
| B550z00 | malignant neoplasm of head, neck and face nos                | Cancer |
| B551.00 | malignant neoplasm of thorax                                 | Cancer |
| B551000 | malignant neoplasm of axilla nos                             | Cancer |
| B551100 | malignant neoplasm of chest wall nos                         | Cancer |
| B551200 | malignant neoplasm of intrathoracic site nos                 | Cancer |
| B551z00 | malignant neoplasm of thorax nos                             | Cancer |
| B552.00 | malignant neoplasm of abdomen                                | Cancer |
| B553000 | malignant neoplasm of inguinal region nos                    | Cancer |
| B553z00 | malignant neoplasm of pelvis nos                             | Cancer |
| B554.00 | malignant neoplasm of upper limb nos                         | Cancer |
| B555.00 | malignant neoplasm of lower limb nos                         | Cancer |
| B55y.00 | malignant neoplasm of other specified sites                  | Cancer |
| B55y000 | malignant neoplasm of back nos                               | Cancer |
| B55y100 | malignant neoplasm of trunk nos                              | Cancer |
| B55y200 | malignant neoplasm of flank nos                              | Cancer |
| B55yz00 | malignant neoplasm of specified site nos                     | Cancer |
| B573.00 | secondary malignant neoplasm of other respiratory organs     | Cancer |
| B57y.00 | secondary malignant neoplasm of other digestive organ        | Cancer |
| B581.00 | secondary malignant neoplasm of other urinary organs         | Cancer |
| B581z00 | secondary malignant neoplasm of other urinary organ nos      | Cancer |
| B582000 | secondary malignant neoplasm of skin of head                 | Cancer |
| B582400 | secondary malignant neoplasm of skin of shoulder and arm     | Cancer |
| B582500 | secondary malignant neoplasm of skin of hip and leg          | Cancer |
| B582z00 | secondary malignant neoplasm of skin nos                     | Cancer |
| B583.00 | secondary malignant neoplasm of brain and spinal cord        | Cancer |
| B583z00 | secondary malignant neoplasm of brain or spinal cord nos     | Cancer |
| B584.00 | secondary malignant neoplasm of other part of nervous system | Cancer |
| B58y200 | secondary malignant neoplasm of cervix uteri                 | Cancer |
| B58y211 | secondary cancer of the cervix                               | Cancer |
| B58y800 | secondary malignant neoplasm of epididymis and vas deferens  | Cancer |

|         |                                                             |        |
|---------|-------------------------------------------------------------|--------|
| B58z.00 | secondary malignant neoplasm of other specified site nos    | Cancer |
| B59..00 | malignant neoplasm of unspecified site                      | Cancer |
| B591.00 | other malignant neoplasm nos                                | Cancer |
| B592.00 | malignant neoplasms of independent (primary) multiple sites | Cancer |
| B59z.00 | malignant neoplasm of unspecified site nos                  | Cancer |
| B5z..00 | malignant neoplasm of other and unspecified site nos        | Cancer |
| B60..00 | lymphosarcoma and reticulosarcoma                           | Cancer |
| B600000 | reticulosarcoma of unspecified site                         | Cancer |
| B600100 | reticulosarcoma of lymph nodes of head, face and neck       | Cancer |
| B600400 | reticulosarcoma of lymph nodes of axilla and upper limb     | Cancer |
| B600z00 | reticulosarcoma nos                                         | Cancer |
| B601.00 | lymphosarcoma                                               | Cancer |
| B601000 | lymphosarcoma of unspecified site                           | Cancer |
| B601100 | lymphosarcoma of lymph nodes of head, face and neck         | Cancer |
| B601200 | lymphosarcoma of intrathoracic lymph nodes                  | Cancer |
| B601300 | lymphosarcoma of intra-abdominal lymph nodes                | Cancer |
| B601400 | lymphosarcoma of lymph nodes of axilla and upper limb       | Cancer |
| B601600 | lymphosarcoma of intrapelvic lymph nodes                    | Cancer |
| B601700 | lymphosarcoma of spleen                                     | Cancer |
| B601800 | lymphosarcoma of lymph nodes of multiple sites              | Cancer |
| B601z00 | lymphosarcoma nos                                           | Cancer |
| B602000 | burkitt's lymphoma of unspecified site                      | Cancer |
| B602100 | burkitt's lymphoma of lymph nodes of head, face and neck    | Cancer |
| B602200 | burkitt's lymphoma of intrathoracic lymph nodes             | Cancer |
| B602300 | burkitt's lymphoma of intra-abdominal lymph nodes           | Cancer |
| B602400 | burkitt's lymphoma of lymph nodes of axilla and upper limb  | Cancer |
| B602600 | burkitt's lymphoma of intrapelvic lymph nodes               | Cancer |
| B602700 | burkitt's lymphoma of spleen                                | Cancer |
| B602800 | burkitt's lymphoma of lymph nodes of multiple sites         | Cancer |
| B602z00 | burkitt's lymphoma nos                                      | Cancer |
| B60y.00 | other specified reticulosarcoma or lymphosarcoma            | Cancer |
| B60z.00 | reticulosarcoma or lymphosarcoma nos                        | Cancer |
| B610000 | hodgkin's paragranuloma of unspecified site                 | Cancer |
| B610200 | hodgkin's paragranuloma of intrathoracic lymph nodes        | Cancer |
| B610300 | hodgkin's paragranuloma of intra-abdominal lymph nodes      | Cancer |
| B610600 | hodgkin's paragranuloma of intrapelvic lymph nodes          | Cancer |
| B610800 | hodgkin's paragranuloma of lymph nodes of multiple sites    | Cancer |
| B610z00 | hodgkin's paragranuloma nos                                 | Cancer |
| B611000 | hodgkin's granuloma of unspecified site                     | Cancer |
| B611100 | hodgkin's granuloma of lymph nodes of head, face and neck   | Cancer |
| B611300 | hodgkin's granuloma of intra-abdominal lymph nodes          | Cancer |
| B611400 | hodgkin's granuloma of lymph nodes of axilla and upper limb | Cancer |
| B611800 | hodgkin's granuloma of lymph nodes of multiple sites        | Cancer |
| B611z00 | hodgkin's granuloma nos                                     | Cancer |
| B612000 | hodgkin's sarcoma of unspecified site                       | Cancer |
| B612100 | hodgkin's sarcoma of lymph nodes of head, face and neck     | Cancer |



|         |                                                             |        |
|---------|-------------------------------------------------------------|--------|
| B612400 | hodgkin's sarcoma of lymph nodes of axilla and upper limb   | Cancer |
| B612800 | hodgkin's sarcoma of lymph nodes of multiple sites          | Cancer |
| B612z00 | hodgkin's sarcoma nos                                       | Cancer |
| B613700 | hodgkin's, lymphocytic-histiocytic predominance of spleen   | Cancer |
| B613z00 | hodgkin's, lymphocytic-histiocytic predominance nos         | Cancer |
| B614000 | hodgkin's disease, nodular sclerosis of unspecified site    | Cancer |
| B614z00 | hodgkin's disease, nodular sclerosis nos                    | Cancer |
| B615000 | hodgkin's disease, mixed cellularity of unspecified site    | Cancer |
| B615z00 | hodgkin's disease, mixed cellularity nos                    | Cancer |
| B616000 | hodgkin's lymphocytic depletion of unspecified site         | Cancer |
| B616700 | hodgkin's disease, lymphocytic depletion of spleen          | Cancer |
| B616z00 | hodgkin's disease, lymphocytic depletion nos                | Cancer |
| B61zz00 | hodgkin's disease nos                                       | Cancer |
| B61z000 | hodgkin's disease nos, unspecified site                     | Cancer |
| B61z100 | hodgkin's disease nos of lymph nodes of head, face and neck | Cancer |
| B61z200 | hodgkin's disease nos of intrathoracic lymph nodes          | Cancer |
| B61z300 | hodgkin's disease nos of intra-abdominal lymph nodes        | Cancer |
| B61z600 | hodgkin's disease nos of intrapelvic lymph nodes            | Cancer |
| B61z700 | hodgkin's disease nos of spleen                             | Cancer |
| B61z800 | hodgkin's disease nos of lymph nodes of multiple sites      | Cancer |
| B62..00 | other malignant neoplasm of lymphoid and histiocytic tissue | Cancer |
| B620000 | nodular lymphoma of unspecified site                        | Cancer |
| B620100 | nodular lymphoma of lymph nodes of head, face and neck      | Cancer |
| B620400 | nodular lymphoma of lymph nodes of axilla and upper limb    | Cancer |
| B620z00 | nodular lymphoma nos                                        | Cancer |
| B621000 | mycosis fungoides of unspecified site                       | Cancer |
| B621800 | mycosis fungoides of lymph nodes of multiple sites          | Cancer |
| B621z00 | mycosis fungoides nos                                       | Cancer |
| B622000 | sezary's disease of unspecified site                        | Cancer |
| B622100 | sezary's disease of lymph nodes of head, face and neck      | Cancer |
| B622200 | sezary's disease of intrathoracic lymph nodes               | Cancer |
| B622300 | sezary's disease of intra-abdominal lymph nodes             | Cancer |
| B622400 | sezary's disease of lymph nodes of axilla and upper limb    | Cancer |
| B622600 | sezary's disease of intrapelvic lymph nodes                 | Cancer |
| B622800 | sezary's disease of lymph nodes of multiple sites           | Cancer |
| B622z00 | sezary's disease nos                                        | Cancer |
| B623000 | malignant histiocytosis of unspecified site                 | Cancer |
| B623z00 | malignant histiocytosis nos                                 | Cancer |
| B624000 | leukaemic reticuloendotheliosis of unspecified sites        | Cancer |
| B624700 | leukaemic reticuloendotheliosis of spleen                   | Cancer |
| B624z00 | leukaemic reticuloendotheliosis nos                         | Cancer |
| B625000 | letterer-siwe disease of unspecified sites                  | Cancer |
| B625z00 | letterer-siwe disease nos                                   | Cancer |
| B626.00 | malignant mast cell tumours                                 | Cancer |
| B626000 | mast cell malignancy of unspecified site                    | Cancer |
| B626100 | mast cell malignancy of lymph nodes of head, face and neck  | Cancer |

|         |                                                              |        |
|---------|--------------------------------------------------------------|--------|
| B626200 | mast cell malignancy of intrathoracic lymph nodes            | Cancer |
| B626300 | mast cell malignancy of intra-abdominal lymph nodes          | Cancer |
| B626400 | mast cell malignancy of lymph nodes of axilla and upper limb | Cancer |
| B626600 | mast cell malignancy of intrapelvic lymph nodes              | Cancer |
| B626700 | mast cell malignancy of spleen                               | Cancer |
| B626800 | mast cell malignancy of lymph nodes of multiple sites        | Cancer |
| B626z00 | malignant mast cell tumour nos                               | Cancer |
| B627300 | diffuse non-hodgkin's small cell (diffuse) lymphoma          | Cancer |
| B627400 | diffuse non-hodgkin's small cleaved cell (diffuse) lymphoma  | Cancer |
| B627800 | diffuse non-hodgkin's lymphoma undifferentiated (diffuse)    | Cancer |
| B627B00 | other types of follicular non-hodgkin's lymphoma             | Cancer |
| B62x.00 | malignant lymphoma otherwise specified                       | Cancer |
| B62x500 | malignant immunoproliferative small intestinal disease       | Cancer |
| B62yz00 | malignant lymphoma nos                                       | Cancer |
| B62y000 | malignant lymphoma nos of unspecified site                   | Cancer |
| B62y100 | malignant lymphoma nos of lymph nodes of head, face and neck | Cancer |
| B62y200 | malignant lymphoma nos of intrathoracic lymph nodes          | Cancer |
| B62y300 | malignant lymphoma nos of intra-abdominal lymph nodes        | Cancer |
| B62y600 | malignant lymphoma nos of intrapelvic lymph nodes            | Cancer |
| B62y700 | malignant lymphoma nos of spleen                             | Cancer |
| B62y800 | malignant lymphoma nos of lymph nodes of multiple sites      | Cancer |
| B62z.00 | malignant neoplasms of lymphoid and histiocytic tissue nos   | Cancer |
| B630000 | malignant plasma cell neoplasm, extramedullary plasmacytoma  | Cancer |
| B63y.00 | other immunoproliferative neoplasms                          | Cancer |
| B63z.00 | immunoproliferative neoplasm or myeloma nos                  | Cancer |
| B64..11 | lymphatic leukaemia                                          | Cancer |
| B64..00 | lymphoid leukaemia                                           | Cancer |
| B642.00 | subacute lymphoid leukaemia                                  | Cancer |
| B64y.00 | other lymphoid leukaemia                                     | Cancer |
| B64y000 | aleukaemic lymphoid leukaemia                                | Cancer |
| B64y200 | adult t-cell leukaemia                                       | Cancer |
| B64yz00 | other lymphoid leukaemia nos                                 | Cancer |
| B64z.00 | lymphoid leukaemia nos                                       | Cancer |
| B65..00 | myeloid leukaemia                                            | Cancer |
| B651000 | chronic eosinophilic leukaemia                               | Cancer |
| B651200 | chronic neutrophilic leukaemia                               | Cancer |
| B651z00 | chronic myeloid leukaemia nos                                | Cancer |
| B652.00 | subacute myeloid leukaemia                                   | Cancer |
| B653000 | chloroma                                                     | Cancer |
| B653100 | granulocytic sarcoma                                         | Cancer |
| B653z00 | myeloid sarcoma nos                                          | Cancer |
| B65y.00 | other myeloid leukaemia                                      | Cancer |
| B65y000 | aleukaemic myeloid leukaemia                                 | Cancer |
| B65yz00 | other myeloid leukaemia nos                                  | Cancer |
| B65z.00 | myeloid leukaemia nos                                        | Cancer |
| B66..00 | monocytic leukaemia                                          | Cancer |

|         |                                                             |        |
|---------|-------------------------------------------------------------|--------|
| B66..12 | monoblastic leukaemia                                       | Cancer |
| B66..11 | histiocytic leukaemia                                       | Cancer |
| B661.00 | chronic monocytic leukaemia                                 | Cancer |
| B662.00 | subacute monocytic leukaemia                                | Cancer |
| B66y.00 | other monocytic leukaemia                                   | Cancer |
| B66y000 | aleukaemic monocytic leukaemia                              | Cancer |
| B66yz00 | other monocytic leukaemia nos                               | Cancer |
| B66z.00 | monocytic leukaemia nos                                     | Cancer |
| B67..00 | other specified leukaemia                                   | Cancer |
| B672.11 | thrombocytic leukaemia                                      | Cancer |
| B672.00 | megakaryocytic leukaemia                                    | Cancer |
| B67y.00 | other and unspecified leukaemia                             | Cancer |
| B67yz00 | other and unspecified leukaemia nos                         | Cancer |
| B67z.00 | other specified leukaemia nos                               | Cancer |
| B68..00 | leukaemia of unspecified cell type                          | Cancer |
| B680.00 | acute leukaemia nos                                         | Cancer |
| B681.00 | chronic leukaemia nos                                       | Cancer |
| B682.00 | subacute leukaemia nos                                      | Cancer |
| B68y.00 | other leukaemia of unspecified cell type                    | Cancer |
| B68z.00 | leukaemia nos                                               | Cancer |
| B69..00 | myelomonocytic leukaemia                                    | Cancer |
| B692.00 | subacute myelomonocytic leukaemia                           | Cancer |
| B6z..00 | malignant neoplasm lymphatic or haematopoietic tissue nos   | Cancer |
| B628500 | diffuse follicle centre lymphoma                            | Cancer |
| B800z00 | carcinoma in situ of lip, oral cavity and pharynx nos       | Cancer |
| B801z00 | carcinoma in situ of oesophagus nos                         | Cancer |
| B802z00 | carcinoma in situ of stomach nos                            | Cancer |
| B803700 | carcinoma in situ of splenic flexure of colon               | Cancer |
| B803z00 | carcinoma in situ of colon nos                              | Cancer |
| B804.00 | carcinoma in situ of rectum and rectosigmoid junction       | Cancer |
| B804z00 | carcinoma in situ of rectum or rectosigmoid junction nos    | Cancer |
| B806.00 | carcinoma in situ of anus nos                               | Cancer |
| B807.00 | carcinoma in situ of other and unspecified small intestine  | Cancer |
| B808200 | carcinoma in situ of hepatic duct                           | Cancer |
| B808z00 | carcinoma in situ of liver or biliary system nos            | Cancer |
| B80z.00 | carcinoma in situ of other and unspecified digestive organs | Cancer |
| B81..00 | carcinoma in situ of respiratory system                     | Cancer |
| B810000 | carcinoma in situ of thyroid cartilage                      | Cancer |
| B810100 | carcinoma in situ of cricoid cartilage                      | Cancer |
| B810300 | carcinoma in situ of arytenoid cartilage                    | Cancer |
| B810600 | carcinoma in situ of aryepiglottic fold                     | Cancer |
| B810700 | carcinoma in situ of vestibular fold                        | Cancer |
| B810z00 | carcinoma in situ of larynx nos                             | Cancer |
| B812.00 | carcinoma in situ of bronchus and lung                      | Cancer |
| B812000 | carcinoma in situ of carina of bronchus                     | Cancer |
| B812200 | carcinoma in situ of upper lobe bronchus and lung           | Cancer |

|         |                                                         |        |
|---------|---------------------------------------------------------|--------|
| B812300 | carcinoma in situ of middle lobe bronchus and lung      | Cancer |
| B812400 | carcinoma in situ of lower lobe bronchus and lung       | Cancer |
| B812z00 | carcinoma in situ of bronchus or lung nos               | Cancer |
| B81z.00 | carcinoma in situ of respiratory organ nos              | Cancer |
| B821.00 | carcinoma in situ of skin of eyelid including canthus   | Cancer |
| B822000 | carcinoma in situ of skin of auricle                    | Cancer |
| B823500 | carcinoma in situ of skin of temple                     | Cancer |
| B823600 | carcinoma in situ of skin of jaw                        | Cancer |
| B824.00 | carcinoma in situ of scalp and skin of neck             | Cancer |
| B824000 | carcinoma in situ of scalp                              | Cancer |
| B825.00 | carcinoma in situ of skin of trunk, excluding scrotum   | Cancer |
| B825100 | carcinoma in situ of skin of chest wall nos             | Cancer |
| B825400 | carcinoma in situ of skin of abdominal wall             | Cancer |
| B825z00 | carcinoma in situ of skin of trunk nos                  | Cancer |
| B826.00 | carcinoma in situ of skin of upper limb and shoulder    | Cancer |
| B826100 | carcinoma in situ of skin of upper arm                  | Cancer |
| B826200 | carcinoma in situ of skin of lower arm                  | Cancer |
| B826z00 | carcinoma in situ of skin of upper limb or shoulder nos | Cancer |
| B827.00 | carcinoma in situ of skin of lower limb and hip         | Cancer |
| B827300 | carcinoma in situ of skin of lower leg                  | Cancer |
| B827z00 | carcinoma in situ of skin of lower limb or hip nos      | Cancer |
| B828300 | melanoma in situ of scalp and neck                      | Cancer |
| B82y.00 | carcinoma in situ of other specified sites of skin      | Cancer |
| B82z.00 | carcinoma in situ of skin nos                           | Cancer |
| B83..00 | carcinoma in situ of breast and genitourinary system    | Cancer |
| B830.00 | carcinoma in situ of breast                             | Cancer |
| B833z00 | carcinoma in situ of female genital organs nos          | Cancer |
| B83z.00 | carcinoma in situ of urinary organs nos                 | Cancer |
| B8y..00 | carcinoma in situ of other and unspecified sites        | Cancer |
| B8yy.00 | carcinoma in situ of other specified site               | Cancer |
| B8yyz00 | carcinoma in situ of other specified site nos           | Cancer |
| B8z..00 | carcinoma in situ nos                                   | Cancer |
| BB06.00 | [m]tumour cells, uncertain whether benign or malignant  | Cancer |
| BB12.00 | [m]carcinoma nos                                        | Cancer |
| BB13.00 | [m]carcinoma, metastatic, nos                           | Cancer |
| BB17.00 | [m]large cell carcinoma nos                             | Cancer |
| BB18.00 | [m]carcinoma, undifferentiated type, nos                | Cancer |
| BB19.00 | [m]carcinoma, anaplastic type, nos                      | Cancer |
| BB1G.00 | [m]spheroidal cell carcinoma                            | Cancer |
| BB1J.00 | [m]small cell carcinoma nos                             | Cancer |
| BB22.00 | [m]papillary carcinoma nos                              | Cancer |
| BB24.00 | [m]verrucous carcinoma nos                              | Cancer |
| BB2A.00 | [m]squamous cell carcinoma nos                          | Cancer |
| BB2B.00 | [m]squamous cell carcinoma, metastatic nos              | Cancer |
| BB31.00 | [m]basal cell carcinoma nos                             | Cancer |
| BB43.00 | [m]transitional cell carcinoma nos                      | Cancer |

|         |                                                              |        |
|---------|--------------------------------------------------------------|--------|
| BB4z.00 | [m]transitional cell papilloma or carcinoma nos              | Cancer |
| BB52.00 | [m]adenocarcinoma nos                                        | Cancer |
| BB53.00 | [m]adenocarcinoma, metastatic, nos                           | Cancer |
| BB5B.00 | [m]pancreatic adenomas and carcinomas                        | Cancer |
| BB5Bz00 | [m]pancreatic adenoma or carcinoma nos                       | Cancer |
| BB5C.00 | [m]gastrinoma and carcinomas                                 | Cancer |
| BB5Cz00 | [m]gastrinoma or carcinoma nos                               | Cancer |
| BB5D.00 | [m]hepatobiliary tract adenomas and carcinomas               | Cancer |
| BB5Dz00 | [m]hepatobiliary adenoma or carcinoma nos                    | Cancer |
| BB5L.00 | [m]adenomatous and adenocarcinomatous polyps                 | Cancer |
| BB5Lz00 | [m]adenomatous or adenocarcinomatous polyp nos               | Cancer |
| BB5M.00 | [m]tubular adenomas and adenocarcinomas                      | Cancer |
| BB5Mz00 | [m]tubular adenoma or adenocarcinoma nos                     | Cancer |
| BB5Nz00 | [m]adenomatous or adenocarcinomatous polyps of the colon nos | Cancer |
| BB5P.00 | [m]solid carcinoma nos                                       | Cancer |
| BB5R100 | [m]carcinoid tumour, malignant                               | Cancer |
| BB5R500 | [m]carcinoid tumour, nonargentaffin, malignant               | Cancer |
| BB5S.00 | [m]respiratory tract adenomas and adenocarcinomas            | Cancer |
| BB5Sz00 | [m]respiratory tract adenoma or adenocarcinoma nos           | Cancer |
| BB5T.00 | [m]papillary adenomas and adenocarcinomas                    | Cancer |
| BB5T100 | [m]papillary adenocarcinoma nos                              | Cancer |
| BB5Tz00 | [m]papillary adenoma or adenocarcinoma nos                   | Cancer |
| BB5U.00 | [m]villous adenomas and adenocarcinomas                      | Cancer |
| BB5U100 | [m]adenocarcinoma in villous adenoma                         | Cancer |
| BB5Uz00 | [m]villous adenoma or adenocarcinoma nos                     | Cancer |
| BB5V.00 | [m]pituitary adenomas and carcinomas                         | Cancer |
| BB5Vz00 | [m]pituitary adenoma or carcinoma nos                        | Cancer |
| BB5W.00 | [m]oxyphilic adenomas and adenocarcinomas                    | Cancer |
| BB5Wz00 | [m]oxyphilic adenoma or adenocarcinoma nos                   | Cancer |
| BB5X.00 | [m]clear cell adenomas and adenocarcinomas                   | Cancer |
| BB5X100 | [m]clear cell adenocarcinoma nos                             | Cancer |
| BB5Xz00 | [m]clear cell adenoma or adenocarcinoma nos                  | Cancer |
| BB5a.00 | [m]renal adenoma and carcinoma                               | Cancer |
| BB5az00 | [m]renal adenoma or carcinoma nos                            | Cancer |
| BB5c.00 | [m]parathyroid adenomas and adenocarcinomas                  | Cancer |
| BB5cz00 | [m]parathyroid adenoma or adenocarcinoma nos                 | Cancer |
| BB5f.00 | [m]thyroid adenoma and adenocarcinoma                        | Cancer |
| BB5f100 | [m]follicular adenocarcinoma nos                             | Cancer |
| BB5fz00 | [m]thyroid adenoma or adenocarcinoma nos                     | Cancer |
| BB5j.00 | [m]endometrioid adenomas and carcinomas                      | Cancer |
| BB5jz00 | [m]endometrioid adenoma or carcinoma nos                     | Cancer |
| BB5z.00 | [m]adenoma or adenocarcinoma nos                             | Cancer |
| BB60.00 | [m]skin appendage adenoma and carcinoma                      | Cancer |
| BB60100 | [m]skin appendage carcinoma                                  | Cancer |
| BB61.00 | [m]sweat gland adenoma and adenocarcinomas                   | Cancer |
| BB61200 | [m]sweat gland adenocarcinoma                                | Cancer |

|         |                                                             |        |
|---------|-------------------------------------------------------------|--------|
| BB62.00 | [m]apocrine adenoma and adenocarcinomas                     | Cancer |
| BB62z00 | [m]apocrine adenoma or adenocarcinoma nos                   | Cancer |
| BB69.00 | [m]sebaceous adenoma and adenocarcinoma                     | Cancer |
| BB69z00 | [m]sebaceous adenoma or adenocarcinoma nos                  | Cancer |
| BB6A.00 | [m]ceruminous adenoma and adenocarcinoma                    | Cancer |
| BB80.00 | [m]cystadenoma and carcinoma                                | Cancer |
| BB80100 | [m]cystadenocarcinoma nos                                   | Cancer |
| BB80z00 | [m]cystadenoma or carcinoma nos                             | Cancer |
| BB81200 | [m]serous cystadenocarcinoma, nos                           | Cancer |
| BB81500 | [m]papillary cystadenocarcinoma, nos                        | Cancer |
| BB81E00 | [m]mucinous cystadenocarcinoma nos                          | Cancer |
| BB82.00 | [m]mucinous adenoma and adenocarcinoma                      | Cancer |
| BB82z00 | [m]mucinous adenoma or adenocarcinoma nos                   | Cancer |
| BB85z00 | [m]signet ring carcinoma nos                                | Cancer |
| BB93.00 | [m]comedocarcinoma nos                                      | Cancer |
| BB9B.00 | [m]medullary carcinoma nos                                  | Cancer |
| BB9E000 | [m]intraductal carcinoma and lobular carcinoma in situ      | Cancer |
| BB9F.00 | [m]lobular carcinoma nos                                    | Cancer |
| BBE..00 | [m]naevi and melanomas                                      | Cancer |
| BBEQ.00 | [m]spindle cell melanoma nos                                | Cancer |
| BBEz.00 | [m]naevi or melanoma nos                                    | Cancer |
| BBF..00 | [m]soft tissue tumours and sarcomas nos                     | Cancer |
| BBF1.00 | [m]sarcoma nos                                              | Cancer |
| BBF2.00 | [m]sarcomatosis nos                                         | Cancer |
| BBFz.00 | [m]soft tissue tumour or sarcoma nos                        | Cancer |
| BBJ1.00 | [m]liposarcoma nos                                          | Cancer |
| BBK0200 | [m]leiomyosarcoma nos                                       | Cancer |
| BBK2.00 | [m]myoma and myosarcoma                                     | Cancer |
| BBK2z00 | [m]myoma or myosarcoma nos                                  | Cancer |
| BBL4.00 | [m]mixed tumour, malignant, nos                             | Cancer |
| BBL9.00 | [m]carcinosarcoma nos                                       | Cancer |
| BBM8.00 | [m]cystosarcoma phyllodes nos                               | Cancer |
| BBN5.00 | [m]clear cell sarcoma of tendons and aponeuroses            | Cancer |
| BBQ3.00 | [m]embryonal carcinoma nos                                  | Cancer |
| BBVA.00 | [m] small cell osteosarcoma                                 | Cancer |
| BBVz.00 | [m]osteoma or osteosarcoma nos                              | Cancer |
| BBW4.00 | [m]chondrosarcoma nos                                       | Cancer |
| BBg..00 | [m]lymphomas, nos or diffuse                                | Cancer |
| BBg1000 | [m]malignant lymphoma, diffuse nos                          | Cancer |
| BBg3.00 | [m]malignant lymphoma, undifferentiated cell type nos       | Cancer |
| BBg5.00 | [m]malignant lymphoma, convoluted cell type nos             | Cancer |
| BBgA.00 | [m]malignant lymphoma, centroblastic-centrocytic, diffuse   | Cancer |
| BBgB.00 | [m]malignant lymphoma, follicular centre cell nos           | Cancer |
| BBgC.00 | [m]malignant lymphoma, lymphocytic, well differentiated nos | Cancer |
| BBgE.00 | [m]malignant lymphoma, centrocytic                          | Cancer |
| BBgH.00 | [m]prolymphocytic lymphosarcoma                             | Cancer |

|         |                                                              |        |
|---------|--------------------------------------------------------------|--------|
| BBgJ.00 | [m]malignant lymphoma, centroblastic type nos                | Cancer |
| BBgQ.00 | [m]malignant lymphomatous polyposis                          | Cancer |
| BBgS.00 | [m]malignant lymphoma, large cell, cleaved, diffuse          | Cancer |
| BBj1.00 | [m]hodgkin's disease, lymphocytic predominance               | Cancer |
| BBj1000 | [m]hodgkin,s disease, lymphocytic predominance, diffuse      | Cancer |
| BBj6100 | [m]hodgkin,s disease, nodular sclerosis, mixed cellularity   | Cancer |
| BBk2.00 | [m]malignant lymphoma, centroblastic-centrocytic, follicular | Cancer |
| BBkz.00 | [m]lymphoma, nodular or follicular nos                       | Cancer |
| BBlz.00 | [m]mycosis fungoides nos                                     | Cancer |
| BBm2.00 | [m]histiocytic medullary reticulosis                         | Cancer |
| BBm5.00 | [m] peripheral t-cell lymphoma nos                           | Cancer |
| BBmH.00 | [m] large cell lymphoma                                      | Cancer |
| BBp0.00 | [m]mastocytoma nos                                           | Cancer |
| BBv0.00 | [m]monocytoid b-cell lymphoma                                | Cancer |
| By...00 | neoplasms otherwise specified                                | Cancer |
| Byu..00 | [x]additional neoplasm classification terms                  | Cancer |
| Byu1.00 | [x]malignant neoplasm of digestive organs                    | Cancer |
| Byu1000 | [x]other sarcomas of the liver                               | Cancer |
| Byu1100 | [x]other specified carcinomas of liver                       | Cancer |
| Byu1200 | [x]malignant neoplasm of intestinal tract, part unspecified  | Cancer |
| Byu2000 | [x]malignant neoplasm of bronchus or lung, unspecified       | Cancer |
| Byu2500 | [x]malignant neoplasm of mediastinum, part unspecified       | Cancer |
| Byu3.00 | [x]malignant neoplasm of bone and articular cartilage        | Cancer |
| Byu4.00 | [x]melanoma and other malignant neoplasms of skin            | Cancer |
| Byu4100 | [x]malignant melanoma of skin, unspecified                   | Cancer |
| Byu4300 | [x]malignant neoplasm of skin, unspecified                   | Cancer |
| Byu5.00 | [x]malignant neoplasm of mesothelial and soft tissue         | Cancer |
| Byu5100 | [x]mesothelioma, unspecified                                 | Cancer |
| Byu5200 | [x]kaposi's sarcoma of multiple organs                       | Cancer |
| Byu5300 | [x]kaposi's sarcoma, unspecified                             | Cancer |
| Byu5700 | [x]malignant neoplasm of peritoneum, unspecified             | Cancer |
| Byu5A00 | [x]malignant neoplasm overlapping lesion of skin             | Cancer |
| Byu5B00 | [x]kaposi's sarcoma of other sites                           | Cancer |
| Byu6.00 | [x]malignant neoplasm of breast                              | Cancer |
| Byu7.00 | [x]malignant neoplasm of female genital organs               | Cancer |
| Byu7000 | [x]malignant neoplasm of uterine adnexa, unspecified         | Cancer |
| Byu7300 | [x]malignant neoplasm of female genital organ, unspecified   | Cancer |
| Byu8.00 | [x]malignant neoplasm of male genital organs                 | Cancer |
| Byu8200 | [x]malignant neoplasm of male genital organ, unspecified     | Cancer |
| Byu9.00 | [x]malignant neoplasm of urinary tract                       | Cancer |
| Byu9000 | [x]malignant neoplasm of urinary organ, unspecified          | Cancer |
| ByuA200 | [x]malignant neoplasm of meninges, unspecified               | Cancer |
| ByuB.00 | [x]malignant neoplasm of thyroid and other endocrine glands  | Cancer |
| ByuB100 | [x]malignant neoplasm of endocrine gland, unspecified        | Cancer |
| ByuC000 | [x]malignant neoplasm of other specified sites               | Cancer |
| ByuC700 | [x]secondary malignant neoplasm of other specified sites     | Cancer |

|         |                                                             |        |
|---------|-------------------------------------------------------------|--------|
| ByuC800 | [x]malignant neoplasm without specification of site         | Cancer |
| ByuD000 | [x]other hodgkin's disease                                  | Cancer |
| ByuD100 | [x]other types of follicular non-hodgkin's lymphoma         | Cancer |
| ByuD200 | [x]other types of diffuse non-hodgkin's lymphoma            | Cancer |
| ByuD300 | [x]other specified types of non-hodgkin's lymphoma          | Cancer |
| ByuD400 | [x]other malignant immunoproliferative diseases             | Cancer |
| ByuD500 | [x]other lymphoid leukaemia                                 | Cancer |
| ByuD600 | [x]other myeloid leukaemia                                  | Cancer |
| ByuD700 | [x]other monocytic leukaemia                                | Cancer |
| ByuD800 | [x]other specified leukaemias                               | Cancer |
| ByuD900 | [x]other leukaemia of unspecified cell type                 | Cancer |
| ByuDC00 | [x]diffuse non-hodgkin's lymphoma, unspecified              | Cancer |
| ByuDE00 | [x]unspecified b-cell non-hodgkin's lymphoma                | Cancer |
| ByuF100 | [x]carcinoma in situ of other specified digestive organs    | Cancer |
| ByuF300 | [x]carcinoma in situ of other parts of respiratory system   | Cancer |
| ByuF600 | [x]melanoma in situ of other sites                          | Cancer |
| ByuF900 | [x]carcinoma in situ of skin, unspecified                   | Cancer |
| ByuFA00 | [x]carcinoma in situ of other parts of cervix               | Cancer |
| ByuFF00 | [x]melanoma in situ, unspecified                            | Cancer |
| ByuFG00 | [x]other carcinoma in situ of breast                        | Cancer |
| Bz...00 | neoplasms nos                                               | Cancer |
| C333.00 | macroglobulinaemia                                          | Cancer |
| C333000 | waldenstrom's macroglobulinaemia                            | Cancer |
| C333z00 | macroglobulinaemia nos                                      | Cancer |
| C37y700 | histiocytosis, unspecified                                  | Cancer |
| BBm9.00 | [m] monocytoid b-cell lymphoma                              | Cancer |
| BBA2.00 | [m]acinar cell carcinoma                                    | Cancer |
| BBZG.11 | [m]adamantinoma, malignant                                  | Cancer |
| BB5N100 | [m]adenocarcinoma in adenomatous polypsis coli              | Cancer |
| BB5L100 | [m]adenocarcinoma in adenomatous polyp                      | Cancer |
| BB51.00 | [m]adenocarcinoma in situ                                   | Cancer |
| BBB5.00 | [m]adenocarcinoma with apocrine metaplasia                  | Cancer |
| BBB3.00 | [m]adenocarcinoma with cartilaginous and osseous metaplasia | Cancer |
| BBB4.00 | [m]adenocarcinoma with spindle cell metaplasia              | Cancer |
| BBB2.00 | [m]adenocarcinoma with squamous metaplasia                  | Cancer |
| BB57.00 | [m]adenocarcinoma, intestinal type                          | Cancer |
| BB5..11 | [m]adenocarcinomas                                          | Cancer |
| BB5J.00 | [m]adenoid cystic carcinoma                                 | Cancer |
| BB2G.00 | [m]adenoid squamous cell carcinoma                          | Cancer |
| BBB1.00 | [m]adenolymphoma                                            | Cancer |
| BB5N.11 | [m]adenoma or or adenocarcinoma in polyposis coli           | Cancer |
| BB5..00 | [m]adenomas and adenocarcinomas                             | Cancer |
| BBL7111 | [m]adenosarcoma                                             | Cancer |
| BBB0.00 | [m]adenosquamous carcinoma                                  | Cancer |
| BB5h100 | [m]adrenal cortical carcinoma                               | Cancer |
| BB5S400 | [m]alveolar adenocarcinoma                                  | Cancer |



|         |                                               |        |
|---------|-----------------------------------------------|--------|
| BB5S211 | [m]alveolar cell carcinoma                    | Cancer |
| BBK3700 | [m]alveolar rhabdomyosarcoma                  | Cancer |
| BBEA.00 | [m]amelanotic melanoma                        | Cancer |
| BBZN.00 | [m]ameloblastic fibrosarcoma                  | Cancer |
| BBZC.00 | [m]ameloblastic odontosarcoma                 | Cancer |
| BBZG.00 | [m]ameloblastoma, malignant                   | Cancer |
| BBK1100 | [m]angiomyosarcoma                            | Cancer |
| BBT1.11 | [m]angiosarcoma                               | Cancer |
| BB62100 | [m]apocrine adenocarcinoma                    | Cancer |
| BBE4.00 | [m]balloon cell melanoma                      | Cancer |
| BB34.00 | [m]basal cell carcinoma, fibroepithelial type | Cancer |
| BB33.00 | [m]basal cell carcinoma, morphoea type        | Cancer |
| BB48.00 | [m]basaloid carcinoma                         | Cancer |
| BB5V700 | [m]basophil carcinoma                         | Cancer |
| BB35.00 | [m]basosquamous carcinoma                     | Cancer |
| BB5D111 | [m]bile duct carcinoma                        | Cancer |
| BB5D300 | [m]bile duct cystadenocarcinoma               | Cancer |
| BB5D.11 | [m]biliary tract adenomas and adenocarcinomas | Cancer |
| BBM0100 | [m]brenner tumour, malignant                  | Cancer |
| BBk0.11 | [m]brill - symmers' disease                   | Cancer |
| BB5S212 | [m]bronchiolar carcinoma                      | Cancer |
| BB9B.11 | [m]c cell carcinoma                           | Cancer |
| BB11.00 | [m]carcinoma in situ nos                      | Cancer |
| BB58.00 | [m]carcinoma, diffuse type                    | Cancer |
| BBLA.00 | [m]carcinosarcoma, embryonal type             | Cancer |
| BB5D100 | [m]cholangiocarcinoma                         | Cancer |
| BBV2.00 | [m]chondroblastic osteosarcoma                | Cancer |
| BBW8.00 | [m]chondroblastoma, malignant                 | Cancer |
| BBR3.00 | [m]choriocarcinoma combined with teratoma     | Cancer |
| BB5V100 | [m]chromophobe carcinoma                      | Cancer |
| BBLJ.00 | [m]clear cell sarcoma of kidney               | Cancer |
| BB49.00 | [m]cloacogenic carcinoma                      | Cancer |
| BB82111 | [m]colloid adenocarcinoma                     | Cancer |
| BB92.00 | [m]comedocarcinoma, noninfiltrating           | Cancer |
| BBG8.11 | [m]congenital fibrosarcoma                    | Cancer |
| BB5K.00 | [m]cribriform carcinoma                       | Cancer |
| BB5J.11 | [m]cylindroid adenocarcinoma                  | Cancer |
| BBM7.11 | [m]cystosarcoma phyllodes, benign             | Cancer |
| BBM9.00 | [m]cystosarcoma phyllodes, malignant          | Cancer |
| BBQ9.00 | [m]dermoid cyst with malignant transformation | Cancer |
| BB91.11 | [m]duct carcinoma nos                         | Cancer |
| BBK3600 | [m]embryonal rhabdomyosarcoma                 | Cancer |
| BBLD.00 | [m]embryonal sarcoma                          | Cancer |
| BBL0.00 | [m]endometrial stromal sarcoma                | Cancer |
| BB5j500 | [m]endometrioid adenofibroma, malignant       | Cancer |
| BB5j200 | [m]endometrioid carcinoma                     | Cancer |

|         |                                                             |        |
|---------|-------------------------------------------------------------|--------|
| BBY0.11 | [m]endothelial bone sarcoma                                 | Cancer |
| BB5V311 | [m]eosinophil carcinoma                                     | Cancer |
| BB29.11 | [m]epidermoid carcinoma in situ                             | Cancer |
| BB2A.11 | [m]epidermoid carcinoma nos                                 | Cancer |
| BB2C.11 | [m]epidermoid carcinoma, keratinising type                  | Cancer |
| BBEP.00 | [m]epithelioid cell melanoma                                | Cancer |
| BBF6.00 | [m]epithelioid cell sarcoma                                 | Cancer |
| BBK0400 | [m]epithelioid leiomyosarcoma                               | Cancer |
| BBP5.00 | [m]epithelioid mesothelioma, malignant                      | Cancer |
| BB16.00 | [m]epithelioma, malignant                                   | Cancer |
| BBY0.00 | [m]ewing's sarcoma                                          | Cancer |
| BBV3.00 | [m]fibroblastic osteosarcoma                                | Cancer |
| BBW4.11 | [m]fibrochondrosarcoma                                      | Cancer |
| BBJ1.11 | [m]fibroliposarcoma                                         | Cancer |
| BBG3.00 | [m]fibromyxosarcoma                                         | Cancer |
| BBGJ.00 | [m]fibroxanthoma, malignant                                 | Cancer |
| BB5f300 | [m]follicular adenocarcinoma, trabecular type               | Cancer |
| BB5f200 | [m]follicular adenocarcinoma, well differentiated type      | Cancer |
| BBk0.12 | [m]follicular lymphosarcoma nos                             | Cancer |
| BB5C100 | [m]gastrinoma, malignant                                    | Cancer |
| BB82112 | [m]gelatinous adenocarcinoma                                | Cancer |
| BB1B.00 | [m]giant cell and spindle cell carcinoma                    | Cancer |
| BBX1.11 | [m]giant cell bone sarcoma                                  | Cancer |
| BB1C.00 | [m]giant cell carcinoma                                     | Cancer |
| BBX1.00 | [m]giant cell tumour of bone, malignant                     | Cancer |
| BBk0.13 | [m]giant follicular lymphoma                                | Cancer |
| BBb0.00 | [m]glioma, malignant                                        | Cancer |
| BBb0.12 | [m]gliosarcoma                                              | Cancer |
| BBDB.00 | [m]glomangiosarcoma                                         | Cancer |
| BBDB.11 | [m]glomoid sarcoma                                          | Cancer |
| BB5B500 | [m]glucagonoma, malignant                                   | Cancer |
| BB5b.00 | [m]granular cell carcinoma                                  | Cancer |
| BBf..00 | [m]granular cell tumours and alveolar soft part sarcoma     | Cancer |
| BBC4.00 | [m]granulosa cell tumour, malignant                         | Cancer |
| BBT7100 | [m]haemangioendothelioma, malignant                         | Cancer |
| BBTD200 | [m]haemangiopericytoma, malignant                           | Cancer |
| BBT1.00 | [m]haemangiosarcoma                                         | Cancer |
| BBL8.00 | [m]hepatoblastoma                                           | Cancer |
| BB5D512 | [m]hepatoma, malignant                                      | Cancer |
| BBj0.00 | [m]hodgkin's disease nos                                    | Cancer |
| BBj4.00 | [m]hodgkin's disease,lymphocytic depletion,diffuse fibrosis | Cancer |
| BBj6200 | [m]hodgkin,s disease, nodular sclerosis, lymphocytic deplet | Cancer |
| BBj6000 | [m]hodgkin,s disease, nodular sclerosis, lymphocytic predom | Cancer |
| BB5W111 | [m]hurthle cell adenocarcinoma                              | Cancer |
| BBQ4.11 | [m]infantile embryonal carcinoma                            | Cancer |
| BBG8.00 | [m]infantile fibrosarcoma                                   | Cancer |

|         |                                                               |        |
|---------|---------------------------------------------------------------|--------|
| BB91.00 | [m]infiltrating duct carcinoma                                | Cancer |
| BB9G.00 | [m]infiltrating ductular carcinoma                            | Cancer |
| BB9H.00 | [m]inflammatory carcinoma                                     | Cancer |
| BB5B300 | [m]insulinoma, malignant                                      | Cancer |
| BB9M.00 | [m]intracystic carcinoma nos                                  | Cancer |
| BB90.00 | [m]intraductal carcinoma, noninfiltrating nos                 | Cancer |
| BB29.12 | [m]intraepidermal carcinoma nos                               | Cancer |
| BB11.11 | [m]intraepithelial carcinoma nos                              | Cancer |
| BB29.13 | [m]intraepithelial squamous cell carcinoma                    | Cancer |
| BB22.11 | [m]intraosseous carcinoma                                     | Cancer |
| BB5B100 | [m]islet cell carcinoma                                       | Cancer |
| BB94.00 | [m]juvenile breast carcinoma                                  | Cancer |
| BBW6.00 | [m]juxtacortical chondrosarcoma                               | Cancer |
| BBV..11 | [m]juxtacortical osteogenic sarcoma                           | Cancer |
| BBEG.11 | [m]lentigo maligna melanoma                                   | Cancer |
| BBd2.11 | [m]leptomeningeal sarcoma                                     | Cancer |
| BBCC100 | [m]leydig cell tumour, malignant                              | Cancer |
| BBJ3.00 | [m]liposarcoma, well differentiated type                      | Cancer |
| BB5D513 | [m]liver cell carcinoma                                       | Cancer |
| BB9E.00 | [m]lobular carcinoma in situ                                  | Cancer |
| BBgG.11 | [m]lymphoblastic lymphosarcoma nos                            | Cancer |
| BBgG.13 | [m]lymphoblastoma nos                                         | Cancer |
| BB2M.00 | [m]lymphoepithelial carcinoma                                 | Cancer |
| BBg1.11 | [m]lymphoma nos                                               | Cancer |
| BBgz.00 | [m]lymphoma, diffuse or nos                                   | Cancer |
| BBk..00 | [m]lymphomas, nodular or follicular                           | Cancer |
| BBg0.00 | [m]lymphomatous tumour, benign                                | Cancer |
| BBg6.00 | [m]lymphosarcoma nos                                          | Cancer |
| BBgK.00 | [m]malig lymphoma, follicular centre cell, non-cleaved nos    | Cancer |
| BBgD.00 | [m]malig lymphoma, lymphocytic, intermediate different nos    | Cancer |
| BBk3.00 | [m]malig lymphoma, lymphocytic, well differentiated,nodular   | Cancer |
| N237300 | pseudosarcomatous fibromatosis                                | Cancer |
| BBgN.00 | [m]malign lymphoma,lymphocytic,intermediate differrn, diffuse | Cancer |
| BBX3.00 | [m]malignant giant cell tumour of soft parts                  | Cancer |
| BBg1.00 | [m]malignant lymphoma nos                                     | Cancer |
| BBgT.00 | [m]malignant lymphoma, large cell, noncleaved, diffuse        | Cancer |
| BBgG.00 | [m]malignant lymphoma, lymphocytic, poorly different nos      | Cancer |
| BBg2.00 | [m]malignant lymphoma, non hodgkin's type                     | Cancer |
| BBgV.00 | [m]malignant lymphoma, small cell, noncleaved, diffuse        | Cancer |
| BBg4.00 | [m]malignant lymphoma, stem cell type                         | Cancer |
| BBEM.00 | [m]malignant melanoma in giant pigmented naevus               | Cancer |
| BBEC.00 | [m]malignant melanoma in junctional naevus                    | Cancer |
| BBQ7500 | [m]malignant teratoma, intermediate type                      | Cancer |
| BBR4.00 | [m]malignant teratoma, trophoblastic                          | Cancer |
| BBQ7400 | [m]malignant teratoma, undifferentiated type                  | Cancer |
| BB0A.00 | [m]malignant tumour, fusiform cell type                       | Cancer |

|         |                                                              |        |
|---------|--------------------------------------------------------------|--------|
| BB09.00 | [m]malignant tumour, giant cell type                         | Cancer |
| BB08.00 | [m]malignant tumour, small cell type                         | Cancer |
| BBp1.00 | [m]mast cell sarcoma                                         | Cancer |
| N330900 | osteoporosis in multiple myelomatosis                        | Cancer |
| BB9C.00 | [m]medullary carcinoma with amyloid stroma                   | Cancer |
| BB9D.00 | [m]medullary carcinoma with lymphoid stroma                  | Cancer |
| BBE1.11 | [m]melanocarcinoma                                           | Cancer |
| BBE1.12 | [m]melanoma nos                                              | Cancer |
| BBE1.13 | [m]melanosarcoma nos                                         | Cancer |
| BBdB.00 | [m]meningeal sarcomatosis                                    | Cancer |
| BBd2.00 | [m]meningioma, malignant                                     | Cancer |
| BBd2.12 | [m]meningothelial sarcoma                                    | Cancer |
| BBW9.00 | [m]mesenchymal chondrosarcoma                                | Cancer |
| BBLC100 | [m]mesenchymoma, malignant                                   | Cancer |
| BBP7.00 | [m]mesothelioma, biphasic type, malignant                    | Cancer |
| BBP1.00 | [m]mesothelioma, malignant                                   | Cancer |
| BB85100 | [m]metastatic signet ring cell carcinoma                     | Cancer |
| BB36.00 | [m]metatypical carcinoma                                     | Cancer |
| BBm..00 | [m]miscellaneous reticuloendothelial neoplasms               | Cancer |
| BBK3300 | [m]mixed cell rhabdomyosarcoma                               | Cancer |
| BBET.00 | [m]mixed epithelioid and spindle melanoma                    | Cancer |
| BB5B600 | [m]mixed islet cell and exocrine adenocarcinoma              | Cancer |
| BBJ8.00 | [m]mixed type liposarcoma                                    | Cancer |
| BB84.00 | [m]mucin-producing adenocarcinoma                            | Cancer |
| BB82100 | [m]mucinous adenocarcinoma                                   | Cancer |
| BB71.00 | [m]mucoepidermoid carcinoma                                  | Cancer |
| BB5V711 | [m]muroid cell carcinoma                                     | Cancer |
| BB82114 | [m]mucous adenocarcinoma                                     | Cancer |
| BB32.00 | [m]multicentric basal cell carcinoma                         | Cancer |
| BBn0.11 | [m]multiple myeloma                                          | Cancer |
| BBI..00 | [m]mycosis fungoides                                         | Cancer |
| BBI0.00 | [m]mycosis fungoides                                         | Cancer |
| BBn0.13 | [m]myelomatosis                                              | Cancer |
| BBK2100 | [m]myosarcoma                                                | Cancer |
| BBV9.00 | [m]myxoid chondrosarcoma                                     | Cancer |
| BBJ5.00 | [m]myxoid liposarcoma                                        | Cancer |
| BBJ5.12 | [m]myxoliposarcoma                                           | Cancer |
| BBE1.14 | [m]naevocarcinoma                                            | Cancer |
| BB04.00 | [m]neoplasm, malig, uncertain whether primary or metastatic  | Cancer |
| BB02.00 | [m]neoplasm, malignant                                       | Cancer |
| BB03.00 | [m]neoplasm, metastatic                                      | Cancer |
| BBe7.00 | [m]neurilemmoma, malignant                                   | Cancer |
| BBe2.00 | [m]neurofibrosarcoma                                         | Cancer |
| BBy2.00 | [m]no microscopic confirmation tumour, clinically metastatic | Cancer |
| BBE2.00 | [m]nodular melanoma                                          | Cancer |
| BBg2.11 | [m]non hodgkins lymphoma                                     | Cancer |

|         |                                                           |        |
|---------|-----------------------------------------------------------|--------|
| BB5f700 | [m]nonencapsulated sclerosing carcinoma                   | Cancer |
| BB96.00 | [m]noninfiltrating intraductal papillary adenocarcinoma   | Cancer |
| BB1K.00 | [m]oat cell carcinoma                                     | Cancer |
| BBZN.11 | [m]odontogenic fibrosarcoma                               | Cancer |
| BBZ2.00 | [m]odontogenic tumour, malignant                          | Cancer |
| BB5W112 | [m]oncytic adenocarcinoma                                 | Cancer |
| BBV1.11 | [m]osteoblastic sarcoma                                   | Cancer |
| BBV1.12 | [m]osteochondrosarcoma                                    | Cancer |
| BBX1.12 | [m]osteoclastoma, malignant                               | Cancer |
| BBV1.13 | [m]osteogenic sarcoma nos                                 | Cancer |
| BBV5.00 | [m]osteosarcoma in paget's disease of bone                | Cancer |
| BB81.11 | [m]ovarian cystadenoma or carcinoma                       | Cancer |
| BB5W100 | [m]oxyphilic adenocarcinoma                               | Cancer |
| BB9K.00 | [m]paget's disease and infiltrating breast duct carcinoma | Cancer |
| BB9J.11 | [m]paget's disease, breast                                | Cancer |
| BB5f600 | [m]papillary and follicular adenocarcinoma                | Cancer |
| BB21.00 | [m]papillary carcinoma in situ                            | Cancer |
| BB26.11 | [m]papillary epidermoid carcinoma                         | Cancer |
| BB81H00 | [m]papillary mucinous cystadenocarcinoma                  | Cancer |
| BB81800 | [m]papillary serous cystadenocarcinoma                    | Cancer |
| BB26.00 | [m]papillary squamous cell carcinoma                      | Cancer |
| BB4A.00 | [m]papillary transitional cell carcinoma                  | Cancer |
| BBD1.00 | [m]paraganglioma, malignant                               | Cancer |
| BBV..12 | [m]parosteal osteosarcoma                                 | Cancer |
| BBV..13 | [m]periosteal osteogenic sarcoma                          | Cancer |
| BBDA.00 | [m]phaeochromocytoma, malignant                           | Cancer |
| BBn3.00 | [m]plasma cell tumour, malignant                          | Cancer |
| BBn2.00 | [m]plasmacytoma nos                                       | Cancer |
| BBn1.11 | [m]plasmacytoma, benign                                   | Cancer |
| BB1A.00 | [m]pleomorphic carcinoma                                  | Cancer |
| BBF4.11 | [m]pleomorphic cell sarcoma                               | Cancer |
| BBJ7.00 | [m]pleomorphic liposarcoma                                | Cancer |
| BBK3200 | [m]pleomorphic rhabdomyosarcoma                           | Cancer |
| BB1F.00 | [m]polygonal cell carcinoma                               | Cancer |
| BB81E11 | [m]pseudomucinous adenocarcinoma                          | Cancer |
| BB1E.00 | [m]pseudosarcomatous carcinoma                            | Cancer |
| BB5a000 | [m]renal cell carcinoma                                   | Cancer |
| BBh0.00 | [m]reticulosarcoma nos                                    | Cancer |
| BBh2.00 | [m]reticulosarcoma, nodular                               | Cancer |
| BBh..00 | [m]reticulosarcomas                                       | Cancer |
| BB1J.12 | [m]round cell carcinoma                                   | Cancer |
| BBJ6.00 | [m]round cell liposarcoma                                 | Cancer |
| BBF5.11 | [m]round cell sarcoma                                     | Cancer |
| BBK3611 | [m]sarcoma botryoides                                     | Cancer |
| BB46.00 | [m]schneiderian carcinoma                                 | Cancer |
| BBe7.11 | [m]schwannoma, malignant                                  | Cancer |

|         |                                                              |        |
|---------|--------------------------------------------------------------|--------|
| BB54.00 | [m]scirrhous adenocarcinoma                                  | Cancer |
| BB03.11 | [m]secondary neoplasm                                        | Cancer |
| BB94.11 | [m]secretory breast carcinoma                                | Cancer |
| BB81B00 | [m]serous surface papillary carcinoma                        | Cancer |
| BBCA.00 | [m]sertoli cell carcinoma                                    | Cancer |
| BB85.00 | [m]signet ring carcinoma                                     | Cancer |
| BB85000 | [m]signet ring cell carcinoma                                | Cancer |
| BB1L.00 | [m]small cell carcinoma, fusiform cell type                  | Cancer |
| BBF5.00 | [m]small cell sarcoma                                        | Cancer |
| BB1D.00 | [m]spindle cell carcinoma                                    | Cancer |
| BBE5.00 | [m]spindle cell melanoma, type b                             | Cancer |
| BBF3.00 | [m]spindle cell sarcoma                                      | Cancer |
| BB2A.12 | [m]spinous cell carcinoma                                    | Cancer |
| BB2D.00 | [m]squamous cell carcinoma, large cell, non-keratinising     | Cancer |
| BB2J.00 | [m]squamous cell carcinoma, microinvasive                    | Cancer |
| BB2E.00 | [m]squamous cell carcinoma, small cell, non-keratinising     | Cancer |
| BB2F.00 | [m]squamous cell carcinoma, spindle cell type                | Cancer |
| B911000 | malignant hydatidiform mole                                  | Cancer |
| BBQA100 | [m]struma ovarii, malignant                                  | Cancer |
| BB56.00 | [m]superficial spreading adenocarcinoma                      | Cancer |
| BBEH.00 | [m]superficial spreading melanoma                            | Cancer |
| BBN4.00 | [m]synovial sarcoma, biphasic type                           | Cancer |
| BBN2.00 | [m]synovial sarcoma, spindle cell type                       | Cancer |
| BBV4.00 | [m]telangiectatic osteosarcoma                               | Cancer |
| BBQ7213 | [m]teratoblastoma, malignant                                 | Cancer |
| BBQ7300 | [m]teratocarcinoma                                           | Cancer |
| BBB6100 | [m]thymoma, malignant                                        | Cancer |
| BB5F.00 | [m]trabecular adenocarcinoma                                 | Cancer |
| BB42.00 | [m]transitional cell carcinoma in situ                       | Cancer |
| BB47.00 | [m]transitional cell carcinoma, spindle cell type            | Cancer |
| BB4..00 | [m]transitional cell papillomas and carcinomas               | Cancer |
| BB5M100 | [m]tubular adenocarcinoma                                    | Cancer |
| BB07.00 | [m]tumour cells, malignant                                   | Cancer |
| BB43.11 | [m]urothelial carcinoma                                      | Cancer |
| BB24.11 | [m]verrucous epidermoid carcinoma                            | Cancer |
| BB24.12 | [m]verrucous squamous cell carcinoma                         | Cancer |
| BB5U200 | [m]villous adenocarcinoma                                    | Cancer |
| BBmK.00 | [m]waldenstrom's macroglobulinaemia                          | Cancer |
| B828.00 | melanoma in situ of skin                                     | Cancer |
| ZV67700 | [v]follow-up exam after radiotherapy for malignant neoplasm  | Cancer |
| ZV67600 | [v]follow-up examination aft surgery for malignant neoplasm  | Cancer |
| ZV67A00 | [v]folow-up exam aft other treatment for malignant neoplasm  | Cancer |
| ZV67B00 | [v]folow-up exam aft unspec treatment for malignant neoplasm | Cancer |
| B150300 | hepatocellular carcinoma                                     | Cancer |
| B150100 | hepatoblastoma of liver                                      | Cancer |
| B150200 | primary angiosarcoma of liver                                | Cancer |

|         |                                                              |        |
|---------|--------------------------------------------------------------|--------|
| ZV10413 | [v]personal history malignant neoplasm - male genital organ  | Cancer |
| B62x000 | t-zone lymphoma                                              | Cancer |
| B62x100 | lymphoepithelioid lymphoma                                   | Cancer |
| ZV10000 | [v]personal history of malig neop of gastrointestinal tract  | Cancer |
| ZV10012 | [v]personal history of malig neop of gastrointestinal tract  | Cancer |
| ZV10100 | [v]personal history of malig neop of trachea/bronchus/lung   | Cancer |
| ZV10200 | [v]personal history of malig neop other intrathoracic organ  | Cancer |
| B62x600 | true histiocytic lymphoma                                    | Cancer |
| B630.11 | kahler's disease                                             | Cancer |
| B630.12 | myelomatosis                                                 | Cancer |
| B630.00 | multiple myeloma                                             | Cancer |
| B675.00 | acute myelofibrosis                                          | Cancer |
| 208 RV  | polycythaemia rubra vera                                     | Cancer |
| ZV10400 | [v]personal history of malignant neoplasm of genital organ   | Cancer |
| ZV10512 | [v]personal history of malignant neoplasm of kidney          | Cancer |
| ZV10y16 | [v]personal history of malignant neoplasm of tongue          | Cancer |
| ZV10700 | [v]personal history other lymphatic/haematopoietic neoplasm  | Cancer |
| C37y800 | haemophagocytic lymphohistiocytosis                          | Cancer |
| B576200 | malignant ascites                                            | Cancer |
| 4M72.00 | clark melanoma level 3                                       | Cancer |
| ByuC500 | [x]2ndry malignant neoplasm/bladder+oth+unsp urinary organs  | Cancer |
| ByuC600 | [x]2ndry malignant neoplasm/oth+unspec parts/nervous system  | Cancer |
| ByuC200 | [x]2ndry+unspcf malignant neoplasm lymph nodes/multi regions | Cancer |
| ByuFC00 | [x]carcinoma in situ of oth+unspecified male genital organs  | Cancer |
| 4M73.00 | clark melanoma level 4                                       | Cancer |
| BBGJ.11 | [m]fibroxanthosarcoma                                        | Cancer |
| B141.11 | carcinoma of rectum                                          | Cancer |
| B141.12 | rectal carcinoma                                             | Cancer |
| B338.00 | squamous cell carcinoma of skin                              | Cancer |
| B595.00 | malignant tumour of unknown origin                           | Cancer |
| B4...11 | carcinoma of genitourinary organ                             | Cancer |
| B3...12 | sarcoma of bone and connective tissue                        | Cancer |
| B3...11 | carcinoma of bone, connective tissue, skin and breast        | Cancer |
| B0...11 | carcinoma of lip, oral cavity and pharynx                    | Cancer |
| B2...11 | carcinoma of respiratory tract and intrathoracic organs      | Cancer |
| B134.11 | carcinoma of caecum                                          | Cancer |
| B142.11 | anal carcinoma                                               | Cancer |
| B161211 | carcinoma common bile duct                                   | Cancer |
| B305.11 | malignant neoplasm of carpal bones                           | Cancer |
| B305.12 | malignant neoplasm of metacarpal bones                       | Cancer |
| B47z.11 | seminoma of testis                                           | Cancer |
| B57..12 | secondary carcinoma of respiratory and/or digestive systems  | Cancer |
| B58..11 | secondary carcinoma of other specified sites                 | Cancer |
| B5...11 | carcinoma of other and unspecified sites                     | Cancer |
| B822.11 | carcinoma in situ of ear                                     | Cancer |
| Byu5800 | [x]mal neoplasm/connective+soft tissue of trunk,unspecified  | Cancer |

|         |                                                               |        |
|---------|---------------------------------------------------------------|--------|
| Byu5500 | [x]mal neoplasm/overlap les/periph nerv+autonomic nerv system | Cancer |
| Byu3000 | [x]mal neoplasm/overlap lesion/bone+articular cartilage/limb  | Cancer |
| Byu5600 | [x]mal neoplasm/periph nerves+autonomic nervous system,unspc  | Cancer |
| ByuA300 | [x]malig neopl, overlap lesion brain & other part of cns      | Cancer |
| Byu4000 | [x]malignant melanoma of other+unspecified parts of face      | Cancer |
| Byu2300 | [x]malignant neopl/overlapping les/resp+intrathoracic organs  | Cancer |
| ByuA.00 | [x]malignant neoplasm of eye, brain and other parts of cent   | Cancer |
| ByuC.00 | [x]malignant neoplasm of ill-defined, secondary and unspeci   | Cancer |
| Byu0.00 | [x]malignant neoplasm of lip, oral cavity and pharynx         | Cancer |
| Byu2.00 | [x]malignant neoplasm of respiratory and intrathoracic orga   | Cancer |
| Byu3300 | [x]malignant neoplasm/bone+articular cartilage, unspecified   | Cancer |
| Byu3100 | [x]malignant neoplasm/bones+articular cartilage/limb,unspfd   | Cancer |
| ByuA100 | [x]malignant neoplasm/central nervous system, unspecified     | Cancer |
| Byu5900 | [x]malignant neoplasm/connective + soft tissue,unspecified    | Cancer |
| Byu2400 | [x]malignant neoplasm/ill-defined sites within resp system    | Cancer |
| ByuA000 | [x]malignant neoplasm/other and unspecified cranial nerves    | Cancer |
| Byu7100 | [x]malignant neoplasm/other specified female genital organs   | Cancer |
| Byu8000 | [x]malignant neoplasm/other specified male genital organs     | Cancer |
| Byu3200 | [x]malignant neoplasm/overlap lesion/bone+articulr cartilage  | Cancer |
| Byu2100 | [x]malignant neoplasm/overlap lesion/heart,mediastinm+pleura  | Cancer |
| ByuC100 | [x]malignant neoplasm/overlap lesion/other+ill-defined sites  | Cancer |
| Byu7200 | [x]malignant neoplasm/overlapping lesion/feml genital organs  | Cancer |
| Byu8100 | [x]malignant neoplasm/overlapping lesion/male genital organs  | Cancer |
| Byu5400 | [x]malignant neoplasm/peripheral nerves of trunk,unspecified  | Cancer |
| Byu2200 | [x]malignant neoplasm/upper resp tract, part unspecified      | Cancer |
| ByuD.00 | [x]malignant neoplasms of lymphoid, haematopoietic and rela   | Cancer |
| ByuE.00 | [x]malignant neoplasms/independent (primary) multiple sites   | Cancer |
| ByuE000 | [x]malignant neoplasms/independent(primary)multiple sites     | Cancer |
| Byu1300 | [x]malignant neoplsm/ill-defin sites within digestive system  | Cancer |
| B62xX00 | oth and unspecif peripheral & cutaneous t-cell lymphomas      | Cancer |
| 142..00 | h/o: malignant neoplasm (*)                                   | Cancer |
| Byu5011 | [x]mesothelioma of lung                                       | Cancer |
| ByuDF11 | [x]non-hodgkin's lymphoma nos                                 | Cancer |
| B1...00 | malignant neoplasm of digestive organs and peritoneum         | Cancer |
| B10z.00 | malignant neoplasm of oesophagus nos                          | Cancer |
| B13z.00 | malignant neoplasm of colon nos                               | Cancer |
| B222.00 | malignant neoplasm of upper lobe, bronchus or lung            | Cancer |
| B22z.00 | malignant neoplasm of bronchus or lung nos                    | Cancer |
| B30..00 | malignant neoplasm of bone and articular cartilage            | Cancer |
| B305.00 | malignant neoplasm of hand bones                              | Cancer |
| B308.00 | malignant neoplasm of short bones of leg                      | Cancer |
| B33..00 | other malignant neoplasm of skin                              | Cancer |
| B454.00 | malignant neoplasm of vulva unspecified                       | Cancer |
| B47z.00 | malignant neoplasm of testis nos                              | Cancer |
| B590.00 | disseminated malignancy nos                                   | Cancer |
| B6...00 | malignant neoplasm of lymphatic and haemopoietic tissue       | Cancer |



|         |                                                               |        |
|---------|---------------------------------------------------------------|--------|
| B62zz00 | lymphoid and histiocytic malignancy nos                       | Cancer |
| B832.00 | carcinoma in situ of other and unspecified parts of uterus    | Cancer |
| BB5N.00 | [m]adenomatous and adenocarcinomatous polyps of colon         | Cancer |
| BBE1.00 | [m]malignant melanoma nos                                     | Cancer |
| BBV..00 | [m]osteomas and osteosarcomas                                 | Cancer |
| BBj0.11 | [m]lymphogranuloma, malignant                                 | Cancer |
| BBk0.00 | [m]malignant lymphoma, nodular nos                            | Cancer |
| Byu5000 | [x]mesothelioma of other sites                                | Cancer |
| B00..11 | carcinoma of lip                                              | Cancer |
| ByuDD00 | [x]oth and unspecif peripheral & cutaneous t-cell lymphomas   | Cancer |
| Byu4200 | [x]oth malignant neoplasm/skin of oth+unspecfd parts of face  | Cancer |
| ByuDA00 | [x]oth spcf mal neoplsm/lymphoid,haematopoietic+rLtd tissue   | Cancer |
| B0...00 | malignant neoplasm of lip, oral cavity and pharynx            | Cancer |
| B800.00 | carcinoma in situ of lip, oral cavity and pharynx             | Cancer |
| ByuDF00 | [x]non-hodgkin's lymphoma, unspecified type                   | Cancer |
| B4...00 | malignant neoplasm of genitourinary organ                     | Cancer |
| B5...00 | malignant neoplasm of other and unspecified sites             | Cancer |
| B58y.00 | secondary malignant neoplasm of other specified sites         | Cancer |
| B808.00 | carcinoma in situ of liver and biliary system                 | Cancer |
| B56..00 | secondary and unspecified malignant neoplasm of lymph nodes   | Cancer |
| B003.00 | malignant neoplasm of lower lip, inner aspect                 | Cancer |
| B30..12 | osteoma                                                       | Cancer |
| B594.00 | secondary malignant neoplasm of unknown site                  | Cancer |
| 1739B   | epithelioma basal cell                                        | Cancer |
| B454.11 | primary vulval cancer                                         | Cancer |
| B62zz11 | immunoproliferative neoplasm                                  | Cancer |
| 142..12 | h/o: carcinoma                                                | Cancer |
| B339.00 | dermatofibrosarcoma protuberans                               | Cancer |
| B627900 | mucosa-associated lymphoma                                    | Cancer |
| B627000 | follicular non-hodgkin's small cleaved cell lymphoma          | Cancer |
| B627200 | follicular non-hodgkin's large cell lymphoma                  | Cancer |
| B62E600 | enteropathy-associated t-cell lymphoma                        | Cancer |
| B222.11 | pancoast's syndrome                                           | Cancer |
| ByuC300 | [x]secondary malignant neoplasm/oth+unspc respiratory organs  | Cancer |
| ByuC400 | [x]secondary malignant neoplasm/oth+unspecfd digestive organs | Cancer |
| B540.11 | phaeochromocytoma                                             | Cancer |
| B627D00 | diffuse non-hodgkin's centroblastic lymphoma                  | Cancer |
| B623.00 | malignant histiocytosis                                       | Cancer |
| B62x400 | malignant reticulosis                                         | Cancer |
| B590.11 | carcinomatosis                                                | Cancer |
| B6y1.00 | myelosclerosis with myeloid metaplasia                        | Cancer |
| D212000 | anaemia in ovarian carcinoma                                  | Cancer |
| B215.00 | malignant neoplasm of epiglottis nos                          | Cancer |
| B627C00 | follicular non-hodgkin's lymphoma                             | Cancer |
| B936.12 | plasmacytoma nos                                              | Cancer |
| C354A00 | metastatic calcification                                      | Cancer |

|         |                                                            |        |
|---------|------------------------------------------------------------|--------|
| B007.00 | malignant neoplasm of lip, unspecified                     | Cancer |
| BBjz.00 | [m]hodgkin's disease nos                                   | Cancer |
| B325700 | malignant melanoma of back                                 | Cancer |
| B593.00 | primary malignant neoplasm of unknown site                 | Cancer |
| B331000 | malignant neoplasm of canthus                              | Cancer |
| B332200 | malignant neoplasm of pinna nec                            | Cancer |
| B335A00 | malignant neoplasm of skin of scapular region              | Cancer |
| B670.00 | acute erythraemia and erythroleukaemia                     | Cancer |
| B325800 | malignant melanoma of chest wall                           | Cancer |
| B331100 | malignant neoplasm of upper eyelid                         | Cancer |
| B331200 | malignant neoplasm of lower eyelid                         | Cancer |
| B630300 | lambda light chain myeloma                                 | Cancer |
| B470200 | seminoma of undescended testis                             | Cancer |
| B471000 | seminoma of descended testis                               | Cancer |
| B690.00 | acute myelomonocytic leukaemia                             | Cancer |
| B36..00 | local recurrence of malignant tumour of breast             | Cancer |
| B498.00 | local recurrence of malignant tumour of urinary bladder    | Cancer |
| B828800 | melanoma in situ of back of hand                           | Cancer |
| B828900 | melanoma in situ of back                                   | Cancer |
| 1D18.00 | pain from metastases                                       | Cancer |
| B65y100 | acute promyelocytic leukaemia                              | Cancer |
| ZV10.00 | [v]personal history of malignant neoplasm                  | Cancer |
| ZV10300 | [v]personal history of malignant neoplasm of breast        | Cancer |
| ZV10412 | [v]personal history of malignant neoplasm of genital organ | Cancer |
| ZV10500 | [v]personal history of malignant neoplasm of urinary organ | Cancer |
| ZV10600 | [v]personal history of leukaemia                           | Cancer |
| ZV10y00 | [v]personal history of other specified malignant neoplasm  | Cancer |
| ZV10z00 | [v]personal history of unspecified malignant neoplasm      | Cancer |
| B471z00 | malignant neoplasm of descended testis nos                 | Cancer |
| B691.00 | chronic myelomonocytic leukaemia                           | Cancer |
| B18y700 | malignant neoplasm of mesentery                            | Cancer |
| B18y300 | malignant neoplasm of omentum                              | Cancer |
| B451.00 | malignant neoplasm of labia majora                         | Cancer |
| B452.00 | malignant neoplasm of labia minora                         | Cancer |
| B511.00 | malignant neoplasm of frontal lobe                         | Cancer |
| B512.00 | malignant neoplasm of temporal lobe                        | Cancer |
| B513.00 | malignant neoplasm of parietal lobe                        | Cancer |
| B514.00 | malignant neoplasm of occipital lobe                       | Cancer |
| B515.00 | malignant neoplasm of cerebral ventricles                  | Cancer |
| B521.00 | malignant neoplasm of cerebral meninges                    | Cancer |
| B523.00 | malignant neoplasm of spinal meninges                      | Cancer |
| B525.00 | malignant neoplasm of cauda equina                         | Cancer |
| B33z100 | naevoid basal cell carcinoma syndrome                      | Cancer |
| 4M20.00 | lymphoma stage i                                           | Cancer |
| B640.00 | acute lymphoid leukaemia                                   | Cancer |
| B800500 | carcinoma in situ of cheek                                 | Cancer |

|         |                                                              |        |
|---------|--------------------------------------------------------------|--------|
| B810800 | carcinoma in situ of vocal fold - glottis                    | Cancer |
| B800.11 | carcinoma in situ of oral cavity                             | Cancer |
| B802400 | carcinoma in situ of pyloric canal                           | Cancer |
| B624600 | leukaemic reticuloendotheliosis of intrapelvic lymph nodes   | Cancer |
| B624200 | leukaemic reticuloendotheliosis of intrathoracic lymph nodes | Cancer |
| B58y000 | secondary malignant neoplasm of breast                       | Cancer |
| B58y411 | secondary cancer of the vulva                                | Cancer |
| B602500 | burkitt's lymphoma of lymph nodes of inguinal region and leg | Cancer |
| B34..11 | ca female breast                                             | Cancer |
| B....11 | cancers                                                      | Cancer |
| B160.11 | carcinoma gallbladder                                        | Cancer |
| B808.11 | carcinoma in situ of biliary system                          | Cancer |
| B80..00 | carcinoma in situ of digestive organs                        | Cancer |
| B808300 | carcinoma in situ of gall bladder                            | Cancer |
| B800300 | carcinoma in situ of gums                                    | Cancer |
| B81y.11 | carcinoma in situ of nasal sinuses                           | Cancer |
| B81y.00 | carcinoma in situ of other specified part respiratory system | Cancer |
| B800200 | carcinoma in situ of salivary glands                         | Cancer |
| B827.11 | carcinoma in situ of skin of leg                             | Cancer |
| B823.00 | carcinoma in situ of skin of other parts of face             | Cancer |
| B81yz00 | carcinoma in situ of specified parts respiratory system nos  | Cancer |
| B833.00 | carcinoma in situ other and unspecified female genital organ | Cancer |
| B836.00 | carcinoma in situ other and unspecified male genital organs  | Cancer |
| B807z00 | carcinoma in situ other and unspecified small intestine nos  | Cancer |
| B822.00 | carcinoma in situ skin of ear and external auricular canal   | Cancer |
| B822z00 | carcinoma in situ skin of ear/external auricular canal nos   | Cancer |
| B1...11 | carcinoma of digestive organs and peritoneum                 | Cancer |
| B583200 | cerebral metastasis                                          | Cancer |
| B51..11 | cerebral tumour - malignant                                  | Cancer |
| B41..11 | cervical carcinoma (uterus)                                  | Cancer |
| B30..11 | chondroma                                                    | Cancer |
| B420.00 | choriocarcinoma                                              | Cancer |
| B671.00 | chronic erythraemia                                          | Cancer |
| B651.11 | chronic granulocytic leukaemia                               | Cancer |
| B641.11 | chronic lymphatic leukaemia                                  | Cancer |
| B33z.11 | squamous cell carcinoma of skin nos                          | Cancer |
| BB2A.13 | [m]squamous cell carcinoma of skin nos                       | Cancer |
| B831.11 | cin iii - carcinoma in situ of cervix                        | Cancer |
| B13z.11 | colonic cancer                                               | Cancer |
| B627.00 | non - hodgkin's lymphoma                                     | Cancer |
| 7G05D00 | excision biopsy of basal cell carcinoma                      | Cancer |
| B627500 | diffuse non-hodgkin mixed sm1 & lge cell (diffuse) lymphoma  | Cancer |
| B627700 | diffuse non-hodgkin's lymphoblastic (diffuse) lymphoma       | Cancer |
| B627X00 | diffuse non-hodgkin's lymphoma, unspecified                  | Cancer |
| B118.00 | siewert type ii adenocarcinoma                               | Cancer |
| B119.00 | siewert type iii adenocarcinoma                              | Cancer |

|         |                                                              |        |
|---------|--------------------------------------------------------------|--------|
| B107.00 | siewert type i adenocarcinoma                                | Cancer |
| B33..12 | epithelioma                                                  | Cancer |
| 7G03K00 | excision malignant skin tumour                               | Cancer |
| D401100 | familial erythrophagocytic lymph histiocytosis               | Cancer |
| B620.00 | nodular lymphoma (brill - symmers disease)                   | Cancer |
| B620500 | nodular lymphoma of lymph nodes of inguinal region and leg   | Cancer |
| B....00 | neoplasms                                                    | Cancer |
| F396200 | myopathy due to malignant disease                            | Cancer |
| B6y0.11 | myeloproliferative disease                                   | Cancer |
| B621500 | mycosis fungoides of lymph nodes of inguinal region and leg  | Cancer |
| B621100 | mycosis fungoides of the lymph nodes of head, face and neck  | Cancer |
| B63..00 | multiple myeloma and immunoproliferative neoplasms           | Cancer |
| B6y1.11 | megakaryocytic myelosclerosis                                | Cancer |
| B57..11 | metastases of respiratory and/or digestive systems           | Cancer |
| B232.00 | mesothelioma of pleura                                       | Cancer |
| B828200 | melanoma in situ of ear and external auricular canal         | Cancer |
| B828600 | melanoma in situ of lower limb, including hip                | Cancer |
| B828X00 | melanoma in situ of other and unspecified parts of face      | Cancer |
| B828500 | melanoma in situ of upper limb, including shoulder           | Cancer |
| B828W00 | melanoma in situ, unspecified                                | Cancer |
| B673.00 | mast cell leukaemia                                          | Cancer |
| B626500 | mast cell malignancy of lymph nodes inguinal region and leg  | Cancer |
| B935.12 | mastocytoma nos                                              | Cancer |
| B204.00 | malignant neoplasm of frontal sinus                          | Cancer |
| B023.00 | malignant neoplasm, overlapping lesion of major saliv gland  | Cancer |
| B524600 | malignant neoplasm,overlap lesion periph nerve & auton ns    | Cancer |
| B54X.00 | malignant neoplasm-pluriglandular involvement,unspecfied     | Cancer |
| B30X.00 | malignant neoplasm/bones+articular cartilage/limb,unspfd     | Cancer |
| B30W.00 | malignant neoplasm/overlap lesion/bone+articulr cartilage    | Cancer |
| B45X.00 | malignant neoplasm/overlapping lesion/feml genital organs    | Cancer |
| B524X00 | malignant neoplasm/peripheral nerves of trunk,unspecified    | Cancer |
| B62x300 | malignant reticuloendotheliosis                              | Cancer |
| B302.00 | malignant neoplasm of vertebral column                       | Cancer |
| B16y.00 | malignant neoplasm other gallbladder/extrahepatic bile duct  | Cancer |
| B1zy.00 | malignant neoplasm other spec digestive tract and peritoneum | Cancer |
| B33X.00 | malignant neoplasm overlapping lesion of skin                | Cancer |
| B542.00 | malignant neoplasm pituitary gland and craniopharyngeal duct | Cancer |
| B073200 | malignant neoplasm posterior margin nasal septum and choanae | Cancer |
| B14z.00 | malignant neoplasm rectum,rectosigmoid junction and anus nos | Cancer |
| B332.00 | malignant neoplasm skin of ear and external auricular canal  | Cancer |
| B333.00 | malignant neoplasm skin of other and unspecified parts face  | Cancer |
| B333z00 | malignant neoplasm skin other and unspec part of face nos    | Cancer |
| B309.00 | malignant neoplasm, overlap les bone and artic cart of limbs | Cancer |
| B317.00 | malignant neoplasm, overlap lesion connective & soft tissue  | Cancer |
| B26..00 | malignant neoplasm, overlap lesion of resp & intrathor orgs  | Cancer |
| B48y200 | malignant neoplasm, overlapping lesion male genital orgs     | Cancer |

|         |                                                               |        |
|---------|---------------------------------------------------------------|--------|
| B51y200 | malignant neoplasm, overlapping lesion of brain               | Cancer |
| B030.00 | malignant neoplasm of upper gum                               | Cancer |
| B002000 | malignant neoplasm of upper lip, buccal aspect                | Cancer |
| B000000 | malignant neoplasm of upper lip, external                     | Cancer |
| B497.00 | malignant neoplasm of urachus                                 | Cancer |
| B4A2.00 | malignant neoplasm of ureter                                  | Cancer |
| B4A3.00 | malignant neoplasm of urethra                                 | Cancer |
| B054.00 | malignant neoplasm of uvula                                   | Cancer |
| B450.00 | malignant neoplasm of vagina                                  | Cancer |
| B33..15 | malignant neoplasm of sweat gland                             | Cancer |
| B47..00 | malignant neoplasm of testis                                  | Cancer |
| B240.00 | malignant neoplasm of thymus                                  | Cancer |
| B53..00 | malignant neoplasm of thyroid gland                           | Cancer |
| B01..00 | malignant neoplasm of tongue                                  | Cancer |
| B060.00 | malignant neoplasm of tonsil                                  | Cancer |
| B061.00 | malignant neoplasm of tonsillar fossa                         | Cancer |
| B220.00 | malignant neoplasm of trachea                                 | Cancer |
| B131.00 | malignant neoplasm of transverse colon                        | Cancer |
| B063.00 | malignant neoplasm of vallecula                               | Cancer |
| B12..00 | malignant neoplasm of small intestine and duodenum            | Cancer |
| B053.00 | malignant neoplasm of soft palate                             | Cancer |
| B485.00 | malignant neoplasm of spermatic cord                          | Cancer |
| B205.00 | malignant neoplasm of sphenoidal sinus                        | Cancer |
| B522.00 | malignant neoplasm of spinal cord                             | Cancer |
| B137.00 | malignant neoplasm of splenic flexure of colon                | Cancer |
| B11..00 | malignant neoplasm of stomach                                 | Cancer |
| B212.00 | malignant neoplasm of subglottis                              | Cancer |
| B022.00 | malignant neoplasm of sublingual gland                        | Cancer |
| B200200 | malignant neoplasm of septum of nose                          | Cancer |
| B133.00 | malignant neoplasm of sigmoid colon                           | Cancer |
| B111000 | malignant neoplasm of prepylorus of stomach                   | Cancer |
| B46..00 | malignant neoplasm of prostate                                | Cancer |
| B081.00 | malignant neoplasm of pyriform sinus                          | Cancer |
| B140.00 | malignant neoplasm of rectosigmoid junction                   | Cancer |
| B4A1000 | malignant neoplasm of renal calyces                           | Cancer |
| B4A1.00 | malignant neoplasm of renal pelvis                            | Cancer |
| B470100 | malignant neoplasm of retained testis                         | Cancer |
| B505.00 | malignant neoplasm of retina                                  | Cancer |
| B056.00 | malignant neoplasm of retromolar area                         | Cancer |
| B553.00 | malignant neoplasm of pelvis                                  | Cancer |
| B524200 | malignant neoplasm of peripheral nerve of low limb, incl hip  | Cancer |
| B524100 | malignant neoplasm of peripheral nerve, upp limb, incl should | Cancer |
| B524000 | malignant neoplasm of peripheral nerves of head, face & neck  | Cancer |
| B543.00 | malignant neoplasm of pineal gland                            | Cancer |
| B542000 | malignant neoplasm of pituitary gland                         | Cancer |
| B23..00 | malignant neoplasm of pleura                                  | Cancer |

|         |                                                             |        |
|---------|-------------------------------------------------------------|--------|
| B080.00 | malignant neoplasm of postcricoid region                    | Cancer |
| B486.00 | malignant neoplasm of scrotum                               | Cancer |
| B12y.00 | malignant neoplasm of other specified site small intestine  | Cancer |
| B440.00 | malignant neoplasm of ovary                                 | Cancer |
| B225.00 | malignant neoplasm of overlapping lesion of bronchus & lung | Cancer |
| B060200 | malignant neoplasm of overlapping lesion of tonsil          | Cancer |
| B45y000 | malignant neoplasm of overlapping lesion of vulva           | Cancer |
| B062300 | malignant neoplasm of palatopharyngeal arch                 | Cancer |
| B17..00 | malignant neoplasm of pancreas                              | Cancer |
| B541.00 | malignant neoplasm of parathyroid gland                     | Cancer |
| B4A4.00 | malignant neoplasm of paraurethral glands                   | Cancer |
| B020.00 | malignant neoplasm of parotid gland                         | Cancer |
| B501.00 | malignant neoplasm of orbit                                 | Cancer |
| B06..00 | malignant neoplasm of oropharynx                            | Cancer |
| B55z.00 | malignant neoplasm of other and ill defined site nos        | Cancer |
| B5y..00 | malignant neoplasm of other and unspecified site os         | Cancer |
| B0zy.00 | malignant neoplasm of other sites lip, oral cavity, pharynx | Cancer |
| B308.11 | malignant neoplasm of metatarsal bones of foot              | Cancer |
| B241200 | malignant neoplasm of myocardium                            | Cancer |
| B031.00 | malignant neoplasm of lower gum                             | Cancer |
| B003200 | malignant neoplasm of lower lip, mucosa                     | Cancer |
| B003300 | malignant neoplasm of lower lip, oral aspect                | Cancer |
| B001.00 | malignant neoplasm of lower lip, vermilion border           | Cancer |
| B201300 | malignant neoplasm of mastoid air cells                     | Cancer |
| B202.00 | malignant neoplasm of maxillary sinus                       | Cancer |
| B24X.00 | malignant neoplasm of mediastinum, part unspecified         | Cancer |
| B52X.00 | malignant neoplasm of meninges, unspecified                 | Cancer |
| B507.00 | malignant neoplasm of lacrimal duct                         | Cancer |
| B213.00 | malignant neoplasm of laryngeal cartilage                   | Cancer |
| B0z2.00 | malignant neoplasm of laryngopharynx                        | Cancer |
| B21..00 | malignant neoplasm of larynx                                | Cancer |
| B072.00 | malignant neoplasm of lateral wall of nasopharynx           | Cancer |
| B016.00 | malignant neoplasm of lingual tonsil                        | Cancer |
| B00..00 | malignant neoplasm of lip                                   | Cancer |
| B004000 | malignant neoplasm of lip unspecified, buccal aspect        | Cancer |
| B052.00 | malignant neoplasm of hard palate                           | Cancer |
| B170.00 | malignant neoplasm of head of pancreas                      | Cancer |
| B241.00 | malignant neoplasm of heart                                 | Cancer |
| B130.00 | malignant neoplasm of hepatic flexure of colon              | Cancer |
| B6...11 | malignant neoplasm of histiocytic tissue                    | Cancer |
| B08..00 | malignant neoplasm of hypopharynx                           | Cancer |
| B122.00 | malignant neoplasm of ileum                                 | Cancer |
| B121.00 | malignant neoplasm of jejunum                               | Cancer |
| B04..00 | malignant neoplasm of floor of mouth                        | Cancer |
| B160.00 | malignant neoplasm of gallbladder                           | Cancer |
| B4y..00 | malignant neoplasm of genitourinary organ os                | Cancer |

|         |                                                              |        |
|---------|--------------------------------------------------------------|--------|
| B481.00 | malignant neoplasm of glans penis                            | Cancer |
| B062100 | malignant neoplasm of glossopalatine fold                    | Cancer |
| B03..00 | malignant neoplasm of gum                                    | Cancer |
| B132.00 | malignant neoplasm of descending colon                       | Cancer |
| B120.00 | malignant neoplasm of duodenum                               | Cancer |
| B241000 | malignant neoplasm of endocardium                            | Cancer |
| B484.00 | malignant neoplasm of epididymis                             | Cancer |
| B161.00 | malignant neoplasm of extrahepatic bile ducts                | Cancer |
| B331.00 | malignant neoplasm of eyelid including canthus               | Cancer |
| B441.00 | malignant neoplasm of fallopian tube                         | Cancer |
| B13..00 | malignant neoplasm of colon                                  | Cancer |
| B005.00 | malignant neoplasm of commissure of lip                      | Cancer |
| B161200 | malignant neoplasm of common bile duct                       | Cancer |
| B503.00 | malignant neoplasm of conjunctiva                            | Cancer |
| B504.00 | malignant neoplasm of cornea                                 | Cancer |
| B303400 | malignant neoplasm of costo-vertebral joint                  | Cancer |
| B520.00 | malignant neoplasm of cranial nerves                         | Cancer |
| B050.00 | malignant neoplasm of cheek mucosa                           | Cancer |
| B506.00 | malignant neoplasm of choroid                                | Cancer |
| B135.00 | malignant neoplasm of appendix                               | Cancer |
| B136.00 | malignant neoplasm of ascending colon                        | Cancer |
| B010.00 | malignant neoplasm of base of tongue                         | Cancer |
| B517.00 | malignant neoplasm of brain stem                             | Cancer |
| B517z00 | malignant neoplasm of brain stem nos                         | Cancer |
| B06y000 | malignant neoplasm of branchial cleft                        | Cancer |
| B050.11 | malignant neoplasm of buccal mucosa                          | Cancer |
| B326.00 | malignant melanoma of upper limb and shoulder                | Cancer |
| B082.00 | malignant neoplasm aryepiglottic fold, hypopharyngeal aspect | Cancer |
| B510.00 | malignant neoplasm cerebrum (excluding lobes and ventricles) | Cancer |
| B16..00 | malignant neoplasm gallbladder and extrahepatic bile ducts   | Cancer |
| B16z.00 | malignant neoplasm gallbladder/extrahepatic bile ducts nos   | Cancer |
| B6y..00 | malignant neoplasm lymphatic or haematopoietic tissue os     | Cancer |
| B520200 | malignant neoplasm of acoustic nerve                         | Cancer |
| B162.00 | malignant neoplasm of ampulla of vater                       | Cancer |
| B321.00 | malignant melanoma of eyelid including canthus               | Cancer |
| B315300 | malig neopl of connective and soft tissue - sacrum or coccyx | Cancer |
| B524.00 | malig neopl peripheral nerves and autonomic nervous system   | Cancer |
| B52W.00 | malig neopl, overlap lesion brain & other part of cns        | Cancer |
| B314100 | malig neoplasm of connective and soft tissues of lumb spine  | Cancer |
| B313300 | malig neoplasm of connective and soft tissues of thor spine  | Cancer |
| B623100 | malignant histiocytosis of lymph nodes head, face and neck   | Cancer |
| B623500 | malignant histiocytosis of lymph nodes inguinal and leg      | Cancer |
| B623400 | malignant histiocytosis of lymph nodes of axilla and arm     | Cancer |
| SN5y100 | malignant hypothermia due to anaesthetic                     | Cancer |
| B62y.00 | malignant lymphoma nos                                       | Cancer |
| B62y500 | malignant lymphoma nos of lymph node inguinal region and leg | Cancer |

|         |                                                              |        |
|---------|--------------------------------------------------------------|--------|
| B62y400 | malignant lymphoma nos of lymph nodes of axilla and arm      | Cancer |
| B31y.00 | malig neop connective and soft tissue other specified site   | Cancer |
| B311.00 | malig neop connective and soft tissue upper limb/shoulder    | Cancer |
| B311z00 | malig neop connective soft tissue upper limb/shoulder nos    | Cancer |
| B500.00 | malig neop eyeball excl conjunctiva, cornea, retina, choroid | Cancer |
| B20..00 | malig neop nasal cavities, middle ear and accessory sinuses  | Cancer |
| B3...00 | malig neop of bone, connective tissue, skin and breast       | Cancer |
| B3z..00 | malig neop of bone, connective tissue, skin and breast nos   | Cancer |
| B3y..00 | malig neop of bone, connective tissue, skin and breast os    | Cancer |
| B310.00 | malig neop of connective and soft tissue head, face and neck | Cancer |
| B314z00 | malig neop of connective and soft tissue of abdomen nos      | Cancer |
| B314000 | malig neop of connective and soft tissue of abdominal wall   | Cancer |
| B312600 | malig neop of connective and soft tissue of great toe        | Cancer |
| B312.00 | malig neop of connective and soft tissue of hip and leg      | Cancer |
| B315100 | malig neop of connective and soft tissue of inguinal region  | Cancer |
| B312300 | malig neop of connective and soft tissue of lower leg        | Cancer |
| B315z00 | malig neop of connective and soft tissue of pelvis nos       | Cancer |
| B313z00 | malig neop of connective and soft tissue of thorax nos       | Cancer |
| B312100 | malig neop of connective and soft tissue thigh and upper leg | Cancer |
| B316.00 | malig neop of connective and soft tissue trunk unspecified   | Cancer |
| B54z.00 | malig neop of endocrine gland or related structure nos       | Cancer |
| B4A..00 | malig neop of kidney and other unspecified urinary organs    | Cancer |
| B45..00 | malig neop of other and unspecified female genital organs    | Cancer |
| B52..00 | malig neop of other and unspecified parts of nervous system  | Cancer |
| B54..00 | malig neop of other endocrine glands and related structures  | Cancer |
| B24y.00 | malig neop of other site of heart, thymus and mediastinum    | Cancer |
| B2...00 | malig neop of respiratory tract and intrathoracic organs     | Cancer |
| B304z00 | malig neop of scapula and long bones of upper arm nos        | Cancer |
| B2z0.00 | malig neop of upper respiratory tract, part unspecified      | Cancer |
| B1z..00 | malig neop oth/ill-defined sites digestive tract/peritoneum  | Cancer |
| B20y.00 | malig neop other site nasal cavity, middle ear and sinuses   | Cancer |
| B14y.00 | malig neop other site rectum, rectosigmoid junction and anus | Cancer |
| B0z..00 | malig neop other/ill-defined sites lip, oral cavity, pharynx | Cancer |
| B2z..00 | malig neop other/ill-defined sites resp/intrathoracic organs | Cancer |
| B332z00 | malig neop skin of ear and external auricular canal nos      | Cancer |
| B25..00 | malig neo, overlapping lesion of heart, mediastinum & pleura | Cancer |
| B201.00 | malig neop auditory tube, middle ear and mastoid air cells   | Cancer |
| B201z00 | malig neop auditory tube, middle ear, mastoid air cells nos  | Cancer |
| B310z00 | malig neop connective and soft tissue head, face, neck nos   | Cancer |
| B542z00 | malig neop pituitary gland or craniopharyngeal duct nos      | Cancer |
| B312z00 | malig neop connective and soft tissue hip and leg nos        | Cancer |
| B312200 | malig neop connective and soft tissue of popliteal space     | Cancer |
| B524W00 | mal neoplasm/periph nerves+autonomic nervous system,unspc    | Cancer |
| B67y000 | lymphosarcoma cell leukaemia                                 | Cancer |
| B601500 | lymphosarcoma of lymph nodes of inguinal region and leg      | Cancer |
| B56..11 | lymph node metastases                                        | Cancer |



|         |                                                              |        |
|---------|--------------------------------------------------------------|--------|
| B22z.11 | lung cancer                                                  | Cancer |
| B577.11 | liver metastases                                             | Cancer |
| B624800 | leukaemic reticuloend of lymph nodes of multiple sites       | Cancer |
| B624.00 | leukaemic reticuloendotheliosis                              | Cancer |
| B624.11 | leukaemic reticuloendotheliosis                              | Cancer |
| B625.00 | letterer-siwe disease                                        | Cancer |
| B625500 | letterer-siwe disease of lymph nodes inguinal region and leg | Cancer |
| B625400 | letterer-siwe disease of lymph nodes of axilla and arm       | Cancer |
| B625100 | letterer-siwe disease of lymph nodes of head, face and neck  | Cancer |
| B624300 | leukaemic reticuloend of intra-abdominal lymph nodes         | Cancer |
| B624500 | leukaemic reticuloend of lymph nodes inguinal region and leg | Cancer |
| B624400 | leukaemic reticuloend of lymph nodes of axilla and arm       | Cancer |
| B624100 | leukaemic reticuloend of lymph nodes of head, face and neck  | Cancer |
| B592X00 | kaposi's sarcoma of multiple organs                          | Cancer |
| B59zX00 | kaposi's sarcoma, unspecified                                | Cancer |
| B627C11 | follicular lymphoma nos                                      | Cancer |
| B627100 | follicular non-hodg mixed sml cleavd & lge cell lymphoma     | Cancer |
| B11..11 | gastric neoplasm                                             | Cancer |
| B62z300 | unspec malig neop lymphoid/histiocytic intra-abdominal nodes | Cancer |
| B62z400 | unspec malig neop lymphoid/histiocytic lymph node axilla/arm | Cancer |
| B62z100 | unspec malig neop lymphoid/histiocytic lymph node head/neck  | Cancer |
| B62z500 | unspec malig neop lymphoid/histiocytic nodes inguinal/leg    | Cancer |
| B62z600 | unspec malig neop lymphoid/histiocytic of intrapelvic nodes  | Cancer |
| B62z200 | unspec malig neop lymphoid/histiocytic of intrathoracic node | Cancer |
| B62z800 | unspec malig neop lymphoid/histiocytic of multiple sites     | Cancer |
| B62z700 | unspec malig neop lymphoid/histiocytic of spleen             | Cancer |
| B62z000 | unspec malig neop lymphoid/histiocytic of unspecified site   | Cancer |
| B671.11 | heilmeyer - schoner disease                                  | Cancer |
| B627W00 | unspecified b-cell non-hodgkin's lymphoma                    | Cancer |
| B935.11 | histiocytic tumour nos                                       | Cancer |
| B625.11 | histiocytosis x (acute, progressive)                         | Cancer |
| A789700 | hiv dis resulting oth types of non-hodgkin's lymphoma        | Cancer |
| A789500 | hiv disease resulting in kaposi's sarcoma                    | Cancer |
| A788W00 | hiv disease resulting in unspecified malignant neoplasm      | Cancer |
| B61z.00 | hodgkin's disease nos                                        | Cancer |
| B61z500 | hodgkin's disease nos of lymph nodes inguinal region and leg | Cancer |
| B61z400 | hodgkin's disease nos of lymph nodes of axilla and arm       | Cancer |
| B613.00 | hodgkin's disease, lymphocytic-histiocytic predominance      | Cancer |
| B611500 | hodgkin's granuloma lymph nodes of inguinal region and leg   | Cancer |
| B616300 | hodgkin's lymphocytic depletion intra-abdominal lymph nodes  | Cancer |
| B616400 | hodgkin's lymphocytic depletion lymph nodes axilla and arm   | Cancer |
| B616500 | hodgkin's lymphocytic depletion lymph nodes inguinal and leg | Cancer |
| B616800 | hodgkin's lymphocytic depletion lymph nodes multiple sites   | Cancer |
| B616100 | hodgkin's lymphocytic depletion of head, face and neck       | Cancer |
| B616600 | hodgkin's lymphocytic depletion of intrapelvic lymph nodes   | Cancer |
| B616200 | hodgkin's lymphocytic depletion of intrathoracic lymph nodes | Cancer |

|         |                                                              |        |
|---------|--------------------------------------------------------------|--------|
| B615300 | hodgkin's mixed cellularity of intra-abdominal lymph nodes   | Cancer |
| B615600 | hodgkin's mixed cellularity of intrapelvic lymph nodes       | Cancer |
| B615200 | hodgkin's mixed cellularity of intrathoracic lymph nodes     | Cancer |
| B615100 | hodgkin's mixed cellularity of lymph nodes head, face, neck  | Cancer |
| B615500 | hodgkin's mixed cellularity of lymph nodes inguinal and leg  | Cancer |
| B615400 | hodgkin's mixed cellularity of lymph nodes of axilla and arm | Cancer |
| B615800 | hodgkin's mixed cellularity of lymph nodes of multiple sites | Cancer |
| B614100 | hodgkin's nodular sclerosis of head, face and neck           | Cancer |
| B614500 | hodgkin's nodular sclerosis of inguinal region and leg       | Cancer |
| B614300 | hodgkin's nodular sclerosis of intra-abdominal lymph nodes   | Cancer |
| B614600 | hodgkin's nodular sclerosis of intrapelvic lymph nodes       | Cancer |
| B614200 | hodgkin's nodular sclerosis of intrathoracic lymph nodes     | Cancer |
| B614400 | hodgkin's nodular sclerosis of lymph nodes of axilla and arm | Cancer |
| B614800 | hodgkin's nodular sclerosis of lymph nodes of multiple sites | Cancer |
| B610.00 | hodgkin's paragranuloma                                      | Cancer |
| B610500 | hodgkin's paragranuloma lymph nodes inguinal region and leg  | Cancer |
| B610400 | hodgkin's paragranuloma of lymph nodes of axilla and arm     | Cancer |
| B610100 | hodgkin's paragranuloma of lymph nodes of head, face, neck   | Cancer |
| B612500 | hodgkin's sarcoma of lymph nodes of inguinal region and leg  | Cancer |
| B613400 | hodgkin's, lymphocytic-histiocytic pred axilla and arm       | Cancer |
| B613500 | hodgkin's, lymphocytic-histiocytic pred inguinal and leg     | Cancer |
| B613300 | hodgkin's, lymphocytic-histiocytic pred intra-abdominal node | Cancer |
| B613600 | hodgkin's, lymphocytic-histiocytic pred intrapelvic nodes    | Cancer |
| B613200 | hodgkin's, lymphocytic-histiocytic pred intrathoracic nodes  | Cancer |
| B613100 | hodgkin's, lymphocytic-histiocytic pred of head, face, neck  | Cancer |
| B613800 | hodgkin's, lymphocytic-histiocytic pred of multiple sites    | Cancer |
| B613000 | hodgkin's, lymphocytic-histiocytic predominance unspec site  | Cancer |
| B1z0.11 | cancer of bowel                                              | Cancer |
| 4M71.00 | clark melanoma level 2                                       | Cancer |
| 4M2..00 | lymphoma staging system                                      | Cancer |
| 1409C   | lip carcinoma                                                | Cancer |
| 1419C   | tongue carcinoma                                             | Cancer |
| 174 C   | carcinoma breast                                             | Cancer |
| 188 C   | carcinoma bladder                                            | Cancer |
| 209     | myelofibrosis                                                | Cancer |
| 4M22.00 | lymphoma stage iii                                           | Cancer |
| C37yB00 | langerhans' cell histiocytosis                               | Cancer |
| B430211 | malignant neoplasm of endometrium                            | Cancer |
| 2020FL  | follicular lymphoma                                          | Cancer |
| 2021    | mycosis fungoides                                            | Cancer |
| 203 T   | myelomatosis                                                 | Cancer |
| 203 A   | solitary myeloma                                             | Cancer |
| 201     | hodgkin's disease                                            | Cancer |
| 2072DG  | di guglielmo's disease                                       | Cancer |
| 2001    | lymphosarcoma                                                | Cancer |
| 1560C   | carcinoma gallbladder                                        | Cancer |

|         |                                                              |                   |
|---------|--------------------------------------------------------------|-------------------|
| 203 KA  | kahler's disease                                             | Cancer            |
| 201 G   | hodgkin's granuloma                                          | Cancer            |
| 2022CL  | chloroma                                                     | Cancer            |
| 2079MK  | megakaryocytic leukaemia                                     | Cancer            |
| 2059M   | myeloid leukaemia                                            | Cancer            |
| 1991MT  | mesothelioma                                                 | Cancer            |
| 1890CH  | hypernephroma                                                | Cancer            |
| 1976A   | malignant ascites                                            | Cancer            |
| 9hF1.00 | excepted from atrial fibrillation qual indic: inform dissent | Cardiac arrythmia |
| G562100 | left posterior fascicular block                              | Cardiac arrythmia |
| G562.11 | left bundle branch block                                     | Cardiac arrythmia |
| G566000 | sinoatrial block                                             | Cardiac arrythmia |
| G571.00 | paroxysmal ventricular tachycardia                           | Cardiac arrythmia |
| G570.00 | paroxysmal supraventricular tachycardia                      | Cardiac arrythmia |
| G576100 | supraventricular ectopic beats                               | Cardiac arrythmia |
| G57y600 | nodal rhythm disorder                                        | Cardiac arrythmia |
| G574000 | ventricular fibrillation                                     | Cardiac arrythmia |
| ZV53013 | [v]fitting or adjustment of neuropacemaker device            | Cardiac arrythmia |
| G565500 | bifascicular block                                           | Cardiac arrythmia |
| G57..00 | cardiac dysrhythmias                                         | Cardiac arrythmia |
| G57..11 | cardiac arrhythmias                                          | Cardiac arrythmia |
| G561311 | mobitz type 1 second degree atrioventricular block           | Cardiac arrythmia |
| G56y400 | right fascicular block                                       | Cardiac arrythmia |
| G567400 | wolff-parkinson-white syndrome                               | Cardiac arrythmia |
| G565400 | trifascicular block                                          | Cardiac arrythmia |
| 7936G00 | implantat intraven single chamber cardiac pacemaker system   | Cardiac arrythmia |
| 7936H00 | implantat intravenous dual chamber cardiac pacemaker system  | Cardiac arrythmia |
| 7936J00 | implantat intravenous biventricular cardiac pacemaker system | Cardiac arrythmia |
| 793M100 | perc transluminal ablation of atrial wall for atrial flutter | Cardiac arrythmia |
| 793M300 | perc translum ablat conduct sys heart for atrial flutter nec | Cardiac arrythmia |
| G565200 | right bbb with left anterior fascicular block                | Cardiac arrythmia |
| G565100 | right bbb with left posterior fascicular block               | Cardiac arrythmia |
| G566200 | right fascicular block                                       | Cardiac arrythmia |
| 8HRF.00 | referral for cardiac pacemaker check                         | Cardiac arrythmia |
| G55A.00 | tachycardiomyopathy                                          | Cardiac arrythmia |
| 329B.00 | ecg: trifascicular block                                     | Cardiac arrythmia |
| 329C.00 | ecg: bifascicular block                                      | Cardiac arrythmia |
| 329D.00 | ecg: left anterior fascicular block                          | Cardiac arrythmia |
| 329E.00 | ecg: left posterior fascicular block                         | Cardiac arrythmia |
| 329F.00 | ecg: right bundle branch and left anterior fascicular block  | Cardiac arrythmia |
| 329G.00 | ecg: right bundle branch and left posterior fascicular block | Cardiac arrythmia |
| 8HTy.00 | referral to atrial fibrillation clinic                       | Cardiac arrythmia |
| 3297.11 | electrocardiogram: mobitz type 1 second degree av block      | Cardiac arrythmia |
| 329H.00 | electrocardiogram: mobitz type 2 second degree av block      | Cardiac arrythmia |
| 7936F00 | renewal of intravenous cardiac pacemaker system              | Cardiac arrythmia |
| G574100 | ventricular flutter                                          | Cardiac arrythmia |

|         |                                                             |                   |
|---------|-------------------------------------------------------------|-------------------|
| 2JS..00 | patient with internal cardiac defibrillator pacemaker       | Cardiac arrythmia |
| 7936400 | removal of intravenous cardiac pacemaker system             | Cardiac arrythmia |
| G572100 | bouveret-hoffmann syndrome                                  | Cardiac arrythmia |
| G572000 | essential paroxysmal tachycardia                            | Cardiac arrythmia |
| G56y600 | pacemaker twiddler's syndrome                               | Cardiac arrythmia |
| G576.11 | premature beats                                             | Cardiac arrythmia |
| 662S.00 | atrial fibrillation monitoring                              | Cardiac arrythmia |
| G56..11 | conduction disorders of heart                               | Cardiac arrythmia |
| 8CMW200 | atrial fibrillation care pathway                            | Cardiac arrythmia |
| G56..00 | conduction disorders                                        | Cardiac arrythmia |
| 8OAD.00 | provision of written information about atrial fibrillation  | Cardiac arrythmia |
| 14AD.00 | h/o ventricular fibrillation                                | Cardiac arrythmia |
| 14V1.00 | h/o: cardiac pacemaker in situ                              | Cardiac arrythmia |
| 14V1.11 | h/o: cardiac pacemaker                                      | Cardiac arrythmia |
| 3264.00 | ecg: atrial ectopics                                        | Cardiac arrythmia |
| 327..00 | ecg: supraventricular arrhythmia                            | Cardiac arrythmia |
| 3272.00 | ecg: atrial fibrillation                                    | Cardiac arrythmia |
| 3273.00 | ecg: atrial flutter                                         | Cardiac arrythmia |
| 3274.00 | ecg: paroxysmal atrial tachy.                               | Cardiac arrythmia |
| 327Z.00 | ecg: supraventric. arryth. nos                              | Cardiac arrythmia |
| 328..00 | ecg: ventricular arrhythmia                                 | Cardiac arrythmia |
| 3282.00 | ecg: ventricular tachycardia                                | Cardiac arrythmia |
| 3283.00 | ecg: ventricular fibrillation                               | Cardiac arrythmia |
| 328Z.00 | ecg: ventricular arrhythmia nos                             | Cardiac arrythmia |
| 329..00 | ecg: heart block                                            | Cardiac arrythmia |
| 3297.00 | ecg: wenckebach phenomenon                                  | Cardiac arrythmia |
| 3299.00 | ecg: right bundle branch block                              | Cardiac arrythmia |
| 329A.00 | ecg: left bundle branch block                               | Cardiac arrythmia |
| 329Z.00 | ecg: heart block nos                                        | Cardiac arrythmia |
| 32D2.00 | ecg: s wave abnormal                                        | Cardiac arrythmia |
| 32F2.00 | ecg: t wave abnormal                                        | Cardiac arrythmia |
| 32I2.00 | ecg: p-r interval abnormal                                  | Cardiac arrythmia |
| 32J2.00 | ecg: qrs complex abnormal                                   | Cardiac arrythmia |
| 32K2.00 | ecg: q-t interval abnormal                                  | Cardiac arrythmia |
| G576200 | ventricular ectopic beats                                   | Cardiac arrythmia |
| G55A.11 | tachycardia-induced cardiomyopathy                          | Cardiac arrythmia |
| 7L1H700 | external ventricular defibrillation                         | Cardiac arrythmia |
| G573600 | paroxysmal atrial flutter                                   | Cardiac arrythmia |
| 14AR.00 | history of atrial flutter                                   | Cardiac arrythmia |
| 7937900 | implantation of biventricular cardiac pacemaker system      | Cardiac arrythmia |
| 7930000 | open ablation of atrioventricular node                      | Cardiac arrythmia |
| 7934000 | percutaneous transluminal ablation of atrioventricular node | Cardiac arrythmia |
| 7936.11 | introduction of intravenous cardiac pacemaker system        | Cardiac arrythmia |
| 7936000 | implantation of intravenous cardiac pacemaker system        | Cardiac arrythmia |
| 7936100 | resiting of lead of intravenous pacemaker system            | Cardiac arrythmia |
| 7936300 | maintenance of intravenous cardiac pacemaker system nec     | Cardiac arrythmia |

|         |                                                              |                    |
|---------|--------------------------------------------------------------|--------------------|
| 7936600 | implantation of permanent intravenous cardiac pacemaker      | Cardiac arrhythmia |
| 7936700 | implantation of intravenous fixed-rate cardiac pacemaker     | Cardiac arrhythmia |
| 7936800 | implantation of intravenous triggered cardiac pacemaker      | Cardiac arrhythmia |
| 7936900 | implantation of intravenous atrial overdrive pacemaker       | Cardiac arrhythmia |
| 7936y00 | other specified cardiac pacemaker system introduced via vein | Cardiac arrhythmia |
| 7936z00 | cardiac pacemaker system introduced via vein nos             | Cardiac arrhythmia |
| 7937.00 | other cardiac pacemaker system                               | Cardiac arrhythmia |
| 7937000 | implantation of cardiac pacemaker system nec                 | Cardiac arrhythmia |
| 7937100 | resiting of lead of cardiac pacemaker system nec             | Cardiac arrhythmia |
| 7937200 | maintenance of battery of cardiac pacemaker system nec       | Cardiac arrhythmia |
| 7937300 | maintenance of cardiac pacemaker system nec                  | Cardiac arrhythmia |
| 7937400 | removal of cardiac pacemaker system nec                      | Cardiac arrhythmia |
| 7937y00 | other specified other cardiac pacemaker system               | Cardiac arrhythmia |
| 7937z00 | other cardiac pacemaker system nos                           | Cardiac arrhythmia |
| G567000 | accelerated atrioventricular conduction                      | Cardiac arrhythmia |
| 9hF..00 | exception reporting: atrial fibrillation quality indicators  | Cardiac arrhythmia |
| 212R.00 | atrial fibrillation resolved                                 | Cardiac arrhythmia |
| G561.00 | partial atrioventricular block                               | Cardiac arrhythmia |
| G561000 | atrioventricular block unspecified                           | Cardiac arrhythmia |
| G561400 | second degree atrioventricular block                         | Cardiac arrhythmia |
| G561z00 | atrioventricular block nos                                   | Cardiac arrhythmia |
| G562z00 | left bundle branch hemiblock nos                             | Cardiac arrhythmia |
| G563.00 | left main stem bundle branch block                           | Cardiac arrhythmia |
| G565.00 | other bundle branch block                                    | Cardiac arrhythmia |
| G565000 | bundle branch block unspecified                              | Cardiac arrhythmia |
| G565300 | other bilateral bundle branch block                          | Cardiac arrhythmia |
| G565z00 | other bundle branch block nos                                | Cardiac arrhythmia |
| G566.00 | other heart block                                            | Cardiac arrhythmia |
| G566100 | interventricular block nos                                   | Cardiac arrhythmia |
| G566z00 | other heart block nos                                        | Cardiac arrhythmia |
| G567300 | ventricular pre-excitation                                   | Cardiac arrhythmia |
| G567z00 | anomalous atrioventricular excitation nos                    | Cardiac arrhythmia |
| G56y.00 | other conduction disorders                                   | Cardiac arrhythmia |
| G56yz00 | other conduction disorders nos                               | Cardiac arrhythmia |
| G56z.00 | conduction disorders unspecified                             | Cardiac arrhythmia |
| G56zz00 | conduction disorders nos                                     | Cardiac arrhythmia |
| G570000 | paroxysmal atrial tachycardia                                | Cardiac arrhythmia |
| G570100 | paroxysmal atrioventricular tachycardia                      | Cardiac arrhythmia |
| G570200 | paroxysmal junctional tachycardia                            | Cardiac arrhythmia |
| G570300 | paroxysmal nodal tachycardia                                 | Cardiac arrhythmia |
| G570z00 | paroxysmal supraventricular tachycardia nos                  | Cardiac arrhythmia |
| G572.00 | paroxysmal tachycardia unspecified                           | Cardiac arrhythmia |
| G572z00 | paroxysmal tachycardia nos                                   | Cardiac arrhythmia |
| G573.00 | atrial fibrillation and flutter                              | Cardiac arrhythmia |
| G573z00 | atrial fibrillation and flutter nos                          | Cardiac arrhythmia |
| G574.00 | ventricular fibrillation and flutter                         | Cardiac arrhythmia |

|         |                                                              |                   |
|---------|--------------------------------------------------------------|-------------------|
| G574z00 | ventricular fibrillation and flutter nos                     | Cardiac arrythmia |
| G57y400 | sinoatrial node dysfunction nos                              | Cardiac arrythmia |
| G57y500 | wandering atrial pacemaker                                   | Cardiac arrythmia |
| G57y900 | supraventricular tachycardia nos                             | Cardiac arrythmia |
| G57yA00 | re-entry ventricular arrhythmia                              | Cardiac arrythmia |
| G57yz00 | other cardiac dysrhythmia nos                                | Cardiac arrythmia |
| G57z.00 | cardiac dysrhythmia nos                                      | Cardiac arrythmia |
| Gyu5U00 | [x]other and unspecified atrioventricular block              | Cardiac arrythmia |
| Gyu5V00 | [x]other and unspecified fascicular block                    | Cardiac arrythmia |
| Gyu5W00 | [x]other and unspecified right bundle-branch block           | Cardiac arrythmia |
| Gyu5X00 | [x]other specified heart block                               | Cardiac arrythmia |
| Gyu5Y00 | [x]other specified conduction disorders                      | Cardiac arrythmia |
| Gyu5a00 | [x]other specified cardiac arrhythmias                       | Cardiac arrythmia |
| G567.00 | anomalous atrioventricular excitation                        | Cardiac arrythmia |
| 14AP.00 | history of ventricular tachycardia                           | Cardiac arrythmia |
| 14AQ.00 | history of supraventricular tachycardia                      | Cardiac arrythmia |
| P6y5000 | congenital heart block, unspecified                          | Cardiac arrythmia |
| SP00100 | mechanical complication of cardiac pacemaker                 | Cardiac arrythmia |
| G573300 | non-rheumatic atrial fibrillation                            | Cardiac arrythmia |
| G56..12 | heart block                                                  | Cardiac arrythmia |
| 7P19.00 | pacemaker testing                                            | Cardiac arrythmia |
| G576400 | junctional premature depolarization                          | Cardiac arrythmia |
| G576500 | ventricular premature depolarization                         | Cardiac arrythmia |
| 7937700 | implantation of single chamber cardiac pacemaker system      | Cardiac arrythmia |
| 7937800 | implantation of dual chamber cardiac pacemaker system        | Cardiac arrythmia |
| 7P19y00 | other specified pacemaker testing                            | Cardiac arrythmia |
| 7P19z00 | pacemaker testing nos                                        | Cardiac arrythmia |
| 7P19000 | distant pacemaker test                                       | Cardiac arrythmia |
| 7936500 | implantation of emergency intravenous cardiac pacemaker      | Cardiac arrythmia |
| G57y.00 | other cardiac dysrhythmias                                   | Cardiac arrythmia |
| G561100 | first degree atrioventricular block                          | Cardiac arrythmia |
| 90s..00 | atrial fibrillation monitoring administration                | Cardiac arrythmia |
| 6A9..00 | atrial fibrillation annual review                            | Cardiac arrythmia |
| 90s0.00 | atrial fibrillation monitoring first letter                  | Cardiac arrythmia |
| 90s1.00 | atrial fibrillation monitoring second letter                 | Cardiac arrythmia |
| 90s2.00 | atrial fibrillation monitoring third letter                  | Cardiac arrythmia |
| 90s3.00 | atrial fibrillation monitoring verbal invite                 | Cardiac arrythmia |
| 90s4.00 | atrial fibrillation monitoring telephone invite              | Cardiac arrythmia |
| G559.00 | arrhythmogenic right ventricular cardiomyopathy              | Cardiac arrythmia |
| G573200 | paroxysmal atrial fibrillation                               | Cardiac arrythmia |
| G576300 | atrial premature depolarization                              | Cardiac arrythmia |
| G571.11 | ventricular tachycardia                                      | Cardiac arrythmia |
| 7936511 | implantation of temporary intravenous cardiac pacemaker      | Cardiac arrythmia |
| 7936E00 | implantation of intravenous dual chamber permanent pacemaker | Cardiac arrythmia |
| 14AN.00 | h/o: atrial fibrillation                                     | Cardiac arrythmia |
| 9N2b.00 | seen by cardiac pacemaker technician                         | Cardiac arrythmia |

|         |                                                              |                         |
|---------|--------------------------------------------------------------|-------------------------|
| ZV45000 | [v]cardiac pacemaker in situ                                 | Cardiac arrythmia       |
| ZV53300 | [v]fitting or adjustment of cardiac pacemaker                | Cardiac arrythmia       |
| G560.00 | complete atrioventricular block                              | Cardiac arrythmia       |
| G560.11 | third degree atrioventricular block                          | Cardiac arrythmia       |
| G561200 | mobitz type ii atrioventricular block                        | Cardiac arrythmia       |
| G567200 | pre-excitation atrioventricular conduction                   | Cardiac arrythmia       |
| G567100 | accessory atrioventricular conduction                        | Cardiac arrythmia       |
| ZV45M00 | [v]biventricular pacemaker in situ                           | Cardiac arrythmia       |
| G56y100 | atrioventricular dissociation                                | Cardiac arrythmia       |
| G574011 | cardiac arrest-ventricular fibrillation                      | Cardiac arrythmia       |
| P6y5100 | congenital complete atrio-ventricular heart block            | Cardiac arrythmia       |
| P6y5200 | congenital incomplete atrio-ventricular heart block          | Cardiac arrythmia       |
| 7L1H.13 | defibrillation                                               | Cardiac arrythmia       |
| G562000 | left anterior fascicular block                               | Cardiac arrythmia       |
| 3298.00 | ecg: complete a-v block                                      | Cardiac arrythmia       |
| 32I3.00 | ecg: p-r interval prolonged                                  | Cardiac arrythmia       |
| 3295.00 | ecg: partial a-v block - 2:1                                 | Cardiac arrythmia       |
| 3296.00 | ecg: partial a-v block - 3:1                                 | Cardiac arrythmia       |
| 3292.00 | ecg: partial sinu-atrial block                               | Cardiac arrythmia       |
| 32K3.00 | ecg: q-t interval prolonged                                  | Cardiac arrythmia       |
| 32K4.00 | ecg: q-t interval shortened                                  | Cardiac arrythmia       |
| 32J3.00 | ecg: qrs complex prolonged                                   | Cardiac arrythmia       |
| 3293.00 | ecg:complete sinu-atrial block                               | Cardiac arrythmia       |
| 3294.00 | ecg:partial a-v block-long p-r                               | Cardiac arrythmia       |
| G573500 | persistent atrial fibrillation                               | Cardiac arrythmia       |
| G573400 | permanent atrial fibrillation                                | Cardiac arrythmia       |
| Q491.00 | neonatal cardiac dysrhythmia                                 | Cardiac arrythmia       |
| G561300 | mobitz type i (wenckebach) atrioventricular block            | Cardiac arrythmia       |
| 7936200 | maintenance of battery of intravenous cardiac pacemaker syst | Cardiac arrythmia       |
| 7936K00 | implantation of intravenous cardiac pacemaker system nec     | Cardiac arrythmia       |
| P6y5.00 | congenital heart block                                       | Cardiac arrythmia       |
| 7936B00 | implantation simple one wire intravenous cardiac pacemaker   | Cardiac arrythmia       |
| 7936A00 | implant intravenous pacemaker for atrial fibrillation        | Cardiac arrythmia       |
| TB01000 | implant of cardiac pacemaker with complication, no blame     | Cardiac arrythmia       |
| 7936D00 | implantation complex two wire intravenous cardiac pacemaker  | Cardiac arrythmia       |
| 7936C00 | implantation of complex 1 wire intravenous cardiac pacemaker | Cardiac arrythmia       |
| G573000 | atrial fibrillation                                          | Cardiac arrythmia       |
| G56y000 | lown-ganong-levine syndrome                                  | Cardiac arrythmia       |
| G562.00 | left bundle branch hemiblock                                 | Cardiac arrythmia       |
| G564.00 | right bundle branch block                                    | Cardiac arrythmia       |
| G573100 | atrial flutter                                               | Cardiac arrythmia       |
| G6...00 | cerebrovascular disease                                      | Cerebrovascular disease |
| G650.00 | basilar artery syndrome                                      | Cerebrovascular disease |
| G656.00 | vertebrobasilar insufficiency                                | Cerebrovascular disease |
| G634.00 | carotid artery stenosis                                      | Cerebrovascular disease |
| G679.00 | small vessel cerebrovascular disease                         | Cerebrovascular disease |

|         |                                                              |                         |
|---------|--------------------------------------------------------------|-------------------------|
| 8CRB.00 | transient ischaemic attack clinical management plan          | Cerebrovascular disease |
| 662M100 | stroke 6 month review                                        | Cerebrovascular disease |
| G640.00 | cerebral thrombosis                                          | Cerebrovascular disease |
| G64..00 | cerebral arterial occlusion                                  | Cerebrovascular disease |
| G64..13 | stroke due to cerebral arterial occlusion                    | Cerebrovascular disease |
| G61..12 | stroke due to intracerebral haemorrhage                      | Cerebrovascular disease |
| G66..12 | stroke unspecified                                           | Cerebrovascular disease |
| ZV12511 | [v]personal history of stroke                                | Cerebrovascular disease |
| ZV12512 | [v]personal history of cerebrovascular accident (cva)        | Cerebrovascular disease |
| G70y011 | carotid artery disease                                       | Cerebrovascular disease |
| G60X.00 | subarachnoid haemorrh from intracranial artery, unspecif     | Cerebrovascular disease |
| G603.00 | subarachnoid haemorrhage from anterior communicating artery  | Cerebrovascular disease |
| G605.00 | subarachnoid haemorrhage from basilar artery                 | Cerebrovascular disease |
| G602.00 | subarachnoid haemorrhage from middle cerebral artery         | Cerebrovascular disease |
| G604.00 | subarachnoid haemorrhage from posterior communicating artery | Cerebrovascular disease |
| G641.00 | cerebral embolism                                            | Cerebrovascular disease |
| G63..12 | stenosis of precerebral arteries                             | Cerebrovascular disease |
| G631.11 | stenosis, carotid artery                                     | Cerebrovascular disease |
| G64z111 | lateral medullary syndrome                                   | Cerebrovascular disease |
| 9h2..00 | exception reporting: stroke quality indicators               | Cerebrovascular disease |
| 9h21.00 | excepted from stroke quality indicators: patient unsuitable  | Cerebrovascular disease |
| 9h22.00 | excepted from stroke quality indicators: informed dissent    | Cerebrovascular disease |
| G682.00 | sequelae of other nontraumatic intracranial haemorrhage      | Cerebrovascular disease |
| G68X.00 | sequelae of stroke,not specfd as h'morrhage or infarction    | Cerebrovascular disease |
| G68W.00 | sequelae/other + unspecified cerebrovascular diseases        | Cerebrovascular disease |
| G64z.12 | cerebellar infarction                                        | Cerebrovascular disease |
| G61X100 | right sided intracerebral haemorrhage, unspecified           | Cerebrovascular disease |
| 662e.00 | stroke/cva annual review                                     | Cerebrovascular disease |
| 38G3.00 | hyperten, abnorm renal/liver funct, stroke, bled score       | Cerebrovascular disease |
| 8IEC.00 | ref multidisciplinary stroke function improvement declined   | Cerebrovascular disease |
| L440300 | puerperal cerebrovascular disorder with antenatal comp       | Cerebrovascular disease |
| 661M700 | stroke self-management plan agreed                           | Cerebrovascular disease |
| 662e.11 | stroke annual review                                         | Cerebrovascular disease |
| 5C10.00 | carotid artery doppler abnormal                              | Cerebrovascular disease |
| G64..12 | infarction - cerebral                                        | Cerebrovascular disease |
| 9Om..00 | stroke/transient ischaemic attack monitoring administration  | Cerebrovascular disease |
| 8HBJ.00 | stroke / transient ischaemic attack referral                 | Cerebrovascular disease |
| G64z400 | infarction of basal ganglia                                  | Cerebrovascular disease |
| 13YA.00 | stroke group member                                          | Cerebrovascular disease |
| 14A7.12 | h/o: stroke                                                  | Cerebrovascular disease |
| 9Om2.00 | stroke/transient ischaemic attack monitoring third letter    | Cerebrovascular disease |
| G623.00 | subdural haemorrhage nos                                     | Cerebrovascular disease |
| 9Om1.00 | stroke/transient ischaemic attack monitoring second letter   | Cerebrovascular disease |
| 9Om0.00 | stroke/transient ischaemic attack monitoring first letter    | Cerebrovascular disease |
| 662o.00 | haemorrhagic stroke monitoring                               | Cerebrovascular disease |
| 662M.00 | stroke monitoring                                            | Cerebrovascular disease |



|         |                                                              |                         |
|---------|--------------------------------------------------------------|-------------------------|
| 7004300 | evacuation of intracerebral haematoma nec                    | Cerebrovascular disease |
| G677400 | occlusion+stenosis of multiple and bilat cerebral arteries   | Cerebrovascular disease |
| G677.00 | occlusion/stenosis cerebral arts not result cerebral infarct | Cerebrovascular disease |
| 7A20311 | carotid endarterectomy and patch                             | Cerebrovascular disease |
| 7A20400 | endarterectomy of carotid artery nec                         | Cerebrovascular disease |
| E030400 | acute confusional state, of cerebrovascular origin           | Cerebrovascular disease |
| E031400 | subacute confusional state, of cerebrovascular origin        | Cerebrovascular disease |
| F11x200 | cerebral degeneration due to cerebrovascular disease         | Cerebrovascular disease |
| G600.00 | ruptured berry aneurysm                                      | Cerebrovascular disease |
| G601.00 | subarachnoid haemorrhage from carotid siphon and bifurcation | Cerebrovascular disease |
| G606.00 | subarachnoid haemorrhage from vertebral artery               | Cerebrovascular disease |
| G60z.00 | subarachnoid haemorrhage nos                                 | Cerebrovascular disease |
| G616.00 | external capsule haemorrhage                                 | Cerebrovascular disease |
| G617.00 | intracerebral haemorrhage, intraventricular                  | Cerebrovascular disease |
| G61z.00 | intracerebral haemorrhage nos                                | Cerebrovascular disease |
| G62..00 | other and unspecified intracranial haemorrhage               | Cerebrovascular disease |
| G621.00 | subdural haemorrhage - nontraumatic                          | Cerebrovascular disease |
| G62z.00 | intracranial haemorrhage nos                                 | Cerebrovascular disease |
| G630.00 | basilar artery occlusion                                     | Cerebrovascular disease |
| G632.00 | vertebral artery occlusion                                   | Cerebrovascular disease |
| G633.00 | multiple and bilateral precerebral arterial occlusion        | Cerebrovascular disease |
| G63y.00 | other precerebral artery occlusion                           | Cerebrovascular disease |
| G63y000 | cerebral infarct due to thrombosis of precerebral arteries   | Cerebrovascular disease |
| G63y100 | cerebral infarction due to embolism of precerebral arteries  | Cerebrovascular disease |
| G63z.00 | precerebral artery occlusion nos                             | Cerebrovascular disease |
| G640000 | cerebral infarction due to thrombosis of cerebral arteries   | Cerebrovascular disease |
| G641000 | cerebral infarction due to embolism of cerebral arteries     | Cerebrovascular disease |
| G653.00 | carotid artery syndrome hemispheric                          | Cerebrovascular disease |
| G654.00 | multiple and bilateral precerebral artery syndromes          | Cerebrovascular disease |
| G65y.00 | other transient cerebral ischaemia                           | Cerebrovascular disease |
| G65zz00 | transient cerebral ischaemia nos                             | Cerebrovascular disease |
| G65z100 | intermittent cerebral ischaemia                              | Cerebrovascular disease |
| G660.00 | middle cerebral artery syndrome                              | Cerebrovascular disease |
| G661.00 | anterior cerebral artery syndrome                            | Cerebrovascular disease |
| G662.00 | posterior cerebral artery syndrome                           | Cerebrovascular disease |
| G664.00 | cerebellar stroke syndrome                                   | Cerebrovascular disease |
| G667.00 | left sided cva                                               | Cerebrovascular disease |
| G668.00 | right sided cva                                              | Cerebrovascular disease |
| G67..00 | other cerebrovascular disease                                | Cerebrovascular disease |
| G671z00 | generalised ischaemic cerebrovascular disease nos            | Cerebrovascular disease |
| G671000 | acute cerebrovascular insufficiency nos                      | Cerebrovascular disease |
| G677000 | occlusion and stenosis of middle cerebral artery             | Cerebrovascular disease |
| G677100 | occlusion and stenosis of anterior cerebral artery           | Cerebrovascular disease |
| G677200 | occlusion and stenosis of posterior cerebral artery          | Cerebrovascular disease |
| G677300 | occlusion and stenosis of cerebellar arteries                | Cerebrovascular disease |
| G67y.00 | other cerebrovascular disease os                             | Cerebrovascular disease |

|         |                                                               |                         |
|---------|---------------------------------------------------------------|-------------------------|
| G67z.00 | other cerebrovascular disease nos                             | Cerebrovascular disease |
| G68..00 | late effects of cerebrovascular disease                       | Cerebrovascular disease |
| G680.00 | sequelae of subarachnoid haemorrhage                          | Cerebrovascular disease |
| G681.00 | sequelae of intracerebral haemorrhage                         | Cerebrovascular disease |
| G683.00 | sequelae of cerebral infarction                               | Cerebrovascular disease |
| G6y..00 | other specified cerebrovascular disease                       | Cerebrovascular disease |
| G6z..00 | cerebrovascular disease nos                                   | Cerebrovascular disease |
| Gyu6000 | [x]subarachnoid haemorrhage from other intracranial arteries  | Cerebrovascular disease |
| Gyu6100 | [x]other subarachnoid haemorrhage                             | Cerebrovascular disease |
| Gyu6200 | [x]other intracerebral haemorrhage                            | Cerebrovascular disease |
| Gyu6400 | [x]other cerebral infarction                                  | Cerebrovascular disease |
| Gyu6500 | [x]occlusion and stenosis of other precerebral arteries       | Cerebrovascular disease |
| Gyu6600 | [x]occlusion and stenosis of other cerebral arteries          | Cerebrovascular disease |
| Gyu6700 | [x]other specified cerebrovascular diseases                   | Cerebrovascular disease |
| Gyu6F00 | [x]intracerebral haemorrhage in hemisphere, unspecified       | Cerebrovascular disease |
| L440000 | puerperal cerebrovascular disorder unspecified                | Cerebrovascular disease |
| L440100 | puerperal cerebrovascular disorder - delivered                | Cerebrovascular disease |
| P7y0.00 | cerebrovascular system anomalies                              | Cerebrovascular disease |
| P7y0y00 | other specified cerebrovascular anomaly                       | Cerebrovascular disease |
| P7y0z00 | cerebrovascular system anomaly nos                            | Cerebrovascular disease |
| 1JA1.00 | suspected cerebrovascular disease                             | Cerebrovascular disease |
| S621.00 | open traumatic subarachnoid haemorrhage                       | Cerebrovascular disease |
| S628.00 | traumatic subdural haemorrhage                                | Cerebrovascular disease |
| S63z.00 | other cerebral haemorrhage following injury nos               | Cerebrovascular disease |
| F124.00 | vascular parkinsonism                                         | Cerebrovascular disease |
| G63..11 | infarction - precerebral                                      | Cerebrovascular disease |
| G64z.11 | brainstem infarction nos                                      | Cerebrovascular disease |
| G665.00 | pure motor lacunar syndrome                                   | Cerebrovascular disease |
| G666.00 | pure sensory lacunar syndrome                                 | Cerebrovascular disease |
| G619.00 | lobar cerebral haemorrhage                                    | Cerebrovascular disease |
| G657.00 | carotid territory transient ischaemic attack                  | Cerebrovascular disease |
| Q200011 | intracerebral haemorrhage in fetus or newborn                 | Cerebrovascular disease |
| Gyu6G00 | [x]cereb infarct due unsp occlus/stenos precerebr arteries    | Cerebrovascular disease |
| Gyu6300 | [x]cerebrl infarctn due/unspcf occlusn or sten/cerebrl artrts | Cerebrovascular disease |
| Gyu6.00 | [x]cerebrovascular diseases                                   | Cerebrovascular disease |
| 7P24200 | delivery of rehabilitation for stroke                         | Cerebrovascular disease |
| S62..12 | subarachnoid haemorrhage following injury                     | Cerebrovascular disease |
| S627.00 | traumatic subarachnoid haemorrhage                            | Cerebrovascular disease |
| G63..00 | precerebral arterial occlusion                                | Cerebrovascular disease |
| G631.00 | carotid artery occlusion                                      | Cerebrovascular disease |
| G64z.00 | cerebral infarction nos                                       | Cerebrovascular disease |
| G65..12 | transient ischaemic attack                                    | Cerebrovascular disease |
| G65..00 | transient cerebral ischaemia                                  | Cerebrovascular disease |
| S620.00 | closed traumatic subarachnoid haemorrhage                     | Cerebrovascular disease |
| G66..00 | stroke and cerebrovascular accident unspecified               | Cerebrovascular disease |
| Gyu6A00 | [x]other cerebrovascular disorders in diseases ce             | Cerebrovascular disease |

|         |                                                              |                         |
|---------|--------------------------------------------------------------|-------------------------|
| L440.12 | stroke in the puerperium                                     | Cerebrovascular disease |
| 1M4..00 | central post-stroke pain                                     | Cerebrovascular disease |
| Fyu5700 | [x]other vascular syndroms/brain in cerebrovasculr diseases  | Cerebrovascular disease |
| Gyu6D00 | [x]sequelae/other + unspecified cerebrovascular diseases     | Cerebrovascular disease |
| Gyu6E00 | [x]subarachnoid haemorrh from intracranial artery, unspecif  | Cerebrovascular disease |
| 8Hd6.00 | admission to stroke unit                                     | Cerebrovascular disease |
| G64z200 | left sided cerebral infarction                               | Cerebrovascular disease |
| G64z300 | right sided cerebral infarction                              | Cerebrovascular disease |
| 1477.00 | h/o: cerebrovascular disease                                 | Cerebrovascular disease |
| 14AK.00 | h/o: stroke in last year                                     | Cerebrovascular disease |
| F117.00 | infantile posthaemorrhagic hydrocephalus                     | Cerebrovascular disease |
| G60..00 | subarachnoid haemorrhage                                     | Cerebrovascular disease |
| G615.00 | bulbar haemorrhage                                           | Cerebrovascular disease |
| G610.00 | cortical haemorrhage                                         | Cerebrovascular disease |
| G611.00 | internal capsule haemorrhage                                 | Cerebrovascular disease |
| G650.11 | insufficiency - basilar artery                               | Cerebrovascular disease |
| G613.00 | cerebellar haemorrhage                                       | Cerebrovascular disease |
| G614.00 | pontine haemorrhage                                          | Cerebrovascular disease |
| G612.00 | basal nucleus haemorrhage                                    | Cerebrovascular disease |
| G663.00 | brain stem stroke syndrome                                   | Cerebrovascular disease |
| G64z000 | brainstem infarction                                         | Cerebrovascular disease |
| G676000 | cereb infarct due cerebral venous thrombosis, nonpyogenic    | Cerebrovascular disease |
| G6W..00 | cereb infarct due unsp occlus/stenos precerebr arteries      | Cerebrovascular disease |
| G641.11 | cerebral embolus                                             | Cerebrovascular disease |
| G6X..00 | cerebri infarctn due/unspcf occlusn or sten/cerebri artrsr   | Cerebrovascular disease |
| L440.00 | cerebrovascular disorders in the puerperium                  | Cerebrovascular disease |
| G64z100 | wallenberg syndrome                                          | Cerebrovascular disease |
| G651.00 | vertebral artery syndrome                                    | Cerebrovascular disease |
| G64..11 | cva - cerebral artery occlusion                              | Cerebrovascular disease |
| G61..11 | cva - cerebrovascular accid due to intracerebral haemorrhage | Cerebrovascular disease |
| L440.11 | cva - cerebrovascular accident in the puerperium             | Cerebrovascular disease |
| G66..13 | cva - cerebrovascular accident unspecified                   | Cerebrovascular disease |
| G66..11 | cva unspecified                                              | Cerebrovascular disease |
| 7A20300 | endarterectomy and patch repair of carotid artery            | Cerebrovascular disease |
| G651000 | vertebro-basilar artery syndrome                             | Cerebrovascular disease |
| G65..13 | vertebro-basilar insufficiency                               | Cerebrovascular disease |
| Q417000 | intracerebral (nontraumatic) haemorrhage of fet and newborn  | Cerebrovascular disease |
| G61..00 | intracerebral haemorrhage                                    | Cerebrovascular disease |
| G61X.00 | intracerebral haemorrhage in hemisphere, unspecified         | Cerebrovascular disease |
| G618.00 | intracerebral haemorrhage, multiple localized                | Cerebrovascular disease |
| G61X000 | left sided intracerebral haemorrhage, unspecified            | Cerebrovascular disease |
| G671.00 | generalised ischaemic cerebrovascular disease nos            | Cerebrovascular disease |
| 14A7.00 | h/o: cva/stroke                                              | Cerebrovascular disease |
| 4369B   | stroke                                                       | Cerebrovascular disease |
| G65z.00 | transient cerebral ischaemia nos                             | Cerebrovascular disease |
| 8HHM.00 | ref to multidisciplinary stroke function improvement service | Cerebrovascular disease |

|         |                                                              |                         |
|---------|--------------------------------------------------------------|-------------------------|
| 90m3.00 | stroke/transient ischaemic attack monitoring verbal invitati | Cerebrovascular disease |
| 4309    | subarachnoid haemorrhage                                     | Cerebrovascular disease |
| 4389    | cerebrovascular disease                                      | Cerebrovascular disease |
| 1477    | h/o: cerebrovascular disease                                 | Cerebrovascular disease |
| C391211 | thrombocytopenic eczema with immunodeficiency                | Coagulopathy            |
| D313200 | thrombocytopenic purpura with absent radius                  | Coagulopathy            |
| D306.12 | disseminated intravascular coagulation                       | Coagulopathy            |
| D306.00 | defibrination syndrome                                       | Coagulopathy            |
| BBs4.00 | [m]idiopathic thrombocythaemia                               | Coagulopathy            |
| D311000 | hereditary haemorrhagic thrombasthenia                       | Coagulopathy            |
| 42P2.00 | thrombocytopenia                                             | Coagulopathy            |
| D314.00 | secondary thrombocytopenia                                   | Coagulopathy            |
| 42Qr.00 | prothrombin consumption                                      | Coagulopathy            |
| G756100 | thrombotic thrombocytopenic purpura                          | Coagulopathy            |
| 88A8.11 | fibrinolysis                                                 | Coagulopathy            |
| 42P2.11 | auto-immune thrombocytopenia                                 | Coagulopathy            |
| D314300 | heparin-induced thrombocytopenia                             | Coagulopathy            |
| B937411 | primary thrombocythaemia                                     | Coagulopathy            |
| 9b93100 | haemophilia - specialty                                      | Coagulopathy            |
| D311.11 | bernard - soulier thrombopathy                               | Coagulopathy            |
| 42P8.00 | heparin induced thrombocytopenia screening test              | Coagulopathy            |
| 42QB.11 | plasma factor viii level                                     | Coagulopathy            |
| B937500 | idiopathic thrombocythaemia                                  | Coagulopathy            |
| 42P3.00 | thrombocythaemia                                             | Coagulopathy            |
| D303.00 | congenital deficiency of other clotting factors              | Coagulopathy            |
| D303z00 | congenital deficiency of other clotting factor nos           | Coagulopathy            |
| D305.00 | haemorrhagic disorder due to circulating anticoagulants      | Coagulopathy            |
| D305000 | haemorrhagic disorder due to antithrombinaemia               | Coagulopathy            |
| D305100 | haemorrhagic disorder due to hyperheparinaemia               | Coagulopathy            |
| D307000 | deficiency of coagulation factor due to liver disease        | Coagulopathy            |
| D307100 | deficiency of coagulation factor due to vitamin k deficiency | Coagulopathy            |
| D307200 | acquired factor ii deficiency                                | Coagulopathy            |
| D307211 | acquired prothrombin deficiency                              | Coagulopathy            |
| D307y00 | other specified acquired coagulation factor deficiency       | Coagulopathy            |
| D307z00 | acquired coagulation factor deficiency nos                   | Coagulopathy            |
| D31..00 | purpura and other haemorrhagic conditions                    | Coagulopathy            |
| D311z00 | qualitative platelet deficiency nos                          | Coagulopathy            |
| D313300 | [x]essential thrombocytopenia nos                            | Coagulopathy            |
| D313y00 | other specified primary thrombocytopenia                     | Coagulopathy            |
| D314100 | thrombocytopenia due to drugs                                | Coagulopathy            |
| D314200 | thrombocytopenia due to extracorporeal circulation of blood  | Coagulopathy            |
| D314y00 | other specified secondary thrombocytopenia                   | Coagulopathy            |
| D315.00 | thrombocytopenia nos                                         | Coagulopathy            |
| D31yz00 | other specified haemorrhagic condition nos                   | Coagulopathy            |
| D31z.00 | haemorrhagic condition nos                                   | Coagulopathy            |
| Dyu3000 | [x]other specified coagulation defects                       | Coagulopathy            |

|         |                                                            |              |
|---------|------------------------------------------------------------|--------------|
| Dyu3200 | [x]other primary thrombocytopenia                          | Coagulopathy |
| Dyu3300 | [x]other specified haemorrhagic conditions                 | Coagulopathy |
| Dyu3400 | [x]haemorrhagic condition, unspecified                     | Coagulopathy |
| L363z00 | postpartum coagulation defects nos                         | Coagulopathy |
| Q451z00 | transient neonatal thrombocytopenia nos                    | Coagulopathy |
| D313z11 | essential thrombocytopenia nos                             | Coagulopathy |
| D313111 | hereditary thrombocytopenia nec                            | Coagulopathy |
| Q451y11 | neonatal thrombocytopenia due to platelet alloimmunisation | Coagulopathy |
| L363.00 | postpartum coagulation defects                             | Coagulopathy |
| D311.00 | qualitative platelet defects                               | Coagulopathy |
| D313.00 | primary thrombocytopenia                                   | Coagulopathy |
| D313100 | congenital thrombocytopenic purpura                        | Coagulopathy |
| D313z00 | primary thrombocytopenia nos                               | Coagulopathy |
| D314z00 | secondary thrombocytopenia nos                             | Coagulopathy |
| 42QB.00 | factor viii assay                                          | Coagulopathy |
| D307.00 | acquired coagulation factor deficiency                     | Coagulopathy |
| D313.15 | thrombocytopenic purpura                                   | Coagulopathy |
| D307212 | acquired hypoprothrombinaemia                              | Coagulopathy |
| 42QI.00 | factor viii von willebrands factor ratio                   | Coagulopathy |
| D306.11 | afibrinogenaemia - acquired                                | Coagulopathy |
| D304.00 | von willebrand's disease                                   | Coagulopathy |
| D303611 | fibrin stabilising factor deficiency                       | Coagulopathy |
| D300.12 | haemophilia a                                              | Coagulopathy |
| D303000 | congenital afibrinogenaemia                                | Coagulopathy |
| D300.11 | antihemophilic globulin deficiency                         | Coagulopathy |
| N032000 | arthropathy due to haemophilia                             | Coagulopathy |
| D301.12 | haemophilia b                                              | Coagulopathy |
| D302.11 | haemophilia c                                              | Coagulopathy |
| D313000 | idiopathic thrombocytopenic purpura                        | Coagulopathy |
| D313011 | idiopathic purpura                                         | Coagulopathy |
| D30..00 | coagulation defects                                        | Coagulopathy |
| D303y00 | congenital deficiency of other clotting factor os          | Coagulopathy |
| D303100 | deficiency of factor ii or prothrombin                     | Coagulopathy |
| D303200 | deficiency of factor v or labile factor                    | Coagulopathy |
| D303300 | deficiency of factor vii or stable factor                  | Coagulopathy |
| D303400 | deficiency of factor x or stuart-prower factor             | Coagulopathy |
| D303500 | deficiency of factor xii or hageman factor                 | Coagulopathy |
| D303600 | deficiency of factor xiii or fibrin stabilizing factor     | Coagulopathy |
| B937400 | essential (haemorrhagic) thrombocythaemia                  | Coagulopathy |
| D313.11 | evan's syndrome                                            | Coagulopathy |
| 42Qj.00 | factor viii inhibitor activity                             | Coagulopathy |
| D301.11 | christmas disease                                          | Coagulopathy |
| D313012 | itp - idiopathic thrombocytopenic purpura                  | Coagulopathy |
| B937.12 | idiopathic thrombocythaemia                                | Coagulopathy |
| D313.12 | idiopathic thrombocytopenic purpura                        | Coagulopathy |
| D303111 | hypoprothrombinaemia                                       | Coagulopathy |

|         |                                                              |                          |
|---------|--------------------------------------------------------------|--------------------------|
| D300.00 | haemophilia-a (factor viii deficiency)                       | Coagulopathy             |
| D301.00 | haemophilia-b (factor ix deficiency)                         | Coagulopathy             |
| D302.00 | haemophilia-c (factor xi deficiency)                         | Coagulopathy             |
| D302.12 | rosenthal's disease                                          | Coagulopathy             |
| C290.00 | vitamin k deficiency                                         | Coagulopathy             |
| G58..00 | heart failure                                                | Congestive heart failure |
| G58z.11 | weak heart                                                   | Congestive heart failure |
| G58..11 | cardiac failure                                              | Congestive heart failure |
| G581.00 | left ventricular failure                                     | Congestive heart failure |
| G580100 | chronic congestive heart failure                             | Congestive heart failure |
| 8HBE.00 | heart failure follow-up                                      | Congestive heart failure |
| 662W.00 | heart failure annual review                                  | Congestive heart failure |
| 1O1..00 | heart failure confirmed                                      | Congestive heart failure |
| G5yyA00 | left ventricular diastolic dysfunction                       | Congestive heart failure |
| G581.12 | pulmonary oedema - acute                                     | Congestive heart failure |
| G581.11 | asthma - cardiac                                             | Congestive heart failure |
| 9hH0.00 | excepted heart failure quality indicators: patient unsuitabl | Congestive heart failure |
| 9hH1.00 | excepted heart failure quality indicators: informed dissent  | Congestive heart failure |
| G583.00 | heart failure with normal ejection fraction                  | Congestive heart failure |
| G583.11 | hfnef - heart failure with normal ejection fraction          | Congestive heart failure |
| 8IE0.00 | referral to heart failure education group declined           | Congestive heart failure |
| 8HgD.00 | discharge from heart failure nurse service                   | Congestive heart failure |
| 8IE1.00 | referral to heart failure exercise programme declined        | Congestive heart failure |
| 8CMK.00 | has heart failure management plan                            | Congestive heart failure |
| G554000 | congestive cardiomyopathy                                    | Congestive heart failure |
| 8CeC.00 | preferred place of care for next exacerbation heart failure  | Congestive heart failure |
| G584.00 | right ventricular failure                                    | Congestive heart failure |
| G580000 | acute congestive heart failure                               | Congestive heart failure |
| G580.12 | right heart failure                                          | Congestive heart failure |
| 661M500 | heart failure self-management plan agreed                    | Congestive heart failure |
| 679W100 | education about deteriorating heart failure                  | Congestive heart failure |
| 585f.00 | echocardiogram shows left ventricular systolic dysfunction   | Congestive heart failure |
| 585g.00 | echocardiogram shows left ventricular diastolic dysfunction  | Congestive heart failure |
| 662T.00 | congestive heart failure monitoring                          | Congestive heart failure |
| G5yy900 | left ventricular systolic dysfunction                        | Congestive heart failure |
| 8HTL.00 | referral to heart failure clinic                             | Congestive heart failure |
| 8CMW800 | heart failure clinical pathway                               | Congestive heart failure |
| G583.12 | heart failure with preserved ejection fraction               | Congestive heart failure |
| G58z.12 | cardiac failure nos                                          | Congestive heart failure |
| 8HTL000 | referral to rapid access heart failure clinic                | Congestive heart failure |
| 14A6.00 | h/o: heart failure                                           | Congestive heart failure |
| 585k.00 | echocardiogram shows normal left ventricular function        | Congestive heart failure |
| 9N2p.00 | seen by community heart failure nurse                        | Congestive heart failure |
| G5yyB00 | right ventricular diastolic dysfunction                      | Congestive heart failure |
| 8H2S.00 | admit heart failure emergency                                | Congestive heart failure |
| 9N0k.00 | seen in heart failure clinic                                 | Congestive heart failure |

|         |                                                       |                          |
|---------|-------------------------------------------------------|--------------------------|
| 8HHb.00 | referral to heart failure nurse                       | Congestive heart failure |
| 662f.00 | new york heart association classification - class i   | Congestive heart failure |
| 662g.00 | new york heart association classification - class ii  | Congestive heart failure |
| 662h.00 | new york heart association classification - class iii | Congestive heart failure |
| 662i.00 | new york heart association classification - class iv  | Congestive heart failure |
| 679X.00 | heart failure education                               | Congestive heart failure |
| G580400 | congestive heart failure due to valvular disease      | Congestive heart failure |
| G580200 | decompensated cardiac failure                         | Congestive heart failure |
| G580300 | compensated cardiac failure                           | Congestive heart failure |
| G581000 | acute left ventricular failure                        | Congestive heart failure |
| G5y4z00 | post cardiac operation heart failure nos              | Congestive heart failure |
| 9N6T.00 | referred by heart failure nurse specialist            | Congestive heart failure |
| 8Hg8.00 | discharge from practice nurse heart failure clinic    | Congestive heart failure |
| 9N4s.00 | did not attend practice nurse heart failure clinic    | Congestive heart failure |
| 67D4.00 | heart failure information given to patient            | Congestive heart failure |
| 8HHz.00 | referral to heart failure exercise programme          | Congestive heart failure |
| 9Or..00 | heart failure monitoring administration               | Congestive heart failure |
| 9Or0.00 | heart failure review completed                        | Congestive heart failure |
| 8CL3.00 | heart failure care plan discussed with patient        | Congestive heart failure |
| 8Hk0.00 | referred to heart failure education group             | Congestive heart failure |
| Q48y100 | congenital cardiac failure                            | Congestive heart failure |
| R2y1000 | [d]cardiorespiratory failure                          | Congestive heart failure |
| SP11200 | cardiorespiratory failure as a complication of care   | Congestive heart failure |
| SP11111 | heart failure as a complication of care               | Congestive heart failure |
| G58z.00 | heart failure nos                                     | Congestive heart failure |
| J615700 | cardiac portal cirrhosis                              | Congestive heart failure |
| SP11100 | cardiac insufficiency as a complication of care       | Congestive heart failure |
| 662p.00 | heart failure 6 month review                          | Congestive heart failure |
| 9Or1.00 | heart failure monitoring telephone invite             | Congestive heart failure |
| 9Or2.00 | heart failure monitoring verbal invite                | Congestive heart failure |
| 9Or3.00 | heart failure monitoring first letter                 | Congestive heart failure |
| 9Or4.00 | heart failure monitoring second letter                | Congestive heart failure |
| 9Or5.00 | heart failure monitoring third letter                 | Congestive heart failure |
| 9hH..00 | exception reporting: heart failure quality indicators | Congestive heart failure |
| G581.13 | impaired left ventricular function                    | Congestive heart failure |
| Q490.00 | neonatal cardiac failure                              | Congestive heart failure |
| 8B29.00 | cardiac failure therapy                               | Congestive heart failure |
| 14AM.00 | h/o: heart failure in last year                       | Congestive heart failure |
| G580.13 | right ventricular failure                             | Congestive heart failure |
| G580.11 | congestive cardiac failure                            | Congestive heart failure |
| G211100 | benign hypertensive heart disease with ccf            | Congestive heart failure |
| G580.14 | biventricular failure                                 | Congestive heart failure |
| G5yyC00 | diastolic dysfunction                                 | Congestive heart failure |
| G580.00 | congestive heart failure                              | Congestive heart failure |
| G210100 | malignant hypertensive heart disease with ccf         | Congestive heart failure |
| G1yz100 | rheumatic left ventricular failure                    | Congestive heart failure |

|         |                                                              |                          |
|---------|--------------------------------------------------------------|--------------------------|
| 9m5..00 | high risk of heart failure screening invitation              | Congestive heart failure |
| G21z100 | hypertensive heart disease nos with ccf                      | Congestive heart failure |
| G232.00 | hypertensive heart&renal dis with (congestive) heart failure | Congestive heart failure |
| G234.00 | hyperten heart&renal dis+both(congestv)heart and renal fail  | Congestive heart failure |
| 388D.00 | new york heart assoc classification heart failure symptoms   | Congestive heart failure |
| G582.00 | acute heart failure                                          | Congestive heart failure |
| 7824BW  | weak heart                                                   | Congestive heart failure |
| 7824FH  | heart failure                                                | Congestive heart failure |
| ZRad.00 | new york heart assoc classification heart failure symptoms   | Congestive heart failure |
| 4270C   | congestive cardiac failure                                   | Congestive heart failure |
| 4270    | congestive heart failure                                     | Congestive heart failure |
| 425 CC  | congestive cardiomyopathy                                    | Congestive heart failure |
| H31..00 | chronic bronchitis                                           | COPD                     |
| H322.00 | centrilobular emphysema                                      | COPD                     |
| 38Dd.00 | clinical chronic obstructive pulmonary disease questionnaire | COPD                     |
| 38Dg.00 | chronic obstructive pulmonary disease assessment test        | COPD                     |
| H3y..11 | other specified chronic obstructive pulmonary disease        | COPD                     |
| H3z..11 | chronic obstructive pulmonary disease nos                    | COPD                     |
| H32y200 | macleod's unilateral emphysema                               | COPD                     |
| H311.00 | mucopurulent chronic bronchitis                              | COPD                     |
| 9h5..00 | exception reporting: copd quality indicators                 | COPD                     |
| 9h51.00 | excepted from copd quality indicators: patient unsuitable    | COPD                     |
| 9h52.00 | excepted from copd quality indicators: informed dissent      | COPD                     |
| H311100 | fetid chronic bronchitis                                     | COPD                     |
| 66YB.00 | chronic obstructive pulmonary disease monitoring             | COPD                     |
| 66YD.00 | chronic obstructive pulmonary disease monitoring due         | COPD                     |
| 66YL.00 | chronic obstructive pulmonary disease follow-up              | COPD                     |
| 66YM.00 | chronic obstructive pulmonary disease annual review          | COPD                     |
| 8CE6.00 | chronic obstructive pulmonary disease leaflet given          | COPD                     |
| 8BMW.00 | issue of chronic obstructive pulmonary disease rescue pack   | COPD                     |
| 66YB000 | chronic obstructive pulmonary disease 3 monthly review       | COPD                     |
| 66YB100 | chronic obstructive pulmonary disease 6 monthly review       | COPD                     |
| 9kf..00 | copd - enhanced services administration                      | COPD                     |
| 9kf0.00 | copd patient unsuitable for pulmonary rehab - enh serv admin | COPD                     |
| 9kf0.11 | copd patient unsuitable for pulmonary rehabilitation         | COPD                     |
| 9kf1.11 | referred for copd structured smoking assessment              | COPD                     |
| 9kf1.00 | refer copd structured smoking assessment - enhanc serv admin | COPD                     |
| 9kf2.00 | copd structured smoking assessment declined - enh serv admin | COPD                     |
| 9kf2.11 | copd structured smoking assessment declined                  | COPD                     |
| 14B3.12 | history of chronic obstructive pulmonary disease             | COPD                     |
| 66YS.00 | chronic obstructive pulmonary disease monitoring by nurse    | COPD                     |
| 66YT.00 | chronic obstructive pulmonary disease monitoring by doctor   | COPD                     |
| 8BMa000 | chronic obstructiv pulmonary disease medication optimisation | COPD                     |
| 8CeD.00 | preferred place of care for next exacerbation of copd        | COPD                     |
| 8Hkw.00 | referral to copd community nursing team                      | COPD                     |
| 9e03.00 | gp ooh service notified of copd care plan                    | COPD                     |



|         |                                                              |      |
|---------|--------------------------------------------------------------|------|
| 661M300 | copd self-management plan agreed                             | COPD |
| 661N300 | copd self-management plan review                             | COPD |
| 9NgP.00 | on chronic obstructive pulmonary disease supprtv cre pathway | COPD |
| 9NgP.11 | on copd (chr obstruc pulmonary disease) supportv cre pathway | COPD |
| H30..12 | recurrent wheezy bronchitis                                  | COPD |
| 8IEy.00 | chronic obstructive pulmon dis wr self managem plan declined | COPD |
| 9Oi0.00 | chronic obstructive pulmonary disease monitoring 1st letter  | COPD |
| H581.00 | interstitial emphysema                                       | COPD |
| 9Oi1.00 | chronic obstructive pulmonary disease monitoring 2nd letter  | COPD |
| 9Oi2.00 | chronic obstructive pulmonary disease monitoring 3rd letter  | COPD |
| 8CMV.00 | has chronic obstructive pulmonary disease care plan          | COPD |
| 8H2R.00 | admit copd emergency                                         | COPD |
| H3A..00 | end stage chronic obstructive airways disease                | COPD |
| 8CMW500 | chronic obstructive pulmonary disease care pathway           | COPD |
| 9Nk7000 | seen in chronic obstructive pulmonary disease clinic         | COPD |
| 8IEZ.00 | chronic obstructive pulmonary disease rescue pack declined   | COPD |
| H320200 | giant bullous emphysema                                      | COPD |
| H312100 | emphysematous bronchitis                                     | COPD |
| H312.00 | obstructive chronic bronchitis                               | COPD |
| 66Yg.00 | chronic obstructive pulmonary disease disturbs sleep         | COPD |
| 66Yh.00 | chronic obstructive pulmonary disease does not disturb sleep | COPD |
| H310z00 | simple chronic bronchitis nos                                | COPD |
| H311z00 | mucopurulent chronic bronchitis nos                          | COPD |
| H312011 | chronic wheezy bronchitis                                    | COPD |
| H312200 | acute exacerbation of chronic obstructive airways disease    | COPD |
| H312z00 | obstructive chronic bronchitis nos                           | COPD |
| H313.00 | mixed simple and mucopurulent chronic bronchitis             | COPD |
| H31y.00 | other chronic bronchitis                                     | COPD |
| H31yz00 | other chronic bronchitis nos                                 | COPD |
| H31z.00 | chronic bronchitis nos                                       | COPD |
| H320.00 | chronic bullous emphysema                                    | COPD |
| H320000 | segmental bullous emphysema                                  | COPD |
| H320100 | zonal bullous emphysema                                      | COPD |
| H320z00 | chronic bullous emphysema nos                                | COPD |
| H32y.00 | other emphysema                                              | COPD |
| H32y000 | acute vesicular emphysema                                    | COPD |
| H32z.00 | emphysema nos                                                | COPD |
| H3y..00 | other specified chronic obstructive airways disease          | COPD |
| H3z..00 | chronic obstructive airways disease nos                      | COPD |
| H464000 | chronic emphysema due to chemical fumes                      | COPD |
| Hyu3000 | [x]other emphysema                                           | COPD |
| Hyu3100 | [x]other specified chronic obstructive pulmonary disease     | COPD |
| H320300 | bullous emphysema with collapse                              | COPD |
| H32y100 | atrophic (senile) emphysema                                  | COPD |
| H32yz00 | other emphysema nos                                          | COPD |
| 679V.00 | health education - chronic obstructive pulmonary disease     | COPD |

|         |                                                                   |                    |
|---------|-------------------------------------------------------------------|--------------------|
| H36..00 | mild chronic obstructive pulmonary disease                        | COPD               |
| H37..00 | moderate chronic obstructive pulmonary disease                    | COPD               |
| H38..00 | severe chronic obstructive pulmonary disease                      | COPD               |
| H32y111 | acute interstitial emphysema                                      | COPD               |
| H3...00 | chronic obstructive pulmonary disease                             | COPD               |
| H311000 | purulent chronic bronchitis                                       | COPD               |
| H310.00 | simple chronic bronchitis                                         | COPD               |
| H310000 | chronic catarrhal bronchitis                                      | COPD               |
| H39..00 | very severe chronic obstructive pulmonary disease                 | COPD               |
| H3y1.00 | chron obstruct pulmonary dis wth acute exacerbation, unspec       | COPD               |
| H3y0.00 | chronic obstruct pulmonary dis with acute lower resp infectn      | COPD               |
| H3...11 | chronic obstructive airways disease                               | COPD               |
| H582.00 | compensatory emphysema                                            | COPD               |
| H32..00 | emphysema                                                         | COPD               |
| SK07.00 | subcutaneous emphysema                                            | COPD               |
| 66YI.00 | copd self-management plan given                                   | COPD               |
| 66YL.11 | copd follow-up                                                    | COPD               |
| H31y100 | chronic tracheobronchitis                                         | COPD               |
| H321.00 | panlobular emphysema                                              | COPD               |
| 8CR1.00 | chronic obstructive pulmonary disease clini management plan       | COPD               |
| 90i..00 | chronic obstructive pulmonary disease monitoring admin            | COPD               |
| 90i3.00 | chronic obstructive pulmonary disease monitoring verb invite      | COPD               |
| 90i4.00 | chronic obstructive pulmonary disease monitor phone invite        | COPD               |
| 66Yd.00 | copd accident and emergency attendance since last visit           | COPD               |
| 66Ye.00 | emergency copd admission since last appointment                   | COPD               |
| 66Yf.00 | number of copd exacerbations in past year                         | COPD               |
| 66Yi.00 | multiple copd emergency hospital admissions                       | COPD               |
| H3y1.00 | \chron obstruct pulmonary dis wth acute exacerbation, unspec\'''' | COPD               |
| D00y012 | plummer-vinson syndrome                                           | Deficiency anaemia |
| D00y000 | sideropenic dysphagia                                             | Deficiency anaemia |
| D00y.12 | plummer - vinson syndrome                                         | Deficiency anaemia |
| D010.11 | addison's anaemia                                                 | Deficiency anaemia |
| D011011 | imerslund - grasbeck syndrome                                     | Deficiency anaemia |
| 1452.00 | h/o: anaemia vit.b12 deficient                                    | Deficiency anaemia |
| 66E6.00 | reticulcytosis after b12                                          | Deficiency anaemia |
| D001.00 | iron deficiency anaemia due to dietary causes                     | Deficiency anaemia |
| D00yz00 | other specified iron deficiency anaemia nos                       | Deficiency anaemia |
| D00z.00 | unspecified iron deficiency anaemia                               | Deficiency anaemia |
| D00z100 | chlorotic anaemia                                                 | Deficiency anaemia |
| D00z200 | idiopathic hypochromic anaemia                                    | Deficiency anaemia |
| D00zz00 | iron deficiency anaemia nos                                       | Deficiency anaemia |
| D011z00 | other vitamin b12 deficiency anaemia nos                          | Deficiency anaemia |
| D013.00 | other specified megaloblastic anaemia nec                         | Deficiency anaemia |
| D013000 | combined b12 and folate deficiency anaemia                        | Deficiency anaemia |
| D013z00 | other specified megaloblastic anaemia nec nos                     | Deficiency anaemia |
| D014.00 | protein-deficiency anaemia                                        | Deficiency anaemia |

|         |                                                              |                    |
|---------|--------------------------------------------------------------|--------------------|
| D014z00 | protein-deficiency anaemia nos                               | Deficiency anaemia |
| D01y000 | vitamin c deficiency anaemia                                 | Deficiency anaemia |
| D01y100 | vitamin e deficiency anaemia                                 | Deficiency anaemia |
| D01yz00 | other specified nutritional deficiency anaemia nos           | Deficiency anaemia |
| D01z000 | [x]megaloblastic anaemia nos                                 | Deficiency anaemia |
| D0y..00 | other specified deficiency anaemias                          | Deficiency anaemia |
| D0z..00 | deficiency anaemias nos                                      | Deficiency anaemia |
| Dyu0000 | [x]other iron deficiency anaemias                            | Deficiency anaemia |
| Dyu0100 | [x]other dietary vitamin b12 deficiency anaemia              | Deficiency anaemia |
| Dyu0200 | [x]other vitamin b12 deficiency anaemias                     | Deficiency anaemia |
| Dyu0300 | [x]other folate deficiency anaemias                          | Deficiency anaemia |
| Dyu0600 | [x]vitamin b12 deficiency anaemia, unspecified               | Deficiency anaemia |
| F381500 | myasthenic syndrome due to pernicious anaemia                | Deficiency anaemia |
| L182500 | iron deficiency anaemia of pregnancy                         | Deficiency anaemia |
| D01z.11 | megaloblastic anaemia nos                                    | Deficiency anaemia |
| D012112 | megaloblastic anaemia due to dietary causes                  | Deficiency anaemia |
| D011013 | vegan's anaemia                                              | Deficiency anaemia |
| D010.12 | biermer's congenital pernicious anaemia                      | Deficiency anaemia |
| D0...00 | deficiency anaemias                                          | Deficiency anaemia |
| D00y.00 | other specified iron deficiency anaemia                      | Deficiency anaemia |
| D01..00 | other deficiency anaemias                                    | Deficiency anaemia |
| D011.00 | other vitamin b12 deficiency anaemias                        | Deficiency anaemia |
| D011000 | vitamin b12 deficiency anaemia due to dietary causes         | Deficiency anaemia |
| D01z.00 | other deficiency anaemias nos                                | Deficiency anaemia |
| U604100 | [x]vit b12/folic/oth ant-megalobl-anaem caus adv ef ther use | Deficiency anaemia |
| D014000 | amino-acid deficiency anaemia                                | Deficiency anaemia |
| D01..11 | megaloblastic anaemia                                        | Deficiency anaemia |
| D00z000 | achlorhydric anaemia                                         | Deficiency anaemia |
| D010.00 | pernicious anaemia                                           | Deficiency anaemia |
| D012.11 | folic acid deficiency anaemia                                | Deficiency anaemia |
| D0...12 | sideropenic anaemia                                          | Deficiency anaemia |
| C294300 | iron deficiency                                              | Deficiency anaemia |
| D011100 | vit b12 defic anaemia due to malabsorption with proteinuria  | Deficiency anaemia |
| D011.11 | vitamin b12 deficiency anaemia                               | Deficiency anaemia |
| D011X00 | vitamin b12 deficiency anaemia, unspecified                  | Deficiency anaemia |
| D00..12 | microcytic - hypochromic anaemia                             | Deficiency anaemia |
| D00..00 | iron deficiency anaemias                                     | Deficiency anaemia |
| D012.00 | folate-deficiency anaemia                                    | Deficiency anaemia |
| D012100 | folate-deficiency anaemia due to dietary causes              | Deficiency anaemia |
| D012400 | folate-deficiency anaemia due to liver disorders             | Deficiency anaemia |
| D012300 | folate-deficiency anaemia due to malabsorption               | Deficiency anaemia |
| D012z00 | folate-deficiency anaemia nos                                | Deficiency anaemia |
| D012200 | folate-deficiency anaemia, drug induced                      | Deficiency anaemia |
| D012111 | goat's milk anaemia                                          | Deficiency anaemia |
| 8HgC.00 | discharged from diabetes shared care programme               | Diabetes           |
| 42W..00 | test request : haemoglobin a1c                               | Diabetes           |

|         |                                                              |          |
|---------|--------------------------------------------------------------|----------|
| 66AQ000 | unsuitable for diabetes year of care programme               | Diabetes |
| 66AQ100 | declined consent for diabetes year of care programme         | Diabetes |
| 679L000 | education in self management of diabetes                     | Diabetes |
| 66As.00 | diabetic on subcutaneous treatment                           | Diabetes |
| C10..00 | diabetes mellitus                                            | Diabetes |
| C10FJ11 | insulin treated type ii diabetes mellitus                    | Diabetes |
| C109J11 | insulin treated non-insulin dependent diabetes mellitus      | Diabetes |
| ZV65312 | [v]dietary counselling in diabetes mellitus                  | Diabetes |
| F171100 | autonomic neuropathy due to diabetes                         | Diabetes |
| C10G.00 | secondary pancreatic diabetes mellitus                       | Diabetes |
| C11y000 | steroid induced diabetes                                     | Diabetes |
| C10B000 | steroid induced diabetes mellitus without complication       | Diabetes |
| C108y00 | other specified diabetes mellitus with multiple comps        | Diabetes |
| C106y00 | other specified diabetes mellitus with neurological comps    | Diabetes |
| C105y00 | other specified diabetes mellitus with ophthalmic complicatn | Diabetes |
| C10yy00 | other specified diabetes mellitus with other spec comps      | Diabetes |
| C10zy00 | other specified diabetes mellitus with unspecified comps     | Diabetes |
| 9h4..00 | exception reporting: diabetes quality indicators             | Diabetes |
| 9h42.00 | excepted from diabetes quality indicators: informed dissent  | Diabetes |
| F420600 | non proliferative diabetic retinopathy                       | Diabetes |
| 9N2d.00 | seen by diabetologist                                        | Diabetes |
| 2BBJ.00 | o/e - no right diabetic retinopathy                          | Diabetes |
| 2BBK.00 | o/e - no left diabetic retinopathy                           | Diabetes |
| 2BBL.00 | o/e - diabetic maculopathy present both eyes                 | Diabetes |
| 2BBM.00 | o/e - diabetic maculopathy absent both eyes                  | Diabetes |
| 8H7r.00 | refer to diabetic foot screener                              | Diabetes |
| 9N4I.00 | dna - did not attend diabetic clinic                         | Diabetes |
| 2G5E.00 | o/e - right diabetic foot at low risk                        | Diabetes |
| 2G5G.00 | o/e - right diabetic foot at high risk                       | Diabetes |
| 2G5H.00 | o/e - right diabetic foot - ulcerated                        | Diabetes |
| 2G5L.00 | o/e - left diabetic foot - ulcerated                         | Diabetes |
| 2G5I.00 | o/e - left diabetic foot at low risk                         | Diabetes |
| 2G5K.00 | o/e - left diabetic foot at high risk                        | Diabetes |
| 2G5J.00 | o/e - left diabetic foot at moderate risk                    | Diabetes |
| 2G5F.00 | o/e - right diabetic foot at moderate risk                   | Diabetes |
| 66AW.00 | diabetic foot risk assessment                                | Diabetes |
| 6761.00 | diabetic pre-pregnancy counselling                           | Diabetes |
| 8B3I.00 | diabetes medication review                                   | Diabetes |
| C10FK00 | hyperosmolar non-ketotic state in type 2 diabetes mellitus   | Diabetes |
| C10N.00 | secondary diabetes mellitus                                  | Diabetes |
| 9OLZ.00 | diabetes monitoring admin.nos                                | Diabetes |
| 8I83.00 | did not complete desmond diabetes structured educat program  | Diabetes |
| 8I84.00 | did not complete xpert diabetes structured education program | Diabetes |
| 9NiD.00 | did not attend desmond diabetes structured education program | Diabetes |
| 66At.00 | diabetic dietary review                                      | Diabetes |
| 66At000 | type i diabetic dietary review                               | Diabetes |

|         |                                                               |          |
|---------|---------------------------------------------------------------|----------|
| 66At100 | type ii diabetic dietary review                               | Diabetes |
| 8IAs.00 | diabetic dietary review declined                              | Diabetes |
| 66At111 | type 2 diabetic dietary review                                | Diabetes |
| 66At011 | type 1 diabetic dietary review                                | Diabetes |
| 2G5d.00 | o/e - left diabetic foot at increased risk                    | Diabetes |
| 2G5e.00 | o/e - right diabetic foot at increased risk                   | Diabetes |
| C10FK11 | hyperosmolar non-ketotic state in type ii diabetes mellitus   | Diabetes |
| C10EQ11 | type i diabetes mellitus with gastroparesis                   | Diabetes |
| 9NiZ.00 | did not attend diabetes foot screening                        | Diabetes |
| 2BBF.00 | retinal abnormality - diabetes related                        | Diabetes |
| 9m0..00 | diabetic retinopathy screening administrative status          | Diabetes |
| 9m02.00 | eligibility temporarily inactive for diabetic retinop screen  | Diabetes |
| 9m03.00 | eligibility permanently inactive for diabetic retinop screen  | Diabetes |
| 9m07.00 | excluded diabetic retinop screen as under care ophthalmolgist | Diabetes |
| 9m0C.00 | excluded frm diabetic retinopathy screen as terminal illness  | Diabetes |
| 9m0D.00 | excluded from diabetic retinopthy screen as learn disability  | Diabetes |
| 9m0E.00 | excluded from diabetic retinopathy screen physical disorder   | Diabetes |
| 66Au.00 | diabetic erectile dysfunction review                          | Diabetes |
| 66Av.00 | diabetic assessment of erectile dysfunction                   | Diabetes |
| 1IA..00 | no evidence of diabetic nephropathy                           | Diabetes |
| 9h43.00 | excepted from diabetes qual indicators: service unavailable   | Diabetes |
| 9OLN.00 | diabetes monitor invitation by sms (short message service)    | Diabetes |
| 8IE2.00 | diabetes care plan declined                                   | Diabetes |
| 67IJ100 | pre-conception advice for diabetes mellitus                   | Diabetes |
| 66Ac.00 | diabetic peripheral neuropathy screening                      | Diabetes |
| C10EL00 | type 1 diabetes mellitus with persistent microalbuminuria     | Diabetes |
| 66Ab.00 | diabetic foot examination                                     | Diabetes |
| F420700 | high risk proliferative diabetic retinopathy                  | Diabetes |
| F420000 | background diabetic retinopathy                               | Diabetes |
| C350011 | bronzed diabetes                                              | Diabetes |
| 8IEa.00 | referral to dafne diabetes structured educn prog declined     | Diabetes |
| 66o..00 | further diabetic monitoring                                   | Diabetes |
| C10N000 | secondary diabetes mellitus without complication              | Diabetes |
| 9M00.00 | informed consent for diabetes national audit                  | Diabetes |
| 9M10.00 | informed dissent for diabetes national audit                  | Diabetes |
| C10F.00 | type 2 diabetes mellitus                                      | Diabetes |
| C10E.00 | type 1 diabetes mellitus                                      | Diabetes |
| C10G000 | secondary pancreatic diabetes mellitus without complication   | Diabetes |
| 66AJ100 | brittle diabetes                                              | Diabetes |
| 8CA4100 | pt advised re diabetic diet                                   | Diabetes |
| C104.11 | diabetic nephropathy                                          | Diabetes |
| 661N400 | diabetes self-management plan review                          | Diabetes |
| 8Hlc.00 | referral to community diabetes service                        | Diabetes |
| 661M400 | diabetes self-management plan agreed                          | Diabetes |
| L180X00 | pre-existing diabetes mellitus, unspecified                   | Diabetes |
| F372.00 | polyneuropathy in diabetes                                    | Diabetes |

|         |                                                             |          |
|---------|-------------------------------------------------------------|----------|
| 67D8.00 | provision of diabetes clinical summary                      | Diabetes |
| 8BL2.00 | patient on maximal tolerated therapy for diabetes           | Diabetes |
| 9N1i.00 | seen in diabetic foot clinic                                | Diabetes |
| 918T.00 | diabetes key contact                                        | Diabetes |
| 8HBG.00 | diabetic retinopathy 12 month review                        | Diabetes |
| 8HBH.00 | diabetic retinopathy 6 month review                         | Diabetes |
| 9NN8.00 | under care of diabetologist                                 | Diabetes |
| 9NN9.00 | under care of diabetes specialist nurse                     | Diabetes |
| 9NND.00 | under care of diabetic foot screener                        | Diabetes |
| 816F.00 | diabetic retinopathy screening not indicated                | Diabetes |
| 816G.00 | diabetic foot examination not indicated                     | Diabetes |
| 9360.00 | patient held diabetic record issued                         | Diabetes |
| 2BBP.00 | o/e - right eye background diabetic retinopathy             | Diabetes |
| 2BBQ.00 | o/e - left eye background diabetic retinopathy              | Diabetes |
| 2BBR.00 | o/e - right eye preproliferative diabetic retinopathy       | Diabetes |
| 2BBS.00 | o/e - left eye preproliferative diabetic retinopathy        | Diabetes |
| 2BBT.00 | o/e - right eye proliferative diabetic retinopathy          | Diabetes |
| 2BBV.00 | o/e - left eye proliferative diabetic retinopathy           | Diabetes |
| 2BBW.00 | o/e - right eye diabetic maculopathy                        | Diabetes |
| 2BBX.00 | o/e - left eye diabetic maculopathy                         | Diabetes |
| 9b92000 | diabetic medicine                                           | Diabetes |
| C10H.00 | diabetes mellitus induced by non-steroid drugs              | Diabetes |
| 66AU.00 | diabetes care by hospital only                              | Diabetes |
| 68A7.00 | diabetic retinopathy screening                              | Diabetes |
| 9OL..00 | diabetes monitoring admin.                                  | Diabetes |
| 8IEQ.00 | referral to community diabetes specialist nurse declined    | Diabetes |
| 8HTE100 | referral to community diabetes clinic                       | Diabetes |
| 8CMW700 | diabetes clinical pathway                                   | Diabetes |
| 8OA3.00 | provision of written information about diabetes and driving | Diabetes |
| 90y0000 | diabetic foot screening invitation                          | Diabetes |
| 90y0200 | diabetic foot screening invitation first letter             | Diabetes |
| 90y0300 | diabetic foot screening invitation second letter            | Diabetes |
| 90y0400 | diabetic foot screening invitation third letter             | Diabetes |
| C100111 | maturity onset diabetes                                     | Diabetes |
| K27y700 | erectile dysfunction due to diabetes mellitus               | Diabetes |
| 9NJy.00 | in-house diabetic foot screening                            | Diabetes |
| 66AH200 | conversion to insulin by diabetes specialist nurse          | Diabetes |
| 679L200 | education about diabetes and driving                        | Diabetes |
| 679L211 | advice about diabetes and driving                           | Diabetes |
| 8194.00 | diabetes structured education programme not available       | Diabetes |
| 66AS000 | diabetes year of care annual review                         | Diabetes |
| C10P.00 | diabetes mellitus in remission                              | Diabetes |
| C10P000 | type i diabetes mellitus in remission                       | Diabetes |
| C10P011 | type 1 diabetes mellitus in remission                       | Diabetes |
| C10P100 | type ii diabetes mellitus in remission                      | Diabetes |
| 8I3W.00 | diabetic foot examination declined                          | Diabetes |

|         |                                                             |          |
|---------|-------------------------------------------------------------|----------|
| 8CR2.00 | diabetes clinical management plan                           | Diabetes |
| 813X.00 | diabetic retinopathy screening refused                      | Diabetes |
| 7276.00 | pan retinal photocoagulation for diabetes                   | Diabetes |
| C10C.12 | maturity onset diabetes in youth type 1                     | Diabetes |
| 13B1.00 | diabetic diet                                               | Diabetes |
| 13Y1.00 | diabetic association member                                 | Diabetes |
| 1434    | h/o: diabetes mellitus                                      | Diabetes |
| 90L..11 | diabetes clinic administration                              | Diabetes |
| 8CP2.00 | transition of diabetes care options discussed               | Diabetes |
| 2G5W.00 | o/e - left chronic diabetic foot ulcer                      | Diabetes |
| 2G5V.00 | o/e - right chronic diabetic foot ulcer                     | Diabetes |
| 90LB.00 | attended diabetes structured education programme            | Diabetes |
| 8HTe.00 | referral to diabetes preconception counselling clinic       | Diabetes |
| 66Af.00 | patient diabetes education review                           | Diabetes |
| 8Hj0.00 | referral to diabetes structured education programme         | Diabetes |
| 68A9.00 | diabetic retinopathy screening offered                      | Diabetes |
| 8CS0.00 | diabetes care plan agreed                                   | Diabetes |
| 8Hg4.00 | discharged from care of diabetes specialist nurse           | Diabetes |
| 8157.00 | patient held diabetic record declined                       | Diabetes |
| 9N0n.00 | seen in community diabetes specialist clinic                | Diabetes |
| 679R.00 | patient offered diabetes structured education programme     | Diabetes |
| 9N0o.00 | seen in community diabetic specialist nurse clinic          | Diabetes |
| 9N0m.00 | seen in diabetic nurse consultant clinic                    | Diabetes |
| 2BBo.00 | o/e - sight threatening diabetic retinopathy                | Diabetes |
| 9OLD.00 | diabetic patient unsuitable for digital retinal photography | Diabetes |
| 42WZ.00 | hb. a1c - diabetic control nos                              | Diabetes |
| 44V3.00 | glucose tol. test diabetic                                  | Diabetes |
| C101.00 | diabetes mellitus with ketoacidosis                         | Diabetes |
| 66A..00 | diabetic monitoring                                         | Diabetes |
| 66A1.00 | initial diabetic assessment                                 | Diabetes |
| 66A2.00 | follow-up diabetic assessment                               | Diabetes |
| 66A3.00 | diabetic on diet only                                       | Diabetes |
| 66A4.00 | diabetic on oral treatment                                  | Diabetes |
| 66A5.00 | diabetic on insulin                                         | Diabetes |
| 66A8.00 | has seen dietician - diabetes                               | Diabetes |
| 66A9.00 | understands diet - diabetes                                 | Diabetes |
| 66AD.00 | fundoscopy - diabetic check                                 | Diabetes |
| 66AG.00 | diabetic drug side effects                                  | Diabetes |
| 66AH.00 | diabetic treatment changed                                  | Diabetes |
| 66AI.00 | diabetic - good control                                     | Diabetes |
| 66AJz00 | diabetic - poor control nos                                 | Diabetes |
| 66AK.00 | diabetic - cooperative patient                              | Diabetes |
| 66AL.00 | diabetic-uncooperative patient                              | Diabetes |
| 66AM.00 | diabetic - follow-up default                                | Diabetes |
| 66AN.00 | date diabetic treatment start                               | Diabetes |
| 66AP.00 | diabetes: practice programme                                | Diabetes |

|         |                                                             |          |
|---------|-------------------------------------------------------------|----------|
| 66AQ.00 | diabetes: shared care programme                             | Diabetes |
| 66AR.00 | diabetes management plan given                              | Diabetes |
| 66AS.00 | diabetic annual review                                      | Diabetes |
| 66AT.00 | annual diabetic blood test                                  | Diabetes |
| 66AZ.00 | diabetic monitoring nos                                     | Diabetes |
| C10ER00 | latent autoimmune diabetes mellitus in adult                | Diabetes |
| 679L.00 | health education - diabetes                                 | Diabetes |
| C109D00 | non-insulin dependent diabetes mellitus with hypoglyca coma | Diabetes |
| C109A00 | non-insulin dependent diabetes mellitus with mononeuropathy | Diabetes |
| C109C00 | non-insulin dependent diabetes mellitus with nephropathy    | Diabetes |
| C109B00 | non-insulin dependent diabetes mellitus with polyneuropathy | Diabetes |
| C109400 | non-insulin dependent diabetes mellitus with ulcer          | Diabetes |
| C109F00 | non-insulin-dependent d m with peripheral angiopath         | Diabetes |
| C109.00 | non-insulin dependent diabetes mellitus                     | Diabetes |
| C109300 | non-insulin-dependent diabetes mellitus with multiple comps | Diabetes |
| C109200 | non-insulin-dependent diabetes mellitus with neuro comps    | Diabetes |
| C109E00 | non-insulin depend diabetes mellitus with diabetic cataract | Diabetes |
| C109700 | non-insulin dependent diabetes mellitus - poor control      | Diabetes |
| C109H00 | non-insulin dependent d m with neuropathic arthropathy      | Diabetes |
| C109500 | non-insulin dependent diabetes mellitus with gangrene       | Diabetes |
| 8A12.00 | diabetic crisis monitoring                                  | Diabetes |
| 8A13.00 | diabetic stabilisation                                      | Diabetes |
| 8CE0.00 | diabetic leaflet given                                      | Diabetes |
| 8H2J.00 | admit diabetic emergency                                    | Diabetes |
| 8H3O.00 | non-urgent diabetic admission                               | Diabetes |
| 8H7C.00 | refer, diabetic liaison nurse                               | Diabetes |
| 8HKE.00 | diabetology d.v. requested                                  | Diabetes |
| 8HLE.00 | diabetology d.v. done                                       | Diabetes |
| 8HME.00 | listed for diabetology admissn                              | Diabetes |
| 8HVU.00 | private referral to diabetologist                           | Diabetes |
| 9N1Q.00 | seen in diabetic clinic                                     | Diabetes |
| 9OL1.00 | attends diabetes monitoring                                 | Diabetes |
| 9OL2.00 | refuses diabetes monitoring                                 | Diabetes |
| 9OL3.00 | diabetes monitoring default                                 | Diabetes |
| C100.00 | diabetes mellitus with no mention of complication           | Diabetes |
| C100z00 | diabetes mellitus nos with no mention of complication       | Diabetes |
| C101y00 | other specified diabetes mellitus with ketoacidosis         | Diabetes |
| C101z00 | diabetes mellitus nos with ketoacidosis                     | Diabetes |
| C102.00 | diabetes mellitus with hyperosmolar coma                    | Diabetes |
| C102000 | diabetes mellitus, juvenile type, with hyperosmolar coma    | Diabetes |
| C102100 | diabetes mellitus, adult onset, with hyperosmolar coma      | Diabetes |
| C102z00 | diabetes mellitus nos with hyperosmolar coma                | Diabetes |
| C103y00 | other specified diabetes mellitus with coma                 | Diabetes |
| C103z00 | diabetes mellitus nos with ketoacidotic coma                | Diabetes |
| C104y00 | other specified diabetes mellitus with renal complications  | Diabetes |
| C104z00 | diabetes mellitis with nephropathy nos                      | Diabetes |



|         |                                                            |          |
|---------|------------------------------------------------------------|----------|
| C105z00 | diabetes mellitus nos with ophthalmic manifestation        | Diabetes |
| C106z00 | diabetes mellitus nos with neurological manifestation      | Diabetes |
| C107z00 | diabetes mellitus nos with peripheral circulatory disorder | Diabetes |
| C10E511 | type i diabetes mellitus with ulcer                        | Diabetes |
| C10E500 | type 1 diabetes mellitus with ulcer                        | Diabetes |
| C10E600 | type 1 diabetes mellitus with gangrene                     | Diabetes |
| C10E611 | type i diabetes mellitus with gangrene                     | Diabetes |
| C10E800 | type 1 diabetes mellitus - poor control                    | Diabetes |
| C10E811 | type i diabetes mellitus - poor control                    | Diabetes |
| C10E911 | type i diabetes mellitus maturity onset                    | Diabetes |
| C10E900 | type 1 diabetes mellitus maturity onset                    | Diabetes |
| C108z00 | unspecified diabetes mellitus with multiple complications  | Diabetes |
| C10F311 | type ii diabetes mellitus with multiple complications      | Diabetes |
| C10F300 | type 2 diabetes mellitus with multiple complications       | Diabetes |
| C10F400 | type 2 diabetes mellitus with ulcer                        | Diabetes |
| C10F411 | type ii diabetes mellitus with ulcer                       | Diabetes |
| C10F511 | type ii diabetes mellitus with gangrene                    | Diabetes |
| C10F500 | type 2 diabetes mellitus with gangrene                     | Diabetes |
| C10F711 | type ii diabetes mellitus - poor control                   | Diabetes |
| C10F700 | type 2 diabetes mellitus - poor control                    | Diabetes |
| C10A100 | malnutrition-related diabetes mellitus with ketoacidosis   | Diabetes |
| C10y.00 | diabetes mellitus with other specified manifestation       | Diabetes |
| C10yz00 | diabetes mellitus nos with other specified manifestation   | Diabetes |
| C10z.00 | diabetes mellitus with unspecified complication            | Diabetes |
| C10zz00 | diabetes mellitus nos with unspecified complication        | Diabetes |
| Cyu2000 | [x]other specified diabetes mellitus                       | Diabetes |
| Cyu2300 | [x]unspecified diabetes mellitus with renal complications  | Diabetes |
| F345000 | diabetic mononeuritis multiplex                            | Diabetes |
| F35z000 | diabetic mononeuritis nos                                  | Diabetes |
| F372000 | acute painful diabetic neuropathy                          | Diabetes |
| F372100 | chronic painful diabetic neuropathy                        | Diabetes |
| F372200 | asymptomatic diabetic neuropathy                           | Diabetes |
| F374z00 | polyneuropathy in disease nos                              | Diabetes |
| F420200 | preproliferative diabetic retinopathy                      | Diabetes |
| F420300 | advanced diabetic maculopathy                              | Diabetes |
| F420z00 | diabetic retinopathy nos                                   | Diabetes |
| F440700 | diabetic iritis                                            | Diabetes |
| 66Ai.00 | diabetic 6 month review                                    | Diabetes |
| C10EQ00 | type 1 diabetes mellitus with gastroparesis                | Diabetes |
| C10FR00 | type 2 diabetes mellitus with gastroparesis                | Diabetes |
| 8HTi.00 | referral to multidisciplinary diabetic clinic              | Diabetes |
| 9N1o.00 | seen in multidisciplinary diabetic clinic                  | Diabetes |
| 9N4p.00 | did not attend diabetic retinopathy clinic                 | Diabetes |
| 66Ak.00 | diabetic monitoring - lower risk albumin excretion         | Diabetes |
| 66Al.00 | diabetic monitoring - higher risk albumin excretion        | Diabetes |
| G73y000 | diabetic peripheral angiopathy                             | Diabetes |

|         |                                                              |          |
|---------|--------------------------------------------------------------|----------|
| K01x100 | nephrotic syndrome in diabetes mellitus                      | Diabetes |
| K01x111 | kimmelstiel - wilson disease                                 | Diabetes |
| Kyu0300 | [x]glomerular disorders in diabetes mellitus                 | Diabetes |
| L180500 | pre-existing diabetes mellitus, insulin-dependent            | Diabetes |
| L180600 | pre-existing diabetes mellitus, non-insulin-dependent        | Diabetes |
| L180700 | pre-existing malnutrition-related diabetes mellitus          | Diabetes |
| 8HHy.00 | referral to diabetic register                                | Diabetes |
| 93C4.00 | patient consent given for addition to diabetic register      | Diabetes |
| M037200 | cellulitis in diabetic foot                                  | Diabetes |
| 8HTk.00 | referral to diabetic eye clinic                              | Diabetes |
| M271000 | ischaemic ulcer diabetic foot                                | Diabetes |
| M271200 | mixed diabetic ulcer - foot                                  | Diabetes |
| N030000 | diabetic cheiroarthropathy                                   | Diabetes |
| N030011 | diabetic cheirography                                        | Diabetes |
| R054200 | [d]gangrene of toe in diabetic                               | Diabetes |
| R054300 | [d]widespread diabetic foot gangrene                         | Diabetes |
| TJ23z00 | adverse reaction to insulins and antidiabetic agents nos     | Diabetes |
| F372.12 | diabetic neuropathy                                          | Diabetes |
| C106.12 | diabetes mellitus with neuropathy                            | Diabetes |
| F3y0.00 | diabetic mononeuropathy                                      | Diabetes |
| F420400 | diabetic maculopathy                                         | Diabetes |
| C314.11 | renal diabetes                                               | Diabetes |
| K08yA11 | clinical diabetic nephropathy                                | Diabetes |
| K08yA00 | proteinuric diabetic nephropathy                             | Diabetes |
| U602311 | [x] adverse reaction to insulins and antidiabetic agents     | Diabetes |
| U60231E | [x] adverse reaction to insulins and antidiabetic agents nos | Diabetes |
| C10D.11 | maturity onset diabetes in youth type 2                      | Diabetes |
| Cyu2.00 | [x]diabetes mellitus                                         | Diabetes |
| F381300 | myasthenic syndrome due to diabetic amyotrophy               | Diabetes |
| 66AJ.00 | diabetic - poor control                                      | Diabetes |
| 42W..00 | hb. a1c - diabetic control                                   | Diabetes |
| 90LA.11 | diabetes monitored                                           | Diabetes |
| 68AB.00 | diabetic digital retinopathy screening offered               | Diabetes |
| 8HI1.00 | referral for diabetic retinopathy screening                  | Diabetes |
| 3883.00 | diabetes treatment satisfaction questionnaire                | Diabetes |
| 66AJ.11 | unstable diabetes                                            | Diabetes |
| 13L4.11 | diabetic child                                               | Diabetes |
| C10E411 | unstable type i diabetes mellitus                            | Diabetes |
| C10E400 | unstable type 1 diabetes mellitus                            | Diabetes |
| C10E412 | unstable insulin dependent diabetes mellitus                 | Diabetes |
| 9N2i.00 | seen by diabetic liaison nurse                               | Diabetes |
| ZLD7500 | discharge by diabetic liaison nurse                          | Diabetes |
| 2G5A.00 | o/e - right diabetic foot at risk                            | Diabetes |
| 2G5B.00 | o/e - left diabetic foot at risk                             | Diabetes |
| 3881.00 | education score - diabetes                                   | Diabetes |
| 14F4.00 | h/o: admission in last year for diabetes foot problem        | Diabetes |

|         |                                                              |          |
|---------|--------------------------------------------------------------|----------|
| 42c..00 | hba1 - diabetic control                                      | Diabetes |
| F420500 | advanced diabetic retinal disease                            | Diabetes |
| 8H7f.00 | referral to diabetes nurse                                   | Diabetes |
| 9NM0.00 | attending diabetes clinic                                    | Diabetes |
| 9N1v.00 | seen in diabetic eye clinic                                  | Diabetes |
| C10EA11 | type i diabetes mellitus without complication                | Diabetes |
| C10EA00 | type 1 diabetes mellitus without complication                | Diabetes |
| C10EA12 | insulin-dependent diabetes without complication              | Diabetes |
| C109900 | non-insulin-dependent diabetes mellitus without complication | Diabetes |
| C10F900 | type 2 diabetes mellitus without complication                | Diabetes |
| C10F911 | type ii diabetes mellitus without complication               | Diabetes |
| 66AV.00 | diabetic on insulin and oral treatment                       | Diabetes |
| C10EE00 | type 1 diabetes mellitus with hypoglycaemic coma             | Diabetes |
| C10EE12 | insulin dependent diabetes mellitus with hypoglycaemic coma  | Diabetes |
| C10FD00 | type 2 diabetes mellitus with hypoglycaemic coma             | Diabetes |
| C10FD11 | type ii diabetes mellitus with hypoglycaemic coma            | Diabetes |
| C10EH00 | type 1 diabetes mellitus with arthropathy                    | Diabetes |
| C10EJ00 | type 1 diabetes mellitus with neuropathic arthropathy        | Diabetes |
| C10FF11 | type ii diabetes mellitus with peripheral angiopathy         | Diabetes |
| C10FF00 | type 2 diabetes mellitus with peripheral angiopathy          | Diabetes |
| C109G00 | non-insulin dependent diabetes mellitus with arthropathy     | Diabetes |
| C10FG00 | type 2 diabetes mellitus with arthropathy                    | Diabetes |
| C10FG11 | type ii diabetes mellitus with arthropathy                   | Diabetes |
| C10FH11 | type ii diabetes mellitus with neuropathic arthropathy       | Diabetes |
| C10FH00 | type 2 diabetes mellitus with neuropathic arthropathy        | Diabetes |
| 13AB.00 | diabetic lipid lowering diet                                 | Diabetes |
| 13AC.00 | diabetic weight reducing diet                                | Diabetes |
| TJ23.00 | adverse reaction to insulins and antidiabetic agents         | Diabetes |
| 66An.00 | diabetes type 1 review                                       | Diabetes |
| 66Ao.00 | diabetes type 2 review                                       | Diabetes |
| 8Hl4.00 | referral to community diabetes specialist nurse              | Diabetes |
| C10C.00 | diabetes mellitus autosomal dominant                         | Diabetes |
| C10C.11 | maturity onset diabetes in youth                             | Diabetes |
| C109.11 | niddm - non-insulin dependent diabetes mellitus              | Diabetes |
| C10F.11 | type ii diabetes mellitus                                    | Diabetes |
| C10E.11 | type i diabetes mellitus                                     | Diabetes |
| C10N100 | cystic fibrosis related diabetes mellitus                    | Diabetes |
| 9OLF.00 | diabetes structured education programme completed            | Diabetes |
| 9OLG.00 | attended xpert diabetes structured education programme       | Diabetes |
| 9OLH.00 | attended dafne diabetes structured education programme       | Diabetes |
| 9OLJ.00 | dafne diabetes structured education programme completed      | Diabetes |
| 9OLK.00 | desmond diabetes structured education programme completed    | Diabetes |
| 9OLL.00 | xpert diabetes structured education programme completed      | Diabetes |
| 9OLM.00 | diabetes structured education programme declined             | Diabetes |
| 8Hj3.00 | referral to dafne diabetes structured education programme    | Diabetes |
| 8Hj4.00 | referral to desmond diabetes structured education programme  | Diabetes |

|         |                                                              |          |
|---------|--------------------------------------------------------------|----------|
| 8HJ5.00 | referral to xpert diabetes structured education programme    | Diabetes |
| 9NiA.00 | did not attend diabetes structured education programme       | Diabetes |
| 8I81.00 | did not complete diabetes structured education programme     | Diabetes |
| 8I82.00 | did not complete dafne diabetes structured education program | Diabetes |
| 9NiC.00 | did not attend dafne diabetes structured education programme | Diabetes |
| 9NiE.00 | did not attend xpert diabetes structured education programme | Diabetes |
| C109100 | non-insulin-dependent diabetes mellitus with ophthalm comps  | Diabetes |
| C109000 | non-insulin-dependent diabetes mellitus with renal comps     | Diabetes |
| 66AO.00 | date diabetic treatment stopp.                               | Diabetes |
| L180000 | diabetes mellitus - unspec whether in pregnancy/puerperium   | Diabetes |
| C10B.00 | diabetes mellitus induced by steroids                        | Diabetes |
| C107.11 | diabetes mellitus with gangrene                              | Diabetes |
| C103.00 | diabetes mellitus with ketoacidotic coma                     | Diabetes |
| C106.00 | diabetes mellitus with neurological manifestation            | Diabetes |
| C105.00 | diabetes mellitus with ophthalmic manifestation              | Diabetes |
| C107.00 | diabetes mellitus with peripheral circulatory disorder       | Diabetes |
| C106.13 | diabetes mellitus with polyneuropathy                        | Diabetes |
| C104.00 | diabetes mellitus with renal manifestation                   | Diabetes |
| C106100 | diabetes mellitus, adult onset, + neurological manifestation | Diabetes |
| C105100 | diabetes mellitus, adult onset, + ophthalmic manifestation   | Diabetes |
| C10z100 | diabetes mellitus, adult onset, + unspecified complication   | Diabetes |
| C100100 | diabetes mellitus, adult onset, no mention of complication   | Diabetes |
| C101100 | diabetes mellitus, adult onset, with ketoacidosis            | Diabetes |
| C103100 | diabetes mellitus, adult onset, with ketoacidotic coma       | Diabetes |
| C104100 | diabetes mellitus, adult onset, with renal manifestation     | Diabetes |
| C107200 | diabetes mellitus, adult with gangrene                       | Diabetes |
| C10y100 | diabetes mellitus, adult, + other specified manifestation    | Diabetes |
| C107100 | diabetes mellitus, adult, + peripheral circulatory disorder  | Diabetes |
| C107000 | diabetes mellitus, juvenile +peripheral circulatory disorder | Diabetes |
| C105000 | diabetes mellitus, juvenile type, + ophthalmic manifestation | Diabetes |
| C10z000 | diabetes mellitus, juvenile type, + unspecified complication | Diabetes |
| C100000 | diabetes mellitus, juvenile type, no mention of complication | Diabetes |
| C101000 | diabetes mellitus, juvenile type, with ketoacidosis          | Diabetes |
| C103000 | diabetes mellitus, juvenile type, with ketoacidotic coma     | Diabetes |
| C104000 | diabetes mellitus, juvenile type, with renal manifestation   | Diabetes |
| C106000 | diabetes mellitus, juvenile, + neurological manifestation    | Diabetes |
| 9OLA.00 | diabetes monitor. check done                                 | Diabetes |
| 9OL8.00 | diabetes monitor.phone invite                                | Diabetes |
| 9OL7.00 | diabetes monitor.verbal invite                               | Diabetes |
| 9OL4.00 | diabetes monitoring 1st letter                               | Diabetes |
| 9OL5.00 | diabetes monitoring 2nd letter                               | Diabetes |
| 9OL6.00 | diabetes monitoring 3rd letter                               | Diabetes |
| 3882.00 | diabetes well being questionnaire                            | Diabetes |
| C107.12 | diabetes with gangrene                                       | Diabetes |
| C106.11 | diabetic amyotrophy                                          | Diabetes |
| N030100 | diabetic charcot arthropathy                                 | Diabetes |

|         |                                                              |          |
|---------|--------------------------------------------------------------|----------|
| 8H4e.00 | referral to diabetes special interest general practitioner   | Diabetes |
| C10FS00 | maternally inherited diabetes mellitus                       | Diabetes |
| 66AY.00 | diabetic diet - good compliance                              | Diabetes |
| 66Aa.00 | diabetic diet - poor compliance                              | Diabetes |
| C109600 | non-insulin-dependent diabetes mellitus with retinopathy     | Diabetes |
| F381311 | diabetic amyotrophy                                          | Diabetes |
| C107400 | niddm with peripheral circulatory disorder                   | Diabetes |
| 66Aq.00 | diabetic foot screen                                         | Diabetes |
| C10A.00 | malnutrition-related diabetes mellitus                       | Diabetes |
| C10A000 | malnutrition-related diabetes mellitus with coma             | Diabetes |
| C10A500 | malnutritn-relat diabetes melitus wth periph circul complctn | Diabetes |
| C108400 | unstable insulin dependent diabetes mellitus                 | Diabetes |
| C108412 | unstable type 1 diabetes mellitus                            | Diabetes |
| C108411 | unstable type i diabetes mellitus                            | Diabetes |
| 9m00.00 | eligible for diabetic retinopathy screening                  | Diabetes |
| F464000 | diabetic cataract                                            | Diabetes |
| 2BBr.00 | impaired vision due to diabetic retinopathy                  | Diabetes |
| C100112 | non-insulin dependent diabetes mellitus                      | Diabetes |
| 9m05.00 | excluded from diabetic retinopathy screening as moved away   | Diabetes |
| 9m06.00 | excluded from diabetic retinopathy screening as deceased     | Diabetes |
| 9m08.00 | excluded from diabetic retinopathy screening as blind        | Diabetes |
| 9m04.00 | excluded from diabetic retinopathy screening                 | Diabetes |
| C108A00 | insulin-dependent diabetes without complication              | Diabetes |
| 2G5C.00 | foot abnormality - diabetes related                          | Diabetes |
| C108H00 | insulin dependent diabetes mellitus with arthropathy         | Diabetes |
| C108F00 | insulin dependent diabetes mellitus with diabetic cataract   | Diabetes |
| C108600 | insulin dependent diabetes mellitus with gangrene            | Diabetes |
| C108E00 | insulin dependent diabetes mellitus with hypoglycaemic coma  | Diabetes |
| C108B00 | insulin dependent diabetes mellitus with mononeuropathy      | Diabetes |
| C108300 | insulin dependent diabetes mellitus with multiple complicatn | Diabetes |
| C108D00 | insulin dependent diabetes mellitus with nephropathy         | Diabetes |
| C108C00 | insulin dependent diabetes mellitus with polyneuropathy      | Diabetes |
| C108700 | insulin dependent diabetes mellitus with retinopathy         | Diabetes |
| C108500 | insulin dependent diabetes mellitus with ulcer               | Diabetes |
| C108200 | insulin-dependent diabetes mellitus with neurological comps  | Diabetes |
| C108100 | insulin-dependent diabetes mellitus with ophthalmic comps    | Diabetes |
| C108000 | insulin-dependent diabetes mellitus with renal complications | Diabetes |
| C108J00 | insulin dependent diab mell with neuropathic arthropathy     | Diabetes |
| C108G00 | insulin dependent diab mell with peripheral angiopathy       | Diabetes |
| C108900 | insulin dependent diabetes maturity onset                    | Diabetes |
| C100011 | insulin dependent diabetes mellitus                          | Diabetes |
| C108.00 | insulin dependent diabetes mellitus                          | Diabetes |
| C108800 | insulin dependent diabetes mellitus - poor control           | Diabetes |
| 66AA.11 | injection sites - diabetic                                   | Diabetes |
| C10E.12 | insulin dependent diabetes mellitus                          | Diabetes |
| C107300 | iddm with peripheral circulatory disorder                    | Diabetes |

|         |                                                          |          |
|---------|----------------------------------------------------------|----------|
| C108.11 | iddm-insulin dependent diabetes mellitus                 | Diabetes |
| F372.11 | diabetic polyneuropathy                                  | Diabetes |
| Q441.00 | neonatal diabetes mellitus                               | Diabetes |
| C109J00 | insulin treated type 2 diabetes mellitus                 | Diabetes |
| C10D.00 | diabetes mellitus autosomal dominant type 2              | Diabetes |
| F420800 | high risk non proliferative diabetic retinopathy         | Diabetes |
| C109J12 | insulin treated type ii diabetes mellitus                | Diabetes |
| C108.12 | type 1 diabetes mellitus                                 | Diabetes |
| C108812 | type 1 diabetes mellitus - poor control                  | Diabetes |
| C108912 | type 1 diabetes mellitus maturity onset                  | Diabetes |
| C108E12 | type 1 diabetes mellitus with hypoglycaemic coma         | Diabetes |
| C108212 | type 1 diabetes mellitus with neurological complications | Diabetes |
| C108J12 | type 1 diabetes mellitus with neuropathic arthropathy    | Diabetes |
| C108112 | type 1 diabetes mellitus with ophthalmic complications   | Diabetes |
| C108012 | type 1 diabetes mellitus with renal complications        | Diabetes |
| C108712 | type 1 diabetes mellitus with retinopathy                | Diabetes |
| C108512 | type 1 diabetes mellitus with ulcer                      | Diabetes |
| C109.12 | type 2 diabetes mellitus                                 | Diabetes |
| C109712 | type 2 diabetes mellitus - poor control                  | Diabetes |
| C109G12 | type 2 diabetes mellitus with arthropathy                | Diabetes |
| C109E12 | type 2 diabetes mellitus with diabetic cataract          | Diabetes |
| C109512 | type 2 diabetes mellitus with gangrene                   | Diabetes |
| C109D12 | type 2 diabetes mellitus with hypoglycaemic coma         | Diabetes |
| 66AX.00 | diabetes: shared care in pregnancy - diabetol and obstet | Diabetes |
| C109312 | type 2 diabetes mellitus with multiple complications     | Diabetes |
| C109C12 | type 2 diabetes mellitus with nephropathy                | Diabetes |
| C109212 | type 2 diabetes mellitus with neurological complications | Diabetes |
| C109H12 | type 2 diabetes mellitus with neuropathic arthropathy    | Diabetes |
| C109112 | type 2 diabetes mellitus with ophthalmic complications   | Diabetes |
| C109F12 | type 2 diabetes mellitus with peripheral angiopathy      | Diabetes |
| C109012 | type 2 diabetes mellitus with renal complications        | Diabetes |
| C109612 | type 2 diabetes mellitus with retinopathy                | Diabetes |
| C109412 | type 2 diabetes mellitus with ulcer                      | Diabetes |
| C109912 | type 2 diabetes mellitus without complication            | Diabetes |
| C108.13 | type i diabetes mellitus                                 | Diabetes |
| C108811 | type i diabetes mellitus - poor control                  | Diabetes |
| C108911 | type i diabetes mellitus maturity onset                  | Diabetes |
| C108H11 | type i diabetes mellitus with arthropathy                | Diabetes |
| C108F11 | type i diabetes mellitus with diabetic cataract          | Diabetes |
| C108E11 | type i diabetes mellitus with hypoglycaemic coma         | Diabetes |
| C108B11 | type i diabetes mellitus with mononeuropathy             | Diabetes |
| C108311 | type i diabetes mellitus with multiple complications     | Diabetes |
| C108D11 | type i diabetes mellitus with nephropathy                | Diabetes |
| C108211 | type i diabetes mellitus with neurological complications | Diabetes |
| C108J11 | type i diabetes mellitus with neuropathic arthropathy    | Diabetes |
| C108C11 | type i diabetes mellitus with polyneuropathy             | Diabetes |

|         |                                                              |          |
|---------|--------------------------------------------------------------|----------|
| C108011 | type i diabetes mellitus with renal complications            | Diabetes |
| C108711 | type i diabetes mellitus with retinopathy                    | Diabetes |
| C108511 | type i diabetes mellitus with ulcer                          | Diabetes |
| C108A11 | type i diabetes mellitus without complication                | Diabetes |
| C109.13 | type ii diabetes mellitus                                    | Diabetes |
| C109711 | type ii diabetes mellitus - poor control                     | Diabetes |
| C109G11 | type ii diabetes mellitus with arthropathy                   | Diabetes |
| C109E11 | type ii diabetes mellitus with diabetic cataract             | Diabetes |
| C109511 | type ii diabetes mellitus with gangrene                      | Diabetes |
| C109D11 | type ii diabetes mellitus with hypoglycaemic coma            | Diabetes |
| C109A11 | type ii diabetes mellitus with mononeuropathy                | Diabetes |
| C109C11 | type ii diabetes mellitus with nephropathy                   | Diabetes |
| C109211 | type ii diabetes mellitus with neurological complications    | Diabetes |
| C109H11 | type ii diabetes mellitus with neuropathic arthropathy       | Diabetes |
| C109111 | type ii diabetes mellitus with ophthalmic complications      | Diabetes |
| C109F11 | type ii diabetes mellitus with peripheral angiopathy         | Diabetes |
| C109B11 | type ii diabetes mellitus with polyneuropathy                | Diabetes |
| C109011 | type ii diabetes mellitus with renal complications           | Diabetes |
| C109611 | type ii diabetes mellitus with retinopathy                   | Diabetes |
| C109411 | type ii diabetes mellitus with ulcer                         | Diabetes |
| C109911 | type ii diabetes mellitus without complication               | Diabetes |
| C109K00 | hyperosmolar non-ketotic state in type 2 diabetes mellitus   | Diabetes |
| F420.00 | diabetic retinopathy                                         | Diabetes |
| C10E012 | insulin-dependent diabetes mellitus with renal complications | Diabetes |
| C10E000 | type 1 diabetes mellitus with renal complications            | Diabetes |
| C10E112 | insulin-dependent diabetes mellitus with ophthalmic comps    | Diabetes |
| C10E100 | type 1 diabetes mellitus with ophthalmic complications       | Diabetes |
| C10E111 | type i diabetes mellitus with ophthalmic complications       | Diabetes |
| C10E212 | insulin-dependent diabetes mellitus with neurological comps  | Diabetes |
| C10E200 | type 1 diabetes mellitus with neurological complications     | Diabetes |
| C10E312 | insulin dependent diabetes mellitus with multiple complicat  | Diabetes |
| C10E300 | type 1 diabetes mellitus with multiple complications         | Diabetes |
| C10E311 | type i diabetes mellitus with multiple complications         | Diabetes |
| C10E512 | insulin dependent diabetes mellitus with ulcer               | Diabetes |
| C10E612 | insulin dependent diabetes mellitus with gangrene            | Diabetes |
| C10E712 | insulin dependent diabetes mellitus with retinopathy         | Diabetes |
| C10E700 | type 1 diabetes mellitus with retinopathy                    | Diabetes |
| C10E711 | type i diabetes mellitus with retinopathy                    | Diabetes |
| C10E812 | insulin dependent diabetes mellitus - poor control           | Diabetes |
| C10E912 | insulin dependent diabetes maturity onset                    | Diabetes |
| C10EB00 | type 1 diabetes mellitus with mononeuropathy                 | Diabetes |
| C10EC12 | insulin dependent diabetes mellitus with polyneuropathy      | Diabetes |
| C10EC00 | type 1 diabetes mellitus with polyneuropathy                 | Diabetes |
| C10EC11 | type i diabetes mellitus with polyneuropathy                 | Diabetes |
| C10ED12 | insulin dependent diabetes mellitus with nephropathy         | Diabetes |
| C10ED00 | type 1 diabetes mellitus with nephropathy                    | Diabetes |

|         |                                                             |          |
|---------|-------------------------------------------------------------|----------|
| C10EF12 | insulin dependent diabetes mellitus with diabetic cataract  | Diabetes |
| C10EF00 | type 1 diabetes mellitus with diabetic cataract             | Diabetes |
| C10EG00 | type 1 diabetes mellitus with peripheral angiopathy         | Diabetes |
| C10F000 | type 2 diabetes mellitus with renal complications           | Diabetes |
| C10F011 | type ii diabetes mellitus with renal complications          | Diabetes |
| C10F100 | type 2 diabetes mellitus with ophthalmic complications      | Diabetes |
| C10F111 | type ii diabetes mellitus with ophthalmic complications     | Diabetes |
| C10F200 | type 2 diabetes mellitus with neurological complications    | Diabetes |
| C10F211 | type ii diabetes mellitus with neurological complications   | Diabetes |
| C10F600 | type 2 diabetes mellitus with retinopathy                   | Diabetes |
| C10F611 | type ii diabetes mellitus with retinopathy                  | Diabetes |
| C10FA00 | type 2 diabetes mellitus with mononeuropathy                | Diabetes |
| C10FA11 | type ii diabetes mellitus with mononeuropathy               | Diabetes |
| C10FB00 | type 2 diabetes mellitus with polyneuropathy                | Diabetes |
| C10FB11 | type ii diabetes mellitus with polyneuropathy               | Diabetes |
| C10FC00 | type 2 diabetes mellitus with nephropathy                   | Diabetes |
| C10FC11 | type ii diabetes mellitus with nephropathy                  | Diabetes |
| C10FE00 | type 2 diabetes mellitus with diabetic cataract             | Diabetes |
| C10FE11 | type ii diabetes mellitus with diabetic cataract            | Diabetes |
| C10FJ00 | insulin treated type 2 diabetes mellitus                    | Diabetes |
| C10EK00 | type 1 diabetes mellitus with persistent proteinuria        | Diabetes |
| C10EL11 | type i diabetes mellitus with persistent microalbuminuria   | Diabetes |
| C10EM00 | type 1 diabetes mellitus with ketoacidosis                  | Diabetes |
| C10EM11 | type i diabetes mellitus with ketoacidosis                  | Diabetes |
| C10EN00 | type 1 diabetes mellitus with ketoacidotic coma             | Diabetes |
| C10EN11 | type i diabetes mellitus with ketoacidotic coma             | Diabetes |
| C10FL00 | type 2 diabetes mellitus with persistent proteinuria        | Diabetes |
| C10FL11 | type ii diabetes mellitus with persistent proteinuria       | Diabetes |
| C10FM00 | type 2 diabetes mellitus with persistent microalbuminuria   | Diabetes |
| C10FM11 | type ii diabetes mellitus with persistent microalbuminuria  | Diabetes |
| C10FN00 | type 2 diabetes mellitus with ketoacidosis                  | Diabetes |
| C10FN11 | type ii diabetes mellitus with ketoacidosis                 | Diabetes |
| C10FP00 | type 2 diabetes mellitus with ketoacidotic coma             | Diabetes |
| C10FP11 | type ii diabetes mellitus with ketoacidotic coma            | Diabetes |
| 9h41.00 | excepted from diabetes qual indicators: patient unsuitable  | Diabetes |
| C10EP00 | type 1 diabetes mellitus with exudative maculopathy         | Diabetes |
| C10EP11 | type i diabetes mellitus with exudative maculopathy         | Diabetes |
| C10FQ00 | type 2 diabetes mellitus with exudative maculopathy         | Diabetes |
| C10H000 | dm induced by non-steroid drugs without complication        | Diabetes |
| C10M.00 | lipoatrophic diabetes mellitus                              | Diabetes |
| 2BBk.00 | o/e - right eye stable treated prolif diabetic retinopathy  | Diabetes |
| 2BBI.00 | o/e - left eye stable treated prolif diabetic retinopathy   | Diabetes |
| 8Hj1.00 | family/carer referral to diabetes structured education prog | Diabetes |
| F420100 | proliferative diabetic retinopathy                          | Diabetes |
| ZC2C800 | dietary advice for diabetes mellitus                        | Diabetes |
| 250 CT  | diabetic cataract                                           | Diabetes |



|         |                                                      |                                 |
|---------|------------------------------------------------------|---------------------------------|
| ZL62500 | referral to diabetes nurse                           | Diabetes                        |
| ZL62600 | referral to diabetic liaison nurse                   | Diabetes                        |
| 250 AT  | diabetic amyotrophy                                  | Diabetes                        |
| 250 N   | diabetic nephropathy                                 | Diabetes                        |
| ZC2CA00 | dietary advice for type ii diabetes                  | Diabetes                        |
| ZRBH.00 | perceived control of insulin-dependent diabetes      | Diabetes                        |
| C104z00 | diabetes mellitus with nephropathy nos               | Diabetes                        |
| ZRB6.00 | diabetes wellbeing questionnaire                     | Diabetes                        |
| ZL22500 | under care of diabetic liaison nurse                 | Diabetes                        |
| 1434.00 | h/o: diabetes mellitus                               | Diabetes                        |
| ZRB4.00 | diabetes clinic satisfaction questionnaire           | Diabetes                        |
| ZRB5.11 | dtsq - diabetes treatment satisfaction questionnaire | Diabetes                        |
| ZC2C900 | dietary advice for type i diabetes                   | Diabetes                        |
| ZLA2500 | seen by diabetic liaison nurse                       | Diabetes                        |
| ZRB4.11 | csq - diabetes clinic satisfaction questionnaire     | Diabetes                        |
| ZRB5.00 | diabetes treatment satisfaction questionnaire        | Diabetes                        |
| ZRB6.11 | dwbq - diabetes wellbeing questionnaire              | Diabetes                        |
| 44I4200 | low serum potassium level                            | Fluid and electrolyte disorders |
| C362200 | lactic acidosis                                      | Fluid and electrolyte disorders |
| C363100 | respiratory alkalosis                                | Fluid and electrolyte disorders |
| C362100 | respiratory acidosis                                 | Fluid and electrolyte disorders |
| 44I4100 | raised serum potassium level                         | Fluid and electrolyte disorders |
| 44I8100 | raised serum calcium level                           | Fluid and electrolyte disorders |
| 44L2100 | blood magnesium abnormal                             | Fluid and electrolyte disorders |
| 46M2.00 | urine electrolytes abnormal                          | Fluid and electrolyte disorders |
| C36z100 | hypochloraemia                                       | Fluid and electrolyte disorders |
| C352z00 | disorder of magnesium metabolism nos                 | Fluid and electrolyte disorders |
| C354000 | hypocalcaemia nec                                    | Fluid and electrolyte disorders |
| C354200 | idiopathic hypercalcaemia                            | Fluid and electrolyte disorders |
| C354500 | familial benign hypercalcaemia                       | Fluid and electrolyte disorders |
| C354z00 | disorder of calcium metabolism nos                   | Fluid and electrolyte disorders |
| C362000 | metabolic acidosis nec                               | Fluid and electrolyte disorders |
| C362y00 | other specified acidosis                             | Fluid and electrolyte disorders |
| C363200 | metabolic alkalaemia                                 | Fluid and electrolyte disorders |
| C363y00 | other specified alkalosis                            | Fluid and electrolyte disorders |
| C363z00 | alkalosis nos                                        | Fluid and electrolyte disorders |
| C365z00 | volume depletion nos                                 | Fluid and electrolyte disorders |
| C36zz00 | electrolyte imbalance nos                            | Fluid and electrolyte disorders |
| C363000 | metabolic alkalosis                                  | Fluid and electrolyte disorders |
| C366111 | idiopathic fluid retention                           | Fluid and electrolyte disorders |
| C36A.00 | respiratory acidosis and metabolic alkalosis         | Fluid and electrolyte disorders |
| C354111 | secondary hypercalcaemia                             | Fluid and electrolyte disorders |
| C354900 | calcium deficiency                                   | Fluid and electrolyte disorders |
| C294400 | magnesium deficiency                                 | Fluid and electrolyte disorders |
| C363.00 | alkalosis                                            | Fluid and electrolyte disorders |
| C354100 | hypercalcaemia nec                                   | Fluid and electrolyte disorders |

|         |                                                              |                                 |
|---------|--------------------------------------------------------------|---------------------------------|
| C360.00 | hyperosmolality and or hypernatraemia                        | Fluid and electrolyte disorders |
| C36z.00 | disorders of fluid, electrolyte and acid-base balance nec    | Fluid and electrolyte disorders |
| 8B77.00 | potassium supplementation                                    | Fluid and electrolyte disorders |
| C367.00 | hyperkalaemia                                                | Fluid and electrolyte disorders |
| C365.00 | volume depletion                                             | Fluid and electrolyte disorders |
| C365100 | hypovolaemia                                                 | Fluid and electrolyte disorders |
| C360.11 | hypernatraemia                                               | Fluid and electrolyte disorders |
| C368.00 | hypokalaemia                                                 | Fluid and electrolyte disorders |
| C36z000 | hyperchloraemia                                              | Fluid and electrolyte disorders |
| C363500 | alkalaemia                                                   | Fluid and electrolyte disorders |
| C361.11 | hyponatraemia                                                | Fluid and electrolyte disorders |
| C36..00 | disorders of fluid, electrolyte and acid-base balance        | Fluid and electrolyte disorders |
| C352.00 | disorders of magnesium metabolism                            | Fluid and electrolyte disorders |
| C36..11 | electrolyte disorders                                        | Fluid and electrolyte disorders |
| C362900 | compensated metabolic acidosis                               | Fluid and electrolyte disorders |
| C361.00 | hyposmolality and or hyponatraemia                           | Fluid and electrolyte disorders |
| A788.00 | acquired immune deficiency syndrome                          | HIV/AIDS                        |
| 66j..00 | human immunodeficiency virus monitoring                      | HIV/AIDS                        |
| 66j0.00 | human immunodeficiency virus annual review                   | HIV/AIDS                        |
| A788.11 | human immunodeficiency virus infection                       | HIV/AIDS                        |
| A788100 | asymptomatic human immunodeficiency virus infection          | HIV/AIDS                        |
| 43h9.00 | hiv proviral deoxyribonucleic acid polymerase chain reaction | HIV/AIDS                        |
| 43w3.00 | human immunodeficiency virus rna/dna ratio                   | HIV/AIDS                        |
| 9kl..00 | hiv pos gen health check serv declind - enhanc service admin | HIV/AIDS                        |
| 43j7.00 | hiv 1 nucleic acid detection                                 | HIV/AIDS                        |
| 8Hle.00 | referral to community hiv nurse specialist                   | HIV/AIDS                        |
| A789311 | hiv disease resulting in pneumocystis jirovecii pneumonia    | HIV/AIDS                        |
| A789511 | hiv disease resulting in kaposi sarcoma                      | HIV/AIDS                        |
| L179.00 | hiv disease complicating pregnancy childbirth puerperium     | HIV/AIDS                        |
| 9Nt1000 | seen by community hiv (human immunodeficiency virus) nurse   | HIV/AIDS                        |
| 43C3.11 | hiv positive                                                 | HIV/AIDS                        |
| A789A00 | hiv disease resulting in wasting syndrome                    | HIV/AIDS                        |
| 65QA.00 | aids carrier                                                 | HIV/AIDS                        |
| 65VE.00 | notification of aids                                         | HIV/AIDS                        |
| A788400 | human immunodeficiency virus with neurological disease       | HIV/AIDS                        |
| A788600 | human immunodeficiency virus with secondary cancers          | HIV/AIDS                        |
| A788y00 | human immunodeficiency virus with other clinical findings    | HIV/AIDS                        |
| A788z00 | acquired human immunodeficiency virus infection syndrome nos | HIV/AIDS                        |
| A789.00 | human immunodef virus resulting in other disease             | HIV/AIDS                        |
| A789000 | hiv disease resulting in mycobacterial infection             | HIV/AIDS                        |
| A789100 | hiv disease resulting in cytomegaloviral disease             | HIV/AIDS                        |
| A789200 | hiv disease resulting in candidiasis                         | HIV/AIDS                        |
| A789400 | hiv disease resulting in multiple infections                 | HIV/AIDS                        |
| A789800 | hiv disease resulting in multiple malignant neoplasms        | HIV/AIDS                        |
| AyuC.00 | [x]human immunodeficiency virus disease                      | HIV/AIDS                        |
| AyuC000 | [x]hiv disease resulting in other bacterial infections       | HIV/AIDS                        |

|         |                                                               |              |
|---------|---------------------------------------------------------------|--------------|
| AyuC100 | [x]hiv disease resulting in other viral infections            | HIV/AIDS     |
| AyuC200 | [x]hiv disease resulting in other mycoses                     | HIV/AIDS     |
| AyuC600 | [x]hiv disease resulting in other non-hodgkin's lymphoma      | HIV/AIDS     |
| AyuC800 | [x]hiv disease resulting in other malignant neoplasms         | HIV/AIDS     |
| AyuC900 | [x]hiv disease resulting in unspecified malignant neoplasm    | HIV/AIDS     |
| AyuCC00 | [x]hiv disease resulting in other specified conditions        | HIV/AIDS     |
| AyuCD00 | [x]unspecified human immunodeficiency virus [hiv] disease     | HIV/AIDS     |
| R109.00 | [d]laboratory evidence of human immunodeficiency virus [hiv]  | HIV/AIDS     |
| ZV01A00 | [v]asymptomatic human immunodeficiency virus infection status | HIV/AIDS     |
| A788000 | acute human immunodeficiency virus infection                  | HIV/AIDS     |
| Eu02400 | [x]dementia in human immunodef virus [hiv] disease            | HIV/AIDS     |
| AyuC700 | [x]hiv dis reslt/oth mal neopl/lymph,h'matopoetc+reltd tissu  | HIV/AIDS     |
| AyuCB00 | [x]hiv disease result/haematological+immunologic abnorms,nec  | HIV/AIDS     |
| AyuCA00 | [x]hiv disease resulting in multiple diseases ce              | HIV/AIDS     |
| AyuC300 | [x]hiv disease resulting in multiple infections               | HIV/AIDS     |
| AyuC400 | [x]hiv disease resulting/other infectious+parasitic diseases  | HIV/AIDS     |
| AyuC500 | [x]hiv disease resulting/unspcf infectious+parasitic disease  | HIV/AIDS     |
| 4J34.00 | hiv viral load                                                | HIV/AIDS     |
| 4J3F.00 | human immunodeficiency virus viral load by log rank           | HIV/AIDS     |
| A789X00 | hiv dis reslt/oth mal neopl/lymph,h'matopoetc+reltd tissu     | HIV/AIDS     |
| A789700 | hiv dis resulting oth types of non-hodgkin's lymphoma         | HIV/AIDS     |
| A788U00 | hiv disease result/haematological+immunologic abnorms,nec     | HIV/AIDS     |
| A789500 | hiv disease resulting in kaposi's sarcoma                     | HIV/AIDS     |
| A788V00 | hiv disease resulting in multiple diseases ce                 | HIV/AIDS     |
| A789300 | hiv disease resulting in pneumocystis carinii pneumonia       | HIV/AIDS     |
| A788W00 | hiv disease resulting in unspecified malignant neoplasm       | HIV/AIDS     |
| A788X00 | hiv disease resulting/unspcf infectious+parasitic disease     | HIV/AIDS     |
| A788200 | hiv infection with persistent generalised lymphadenopathy     | HIV/AIDS     |
| 43WK.00 | human immunodeficiency virus antibody level                   | HIV/AIDS     |
| A788300 | human immunodeficiency virus with constitutional disease      | HIV/AIDS     |
| A788500 | human immunodeficiency virus with secondary infection         | HIV/AIDS     |
| L7990A  | acquired immune deficiency syndrome                           | HIV/AIDS     |
| G21..00 | hypertensive heart disease                                    | Hypertension |
| G220.00 | malignant hypertensive renal disease                          | Hypertension |
| G231.00 | benign hypertensive heart and renal disease                   | Hypertension |
| G230.00 | malignant hypertensive heart and renal disease                | Hypertension |
| 67H8.00 | lifestyle advice regarding hypertension                       | Hypertension |
| F421300 | hypertensive retinopathy                                      | Hypertension |
| G200.00 | malignant essential hypertension                              | Hypertension |
| G221.00 | benign hypertensive renal disease                             | Hypertension |
| G23..00 | hypertensive heart and renal disease                          | Hypertension |
| G240.00 | secondary malignant hypertension                              | Hypertension |
| F404200 | blind hypertensive eye                                        | Hypertension |
| 9N1y200 | seen in hypertension clinic                                   | Hypertension |
| G24z.00 | secondary hypertension nos                                    | Hypertension |
| 662P000 | hypertension 9 month review                                   | Hypertension |

|         |                                                              |              |
|---------|--------------------------------------------------------------|--------------|
| 813N.00 | hypertension treatment refused                               | Hypertension |
| 662c.00 | hypertension six month review                                | Hypertension |
| 662b.00 | moderate hypertension control                                | Hypertension |
| 662d.00 | hypertension annual review                                   | Hypertension |
| G25..00 | stage 1 hypertension (nice - nat ins for hth clin excl 2011) | Hypertension |
| G26..00 | severe hypertension (nat inst for health clinical ex 2011)   | Hypertension |
| G28..00 | stage 2 hypertension (nice - nat ins for hth clin excl 2011) | Hypertension |
| 661M600 | hypertension self-management plan agreed                     | Hypertension |
| 8BL0.00 | patient on maximal tolerated antihypertensive therapy        | Hypertension |
| 90I..00 | hypertension monitoring admin.                               | Hypertension |
| G26..11 | severe hypertension                                          | Hypertension |
| G25..11 | stage 1 hypertension                                         | Hypertension |
| G27..00 | hypertension resistant to drug therapy                       | Hypertension |
| 8CR4.00 | hypertension clinical management plan                        | Hypertension |
| G241000 | secondary benign renovascular hypertension                   | Hypertension |
| 14A2.00 | h/o: hypertension                                            | Hypertension |
| 90I..11 | hypertension clinic admin.                                   | Hypertension |
| 6146200 | hypertension induced by oral contraceptive pill              | Hypertension |
| 6627.00 | good hypertension control                                    | Hypertension |
| 6628.00 | poor hypertension control                                    | Hypertension |
| 6629.00 | hypertension:follow-up default                               | Hypertension |
| 662F.00 | hypertension treatm. started                                 | Hypertension |
| 662G.00 | hypertensive treatm.changed                                  | Hypertension |
| 8HT5.00 | referral to hypertension clinic                              | Hypertension |
| G210z00 | malignant hypertensive heart disease nos                     | Hypertension |
| G211z00 | benign hypertensive heart disease nos                        | Hypertension |
| G21zz00 | hypertensive heart disease nos                               | Hypertension |
| G222.00 | hypertensive renal disease with renal failure                | Hypertension |
| G23z.00 | hypertensive heart and renal disease nos                     | Hypertension |
| G240000 | secondary malignant renovascular hypertension                | Hypertension |
| G240z00 | secondary malignant hypertension nos                         | Hypertension |
| G241.00 | secondary benign hypertension                                | Hypertension |
| G241z00 | secondary benign hypertension nos                            | Hypertension |
| G244.00 | hypertension secondary to endocrine disorders                | Hypertension |
| G24zz00 | secondary hypertension nos                                   | Hypertension |
| G24z000 | secondary renovascular hypertension nos                      | Hypertension |
| G24z100 | hypertension secondary to drug                               | Hypertension |
| G2y..00 | other specified hypertensive disease                         | Hypertension |
| G2z..00 | hypertensive disease nos                                     | Hypertension |
| Gyu2.00 | [x]hypertensive diseases                                     | Hypertension |
| Gyu2000 | [x]other secondary hypertension                              | Hypertension |
| Gyu2100 | [x]hypertension secondary to other renal disorders           | Hypertension |
| G201.00 | benign essential hypertension                                | Hypertension |
| 7Q01y00 | other specified high cost hypertension drugs                 | Hypertension |
| U60C51A | [x] adverse reaction to antihypertensives nos                | Hypertension |
| U60C511 | [x] adverse reaction to other antihypertensives              | Hypertension |

|         |                                                             |                |
|---------|-------------------------------------------------------------|----------------|
| G20z.00 | essential hypertension nos                                  | Hypertension   |
| G22z.00 | hypertensive renal disease nos                              | Hypertension   |
| 90IA.11 | hypertension monitored                                      | Hypertension   |
| G21z011 | cardiomegaly - hypertensive                                 | Hypertension   |
| 662..12 | hypertension monitoring                                     | Hypertension   |
| 6620.00 | on treatment for hypertension                               | Hypertension   |
| 8B26.00 | antihypertensive therapy                                    | Hypertension   |
| G211100 | benign hypertensive heart disease with ccf                  | Hypertension   |
| G2...11 | bp - hypertensive disease                                   | Hypertension   |
| 662q.00 | trial reduction of antihypertensive therapy                 | Hypertension   |
| G24..00 | secondary hypertension                                      | Hypertension   |
| 8IA5.00 | trial withdrawal of antihypertensive therapy declined       | Hypertension   |
| G211.00 | benign hypertensive heart disease                           | Hypertension   |
| G2...00 | hypertensive disease                                        | Hypertension   |
| G210100 | malignant hypertensive heart disease with ccf               | Hypertension   |
| G210000 | malignant hypertensive heart disease without ccf            | Hypertension   |
| G21z.00 | hypertensive heart disease nos                              | Hypertension   |
| G21z100 | hypertensive heart disease nos with ccf                     | Hypertension   |
| G21z000 | hypertensive heart disease nos without ccf                  | Hypertension   |
| G232.00 | hypertensive heart&renal dis wth (congestive) heart failure | Hypertension   |
| G234.00 | hyperten heart&renal dis+both(congestv)heart and renal fail | Hypertension   |
| 662P.00 | hypertension monitoring                                     | Hypertension   |
| G20z.11 | hypertension nos                                            | Hypertension   |
| G203.00 | diastolic hypertension                                      | Hypertension   |
| G672.11 | hypertensive crisis                                         | Hypertension   |
| G210.00 | malignant hypertensive heart disease                        | Hypertension   |
| G202.00 | systolic hypertension                                       | Hypertension   |
| G20..00 | essential hypertension                                      | Hypertension   |
| G20..12 | primary hypertension                                        | Hypertension   |
| C04..12 | thyroid deficiency                                          | Hypothyroidism |
| C04z.12 | thyroid insufficiency                                       | Hypothyroidism |
| C030.00 | pendred's syndrome                                          | Hypothyroidism |
| C0A5.00 | subclinical iodine-deficiency hypothyroidism                | Hypothyroidism |
| C04..00 | acquired hypothyroidism                                     | Hypothyroidism |
| C04z.11 | pretibial myxoedema - hypothyroid                           | Hypothyroidism |
| C044.00 | postinfectious hypothyroidism                               | Hypothyroidism |
| C040.11 | post ablative hypothyroidism                                | Hypothyroidism |
| 90j..00 | hypothyroidism monitoring administration                    | Hypothyroidism |
| 8CR5.00 | hypothyroidism clinical management plan                     | Hypothyroidism |
| 1432.00 | h/o: hypothyroidism                                         | Hypothyroidism |
| 90j2.00 | hypothyroidism monitoring third letter                      | Hypothyroidism |
| 90j0.00 | hypothyroidism monitoring first letter                      | Hypothyroidism |
| 90j1.00 | hypothyroidism monitoring second letter                     | Hypothyroidism |
| C040.00 | postsurgical hypothyroidism                                 | Hypothyroidism |
| 90j3.00 | hypothyroidism monitoring verbal invite                     | Hypothyroidism |
| C03..00 | congenital hypothyroidism                                   | Hypothyroidism |

|         |                                                        |                |
|---------|--------------------------------------------------------|----------------|
| C03y.00 | other specified congenital hypothyroidism              | Hypothyroidism |
| C041.00 | other postablative hypothyroidism                      | Hypothyroidism |
| C041000 | irradiation hypothyroidism                             | Hypothyroidism |
| C041z00 | postablative hypothyroidism nos                        | Hypothyroidism |
| C042.00 | iodine hypothyroidism                                  | Hypothyroidism |
| C043.00 | other iatrogenic hypothyroidism                        | Hypothyroidism |
| C043000 | hypothyroidism resulting from para-aminosalicylic acid | Hypothyroidism |
| C043100 | hypothyroidism resulting from phenylbutazone           | Hypothyroidism |
| C043200 | hypothyroidism resulting from resorcinol               | Hypothyroidism |
| C043z00 | iatrogenic hypothyroidism nos                          | Hypothyroidism |
| C04y.00 | other acquired hypothyroidism                          | Hypothyroidism |
| C04z000 | premature puberty due to hypothyroidism                | Hypothyroidism |
| F381400 | myasthenic syndrome due to hypothyroidism              | Hypothyroidism |
| Q433700 | neonatal jaundice with congenital hypothyroidism       | Hypothyroidism |
| C03z.12 | cretinism                                              | Hypothyroidism |
| C03y100 | congenital hypothyroidism without goitre               | Hypothyroidism |
| C04z.13 | hypothyroid goitre, acquired                           | Hypothyroidism |
| C046.00 | autoimmune myxoedema                                   | Hypothyroidism |
| C045.00 | acquired atrophy of thyroid                            | Hypothyroidism |
| C04z100 | myxoedema coma                                         | Hypothyroidism |
| C03z.00 | congenital hypothyroidism nos                          | Hypothyroidism |
| C04z.00 | hypothyroidism nos                                     | Hypothyroidism |
| 90j4.00 | hypothyroidism monitoring telephone invitation         | Hypothyroidism |
| Cyu1100 | [x]other sp cified hypothyroidism                      | Hypothyroidism |
| C031.00 | goitrous cretin                                        | Hypothyroidism |
| C03y000 | congenital hypothyroidism with diffuse goitre          | Hypothyroidism |
| C04..11 | myxoedema                                              | Hypothyroidism |
| C03z.11 | congenital thyroid insufficiency                       | Hypothyroidism |
| C03..11 | cretinism                                              | Hypothyroidism |
| 66BB.00 | hypothyroidism annual review                           | Hypothyroidism |
| C04..13 | hypothyroidism                                         | Hypothyroidism |
| F395300 | myopathy due to myxoedema                              | Hypothyroidism |
| C047.00 | subclinical hypothyroidism                             | Hypothyroidism |
| J615812 | indian childhood cirrhosis                             | Liver disease  |
| 141F.00 | history of viral hepatitis                             | Liver disease  |
| J661100 | chronic cholangitis                                    | Liver disease  |
| J622.00 | hepatic coma                                           | Liver disease  |
| G850.00 | oesophageal varices with bleeding                      | Liver disease  |
| ZV02612 | [v]hepatitis australia antigen carrier                 | Liver disease  |
| J601100 | subacute hepatitis - noninfective                      | Liver disease  |
| A707300 | chronic viral hepatitis b                              | Liver disease  |
| J632000 | hepatitis in malaria                                   | Liver disease  |
| J615711 | congestive cirrhosis                                   | Liver disease  |
| A053.00 | amoebic liver abscess                                  | Liver disease  |
| J612.11 | florid cirrhosis                                       | Liver disease  |
| J614.00 | chronic hepatitis                                      | Liver disease  |

|         |                                                              |               |
|---------|--------------------------------------------------------------|---------------|
| A916100 | secondary syphilitic hepatitis                               | Liver disease |
| A72x000 | mumps hepatitis                                              | Liver disease |
| 7Q05300 | rsv treatment and hepatitis c treatment drugs band 1         | Liver disease |
| A705z00 | other specified viral hepatitis without mention of coma nos  | Liver disease |
| 760F300 | rigid oesophagoscopic injection sclerotherapy oesoph varices | Liver disease |
| 9kR..00 | chronic hepatitis annual review - enhanced services admin    | Liver disease |
| 9kV..00 | hepatitis c screening positive - enhanced services admin     | Liver disease |
| 9kX..00 | hepatitis status 6 months post treatment - enhanced serv adm | Liver disease |
| 9kZ..00 | hepatitis b screening positive - enhanced services admin     | Liver disease |
| C370800 | cystic fibrosis related cirrhosis                            | Liver disease |
| J611.00 | acute alcoholic hepatitis                                    | Liver disease |
| 4JQD.11 | hepatitis c pcr positive                                     | Liver disease |
| 8LH..00 | liver transplant planned                                     | Liver disease |
| 4JQD.00 | hepatitis c viral ribonucleic acid pcr positive              | Liver disease |
| J661200 | recurrent cholangitis                                        | Liver disease |
| 43jJ.00 | hepatitis d nucleic acid detection                           | Liver disease |
| 4JQ3.00 | hepatitis c virus genotype                                   | Liver disease |
| 43jG.00 | hepatitis b nucleic acid detection                           | Liver disease |
| 43j5.00 | hepatitis c nucleic acid detection                           | Liver disease |
| C350012 | pigmentary cirrhosis of liver                                | Liver disease |
| 43k0.00 | hepatitis b e antigen level                                  | Liver disease |
| A709.00 | viral hepatitis without hepatic coma                         | Liver disease |
| A707.00 | chronic viral hepatitis                                      | Liver disease |
| A70z100 | acute viral hepatitis nos                                    | Liver disease |
| 43w7.00 | hepatitis a nucleic acid detection                           | Liver disease |
| J615111 | postnecrotic cirrhosis of liver                              | Liver disease |
| 4JQF.00 | hepatitis c antigen positive                                 | Liver disease |
| J616100 | secondary biliary cirrhosis                                  | Liver disease |
| A70A.00 | hepatitis c genotype 1                                       | Liver disease |
| A70B.00 | hepatitis c genotype 2                                       | Liver disease |
| A70C.00 | hepatitis c genotype 3                                       | Liver disease |
| A70D.00 | hepatitis c genotype 4                                       | Liver disease |
| 14i..00 | h/o hepatitis c antiviral drug therapy                       | Liver disease |
| 9NgR.00 | on hepatitis c treatment plan                                | Liver disease |
| J63B.00 | autoimmune hepatitis                                         | Liver disease |
| J615.00 | cirrhosis - non alcoholic                                    | Liver disease |
| J622.11 | encephalopathy - hepatic                                     | Liver disease |
| 67P4200 | discussion about liver transplantation                       | Liver disease |
| A701.00 | viral (infectious) hepatitis a                               | Liver disease |
| A701.11 | infective hepatitis                                          | Liver disease |
| 7800112 | piggy back liver transplant                                  | Liver disease |
| J615A00 | pipe-stem portal cirrhosis                                   | Liver disease |
| G851.00 | oesophageal varices without bleeding                         | Liver disease |
| ZV02C00 | [v]hepatitis c carrier                                       | Liver disease |
| J631100 | hepatitis in cytomegalic inclusion virus                     | Liver disease |
| 14C5.00 | h/o: liver disease                                           | Liver disease |

|         |                                                         |               |
|---------|---------------------------------------------------------|---------------|
| Q434100 | giant cell hepatitis causing neonatal jaundice          | Liver disease |
| J615.11 | portal cirrhosis                                        | Liver disease |
| 43B5.00 | hepatitis e antigen present                             | Liver disease |
| J612.12 | laennec's cirrhosis                                     | Liver disease |
| 43M2.00 | hepatitis a test positive                               | Liver disease |
| J600200 | acute yellow atrophy                                    | Liver disease |
| 65Q7.00 | viral hepatitis carrier                                 | Liver disease |
| 7609.00 | open operations on oesophageal varices                  | Liver disease |
| 7609400 | open injection sclerotherapy to oesophageal varices     | Liver disease |
| 7609z00 | open operation on oesophageal varices nos               | Liver disease |
| 760C500 | fibroptic endoscopic banding of oesophageal varices     | Liver disease |
| 760F400 | rigid oesophagoscopy banding of oesophageal varices     | Liver disease |
| 141E.00 | history of hepatitis b                                  | Liver disease |
| 7800200 | replacement of previous liver transplant                | Liver disease |
| J61y800 | nonalcoholic steatohepatitis                            | Liver disease |
| A700.00 | viral hepatitis a with coma                             | Liver disease |
| A702.00 | viral hepatitis b with coma                             | Liver disease |
| A704.00 | other specified viral hepatitis with coma               | Liver disease |
| A704000 | viral hepatitis c with coma                             | Liver disease |
| A704z00 | other specified viral hepatitis with hepatic coma nos   | Liver disease |
| A705.00 | other specified viral hepatitis without coma            | Liver disease |
| A705000 | viral hepatitis c without mention of hepatic coma       | Liver disease |
| A707100 | chronic viral hepatitis b without delta-agent           | Liver disease |
| A70z.00 | unspecified viral hepatitis                             | Liver disease |
| A785200 | cytomegaloviral hepatitis                               | Liver disease |
| AD05.00 | toxoplasma hepatitis                                    | Liver disease |
| J632300 | hepatitis in toxoplasmosis                              | Liver disease |
| AE23.00 | sequelae of viral hepatitis                             | Liver disease |
| AyuB000 | [x]other specified acute viral hepatitis                | Liver disease |
| AyuB100 | [x]other chronic viral hepatitis                        | Liver disease |
| AyuB200 | [x]chronic viral hepatitis, unspecified                 | Liver disease |
| C376100 | alpha-1-antitrypsin hepatitis                           | Liver disease |
| G852.00 | oesophageal varices in diseases ec                      | Liver disease |
| G852000 | oesophageal varices with bleeding in diseases ec        | Liver disease |
| G852100 | oesophageal varices without bleeding in diseases ec     | Liver disease |
| G852z00 | oesophageal varices in diseases ec nos                  | Liver disease |
| Gyu9400 | [x]oesophageal varices in diseases classified elsewhere | Liver disease |
| J600011 | acute liver failure                                     | Liver disease |
| J601200 | subacute yellow atrophy                                 | Liver disease |
| J61..00 | cirrhosis and chronic liver disease                     | Liver disease |
| J614100 | chronic active hepatitis                                | Liver disease |
| J614111 | autoimmune chronic active hepatitis                     | Liver disease |
| J614300 | recurrent hepatitis                                     | Liver disease |
| J614y00 | chronic hepatitis unspecified                           | Liver disease |
| J614z00 | chronic hepatitis nos                                   | Liver disease |
| J615000 | unilobular portal cirrhosis                             | Liver disease |



|         |                                                              |               |
|---------|--------------------------------------------------------------|---------------|
| J615300 | diffuse nodular cirrhosis                                    | Liver disease |
| J615400 | fatty portal cirrhosis                                       | Liver disease |
| J615600 | capsular portal cirrhosis                                    | Liver disease |
| J615B00 | toxic portal cirrhosis                                       | Liver disease |
| J615D00 | bacterial portal cirrhosis                                   | Liver disease |
| J615F00 | syphilitic portal cirrhosis                                  | Liver disease |
| J615G00 | zooparasitic portal cirrhosis                                | Liver disease |
| J615H00 | infectious cirrhosis nos                                     | Liver disease |
| J615y00 | portal cirrhosis unspecified                                 | Liver disease |
| J616200 | biliary cirrhosis of children                                | Liver disease |
| J616z00 | biliary cirrhosis nos                                        | Liver disease |
| J61y.00 | other non-alcoholic chronic liver disease                    | Liver disease |
| J61y300 | portal fibrosis without cirrhosis                            | Liver disease |
| J61yz00 | other non-alcoholic chronic liver disease nos                | Liver disease |
| J61z.00 | chronic liver disease nos                                    | Liver disease |
| J62..00 | liver abscess and sequelae of chronic liver disease          | Liver disease |
| J620.00 | liver abscess - excluding amoebic liver abscess              | Liver disease |
| J620000 | liver abscess due to portal pyaemia                          | Liver disease |
| J620100 | liver abscess due to cholangitis                             | Liver disease |
| J620200 | liver abscess via hepatic artery                             | Liver disease |
| J620300 | liver abscess via umbilicus                                  | Liver disease |
| J620z00 | liver abscess nos                                            | Liver disease |
| J62z.00 | liver abscess and chronic liver disease causing sequelae nos | Liver disease |
| J631.00 | hepatitis in viral diseases ec                               | Liver disease |
| J631000 | hepatitis in coxsackie virus                                 | Liver disease |
| J631400 | hepatitis in yellow fever                                    | Liver disease |
| J631500 | hepatitis in other viral disease                             | Liver disease |
| J631z00 | hepatitis in viral diseases ec nos                           | Liver disease |
| J632.00 | hepatitis in other infectious diseases ec                    | Liver disease |
| J632200 | hepatitis in secondary syphilis                              | Liver disease |
| J632z00 | hepatitis in infectious diseases ec nos                      | Liver disease |
| J633.00 | hepatitis unspecified                                        | Liver disease |
| J633000 | toxic hepatitis                                              | Liver disease |
| J633z00 | hepatitis unspecified nos                                    | Liver disease |
| J635.00 | toxic liver disease                                          | Liver disease |
| J635000 | toxic liver disease with cholestasis                         | Liver disease |
| J635100 | toxic liver disease with hepatic necrosis                    | Liver disease |
| J635200 | toxic liver disease with acute hepatitis                     | Liver disease |
| J635300 | toxic liver disease with chronic persistent hepatitis        | Liver disease |
| J635400 | toxic liver disease with chronic lobular hepatitis           | Liver disease |
| J635500 | toxic liver disease with chronic active hepatitis            | Liver disease |
| J635600 | toxic liver disease with fibrosis and cirrhosis of liver     | Liver disease |
| 9Op1.00 | hepatitis c screening offered                                | Liver disease |
| J661600 | obliterative cholangitis                                     | Liver disease |
| J661700 | primary sclerosing cholangitis                               | Liver disease |
| J661800 | secondary sclerosing cholangitis                             | Liver disease |

|         |                                                         |               |
|---------|---------------------------------------------------------|---------------|
| J661900 | sclerosing cholangitis unspecified                      | Liver disease |
| Jyu7100 | [x]other and unspecified cirrhosis of liver             | Liver disease |
| Jyu7200 | [x]other specified inflammatory liver diseases          | Liver disease |
| Jyu7600 | [x]toxic liver disease, unspecified                     | Liver disease |
| Jyu7700 | [x]granulomatous hepatitis, not elsewhere classified    | Liver disease |
| BB5D411 | [m]hepatocellular adenoma                               | Liver disease |
| 43jW.00 | hepatitis e nucleic acid detection                      | Liver disease |
| PB62z00 | congenital cystic liver disease nos                     | Liver disease |
| Q409.00 | congenital viral hepatitis                              | Liver disease |
| Q409000 | congenital hepatitis a infection                        | Liver disease |
| Q409z00 | congenital viral hepatitis nos                          | Liver disease |
| Q434000 | perinatal hepatitis causing jaundice, unspecified       | Liver disease |
| SP08600 | liver transplant failure and rejection                  | Liver disease |
| SP14211 | liver failure as a complication of care                 | Liver disease |
| SP14300 | hepatorenal syndrome as a complication of care          | Liver disease |
| 7Q05200 | hepatitis b treatment drugs band 1                      | Liver disease |
| 7805211 | exploration of liver transplant                         | Liver disease |
| J63y100 | nonspecific reactive hepatitis                          | Liver disease |
| A98yy11 | gonococcal hepatitis                                    | Liver disease |
| A705100 | acute delta-(super)infection of hepatitis b carrier     | Liver disease |
| A70G.00 | acute hepatitis c                                       | Liver disease |
| A705200 | acute hepatitis e                                       | Liver disease |
| A707000 | chronic viral hepatitis b with delta-agent              | Liver disease |
| J617.00 | alcoholic hepatitis                                     | Liver disease |
| J62y.12 | liver failure nos                                       | Liver disease |
| J615z13 | cirrhosis of liver nos                                  | Liver disease |
| J615z14 | laennec's cirrhosis, non-alcoholic                      | Liver disease |
| A98yy13 | gonococcal perihepatitis                                | Liver disease |
| J625.11 | [x] liver failure                                       | Liver disease |
| 7609y00 | other specified open operation on oesophageal varices   | Liver disease |
| J615100 | multilobular portal cirrhosis                           | Liver disease |
| J615700 | cardiac portal cirrhosis                                | Liver disease |
| J615800 | juvenile portal cirrhosis                               | Liver disease |
| J615z00 | non-alcoholic cirrhosis nos                             | Liver disease |
| J62y.00 | other sequelae of chronic liver disease                 | Liver disease |
| J616.00 | biliary cirrhosis                                       | Liver disease |
| 65V3.11 | hepatitis notification                                  | Liver disease |
| 2J2..00 | hepatitis a status                                      | Liver disease |
| AyuJ900 | [x]sequelae of viral hepatitis                          | Liver disease |
| AyuB.00 | [x]viral hepatitis                                      | Liver disease |
| J617000 | chronic alcoholic hepatitis                             | Liver disease |
| G852200 | oesophageal varices in cirrhosis of the liver           | Liver disease |
| G852300 | oesophageal varices in alcoholic cirrhosis of the liver | Liver disease |
| 2J23.00 | hepatitis a - current infection                         | Liver disease |
| G858.00 | oesophageal varices nos                                 | Liver disease |
| J600100 | acute hepatitis - noninfective                          | Liver disease |

|         |                                                              |                       |
|---------|--------------------------------------------------------------|-----------------------|
| ZV02B00 | [v]hepatitis b carrier                                       | Liver disease         |
| ZV02600 | [v]viral hepatitis carrier                                   | Liver disease         |
| ZV42700 | [v]liver transplanted                                        | Liver disease         |
| ZV7C000 | [v]assessment for liver transplant                           | Liver disease         |
| J612.00 | alcoholic cirrhosis of liver                                 | Liver disease         |
| G85..11 | oesophageal varices                                          | Liver disease         |
| J615500 | hypertrophic portal cirrhosis                                | Liver disease         |
| 7800111 | auxillary liver transplant                                   | Liver disease         |
| PB62000 | congenital polycystic liver disease                          | Liver disease         |
| PB62100 | fibrocystic liver disease                                    | Liver disease         |
| J616000 | primary biliary cirrhosis                                    | Liver disease         |
| 7L1f.00 | compensation for liver failure                               | Liver disease         |
| 7L1fz00 | compensation for liver failure nos                           | Liver disease         |
| J614200 | chronic aggressive hepatitis                                 | Liver disease         |
| A707200 | chronic viral hepatitis c                                    | Liver disease         |
| A707X00 | chronic viral hepatitis, unspecified                         | Liver disease         |
| J615C00 | xanthomatous portal cirrhosis                                | Liver disease         |
| J623.00 | portal hypertension                                          | Liver disease         |
| PB62.00 | congenital cystic liver disease                              | Liver disease         |
| Q409100 | congenital hepatitis b infection                             | Liver disease         |
| J615z12 | cryptogenic cirrhosis of liver                               | Liver disease         |
| A703.00 | viral (serum) hepatitis b                                    | Liver disease         |
| L176500 | viral hepatitis comp pregnancy, childbirth & the puerperium  | Liver disease         |
| 9kZ..11 | hepatitis b screening positive                               | Liver disease         |
| 9kV..11 | hepatitis c screening positive                               | Liver disease         |
| J614000 | chronic persistent hepatitis                                 | Liver disease         |
| 760C300 | fibrooptic endoscopic injection sclerotherapy oesoph varices | Liver disease         |
| A70..00 | viral hepatitis                                              | Liver disease         |
| J615z11 | macronodular cirrhosis of liver                              | Liver disease         |
| 7609300 | local ligation of oesophageal varices                        | Liver disease         |
| TB00200 | liver transplant with complication, without blame            | Liver disease         |
| C310400 | glycogenosis with hepatic cirrhosis                          | Liver disease         |
| J63X.00 | granulomatous hepatitis, not elsewhere classified            | Liver disease         |
| J631600 | hepatitis + adenovirus                                       | Liver disease         |
| 43B4.00 | hepatitis b surface antig +ve                                | Liver disease         |
| J631200 | hepatitis in infectious mononucleosis                        | Liver disease         |
| A705400 | hepatitis non a non b                                        | Liver disease         |
| A70z000 | hepatitis c                                                  | Liver disease         |
| J624.00 | hepatorenal syndrome                                         | Liver disease         |
| J614400 | chronic lobular hepatitis                                    | Liver disease         |
| J635X00 | toxic liver disease, unspecified                             | Liver disease         |
| 573 B   | hepatic coma                                                 | Liver disease         |
| 5719PH  | portal hypertension                                          | Liver disease         |
| ZC2CH11 | dietary advice for liver disease                             | Liver disease         |
| G310.00 | postmyocardial infarction syndrome                           | Myocardial infarction |
| G307.00 | acute subendocardial infarction                              | Myocardial infarction |

|         |                                                              |                       |
|---------|--------------------------------------------------------------|-----------------------|
| G35X.00 | subsequent myocardial infarction of unspecified site         | Myocardial infarction |
| G303.00 | acute inferoposterior infarction                             | Myocardial infarction |
| 14AT.00 | history of myocardial infarction                             | Myocardial infarction |
| G30X000 | acute st segment elevation myocardial infarction             | Myocardial infarction |
| G307100 | acute non-st segment elevation myocardial infarction         | Myocardial infarction |
| G30..12 | coronary thrombosis                                          | Myocardial infarction |
| G30..16 | thrombosis - coronary                                        | Myocardial infarction |
| G38..00 | postoperative myocardial infarction                          | Myocardial infarction |
| G380.00 | postoperative transmural myocardial infarction anterior wall | Myocardial infarction |
| G381.00 | postoperative transmural myocardial infarction inferior wall | Myocardial infarction |
| G383.00 | postoperative transmural myocardial infarction unspec site   | Myocardial infarction |
| G30..15 | mi - acute myocardial infarction                             | Myocardial infarction |
| G32..12 | personal history of myocardial infarction                    | Myocardial infarction |
| 7929111 | percut translum coronary thrombolytic therapy- streptokinase | Myocardial infarction |
| 7929100 | percut transluminal coronary thrombolysis with streptokinase | Myocardial infarction |
| 323..00 | ecg: myocardial infarction                                   | Myocardial infarction |
| 3232.00 | ecg: old myocardial infarction                               | Myocardial infarction |
| 323Z.00 | ecg: myocardial infarct nos                                  | Myocardial infarction |
| G311011 | mi - myocardial infarction aborted                           | Myocardial infarction |
| G301.00 | other specified anterior myocardial infarction               | Myocardial infarction |
| G301z00 | anterior myocardial infarction nos                           | Myocardial infarction |
| G304.00 | posterior myocardial infarction nos                          | Myocardial infarction |
| G305.00 | lateral myocardial infarction nos                            | Myocardial infarction |
| G306.00 | true posterior myocardial infarction                         | Myocardial infarction |
| G308.00 | inferior myocardial infarction nos                           | Myocardial infarction |
| G30y.00 | other acute myocardial infarction                            | Myocardial infarction |
| G30yz00 | other acute myocardial infarction nos                        | Myocardial infarction |
| G30z.00 | acute myocardial infarction nos                              | Myocardial infarction |
| G35..00 | subsequent myocardial infarction                             | Myocardial infarction |
| G350.00 | subsequent myocardial infarction of anterior wall            | Myocardial infarction |
| G351.00 | subsequent myocardial infarction of inferior wall            | Myocardial infarction |
| G353.00 | subsequent myocardial infarction of other sites              | Myocardial infarction |
| Gyu3500 | [x]subsequent myocardial infarction of other sites           | Myocardial infarction |
| Gyu3600 | [x]subsequent myocardial infarction of unspecified site      | Myocardial infarction |
| G344.00 | silent myocardial ischaemia                                  | Myocardial infarction |
| G30..17 | silent myocardial infarction                                 | Myocardial infarction |
| Gyu3400 | [x]acute transmural myocardial infarction of unspecif site   | Myocardial infarction |
| G30..14 | heart attack                                                 | Myocardial infarction |
| G32..00 | old myocardial infarction                                    | Myocardial infarction |
| G32..11 | healed myocardial infarction                                 | Myocardial infarction |
| G307000 | acute non-q wave infarction                                  | Myocardial infarction |
| 14AH.00 | h/o: myocardial infarction in last year                      | Myocardial infarction |
| G384.00 | postoperative subendocardial myocardial infarction           | Myocardial infarction |
| G38z.00 | postoperative myocardial infarction, unspecified             | Myocardial infarction |
| G300.00 | acute anterolateral infarction                               | Myocardial infarction |
| G301100 | acute anteroseptal infarction                                | Myocardial infarction |

|         |                                                              |                        |
|---------|--------------------------------------------------------------|------------------------|
| G302.00 | acute inferolateral infarction                               | Myocardial infarction  |
| G30X.00 | acute transmural myocardial infarction of unspecif site      | Myocardial infarction  |
| G30..13 | cardiac rupture following myocardial infarction (mi)         | Myocardial infarction  |
| G36..00 | certain current complication follow acute myocardial infarct | Myocardial infarction  |
| 889A.00 | diab mellit insulin-glucose infus acute myocardial infarct   | Myocardial infarction  |
| G311000 | myocardial infarction aborted                                | Myocardial infarction  |
| 14A3.00 | h/o: myocardial infarct <60                                  | Myocardial infarction  |
| 14A4.00 | h/o: myocardial infarct >60                                  | Myocardial infarction  |
| G30..00 | acute myocardial infarction                                  | Myocardial infarction  |
| G30B.00 | acute posterolateral myocardial infarction                   | Myocardial infarction  |
| 429 AH  | heart attack                                                 | Myocardial infarction  |
| F251011 | tonic-clonic epilepsy                                        | Neurological disorders |
| F150.11 | infantile spinal muscular atrophy                            | Neurological disorders |
| F250y00 | other specified generalised nonconvulsive epilepsy           | Neurological disorders |
| F135000 | hemiballismus                                                | Neurological disorders |
| F25A.00 | juvenile myoclonic epilepsy                                  | Neurological disorders |
| 147F.00 | history of parkinson's disease                               | Neurological disorders |
| 8IAb.00 | multiple sclerosis review declined                           | Neurological disorders |
| R003400 | [d]nocturnal seizure                                         | Neurological disorders |
| 67IJ000 | pre-conception advice for patients with epilepsy             | Neurological disorders |
| 67AF.00 | pregnancy advice for patients with epilepsy                  | Neurological disorders |
| 8IAg.00 | contraceptive advice for patients with epilepsy declined     | Neurological disorders |
| 8IAh.00 | pre-conception advice for patients with epilepsy declined    | Neurological disorders |
| 8IAi.00 | pregnancy advice for patients with epilepsy declined         | Neurological disorders |
| P235.00 | x-linked hydrocephalus                                       | Neurological disorders |
| R003z11 | [d]seizure nos                                               | Neurological disorders |
| F21y211 | binswanger's encephalopathy                                  | Neurological disorders |
| F25X.00 | status epilepticus, unspecified                              | Neurological disorders |
| F252.00 | petit mal status                                             | Neurological disorders |
| F152300 | pseudobulbar palsy                                           | Neurological disorders |
| F040111 | cerebellar abscess                                           | Neurological disorders |
| P100z00 | spina bifida with hydrocephalus nos                          | Neurological disorders |
| P110000 | spina bifida without hydrocephalus, site unspecified         | Neurological disorders |
| F114.00 | acquired obstructive hydrocephalus                           | Neurological disorders |
| 667K.00 | epilepsy limits activities                                   | Neurological disorders |
| 9h6..00 | exception reporting: epilepsy quality indicators             | Neurological disorders |
| F151200 | adult spinal muscular atrophy                                | Neurological disorders |
| 667G.00 | epilepsy restricts employment                                | Neurological disorders |
| 667H.00 | epilepsy prevents employment                                 | Neurological disorders |
| F15..00 | anterior horn cell disease                                   | Neurological disorders |
| 667M.00 | epilepsy management plan given                               | Neurological disorders |
| F152000 | amyotrophic lateral sclerosis                                | Neurological disorders |
| F152100 | progressive muscular atrophy                                 | Neurological disorders |
| F25y100 | gelastic epilepsy                                            | Neurological disorders |
| F255100 | sensory induced epilepsy                                     | Neurological disorders |
| 1B1W.00 | transient epileptic amnesia                                  | Neurological disorders |

|         |                                                              |                        |
|---------|--------------------------------------------------------------|------------------------|
| F21y300 | central demyelination of corpus callosum                     | Neurological disorders |
| F14..00 | spinocerebellar disease                                      | Neurological disorders |
| F12X.00 | secondary parkinsonism, unspecified                          | Neurological disorders |
| 667J.00 | epilepsy impairs education                                   | Neurological disorders |
| 9mD0.00 | multiple sclerosis monitoring first letter                   | Neurological disorders |
| 9mD1.00 | multiple sclerosis monitoring second letter                  | Neurological disorders |
| F207.00 | relapsing and remitting multiple sclerosis                   | Neurological disorders |
| G021.00 | rheumatic chorea without mention of heart involvement        | Neurological disorders |
| 8IB2.00 | contraceptiv advice for patients with epilepsy not indicated | Neurological disorders |
| 8Hkv.00 | referral to community multiple sclerosis team                | Neurological disorders |
| 8BIF.00 | epilepsy medication review                                   | Neurological disorders |
| 667E.00 | epilepsy care arrangement                                    | Neurological disorders |
| F25..00 | epilepsy                                                     | Neurological disorders |
| F140.00 | friedreich's ataxia                                          | Neurological disorders |
| F29y300 | toxic encephalopathy                                         | Neurological disorders |
| F251600 | grand mal seizure                                            | Neurological disorders |
| 667N.00 | epilepsy severity                                            | Neurological disorders |
| 667Q.00 | 1 to 12 seizures a year                                      | Neurological disorders |
| 667R.00 | 2 to 4 seizures a month                                      | Neurological disorders |
| 667S.00 | 1 to 7 seizures a week                                       | Neurological disorders |
| 667T.00 | daily seizures                                               | Neurological disorders |
| 667V.00 | many seizures a day                                          | Neurological disorders |
| 667W.00 | emergency epilepsy treatment since last appointment          | Neurological disorders |
| 1O30.00 | epilepsy confirmed                                           | Neurological disorders |
| F254500 | complex partial epileptic seizure                            | Neurological disorders |
| F11X.00 | post-traumatic hydrocephalus, unspecified                    | Neurological disorders |
| J622.11 | encephalopathy - hepatic                                     | Neurological disorders |
| F251000 | grand mal (major) epilepsy                                   | Neurological disorders |
| F250000 | petit mal (minor) epilepsy                                   | Neurological disorders |
| F253.00 | grand mal status                                             | Neurological disorders |
| F253.11 | status epilepticus                                           | Neurological disorders |
| F121.00 | parkinsonism secondary to drugs                              | Neurological disorders |
| F135100 | paroxysmal choreo-athetosis                                  | Neurological disorders |
| F255.00 | partial epilepsy without impairment of consciousness         | Neurological disorders |
| F255z00 | partial epilepsy without impairment of consciousness nos     | Neurological disorders |
| F255y00 | partial epilepsy without impairment of consciousness os      | Neurological disorders |
| F25E.00 | stress-induced epilepsy                                      | Neurological disorders |
| SC20000 | traumatic epilepsy                                           | Neurological disorders |
| 1473.00 | h/o: epilepsy                                                | Neurological disorders |
| F251111 | otohara syndrome                                             | Neurological disorders |
| 9Of3.00 | epilepsy monitoring verbal invite                            | Neurological disorders |
| 297A.00 | o/e - parkinsonian tremor                                    | Neurological disorders |
| 2987.00 | o/e -parkinson flexion posture                               | Neurological disorders |
| F250.00 | generalised nonconvulsive epilepsy                           | Neurological disorders |
| 667..00 | epilepsy monitoring                                          | Neurological disorders |
| 6672.00 | follow-up epilepsy assessment                                | Neurological disorders |

|         |                                                              |                        |
|---------|--------------------------------------------------------------|------------------------|
| 6674.00 | epilepsy associated problems                                 | Neurological disorders |
| 6677.00 | epilepsy drug side effects                                   | Neurological disorders |
| 6678.00 | epilepsy treatment changed                                   | Neurological disorders |
| 6679.00 | epilepsy treatment started                                   | Neurological disorders |
| 667A.00 | epilepsy treatment stopped                                   | Neurological disorders |
| 667Z.00 | epilepsy monitoring nos                                      | Neurological disorders |
| F208.00 | secondary progressive multiple sclerosis                     | Neurological disorders |
| F206.00 | primary progressive multiple sclerosis                       | Neurological disorders |
| P22z.11 | cerebellar hypoplasia                                        | Neurological disorders |
| 2987.11 | o/e - parkinson posture                                      | Neurological disorders |
| F037.00 | transverse myelitis                                          | Neurological disorders |
| F1y0.00 | fragile x associated tremor ataxia syndrome                  | Neurological disorders |
| BBbW.00 | [m]cerebellar sarcoma nos                                    | Neurological disorders |
| F103100 | cerebral degeneration in mucopolysaccharidoses               | Neurological disorders |
| F10z.00 | childhood cerebral degenerations nos                         | Neurological disorders |
| F113.00 | acquired communicating hydrocephalus                         | Neurological disorders |
| F113z00 | communicating hydrocephalus - acquired nos                   | Neurological disorders |
| F12z.00 | parkinson's disease nos                                      | Neurological disorders |
| F130300 | parkinsonism with orthostatic hypotension                    | Neurological disorders |
| F132200 | myoclonic encephalopathy                                     | Neurological disorders |
| F135.00 | other choreas                                                | Neurological disorders |
| F135z00 | other choreas nos                                            | Neurological disorders |
| F142200 | dyssynergia cerebellaris myoclonica                          | Neurological disorders |
| F142z00 | primary cerebellar degeneration nos                          | Neurological disorders |
| F144.00 | cerebellar ataxia in diseases ec                             | Neurological disorders |
| F144200 | cerebellar ataxia due to neoplasia                           | Neurological disorders |
| F144z00 | cerebellar ataxia in disease nos                             | Neurological disorders |
| F14y.00 | other spinocerebellar diseases                               | Neurological disorders |
| F14yz00 | other spinocerebellar disease nos                            | Neurological disorders |
| F14z.00 | spinocerebellar disease nos                                  | Neurological disorders |
| F151000 | unspecified spinal muscular atrophy                          | Neurological disorders |
| F151z00 | spinal muscular atrophy nos                                  | Neurological disorders |
| F15y.00 | other anterior horn cell disease                             | Neurological disorders |
| F15z.00 | anterior horn cell disease nos                               | Neurological disorders |
| F201.00 | multiple sclerosis of the spinal cord                        | Neurological disorders |
| F202.00 | generalised multiple sclerosis                               | Neurological disorders |
| F203.00 | exacerbation of multiple sclerosis                           | Neurological disorders |
| F20z.00 | multiple sclerosis nos                                       | Neurological disorders |
| F21..00 | other central nervous system demyelinating diseases          | Neurological disorders |
| F21y.00 | other specified central nervous system demyelinating disease | Neurological disorders |
| F21yz00 | other specified central nervous system demyelination nos     | Neurological disorders |
| F21z.00 | central nervous system demyelination nos                     | Neurological disorders |
| F250200 | epileptic seizures - atonic                                  | Neurological disorders |
| F250300 | epileptic seizures - akinetic                                | Neurological disorders |
| F251100 | neonatal myoclonic epilepsy                                  | Neurological disorders |
| F251200 | epileptic seizures - clonic                                  | Neurological disorders |

|         |                                                             |                        |
|---------|-------------------------------------------------------------|------------------------|
| F251300 | epileptic seizures - myoclonic                              | Neurological disorders |
| F251400 | epileptic seizures - tonic                                  | Neurological disorders |
| F251y00 | other specified generalised convulsive epilepsy             | Neurological disorders |
| F251z00 | generalised convulsive epilepsy nos                         | Neurological disorders |
| F254.00 | partial epilepsy with impairment of consciousness           | Neurological disorders |
| F254000 | temporal lobe epilepsy                                      | Neurological disorders |
| F254200 | psychosensory epilepsy                                      | Neurological disorders |
| F254400 | epileptic automatism                                        | Neurological disorders |
| F254z00 | partial epilepsy with impairment of consciousness nos       | Neurological disorders |
| F255200 | somatosensory epilepsy                                      | Neurological disorders |
| F255311 | partial epilepsy with autonomic symptoms                    | Neurological disorders |
| F255300 | visceral reflex epilepsy                                    | Neurological disorders |
| F255400 | visual reflex epilepsy                                      | Neurological disorders |
| F255500 | unilateral epilepsy                                         | Neurological disorders |
| F256z00 | infantile spasms nos                                        | Neurological disorders |
| F257.00 | kojevnikov's epilepsy                                       | Neurological disorders |
| F25y.00 | other forms of epilepsy                                     | Neurological disorders |
| F25y000 | cursive (running) epilepsy                                  | Neurological disorders |
| F25yz00 | other forms of epilepsy nos                                 | Neurological disorders |
| F283.00 | unspecified encephalopathy                                  | Neurological disorders |
| F365.00 | neuropathy in association with hereditary ataxia            | Neurological disorders |
| 666A.00 | multiple sclerosis review                                   | Neurological disorders |
| Fyu1000 | [x]other hereditary ataxias                                 | Neurological disorders |
| Fyu2000 | [x]other drug-induced secondary parkinsonism                | Neurological disorders |
| Fyu2100 | [x]other secondary parkinsonism                             | Neurological disorders |
| Fyu2200 | [x]parkinsonism in diseases classified elsewhere            | Neurological disorders |
| Fyu2600 | [x]other chorea                                             | Neurological disorders |
| Fyu2900 | [x]secondary parkinsonism, unspecified                      | Neurological disorders |
| Fyu4.00 | [x]demyelinating diseases of the central nervous system     | Neurological disorders |
| Fyu4000 | [x]other specified acute disseminated demyelination         | Neurological disorders |
| Fyu4200 | [x]acute disseminated demyelination, unspecified            | Neurological disorders |
| Fyu5000 | [x]other generalized epilepsy and epileptic syndromes       | Neurological disorders |
| Fyu5100 | [x]other epilepsy                                           | Neurological disorders |
| Fyu5200 | [x]other status epilepticus                                 | Neurological disorders |
| Fyu5900 | [x]status epilepticus, unspecified                          | Neurological disorders |
| FyuA100 | [x]other hydrocephalus                                      | Neurological disorders |
| FyuA400 | [x]hydrocephalus in neoplastic disease classified elsewhere | Neurological disorders |
| FyuAG00 | [x]post-traumatic hydrocephalus, unspecified                | Neurological disorders |
| G02z.00 | rheumatic chorea nos                                        | Neurological disorders |
| 8CS1.00 | multiple sclerosis care plan agreed                         | Neurological disorders |
| F255600 | simple partial epileptic seizure                            | Neurological disorders |
| 9Of5.00 | epilepsy monitoring call first letter                       | Neurological disorders |
| 9Of6.00 | epilepsy monitoring call second letter                      | Neurological disorders |
| P100.00 | unspecified spina bifida with hydrocephalus                 | Neurological disorders |
| P100000 | spina bifida with hydrocephalus, unspecified                | Neurological disorders |
| P100100 | cervical spina bifida with hydrocephalus                    | Neurological disorders |



|         |                                                         |                        |
|---------|---------------------------------------------------------|------------------------|
| P100200 | thoracic spina bifida with hydrocephalus                | Neurological disorders |
| P100300 | lumbar spina bifida with hydrocephalus                  | Neurological disorders |
| P102200 | thoracic spina bifida with hydrocephalus - open         | Neurological disorders |
| P102300 | lumbar spina bifida with hydrocephalus - open           | Neurological disorders |
| P102400 | sacral spina bifida with hydrocephalus - open           | Neurological disorders |
| P102z00 | spina bifida with hydrocephalus - open nos              | Neurological disorders |
| P103.00 | spina bifida with hydrocephalus - closed                | Neurological disorders |
| P103300 | lumbar spina bifida with hydrocephalus - closed         | Neurological disorders |
| P103400 | sacral spina bifida with hydrocephalus - closed         | Neurological disorders |
| P104.00 | spina bifida with hydrocephalus of late onset           | Neurological disorders |
| P10y.00 | other specified spina bifida with hydrocephalus         | Neurological disorders |
| P10z.00 | spina bifida with hydrocephalus nos                     | Neurological disorders |
| P11..00 | spina bifida without mention of hydrocephalus           | Neurological disorders |
| P110100 | cervical spina bifida without mention of hydrocephalus  | Neurological disorders |
| P110200 | thoracic spina bifida without mention of hydrocephalus  | Neurological disorders |
| P110300 | lumbar spina bifida without mention of hydrocephalus    | Neurological disorders |
| P117200 | thoracic spina bifida without hydrocephalus - open      | Neurological disorders |
| P117300 | lumbar spina bifida without hydrocephalus - open        | Neurological disorders |
| P117400 | sacral spina bifida without hydrocephalus - open        | Neurological disorders |
| P117z00 | spina bifida without hydrocephalus - open nos           | Neurological disorders |
| P118.00 | spina bifida without hydrocephalus - closed             | Neurological disorders |
| P118000 | unspecified spina bifida without hydrocephalus - closed | Neurological disorders |
| P118100 | cervical spina bifida without hydrocephalus - closed    | Neurological disorders |
| P118300 | lumbar spina bifida without hydrocephalus - closed      | Neurological disorders |
| P118400 | sacral spina bifida without hydrocephalus - closed      | Neurological disorders |
| P23z.00 | congenital hydrocephalus nos                            | Neurological disorders |
| Pyu0100 | [x]other congenital hydrocephalus                       | Neurological disorders |
| Pyu0400 | [x]unspecified spina bifida with hydrocephalus          | Neurological disorders |
| 666B.00 | multiple sclerosis multidisciplinary review             | Neurological disorders |
| R003300 | [d]reflex anoxic seizure                                | Neurological disorders |
| R013000 | [d]ataxia nos                                           | Neurological disorders |
| SL6yz00 | antiparkinsonian drug poisoning nos                     | Neurological disorders |
| SL6z.00 | anticonvulsant or antiparkinsonian drug poisoning nos   | Neurological disorders |
| TJ64z00 | adverse reaction to antiparkinsonism drugs nos          | Neurological disorders |
| F123.00 | postencephalitic parkinsonism                           | Neurological disorders |
| F037000 | varicella transverse myelitis                           | Neurological disorders |
| F146.00 | early onset cerebellar ataxia with hypogonadism         | Neurological disorders |
| F135200 | drug-induced chorea                                     | Neurological disorders |
| F255011 | focal epilepsy                                          | Neurological disorders |
| F250400 | juvenile absence epilepsy                               | Neurological disorders |
| F250500 | lennox-gastaut syndrome                                 | Neurological disorders |
| F259.11 | ohtahara syndrome                                       | Neurological disorders |
| F25G.00 | severe myoclonic epilepsy in infancy                    | Neurological disorders |
| F25C.00 | drug-induced epilepsy                                   | Neurological disorders |
| F25D.00 | menstrual epilepsy                                      | Neurological disorders |
| 667B.00 | nocturnal epilepsy                                      | Neurological disorders |

|         |                                                              |                        |
|---------|--------------------------------------------------------------|------------------------|
| F25y300 | complex partial status epilepticus                           | Neurological disorders |
| F115.00 | hydrocephalus                                                | Neurological disorders |
| U606719 | [x] adverse react to anticonvuls or antiparkinson drug nos   | Neurological disorders |
| U606.11 | [x] adverse react to anticonvulsants & anti-parkinsons drugs | Neurological disorders |
| U606711 | [x] adverse reaction to antiparkinsonism drug                | Neurological disorders |
| U606718 | [x] adverse reaction to antiparkinsonism drugs nos           | Neurological disorders |
| 7Q04100 | amyotrophic lateral sclerosis drugs band 1                   | Neurological disorders |
| C253.00 | wernicke's encephalopathy                                    | Neurological disorders |
| Eu80300 | [x]acquired aphasia with epilepsy [landau - kleffner]        | Neurological disorders |
| U606.00 | [x]antiepilept + antiparksn drug caus advers eff therap use  | Neurological disorders |
| U606700 | [x]antiparkinsonism drugs caus advers effects in therap use  | Neurological disorders |
| F25H.00 | generalised seizure                                          | Neurological disorders |
| A413.11 | progressive multifocal leukoencephalopathy                   | Neurological disorders |
| Eu02400 | [x]dementia in human immunodef virus [hiv] disease           | Neurological disorders |
| P102.14 | rachischisis with hydrocephalus                              | Neurological disorders |
| P102.13 | myelocoele with hydrocephalus                                | Neurological disorders |
| P102.11 | fissured spine with hydrocephalus                            | Neurological disorders |
| P103z11 | thoracolumbar spina bifida with hydrocephalus - closed       | Neurological disorders |
| Eu05y11 | [x]epileptic psychosis nos                                   | Neurological disorders |
| Eu06013 | [x]limbic epilepsy personality                               | Neurological disorders |
| F142.00 | primary cerebellar degeneration                              | Neurological disorders |
| F132100 | progressive myoclonic epilepsy                               | Neurological disorders |
| F143.00 | cerebellar ataxia nos                                        | Neurological disorders |
| F25z.00 | epilepsy nos                                                 | Neurological disorders |
| P102.00 | spina bifida with hydrocephalus - open                       | Neurological disorders |
| P117.00 | spina bifida without hydrocephalus - open                    | Neurological disorders |
| P118z00 | spina bifida without hydrocephalus - closed nos              | Neurological disorders |
| P11y.00 | other specified spina bifida without hydrocephalus           | Neurological disorders |
| P11z.00 | spina bifida without mention of hydrocephalus nos            | Neurological disorders |
| 2994.00 | o/e-festination-parkinson gait                               | Neurological disorders |
| U606600 | [x]oth unspec antiepileptics caus adverse eff in therap use  | Neurological disorders |
| 90f4.00 | epilepsy monitoring telephone invite                         | Neurological disorders |
| F20..00 | multiple sclerosis                                           | Neurological disorders |
| Fyu4100 | [x]other specified demyelinating diseases/the cns            | Neurological disorders |
| F210.00 | neuromyelitis optica                                         | Neurological disorders |
| Q402311 | congenital hydrocephalus due to toxoplasmosis                | Neurological disorders |
| F255012 | motor epilepsy                                               | Neurological disorders |
| F255000 | jacksonian, focal or motor epilepsy                          | Neurological disorders |
| F25z.11 | fit (in known epileptic) nos                                 | Neurological disorders |
| F21X.00 | acute disseminated demyelination, unspecified                | Neurological disorders |
| 667C.00 | epilepsy control good                                        | Neurological disorders |
| 667D.00 | epilepsy control poor                                        | Neurological disorders |
| TJ64.00 | adverse reaction to antiparkinsonism drugs                   | Neurological disorders |
| F256.12 | west syndrome                                                | Neurological disorders |
| F256.00 | infantile spasms                                             | Neurological disorders |
| F256000 | hypsarrhythmia                                               | Neurological disorders |

|         |                                                              |                        |
|---------|--------------------------------------------------------------|------------------------|
| F256100 | salaam attacks                                               | Neurological disorders |
| F256.11 | lightning spasms                                             | Neurological disorders |
| F251500 | tonic-clonic epilepsy                                        | Neurological disorders |
| F254100 | psychomotor epilepsy                                         | Neurological disorders |
| F144000 | cerebellar ataxia due to alcoholism                          | Neurological disorders |
| F11y100 | cerebral ataxia                                              | Neurological disorders |
| A413.00 | progressive multifocal leucoencephalopathy                   | Neurological disorders |
| F113011 | low pressure hydrocephalus                                   | Neurological disorders |
| F258.00 | post-ictal state                                             | Neurological disorders |
| F24y000 | progressive supranuclear palsy                               | Neurological disorders |
| F281.11 | anoxic - ischaemic encephalopathy                            | Neurological disorders |
| F132z12 | myoclonic seizure                                            | Neurological disorders |
| SL6y.00 | antiparkinsonism drug poisoning                              | Neurological disorders |
| F250100 | pykno-epilepsy                                               | Neurological disorders |
| F14y000 | ataxia-telangiectasia                                        | Neurological disorders |
| F251.00 | generalised convulsive epilepsy                              | Neurological disorders |
| F374100 | polyneuropathy in beriberi                                   | Neurological disorders |
| 2828.00 | absence seizure                                              | Neurological disorders |
| F25F.00 | photosensitive epilepsy                                      | Neurological disorders |
| F113000 | normal pressure hydrocephalus                                | Neurological disorders |
| Q417100 | cerebellar (nontraum) and post fossa haemorrhage fet newborn | Neurological disorders |
| F14..11 | cerebellar disease                                           | Neurological disorders |
| F040100 | cerebellar intracranial abscess                              | Neurological disorders |
| C251.11 | wernicke's encephalopathy                                    | Neurological disorders |
| C250.00 | beriberi                                                     | Neurological disorders |
| F121.11 | drug induced parkinsonism                                    | Neurological disorders |
| F152111 | duchenne aran muscular atrophy                               | Neurological disorders |
| F25y500 | panayiotopoulos syndrome                                     | Neurological disorders |
| F204.00 | benign multiple sclerosis                                    | Neurological disorders |
| F250011 | epileptic absences                                           | Neurological disorders |
| A94y100 | syphilitic parkinsonism                                      | Neurological disorders |
| F13..11 | extrapyramidal disease excluding parkinson's disease         | Neurological disorders |
| F200.00 | multiple sclerosis of the brain stem                         | Neurological disorders |
| 8Cc0.00 | management of multiple sclerosis in onset phase              | Neurological disorders |
| 8Cc1.00 | management of multiple sclerosis in early disease phase      | Neurological disorders |
| 8Cc2.00 | management of multiple sclerosis in stable disability phase  | Neurological disorders |
| 8Cc4.00 | management of multiple sclerosis in palliative phase         | Neurological disorders |
| F14y100 | corticostriatal-spinal degeneration                          | Neurological disorders |
| F25y400 | benign rolandic epilepsy                                     | Neurological disorders |
| F25y200 | locl-rlt(foc)(part)idiop epilep&epilptic syn seiz locl onset | Neurological disorders |
| A940.11 | locomotor ataxia                                             | Neurological disorders |
| F254300 | limbic system epilepsy                                       | Neurological disorders |
| F142000 | marie's cerebellar ataxia                                    | Neurological disorders |
| G02..00 | rheumatic chorea                                             | Neurological disorders |
| G02..11 | sydenham's chorea                                            | Neurological disorders |
| P23..00 | congenital hydrocephalus                                     | Neurological disorders |

|         |                                                              |                        |
|---------|--------------------------------------------------------------|------------------------|
| P110z00 | unspecified spina bifida without hydrocephalus nos           | Neurological disorders |
| F250z00 | generalised nonconvulsive epilepsy nos                       | Neurological disorders |
| F12..00 | parkinson's disease                                          | Neurological disorders |
| F120.00 | paralysis agitans                                            | Neurological disorders |
| F211.00 | schilder's disease                                           | Neurological disorders |
| P233.12 | hydrocephalus with atresia of foramina of magendie+luschka   | Neurological disorders |
| Q437000 | bilirubin encephalopathy                                     | Neurological disorders |
| G672.00 | hypertensive encephalopathy                                  | Neurological disorders |
| F361.00 | peroneal muscular atrophy                                    | Neurological disorders |
| P10..00 | spina bifida with hydrocephalus                              | Neurological disorders |
| F151111 | juvenile spinal muscular atrophy                             | Neurological disorders |
| F03..13 | transverse myelitis                                          | Neurological disorders |
| C315100 | mitochond encephalopathy, lact acidosis & strokelike episode | Neurological disorders |
| 667F.00 | seizure free >12 months                                      | Neurological disorders |
| F259.00 | early infant epileptic encephalopathy wth suppression bursts | Neurological disorders |
| G020.00 | rheumatic chorea with heart involvement                      | Neurological disorders |
| F134.00 | huntington's chorea                                          | Neurological disorders |
| 9kG..00 | spec serv for pat with multiple sclerosis - enh serv admin   | Neurological disorders |
| F151.00 | spinal muscular atrophy                                      | Neurological disorders |
| Z7E4400 | cerebellar ataxia                                            | Neurological disorders |
| Z7E4.00 | ataxia                                                       | Neurological disorders |
| Z7E4300 | truncal ataxia                                               | Neurological disorders |
| ZS42400 | cerebellar dysarthria                                        | Neurological disorders |
| ZS82.00 | acquired epileptic aphasia                                   | Neurological disorders |
| ZS42111 | pseudobulbar palsy type of dysarthria                        | Neurological disorders |
| ZS42113 | suprabulbar palsy type of dysarthria                         | Neurological disorders |
| F241.00 | paraplegia                                                   | Paralysis or paresis   |
| F36y000 | supranuclear paralysis                                       | Paralysis or paresis   |
| F232.11 | tetraplegia - congenital                                     | Paralysis or paresis   |
| F137000 | athetoid cerebral palsy                                      | Paralysis or paresis   |
| Q206111 | erb-duchenne paralysis                                       | Paralysis or paresis   |
| Q206112 | erb's palsy                                                  | Paralysis or paresis   |
| F221.00 | spastic hemiplegia                                           | Paralysis or paresis   |
| F243.00 | monoplegia of lower limb                                     | Paralysis or paresis   |
| F220.00 | flaccid hemiplegia                                           | Paralysis or paresis   |
| 7L0D115 | sever operation for erb's palsy                              | Paralysis or paresis   |
| E201400 | hysterical paralysis                                         | Paralysis or paresis   |
| 2949.00 | lower limb spasticity                                        | Paralysis or paresis   |
| 294A.00 | upper limb spasticity                                        | Paralysis or paresis   |
| 294B.00 | worsening limb spasticity                                    | Paralysis or paresis   |
| 294E.00 | upper limb flaccidity                                        | Paralysis or paresis   |
| 7L0D114 | l'episcopo operation for obstetric palsy                     | Paralysis or paresis   |
| F230111 | spastic diplegic cerebral palsy                              | Paralysis or paresis   |
| F2B0.00 | spastic quadriplegic cerebral palsy                          | Paralysis or paresis   |
| F2By.00 | other cerebral palsy                                         | Paralysis or paresis   |
| F2Bz.00 | cerebral palsy nos                                           | Paralysis or paresis   |

|         |                                                             |                      |
|---------|-------------------------------------------------------------|----------------------|
| 38Gw.00 | gross motor function classification system cerebral palsy   | Paralysis or paresis |
| F240.00 | quadriplegia                                                | Paralysis or paresis |
| F240.11 | tetraplegia                                                 | Paralysis or paresis |
| E260000 | psychogenic paralysis                                       | Paralysis or paresis |
| F2B..00 | cerebral palsy                                              | Paralysis or paresis |
| F2B1.00 | spastic hemiplegic cerebral palsy                           | Paralysis or paresis |
| F230.11 | paraplegia - congenital                                     | Paralysis or paresis |
| F23y600 | choreoathetoid cerebral palsy                               | Paralysis or paresis |
| F23y400 | ataxic diplegic cerebral palsy                              | Paralysis or paresis |
| SN48111 | paralysis following electric shock                          | Paralysis or paresis |
| 1B33.00 | paralysis present                                           | Paralysis or paresis |
| 283..00 | o/e - paralysis                                             | Paralysis or paresis |
| 2833.00 | o/e - hemiplegia                                            | Paralysis or paresis |
| 2834.00 | o/e - monoplegia                                            | Paralysis or paresis |
| 2835.00 | o/e - paraplegia                                            | Paralysis or paresis |
| 2836.00 | o/e - quadriplegia                                          | Paralysis or paresis |
| 2837.00 | o/e - diplegia                                              | Paralysis or paresis |
| 283Z.00 | o/e - paralysis nos                                         | Paralysis or paresis |
| 2992.00 | o/e - gait spastic                                          | Paralysis or paresis |
| 2992.11 | o/e - spastic gait                                          | Paralysis or paresis |
| 8E53.00 | exercises for paralysis                                     | Paralysis or paresis |
| 8E54.00 | exercises for spasticity                                    | Paralysis or paresis |
| F22z.00 | hemiplegia nos                                              | Paralysis or paresis |
| F230000 | congenital paraplegia                                       | Paralysis or paresis |
| F230z00 | congenital diplegia nos                                     | Paralysis or paresis |
| F234.00 | infantile hemiplegia nos                                    | Paralysis or paresis |
| F23y000 | ataxic infantile cerebral palsy                             | Paralysis or paresis |
| F23yz00 | other infantile cerebral palsy nos                          | Paralysis or paresis |
| F23z.00 | congenital cerebral palsy nos                               | Paralysis or paresis |
| F240000 | flaccid tetraplegia                                         | Paralysis or paresis |
| F240100 | spastic tetraplegia                                         | Paralysis or paresis |
| F241000 | flaccid paraplegia                                          | Paralysis or paresis |
| F241100 | spastic paraplegia                                          | Paralysis or paresis |
| F245.00 | monoplegia unspecified                                      | Paralysis or paresis |
| F246.00 | cauda equina syndrome                                       | Paralysis or paresis |
| F246000 | cauda equina syndrome not affecting bladder                 | Paralysis or paresis |
| F246z00 | cauda equina syndrome nos                                   | Paralysis or paresis |
| F24z.00 | paralysis nos                                               | Paralysis or paresis |
| Fyu9.00 | [x]cerebral palsy and other paralytic syndromes             | Paralysis or paresis |
| Fyu9000 | [x]other infantile cerebral palsy                           | Paralysis or paresis |
| N12C300 | lumbar disc prolapse with cauda equina compression          | Paralysis or paresis |
| Q206.00 | brachial plexus palsy due to birth trauma                   | Paralysis or paresis |
| Q206000 | brachial palsy unspecified, due to birth trauma             | Paralysis or paresis |
| Q206y00 | other specified brachial plexus palsy due to birth trauma   | Paralysis or paresis |
| Q206z00 | brachial plexus palsy due to birth trauma nos               | Paralysis or paresis |
| Q207.00 | other cranial or peripheral nerve palsy due to birth trauma | Paralysis or paresis |

|         |                                                           |                      |
|---------|-----------------------------------------------------------|----------------------|
| Q207z00 | cranial or peripheral nerve palsy due to birth trauma nos | Paralysis or paresis |
| R012200 | [d]spastic gait                                           | Paralysis or paresis |
| R014.00 | [d]transient paralysis of a limb                          | Paralysis or paresis |
| R014000 | [d]transient monoplegia nos                               | Paralysis or paresis |
| S114500 | closed spinal fracture with cauda equina lesion           | Paralysis or paresis |
| S124000 | closed injury cauda equina                                | Paralysis or paresis |
| F23..12 | infantile cerebral palsy                                  | Paralysis or paresis |
| F23y200 | spastic cerebral palsy                                    | Paralysis or paresis |
| F233.11 | congenital spastic foot                                   | Paralysis or paresis |
| F23y300 | dyskinetic cerebral palsy                                 | Paralysis or paresis |
| 7L0D111 | correction of erb's palsy                                 | Paralysis or paresis |
| F393.11 | familial hypokalaemic periodic paralysis                  | Paralysis or paresis |
| SN48112 | paralysis following electric shock                        | Paralysis or paresis |
| 7L0D100 | correction of obstetric palsy                             | Paralysis or paresis |
| F246100 | cauda equina syndrome with cord bladder                   | Paralysis or paresis |
| F393.00 | familial periodic paralysis                               | Paralysis or paresis |
| F23..00 | congenital cerebral palsy                                 | Paralysis or paresis |
| F23..11 | congenital spastic cerebral palsy                         | Paralysis or paresis |
| F232.00 | congenital quadriplegia                                   | Paralysis or paresis |
| F230.00 | congenital diplegia                                       | Paralysis or paresis |
| F223.00 | right hemiplegia                                          | Paralysis or paresis |
| F222.00 | left hemiplegia                                           | Paralysis or paresis |
| F221.11 | spastic foot                                              | Paralysis or paresis |
| F24yz11 | specified palsy nec                                       | Paralysis or paresis |
| G669.00 | cerebral palsy, not congenital or infantile, acute        | Paralysis or paresis |
| F038.00 | tropical spastic paraplegia                               | Paralysis or paresis |
| A941.11 | general paralysis of insane                               | Paralysis or paresis |
| F137.11 | athetoid cerebral palsy                                   | Paralysis or paresis |
| F233.00 | congenital monoplegia                                     | Paralysis or paresis |
| S124.00 | cauda equina injury without bony injury                   | Paralysis or paresis |
| F230100 | cerebral palsy with spastic diplegia                      | Paralysis or paresis |
| F141.00 | hereditary spastic paraplegia                             | Paralysis or paresis |
| F244.00 | monoplegia of upper limb                                  | Paralysis or paresis |
| N231011 | massive muscular calcification associated with paraplegia | Paralysis or paresis |
| F231.00 | congenital hemiplegia                                     | Paralysis or paresis |
| F23y100 | flaccid infantile cerebral palsy                          | Paralysis or paresis |
| F22..00 | hemiplegia                                                | Paralysis or paresis |
| F343000 | acute radial nerve palsy                                  | Paralysis or paresis |
| F242.00 | diplegia of upper limbs                                   | Paralysis or paresis |
| F152200 | progressive bulbar palsy                                  | Paralysis or paresis |
| F342100 | tardy ulnar nerve palsy                                   | Paralysis or paresis |
| 344 SH  | spastic hemiplegia                                        | Paralysis or paresis |
| 2833    | o/e - hemiplegia                                          | Paralysis or paresis |
| 344 G   | paraplegia                                                | Paralysis or paresis |
| 2835    | o/e - paraplegia                                          | Paralysis or paresis |
| 343 PR  | spastic paraplegia                                        | Paralysis or paresis |

|         |                                                             |              |
|---------|-------------------------------------------------------------|--------------|
| J120200 | acute duodenal ulcer with perforation                       | Peptic ulcer |
| J140200 | acute gastrojejunal ulcer with perforation                  | Peptic ulcer |
| 7627100 | suture of duodenal ulcer not elsewhere classified           | Peptic ulcer |
| J13..11 | stress ulcer nos                                            | Peptic ulcer |
| J111111 | bleeding chronic gastric ulcer                              | Peptic ulcer |
| J121111 | bleeding chronic duodenal ulcer                             | Peptic ulcer |
| J110111 | bleeding acute gastric ulcer                                | Peptic ulcer |
| J130200 | acute peptic ulcer with perforation                         | Peptic ulcer |
| J113.00 | non steroidal anti inflammatory drug induced gastric ulcer  | Peptic ulcer |
| J126.00 | non steroidal anti inflammatory drug induced duodenal ulcer | Peptic ulcer |
| J110.00 | acute gastric ulcer                                         | Peptic ulcer |
| J111.00 | chronic gastric ulcer                                       | Peptic ulcer |
| J121.00 | chronic duodenal ulcer                                      | Peptic ulcer |
| J131.00 | chronic peptic ulcer                                        | Peptic ulcer |
| J141.00 | chronic gastrojejunal ulcer                                 | Peptic ulcer |
| J11..00 | gastric ulcer - (gu)                                        | Peptic ulcer |
| J14..00 | gastrojejunal ulcer (gju)                                   | Peptic ulcer |
| 1956    | peptic ulcer symptoms                                       | Peptic ulcer |
| J112.00 | anti-platelet induced gastric ulcer                         | Peptic ulcer |
| J125.00 | anti-platelet induced duodenal ulcer                        | Peptic ulcer |
| 7612500 | resection of gastric ulcer by cautery                       | Peptic ulcer |
| 761J.11 | stomach ulcer operations                                    | Peptic ulcer |
| 761J.00 | operations on gastric ulcer                                 | Peptic ulcer |
| 761J000 | closure of perforated gastric ulcer                         | Peptic ulcer |
| 761Jy00 | other specified operation on gastric ulcer                  | Peptic ulcer |
| 761Jz00 | operation on gastric ulcer nos                              | Peptic ulcer |
| 7627.00 | operations on duodenal ulcer                                | Peptic ulcer |
| 7627000 | closure of perforated duodenal ulcer                        | Peptic ulcer |
| 7627y00 | other specified operation on duodenal ulcer                 | Peptic ulcer |
| 7627z00 | operation on duodenal ulcer nos                             | Peptic ulcer |
| J14..15 | stomal ulcer                                                | Peptic ulcer |
| J110000 | acute gastric ulcer without mention of complication         | Peptic ulcer |
| J110400 | acute gastric ulcer with obstruction                        | Peptic ulcer |
| J110y00 | acute gastric ulcer unspecified                             | Peptic ulcer |
| J110z00 | acute gastric ulcer nos                                     | Peptic ulcer |
| J111000 | chronic gastric ulcer without mention of complication       | Peptic ulcer |
| J111400 | chronic gastric ulcer with obstruction                      | Peptic ulcer |
| J111y00 | chronic gastric ulcer unspecified                           | Peptic ulcer |
| J111z00 | chronic gastric ulcer nos                                   | Peptic ulcer |
| J11y.00 | unspecified gastric ulcer                                   | Peptic ulcer |
| J11y000 | unspecified gastric ulcer without mention of complication   | Peptic ulcer |
| J11y100 | unspecified gastric ulcer with haemorrhage                  | Peptic ulcer |
| J11y200 | unspecified gastric ulcer with perforation                  | Peptic ulcer |
| J11y300 | unspecified gastric ulcer with haemorrhage and perforation  | Peptic ulcer |
| J11y400 | unspecified gastric ulcer with obstruction                  | Peptic ulcer |
| J11yz00 | unspecified gastric ulcer nos                               | Peptic ulcer |

|         |                                                             |              |
|---------|-------------------------------------------------------------|--------------|
| J120.00 | acute duodenal ulcer                                        | Peptic ulcer |
| J120000 | acute duodenal ulcer without mention of complication        | Peptic ulcer |
| J120400 | acute duodenal ulcer with obstruction                       | Peptic ulcer |
| J120y00 | acute duodenal ulcer unspecified                            | Peptic ulcer |
| J120z00 | acute duodenal ulcer nos                                    | Peptic ulcer |
| J121000 | chronic duodenal ulcer without mention of complication      | Peptic ulcer |
| J121400 | chronic duodenal ulcer with obstruction                     | Peptic ulcer |
| J121y00 | chronic duodenal ulcer unspecified                          | Peptic ulcer |
| J121z00 | chronic duodenal ulcer nos                                  | Peptic ulcer |
| J124.00 | recurrent duodenal ulcer                                    | Peptic ulcer |
| J12y.00 | unspecified duodenal ulcer                                  | Peptic ulcer |
| J12y000 | unspecified duodenal ulcer without mention of complication  | Peptic ulcer |
| J12y100 | unspecified duodenal ulcer with haemorrhage                 | Peptic ulcer |
| J12y200 | unspecified duodenal ulcer with perforation                 | Peptic ulcer |
| J12y300 | unspecified duodenal ulcer with haemorrhage and perforation | Peptic ulcer |
| J12y400 | unspecified duodenal ulcer with obstruction                 | Peptic ulcer |
| J12yz00 | unspecified duodenal ulcer nos                              | Peptic ulcer |
| J12z.00 | duodenal ulcer nos                                          | Peptic ulcer |
| J130.00 | acute peptic ulcer                                          | Peptic ulcer |
| J130000 | acute peptic ulcer without mention of complication          | Peptic ulcer |
| J130400 | acute peptic ulcer with obstruction                         | Peptic ulcer |
| J130y00 | acute peptic ulcer unspecified                              | Peptic ulcer |
| J130z00 | acute peptic ulcer nos                                      | Peptic ulcer |
| J131000 | chronic peptic ulcer without mention of complication        | Peptic ulcer |
| J131400 | chronic peptic ulcer with obstruction                       | Peptic ulcer |
| J131y00 | chronic peptic ulcer unspecified                            | Peptic ulcer |
| J131z00 | chronic peptic ulcer nos                                    | Peptic ulcer |
| J13y.00 | unspecified peptic ulcer                                    | Peptic ulcer |
| J13y000 | unspecified peptic ulcer without mention of complication    | Peptic ulcer |
| J13y100 | unspecified peptic ulcer with haemorrhage                   | Peptic ulcer |
| J13y200 | unspecified peptic ulcer with perforation                   | Peptic ulcer |
| J13y300 | unspecified peptic ulcer with haemorrhage and perforation   | Peptic ulcer |
| J13y400 | unspecified peptic ulcer with obstruction                   | Peptic ulcer |
| J13yz00 | unspecified peptic ulcer nos                                | Peptic ulcer |
| J13z.00 | peptic ulcer nos                                            | Peptic ulcer |
| J140.00 | acute gastrojejunal ulcer                                   | Peptic ulcer |
| J140000 | acute gastrojejunal ulcer without mention of complication   | Peptic ulcer |
| J140400 | acute gastrojejunal ulcer with obstruction                  | Peptic ulcer |
| J140y00 | acute gastrojejunal ulcer unspecified                       | Peptic ulcer |
| J140z00 | acute gastrojejunal ulcer nos                               | Peptic ulcer |
| J141000 | chronic gastrojejunal ulcer without mention of complication | Peptic ulcer |
| J141400 | chronic gastrojejunal ulcer with obstruction                | Peptic ulcer |
| J141y00 | chronic gastrojejunal ulcer unspecified                     | Peptic ulcer |
| J141z00 | chronic gastrojejunal ulcer nos                             | Peptic ulcer |
| J14y.00 | unspecified gastrojejunal ulcer                             | Peptic ulcer |
| J14y100 | unspecified gastrojejunal ulcer with haemorrhage            | Peptic ulcer |



|         |                                                              |              |
|---------|--------------------------------------------------------------|--------------|
| J14y200 | unspecified gastrojejunal ulcer with perforation             | Peptic ulcer |
| J14y400 | unspecified gastrojejunal ulcer with obstruction             | Peptic ulcer |
| J14yz00 | unspecified gastrojejunal ulcer nos                          | Peptic ulcer |
| J14z.00 | gastrojejunal ulcer nos                                      | Peptic ulcer |
| J17y800 | healed gastric ulcer leaving a scar                          | Peptic ulcer |
| J112z00 | anti-platelet induced gastric ulcer nos                      | Peptic ulcer |
| J110200 | acute gastric ulcer with perforation                         | Peptic ulcer |
| ZV12712 | [v]personal history of duodenal ulcer                        | Peptic ulcer |
| ZV12711 | [v]personal history of peptic ulcer                          | Peptic ulcer |
| J11z.11 | gastric erosions                                             | Peptic ulcer |
| J123.00 | duodenal erosion                                             | Peptic ulcer |
| J130300 | acute peptic ulcer with haemorrhage and perforation          | Peptic ulcer |
| 7627200 | oversew of blood vessel of duodenal ulcer                    | Peptic ulcer |
| J11..11 | prepyloric ulcer                                             | Peptic ulcer |
| 761J100 | closure of gastric ulcer nec                                 | Peptic ulcer |
| J11z.00 | gastric ulcer nos                                            | Peptic ulcer |
| J13..00 | peptic ulcer - (pu) site unspecified                         | Peptic ulcer |
| 14C1.00 | h/o: peptic ulcer                                            | Peptic ulcer |
| J14..12 | gastrocolic ulcer                                            | Peptic ulcer |
| 761J111 | suture of ulcer of stomach nec                               | Peptic ulcer |
| 14C1.11 | h/o: duodenal ulcer                                          | Peptic ulcer |
| 14C1.12 | h/o: gastric ulcer                                           | Peptic ulcer |
| ZV12C00 | [v] personal history of gastric ulcer                        | Peptic ulcer |
| J11z.12 | multiple gastric ulcers                                      | Peptic ulcer |
| 761D500 | endoscopic injection haemostasis of duodenal ulcer           | Peptic ulcer |
| 761D600 | endoscopic injection haemostasis of gastric ulcer            | Peptic ulcer |
| J130100 | acute peptic ulcer with haemorrhage                          | Peptic ulcer |
| J120100 | acute duodenal ulcer with haemorrhage                        | Peptic ulcer |
| J111211 | perforated chronic gastric ulcer                             | Peptic ulcer |
| J121300 | chronic duodenal ulcer with haemorrhage and perforation      | Peptic ulcer |
| J141300 | chronic gastrojejunal ulcer with haemorrhage and perforation | Peptic ulcer |
| J110300 | acute gastric ulcer with haemorrhage and perforation         | Peptic ulcer |
| J131100 | chronic peptic ulcer with haemorrhage                        | Peptic ulcer |
| J121211 | perforated chronic duodenal ulcer                            | Peptic ulcer |
| J111100 | chronic gastric ulcer with haemorrhage                       | Peptic ulcer |
| J102000 | peptic ulcer of oesophagus                                   | Peptic ulcer |
| J131300 | chronic peptic ulcer with haemorrhage and perforation        | Peptic ulcer |
| J141100 | chronic gastrojejunal ulcer with haemorrhage                 | Peptic ulcer |
| J140100 | acute gastrojejunal ulcer with haemorrhage                   | Peptic ulcer |
| 7612111 | balfour excision of gastric ulcer                            | Peptic ulcer |
| J140300 | acute gastrojejunal ulcer with haemorrhage and perforation   | Peptic ulcer |
| J120300 | acute duodenal ulcer with haemorrhage and perforation        | Peptic ulcer |
| J121100 | chronic duodenal ulcer with haemorrhage                      | Peptic ulcer |
| J110100 | acute gastric ulcer with haemorrhage                         | Peptic ulcer |
| J111200 | chronic gastric ulcer with perforation                       | Peptic ulcer |
| J111300 | chronic gastric ulcer with haemorrhage and perforation       | Peptic ulcer |

|         |                                                              |                             |
|---------|--------------------------------------------------------------|-----------------------------|
| J141200 | chronic gastrojejunal ulcer with perforation                 | Peptic ulcer                |
| J12..00 | duodenal ulcer - (du)                                        | Peptic ulcer                |
| J11..12 | pyloric ulcer                                                | Peptic ulcer                |
| J131200 | chronic peptic ulcer with perforation                        | Peptic ulcer                |
| J14y000 | unspecified gastrojejunal ulcer without mention complication | Peptic ulcer                |
| J12yy00 | unspec duodenal ulcer; unspec haemorrhage and/or perforation | Peptic ulcer                |
| J11yy00 | unspec gastric ulcer; unspec haemorrhage and/or perforation  | Peptic ulcer                |
| J14y300 | unspec gastrojejunal ulcer with haemorrhage and perforation  | Peptic ulcer                |
| J14yy00 | unspec gastrojejunal ulcer; unspec haemorrhage/perforation   | Peptic ulcer                |
| J13yy00 | unspec peptic ulcer; unspec haemorrhage and/or perforation   | Peptic ulcer                |
| J121200 | chronic duodenal ulcer with perforation                      | Peptic ulcer                |
| J122.00 | duodenal ulcer disease                                       | Peptic ulcer                |
| J14..13 | jejunal ulcer                                                | Peptic ulcer                |
| 7627    | operations on duodenal ulcer                                 | Peptic ulcer                |
| G72y100 | aneurysm of external carotid artery                          | Peripheral vascular disease |
| G73z000 | intermittent claudication                                    | Peripheral vascular disease |
| G72y800 | aneurysm of superior mesenteric artery                       | Peripheral vascular disease |
| G71..00 | aortic aneurysm                                              | Peripheral vascular disease |
| G72y500 | aneurysm of splenic artery                                   | Peripheral vascular disease |
| G713.00 | abdominal aortic aneurysm which has ruptured                 | Peripheral vascular disease |
| G673.00 | cerebral aneurysm, nonruptured                               | Peripheral vascular disease |
| G701.00 | renal artery atherosclerosis                                 | Peripheral vascular disease |
| 7A28200 | percutaneous transluminal angioplasty of vertebral artery    | Peripheral vascular disease |
| G712.00 | thoracic aortic aneurysm without mention of rupture          | Peripheral vascular disease |
| 7A23800 | percutaneous coil embolisation of cerebral artery aneurysm   | Peripheral vascular disease |
| G723000 | aneurysm of femoral artery                                   | Peripheral vascular disease |
| 7A1B000 | endovascular stenting infrarenal abdominal aortic aneurysm   | Peripheral vascular disease |
| 7A58000 | percutaneous transluminal coil embolisation aneurysm small   | Peripheral vascular disease |
| 7A58100 | percutaneous transluminal coil embolisation aneurysm medium  | Peripheral vascular disease |
| 7A58300 | percutaneous transluminal coil embolisation aneurysm giant   | Peripheral vascular disease |
| 7A59200 | perc translum balloon assist coil embolisat single aneurysm  | Peripheral vascular disease |
| 7A59z00 | transluminal balloon assisted coil embolisation aneurysm nos | Peripheral vascular disease |
| 7A5A000 | perc translumin stent assis coil embolis three more aneurysm | Peripheral vascular disease |
| 7A5A200 | perc trans stent assisted coil embolisation single aneurysm  | Peripheral vascular disease |
| 7A5Az00 | transluminal stent assisted coil embolisation aneurysm nos   | Peripheral vascular disease |
| 7A5B000 | percutaneous translumin liquid polymer embolisation aneurysm | Peripheral vascular disease |
| 7A1C.00 | translum insert stent graft for aneurysmal segment of aorta  | Peripheral vascular disease |
| 7A1C000 | endovas ins stent graft for infrarenal abdom aortic aneurysm | Peripheral vascular disease |
| 7A1C100 | endovas insert of stent graft for suprarenal aortic aneurysm | Peripheral vascular disease |
| 7A1C200 | endov insertion of stent graft for thoracic aortic aneurysm  | Peripheral vascular disease |
| 7A1C300 | endov ins stent graft for aortic dissection in any position  | Peripheral vascular disease |
| 7A1C500 | endovas insertion of stent graft for aorto-uniliac aneurysm  | Peripheral vascular disease |
| 7A1Cy00 | os translum ins stent graft for aneurysmal segment of aorta  | Peripheral vascular disease |
| 7A1Cz00 | translum ins stent graft for aneurysmal segment of aorta nos | Peripheral vascular disease |
| 7A1B800 | endovascul insert stent infrarenal abdominal aortic aneurysm | Peripheral vascular disease |
| 7A1B900 | endovascular insertion stent for suprarenal aortic aneurysm  | Peripheral vascular disease |

|         |                                                              |                             |
|---------|--------------------------------------------------------------|-----------------------------|
| 7A1BB00 | endovascular ins stent for aortic dissection in any position | Peripheral vascular disease |
| 7A1BC00 | endovas insert stent for aortic aneurysm of bifurcation nec  | Peripheral vascular disease |
| G73z012 | vascular claudication                                        | Peripheral vascular disease |
| 7A46.11 | other replacement aneurysmal femoral artery by anastomosis   | Peripheral vascular disease |
| 7A14400 | replace aneurysm abdominal aorta by anast aorta to aorta nec | Peripheral vascular disease |
| 7A14000 | replace aneurysm ascend aorta by anast of aorta/aorta nec    | Peripheral vascular disease |
| 7A11100 | replace aneurysm bifurc aorta by anast aorta to femoral art  | Peripheral vascular disease |
| 7A11300 | replace aneurysm bifurc aorta by anast aorta to iliac artery | Peripheral vascular disease |
| 7A46z00 | other replacement of aneurysmal femoral/popliteal artery nos | Peripheral vascular disease |
| 7A46000 | replace aneurysm fem art by fem/pop art anastom c prosth nec | Peripheral vascular disease |
| 7A46C00 | replace aneurysm fem artery by fem/fem art anastomosis nec   | Peripheral vascular disease |
| 7A40A00 | replace aneurysm iliac art by aorta/ext iliac art anast nec  | Peripheral vascular disease |
| 7A46300 | replace aneurysm pop art by pop/pop a anast c vein graft nec | Peripheral vascular disease |
| 7A46y00 | other replacement of aneurysmal femoral/popliteal artery os  | Peripheral vascular disease |
| 7A46100 | replace aneurysm pop art by pop/pop art anastom c prosth nec | Peripheral vascular disease |
| 7A46D00 | replace aneurysm popliteal artery by pop/fem anastomosis nec | Peripheral vascular disease |
| 7A14100 | replace aneurysm thoracic aorta by anast of aorta/aorta nec  | Peripheral vascular disease |
| 7A11.00 | replacement of aneurysmal bifurcation of aorta               | Peripheral vascular disease |
| 7A11y00 | replacement of aneurysmal bifurcation of aorta os            | Peripheral vascular disease |
| 7A14y00 | other replacement of aneurysmal segment of aorta os          | Peripheral vascular disease |
| G714200 | infrarenal abdominal aortic aneurysm                         | Peripheral vascular disease |
| 7A10400 | bypass aorta anastomosis axillary artery bi femoral arteries | Peripheral vascular disease |
| 66f3.00 | aortic aneurysm monitoring                                   | Peripheral vascular disease |
| G726.00 | dissection of renal artery                                   | Peripheral vascular disease |
| G728.00 | dissection of artery of lower extremity                      | Peripheral vascular disease |
| G72A.00 | dissection of other specified arteries                       | Peripheral vascular disease |
| G72B.00 | dissection of artery                                         | Peripheral vascular disease |
| G734.00 | peripheral arterial disease                                  | Peripheral vascular disease |
| G72y700 | aneurysm of coeliac artery                                   | Peripheral vascular disease |
| 585I000 | abdominal aortic aneurysm screen ultrasound scan abnormal    | Peripheral vascular disease |
| 662U.00 | peripheral vascular disease monitoring                       | Peripheral vascular disease |
| G723600 | post radiological femoral false aneurysm                     | Peripheral vascular disease |
| G727.00 | dissection of iliac artery                                   | Peripheral vascular disease |
| G700.00 | aortic atherosclerosis                                       | Peripheral vascular disease |
| 9m11.00 | peripheral vascular disease monitoring second letter         | Peripheral vascular disease |
| 9m12.00 | peripheral vascular disease monitoring third letter          | Peripheral vascular disease |
| G722.00 | aneurysm of iliac artery                                     | Peripheral vascular disease |
| 7A35300 | percutaneous transluminal angioplasty suprarenal artery nec  | Peripheral vascular disease |
| P766.00 | peripheral arterio-venous aneurysm                           | Peripheral vascular disease |
| G73z.00 | peripheral vascular disease nos                              | Peripheral vascular disease |
| 7A35200 | percutaneous transluminal angioplasty inf mesenteric art nec | Peripheral vascular disease |
| 7A28100 | percutaneous transluminal angioplasty of brachial artery     | Peripheral vascular disease |
| 7A4B100 | percutaneous transluminal angioplasty of popliteal artery    | Peripheral vascular disease |
| 7A28000 | percutaneous transluminal angioplasty of subclavian artery   | Peripheral vascular disease |
| 7A35100 | percutaneous transluminal angioplasty sup mesenteric art nec | Peripheral vascular disease |
| G713.11 | ruptured abdominal aortic aneurysm                           | Peripheral vascular disease |

|         |                                                             |                             |
|---------|-------------------------------------------------------------|-----------------------------|
| 14AE.00 | h/o: aortic aneurysm                                        | Peripheral vascular disease |
| G710.00 | dissecting aortic aneurysm                                  | Peripheral vascular disease |
| 9N4h.00 | dna - did not attend peripheral vascular disease clinic     | Peripheral vascular disease |
| 2456.00 | o/e - arterial wall - aneurysm                              | Peripheral vascular disease |
| 2I16.00 | o/e - gangrene                                              | Peripheral vascular disease |
| G714300 | aneurysm of suprarenal aorta                                | Peripheral vascular disease |
| 7A10300 | axillo-unifemoral ptfe bypass graft                         | Peripheral vascular disease |
| 7A11z00 | replacement of aneurysmal bifurcation of aorta nos          | Peripheral vascular disease |
| 7A12.00 | other bypass of bifurcation of aorta                        | Peripheral vascular disease |
| 7A12y00 | other specified other bypass of bifurcation of aorta        | Peripheral vascular disease |
| 7A12z00 | other bypass of bifurcation of aorta nos                    | Peripheral vascular disease |
| 7A13.00 | emergency replacement of aneurysmal segment of aorta        | Peripheral vascular disease |
| 7A13.11 | emergency repair of aortic aneurysm                         | Peripheral vascular disease |
| 7A13z00 | emergency replacement of aneurysmal segment of aorta nos    | Peripheral vascular disease |
| 7A14z00 | other replacement of aneurysmal segment of aorta nos        | Peripheral vascular disease |
| 7A15.00 | other emergency bypass of segment of aorta                  | Peripheral vascular disease |
| 7A15y00 | other specified other emergency bypass of segment of aorta  | Peripheral vascular disease |
| 7A15z00 | other emergency bypass of segment of aorta nos              | Peripheral vascular disease |
| 7A16.00 | other bypass of segment of aorta                            | Peripheral vascular disease |
| 7A16y00 | other specified other bypass of segment of aorta            | Peripheral vascular disease |
| 7A16z00 | other bypass of segment of aorta nos                        | Peripheral vascular disease |
| 7A17100 | revision of prosthesis of bifurcation of aorta              | Peripheral vascular disease |
| 7A19200 | open embolectomy of bifurcation of aorta                    | Peripheral vascular disease |
| 7A19400 | operation on aneurysm of aorta nec                          | Peripheral vascular disease |
| 7A1A100 | percutaneous transluminal angioplasty of aorta nec          | Peripheral vascular disease |
| 7A21400 | operation on aneurysm of carotid artery                     | Peripheral vascular disease |
| 7A22000 | percutaneous transluminal angioplasty of carotid artery     | Peripheral vascular disease |
| 7A26D00 | reconstruction of subclavian artery with vein graft         | Peripheral vascular disease |
| 7A26F00 | reconstruction of brachial artery with vein graft           | Peripheral vascular disease |
| 7A27C00 | operation on aneurysm of subclavian artery                  | Peripheral vascular disease |
| 7A27D00 | operation on aneurysm of axillary artery                    | Peripheral vascular disease |
| 7A27E00 | operation on aneurysm of brachial artery                    | Peripheral vascular disease |
| 7A28C00 | percutaneous transluminal angioplasty of axillary artery    | Peripheral vascular disease |
| 7A31300 | operation on aneurysm of renal artery                       | Peripheral vascular disease |
| 7A34D00 | operation on aneurysm of superior mesenteric artery nec     | Peripheral vascular disease |
| 7A34E00 | operation on aneurysm of inferior mesenteric artery nec     | Peripheral vascular disease |
| 7A34F00 | operation on aneurysm of suprarenal artery nec              | Peripheral vascular disease |
| 7A35000 | percutaneous transluminal angioplasty of coeliac artery nec | Peripheral vascular disease |
| 7A40y00 | other specified replacement of aneurysmal iliac artery      | Peripheral vascular disease |
| 7A40z00 | replacement of aneurysmal iliac artery nos                  | Peripheral vascular disease |
| 7A41y00 | other specified other bypass of iliac artery                | Peripheral vascular disease |
| 7A41z00 | other bypass of iliac artery nos                            | Peripheral vascular disease |
| 7A43200 | operation on aneurysm of iliac artery nec                   | Peripheral vascular disease |
| 7A44000 | percutaneous transluminal angioplasty of iliac artery       | Peripheral vascular disease |
| 7A48z00 | other bypass of femoral artery or popliteal artery nos      | Peripheral vascular disease |
| 7A49800 | reconstruction of femoral artery with vein graft            | Peripheral vascular disease |

|         |                                                              |                             |
|---------|--------------------------------------------------------------|-----------------------------|
| 7A49900 | reconstruction of popliteal artery with vein graft           | Peripheral vascular disease |
| 7A4A400 | ligation of aneurysm of popliteal artery                     | Peripheral vascular disease |
| 7A4A500 | operation on aneurysm of femoral artery nec                  | Peripheral vascular disease |
| 7A4B000 | percutaneous transluminal angioplasty of femoral artery      | Peripheral vascular disease |
| 7A52300 | repair of artery using vein graft nec                        | Peripheral vascular disease |
| 7A53400 | operation on aneurysm of artery nec                          | Peripheral vascular disease |
| 7A54000 | percutaneous transluminal angioplasty of artery nec          | Peripheral vascular disease |
| P72z100 | congenital aneurysm of aorta                                 | Peripheral vascular disease |
| G341z00 | aneurysm of heart nos                                        | Peripheral vascular disease |
| G421.00 | aneurysm of pulmonary artery                                 | Peripheral vascular disease |
| G702.00 | extremity artery atheroma                                    | Peripheral vascular disease |
| G702z00 | extremity artery atheroma nos                                | Peripheral vascular disease |
| G70z.00 | arteriosclerotic vascular disease nos                        | Peripheral vascular disease |
| G711.00 | thoracic aortic aneurysm which has ruptured                  | Peripheral vascular disease |
| G711.11 | ruptured thoracic aortic aneurysm                            | Peripheral vascular disease |
| G714.00 | abdominal aortic aneurysm without mention of rupture         | Peripheral vascular disease |
| G714.11 | aaa - abdominal aortic aneurysm without mention of rupture   | Peripheral vascular disease |
| G715.00 | ruptured aortic aneurysm nos                                 | Peripheral vascular disease |
| G715000 | thoracoabdominal aortic aneurysm, ruptured                   | Peripheral vascular disease |
| G716.00 | aortic aneurysm without mention of rupture nos               | Peripheral vascular disease |
| G716000 | thoracoabdominal aortic aneurysm, without mention of rupture | Peripheral vascular disease |
| G718.00 | leaking abdominal aortic aneurysm                            | Peripheral vascular disease |
| G71z.00 | aortic aneurysm nos                                          | Peripheral vascular disease |
| G72..00 | other aneurysm                                               | Peripheral vascular disease |
| G720000 | aneurysm of brachial artery                                  | Peripheral vascular disease |
| G720100 | aneurysm of radial artery                                    | Peripheral vascular disease |
| G720200 | aneurysm of ulnar artery                                     | Peripheral vascular disease |
| G720z00 | aneurysm of arm artery nos                                   | Peripheral vascular disease |
| G722000 | aneurysm of common iliac artery                              | Peripheral vascular disease |
| G722100 | aneurysm of external iliac artery                            | Peripheral vascular disease |
| G722200 | aneurysm of internal iliac artery                            | Peripheral vascular disease |
| G722z00 | aneurysm of iliac artery nos                                 | Peripheral vascular disease |
| G723200 | aneurysm of anterior tibial artery                           | Peripheral vascular disease |
| G723300 | aneurysm of dorsalis pedis artery                            | Peripheral vascular disease |
| G723400 | aneurysm of posterior tibial artery                          | Peripheral vascular disease |
| G723z00 | aneurysm of leg artery nos                                   | Peripheral vascular disease |
| G72y.00 | aneurysm of other artery                                     | Peripheral vascular disease |
| G72y300 | aneurysm of neck artery nos                                  | Peripheral vascular disease |
| G72y900 | aneurysm of inferior mesenteric artery                       | Peripheral vascular disease |
| G72yB00 | aneurysm of other visceral artery                            | Peripheral vascular disease |
| G72yz00 | other aneurysm nos                                           | Peripheral vascular disease |
| G72z.00 | aneurysm nos                                                 | Peripheral vascular disease |
| G731100 | presenile gangrene                                           | Peripheral vascular disease |
| G731z00 | thromboangiitis obliterans nos                               | Peripheral vascular disease |
| G732.00 | peripheral gangrene                                          | Peripheral vascular disease |
| G732000 | gangrene of toe                                              | Peripheral vascular disease |

|         |                                                           |                             |
|---------|-----------------------------------------------------------|-----------------------------|
| G732100 | gangrene of foot                                          | Peripheral vascular disease |
| G732200 | gangrene of finger                                        | Peripheral vascular disease |
| G732300 | gangrene of thumb                                         | Peripheral vascular disease |
| G732400 | gangrene of hand                                          | Peripheral vascular disease |
| G73y.00 | other specified peripheral vascular disease               | Peripheral vascular disease |
| G73yz00 | other specified peripheral vascular disease nos           | Peripheral vascular disease |
| G73zz00 | peripheral vascular disease nos                           | Peripheral vascular disease |
| G741.00 | embolism and thrombosis of the thoracic aorta             | Peripheral vascular disease |
| G742.00 | embolism and thrombosis of an arm or leg artery           | Peripheral vascular disease |
| G742000 | embolism and thrombosis of the brachial artery            | Peripheral vascular disease |
| G742100 | embolism and thrombosis of the radial artery              | Peripheral vascular disease |
| G742200 | embolism and thrombosis of the ulnar artery               | Peripheral vascular disease |
| G742300 | embolism and thrombosis of an arm artery nos              | Peripheral vascular disease |
| G742400 | embolism and thrombosis of the femoral artery             | Peripheral vascular disease |
| G742500 | embolism and thrombosis of the popliteal artery           | Peripheral vascular disease |
| G742600 | embolism and thrombosis of the anterior tibial artery     | Peripheral vascular disease |
| G742700 | embolism and thrombosis of the dorsalis pedis artery      | Peripheral vascular disease |
| G742800 | embolism and thrombosis of the posterior tibial artery    | Peripheral vascular disease |
| G742900 | embolism and thrombosis of a leg artery nos               | Peripheral vascular disease |
| G742z00 | peripheral arterial embolism and thrombosis nos           | Peripheral vascular disease |
| G74y.00 | embolism and thrombosis of other specified artery         | Peripheral vascular disease |
| G74y000 | embolism and/or thrombosis of the common iliac artery     | Peripheral vascular disease |
| G74y300 | embolism and thrombosis of the iliac artery unspecified   | Peripheral vascular disease |
| G74y500 | embolism and thrombosis of the subclavian artery          | Peripheral vascular disease |
| G74y600 | embolism and thrombosis of the splenic artery             | Peripheral vascular disease |
| G74y700 | embolism and thrombosis of the axillary artery            | Peripheral vascular disease |
| G74y800 | embolism and thrombosis of the coeliac artery             | Peripheral vascular disease |
| G74y900 | embolism and thrombosis of the hepatic artery             | Peripheral vascular disease |
| G74yz00 | embolism and thrombosis of other arteries nos             | Peripheral vascular disease |
| G74z.00 | arterial embolism and thrombosis nos                      | Peripheral vascular disease |
| G76A.00 | arterial insufficiency                                    | Peripheral vascular disease |
| Gyu7000 | [x]atherosclerosis of other arteries                      | Peripheral vascular disease |
| Gyu7100 | [x]aortic aneurysm of unspecified site, ruptured          | Peripheral vascular disease |
| Gyu7200 | [x]aortic aneurysm of unspecified site, nonruptured       | Peripheral vascular disease |
| Gyu7300 | [x]aneurysm of other specified arteries                   | Peripheral vascular disease |
| Gyu7400 | [x]other specified peripheral vascular diseases           | Peripheral vascular disease |
| Gyu7800 | [x]aneurysm of aorta in diseases classified elsewhere     | Peripheral vascular disease |
| 7A47z00 | other emergency bypass of femoral or popliteal artery nos | Peripheral vascular disease |
| P76z.00 | peripheral vascular system anomaly nos                    | Peripheral vascular disease |
| 7A47y00 | other emergency bypass of femoral or popliteal artery os  | Peripheral vascular disease |
| R054.00 | [d]gangrene                                               | Peripheral vascular disease |
| R054000 | [d]gangrene, spreading cutaneous                          | Peripheral vascular disease |
| R054z00 | [d]gangrene nos                                           | Peripheral vascular disease |
| SP12z00 | peripheral vascular complications of care nos             | Peripheral vascular disease |
| 7A42.11 | reconstruction of common iliac artery                     | Peripheral vascular disease |
| 7A48.16 | other bypass of superficial femoral artery                | Peripheral vascular disease |

|         |                                                              |                             |
|---------|--------------------------------------------------------------|-----------------------------|
| 7A48.15 | other bypass of popliteal artery                             | Peripheral vascular disease |
| 7A48.14 | other bypass of femoral artery                               | Peripheral vascular disease |
| 7A48.12 | other bypass of common femoral artery                        | Peripheral vascular disease |
| 7A48.11 | other bypass of femoral or popliteal artery by anastomosis   | Peripheral vascular disease |
| 7A47.16 | other emergency bypass of femoral artery                     | Peripheral vascular disease |
| 7A47.15 | other emergency bypass of superficial femoral artery         | Peripheral vascular disease |
| 7A47.14 | other emergency bypass of popliteal artery                   | Peripheral vascular disease |
| 7A47.13 | other emergency bypass of deep femoral artery                | Peripheral vascular disease |
| 7A47.12 | other emergency bypass of common femoral artery              | Peripheral vascular disease |
| 7A45.14 | emergency replacement of aneurysmal popliteal artery         | Peripheral vascular disease |
| 7A45.12 | emergency replacement of aneurysmal common femoral artery    | Peripheral vascular disease |
| 7A41.11 | other bypass of iliac artery by anastomosis                  | Peripheral vascular disease |
| 7A14.11 | aortic aneurysm repair                                       | Peripheral vascular disease |
| 7A11211 | y graft of abdominal aortic aneurysm (emergency)             | Peripheral vascular disease |
| 7A14411 | tube graft of abdominal aortic aneurysm                      | Peripheral vascular disease |
| 7A13411 | tube graft abdominal aortic aneurysm (emergency)             | Peripheral vascular disease |
| 7A40.11 | replacement of aneurysmal iliac artery by anastomosis        | Peripheral vascular disease |
| G73..13 | peripheral ischaemia                                         | Peripheral vascular disease |
| G73..11 | peripheral ischaemic vascular disease                        | Peripheral vascular disease |
| 7A1B.00 | transluminal operations on aneurysmal segment of aorta       | Peripheral vascular disease |
| 7A1B200 | endovascular stenting of thoracic aortic aneurysm            | Peripheral vascular disease |
| M271400 | mixed venous and arterial leg ulcer                          | Peripheral vascular disease |
| M271300 | arterial leg ulcer                                           | Peripheral vascular disease |
| 7A58.00 | transluminal coil embolisation of aneurysm                   | Peripheral vascular disease |
| 7A1B300 | endovascular stenting of aortic dissection in any position   | Peripheral vascular disease |
| 7A1B500 | endovascular stenting of aorto-uniiliac aneurysm             | Peripheral vascular disease |
| 7A1B100 | endovascular stenting of suprarenal aortic aneurysm          | Peripheral vascular disease |
| 7A5B.00 | other transluminal embolisation of aneurysm                  | Peripheral vascular disease |
| 7A48y00 | other bypass of femoral artery or popliteal artery os        | Peripheral vascular disease |
| 16l..00 | claudication distance                                        | Peripheral vascular disease |
| 7A58y00 | other specified transluminal coil embolisation of aneurysm   | Peripheral vascular disease |
| 7A59.00 | transluminal balloon assisted coil embolisation of aneurysm  | Peripheral vascular disease |
| 7A58z00 | transluminal coil embolisation of aneurysm nos               | Peripheral vascular disease |
| 7A5By00 | other specified other transluminal embolisation of aneurysm  | Peripheral vascular disease |
| 7A1Bz00 | transluminal operations on aneurysmal segment of aorta nos   | Peripheral vascular disease |
| 7A5A.00 | transluminal stent assisted coil embolisation of aneurysm    | Peripheral vascular disease |
| 7A5Bz00 | other transluminal embolisation of aneurysm nos              | Peripheral vascular disease |
| 7A14.00 | other replacement of aneurysmal segment of aorta             | Peripheral vascular disease |
| 7A40.00 | replacement of aneurysmal iliac artery                       | Peripheral vascular disease |
| 7A41.00 | other bypass of iliac artery                                 | Peripheral vascular disease |
| 7A46.00 | other replacement of aneurysmal femoral artery               | Peripheral vascular disease |
| 7A47.00 | other emergency bypass of femoral artery or popliteal artery | Peripheral vascular disease |
| 7A48.00 | other bypass of femoral artery or popliteal artery           | Peripheral vascular disease |
| G341100 | other cardiac wall aneurysm                                  | Peripheral vascular disease |
| G73..00 | other peripheral vascular disease                            | Peripheral vascular disease |
| G740.00 | embolism and thrombosis of the abdominal aorta               | Peripheral vascular disease |

|         |                                                              |                             |
|---------|--------------------------------------------------------------|-----------------------------|
| P76..00 | other peripheral vascular system anomalies                   | Peripheral vascular disease |
| P767.00 | congenital peripheral aneurysm                               | Peripheral vascular disease |
| 7A11311 | y graft abdominal aortic aneurysm                            | Peripheral vascular disease |
| 7A42011 | endarterectomy and patch repair of common iliac artery       | Peripheral vascular disease |
| 7A42111 | endarterectomy of common iliac artery nec                    | Peripheral vascular disease |
| 7A43.11 | other open operations on common iliac artery                 | Peripheral vascular disease |
| 7A43011 | repair of common iliac artery nec                            | Peripheral vascular disease |
| 7A44.11 | transluminal operations on common iliac artery               | Peripheral vascular disease |
| 7A46.15 | other replacement of aneurysmal superficial femoral artery   | Peripheral vascular disease |
| 7A46.14 | other replacement of aneurysmal popliteal artery             | Peripheral vascular disease |
| 7A43111 | open embolectomy of common iliac artery                      | Peripheral vascular disease |
| G73z011 | claudication                                                 | Peripheral vascular disease |
| G72y200 | aneurysm of internal carotid artery                          | Peripheral vascular disease |
| G72yA00 | aneurysm of hepatic artery                                   | Peripheral vascular disease |
| G701011 | aras - atherosclerotic renal artery stenosis                 | Peripheral vascular disease |
| 14NB.00 | h/o: peripheral vascular disease procedure                   | Peripheral vascular disease |
| G723500 | ruptured popliteal artery aneurysm                           | Peripheral vascular disease |
| 7A6H400 | percutaneous transluminal angioplasty of vascular graft      | Peripheral vascular disease |
| G713000 | ruptured suprarenal aortic aneurysm                          | Peripheral vascular disease |
| G714000 | juxtarenal aortic aneurysm                                   | Peripheral vascular disease |
| G714100 | inflammatory abdominal aortic aneurysm                       | Peripheral vascular disease |
| 7A23z00 | operation on cerebral artery/ circle of willis aneurysm nos  | Peripheral vascular disease |
| 7A34K00 | operation on aneurysm visceral branch of abdominal aorta nec | Peripheral vascular disease |
| G723.00 | aneurysm of leg artery                                       | Peripheral vascular disease |
| G72y000 | aneurysm of common carotid art                               | Peripheral vascular disease |
| G720.00 | aneurysm of artery of arm                                    | Peripheral vascular disease |
| 7A1B600 | endovascular stenting for aortic aneurysm of bifurcation nec | Peripheral vascular disease |
| 7A1B700 | endovascular stenting for aorto-uniiliac aneurysm            | Peripheral vascular disease |
| G74..00 | arterial embolism and thrombosis                             | Peripheral vascular disease |
| 7A44211 | arteriography of common iliac artery                         | Peripheral vascular disease |
| G70..00 | atherosclerosis                                              | Peripheral vascular disease |
| 7A10200 | axillo-bifemoral bypass graft                                | Peripheral vascular disease |
| P7y0100 | congenital cerebral arteriovenous aneurysm                   | Peripheral vascular disease |
| 7A10100 | bypass aorta by anastomosis axillary to femoral artery nec   | Peripheral vascular disease |
| 7A12100 | bypass bifurc aorta by anastom aorta to femoral artery nec   | Peripheral vascular disease |
| 7A41900 | bypass common iliac artery by aorta/com iliac art anast nec  | Peripheral vascular disease |
| 7A48800 | bypass femoral artery by fem/peron a anast c prosthesis nec  | Peripheral vascular disease |
| 7A48A00 | bypass femoral artery by fem/peron a anast c vein graft nec  | Peripheral vascular disease |
| 7A48000 | bypass femoral artery by fem/pop art anast c prosthesis nec  | Peripheral vascular disease |
| 7A48400 | bypass femoral artery by fem/tib art anast c prosthesis nec  | Peripheral vascular disease |
| 7A48C00 | bypass femoral artery by femoral/femoral art anastomosis nec | Peripheral vascular disease |
| 7A41300 | bypass iliac artery by femoral/femoral art anastomosis nec   | Peripheral vascular disease |
| 7A41100 | bypass iliac artery by iliac/femoral artery anastomosis nec  | Peripheral vascular disease |
| 7A41D00 | bypass iliac artery by iliac/iliac artery anastomosis nec    | Peripheral vascular disease |
| 7A48300 | bypass popliteal artery by pop/pop a anast c vein graft nec  | Peripheral vascular disease |
| 7A48700 | bypass popliteal artery by pop/tib a anast c vein graft nec  | Peripheral vascular disease |



|         |                                                              |                                 |
|---------|--------------------------------------------------------------|---------------------------------|
| G721.00 | aneurysm of renal artery                                     | Peripheral vascular disease     |
| G72y400 | aneurysm of subclavian artery                                | Peripheral vascular disease     |
| G743.00 | embolism and thrombosis of other and unspec parts aorta      | Peripheral vascular disease     |
| 7A12000 | emerg bypass bifurc aorta by anast aorta to femoral artery   | Peripheral vascular disease     |
| 7A47200 | emerg bypass femoral art by fem/pop a anast c vein graft nec | Peripheral vascular disease     |
| 7A47600 | emerg bypass femoral art by fem/tib a anast c vein graft nec | Peripheral vascular disease     |
| 7A47C00 | emerg bypass femoral artery by fem/fem art anastomosis nec   | Peripheral vascular disease     |
| 7A41000 | emerg bypass iliac art by iliac/femoral art anastomosis nec  | Peripheral vascular disease     |
| 7A41200 | emerg bypass iliac artery by femoral/femoral art anast nec   | Peripheral vascular disease     |
| 7A47300 | emerg bypass pop art by pop/pop art anast c vein graft nec   | Peripheral vascular disease     |
| 7A47700 | emerg bypass pop art by pop/tib art anast c vein graft nec   | Peripheral vascular disease     |
| 7A11000 | emerg repl aneurysm bifurc aorta by anast aorta to fem art   | Peripheral vascular disease     |
| 7A11200 | emerg repl aneurysm bifurc aorta by anast aorta to iliac a   | Peripheral vascular disease     |
| 7A13400 | emerg replace aneurysm abdom aorta by anast aorta/aorta nec  | Peripheral vascular disease     |
| 7A13000 | emerg replace aneurysm asc aorta by anastom aorta to aorta   | Peripheral vascular disease     |
| 7A45200 | emerg replace aneurysm fem art by fem/pop anast c vein graft | Peripheral vascular disease     |
| 7A45000 | emerg replace aneurysm fem art by fem/pop art anast c prosth | Peripheral vascular disease     |
| 7A40000 | emerg replace aneurysm iliac art by iliac/femoral art anast  | Peripheral vascular disease     |
| 7A13300 | emerg replace aneurysm infrarenal aorta by anast aorta/aorta | Peripheral vascular disease     |
| 7A45700 | emerg replace aneurysm pop art by pop/tib anast c vein graft | Peripheral vascular disease     |
| 7A45D00 | emerg replace aneurysm pop artery by pop/fem art anastomosis | Peripheral vascular disease     |
| 7A13100 | emerg replace aneurysm thor aorta by anastom aorta to aorta  | Peripheral vascular disease     |
| 7A40200 | emerg replace aneurysmal iliac artery by fem/fem art anast   | Peripheral vascular disease     |
| 7A45y00 | emergency replacement aneurysmal femoral/popliteal artery os | Peripheral vascular disease     |
| 7A45.15 | emergency replacement aneurysmal superficial femoral artery  | Peripheral vascular disease     |
| 7A45.00 | emergency replacement of aneurysmal femoral/popliteal artery | Peripheral vascular disease     |
| 7A13y00 | emergency replacement of aneurysmal segment of aorta os      | Peripheral vascular disease     |
| G72y600 | aneurysm of axillary artery                                  | Peripheral vascular disease     |
| 9m1..00 | peripheral vascular disease monitoring invitation            | Peripheral vascular disease     |
| 9m10.00 | peripheral vascular disease monitoring first letter          | Peripheral vascular disease     |
| G73..12 | ischaemia of legs                                            | Peripheral vascular disease     |
| 7A1BA00 | endovascular insertion of stent for thoracic aortic aneurysm | Peripheral vascular disease     |
| 7A1BD00 | endovascular insertion of stent for aorto-uniiliac aneurysm  | Peripheral vascular disease     |
| G723100 | aneurysm of popliteal artery                                 | Peripheral vascular disease     |
| G731.00 | thromboangiitis obliterans                                   | Peripheral vascular disease     |
| G731000 | buerger's disease                                            | Peripheral vascular disease     |
| G70y000 | carotid artery atherosclerosis                               | Peripheral vascular disease     |
| 7A32000 | percutaneous transluminal angioplasty of renal artery        | Peripheral vascular disease     |
| 4439A   | intermittent claudication                                    | Peripheral vascular disease     |
| g71..00 | aortic aneurysm                                              | Peripheral vascular disease     |
| 4419    | aortic aneurysm                                              | Peripheral vascular disease     |
| G40..00 | acute pulmonary heart disease                                | Pulmonary circulation disorders |
| H541.00 | pulmonary congestion                                         | Pulmonary circulation disorders |
| G41z.11 | chronic cor pulmonale                                        | Pulmonary circulation disorders |
| G41..00 | chronic pulmonary heart disease                              | Pulmonary circulation disorders |
| G41y000 | secondary pulmonary hypertension                             | Pulmonary circulation disorders |

|         |                                                              |                                 |
|---------|--------------------------------------------------------------|---------------------------------|
| P736.12 | pulmonary arterio-venous malformation                        | Pulmonary circulation disorders |
| G4...00 | pulmonary circulation diseases                               | Pulmonary circulation disorders |
| G42..11 | pulmonary vessel disease                                     | Pulmonary circulation disorders |
| G401000 | post operative pulmonary embolus                             | Pulmonary circulation disorders |
| 7A0B000 | pulmonary thromboendarterectomy                              | Pulmonary circulation disorders |
| L43z.00 | obstetric pulmonary embolism nos                             | Pulmonary circulation disorders |
| G40z.00 | acute pulmonary heart disease nos                            | Pulmonary circulation disorders |
| G41y.00 | other chronic pulmonary heart disease                        | Pulmonary circulation disorders |
| G41yz00 | other chronic pulmonary heart disease nos                    | Pulmonary circulation disorders |
| G4y..00 | other specified pulmonary circulation disease                | Pulmonary circulation disorders |
| G42yz00 | other specified pulmonary circulation disease nos            | Pulmonary circulation disorders |
| G42z.00 | other pulmonary circulation disease nos                      | Pulmonary circulation disorders |
| G4z..00 | pulmonary circulation disease nos                            | Pulmonary circulation disorders |
| Gyu4100 | [x]other diseases of pulmonary vessels                       | Pulmonary circulation disorders |
| H54..00 | pulmonary congestion and hypostasis                          | Pulmonary circulation disorders |
| L096400 | pulmonary embolism following abortive pregnancy              | Pulmonary circulation disorders |
| L43..00 | obstetric pulmonary embolism                                 | Pulmonary circulation disorders |
| L430.00 | obstetric air pulmonary embolism                             | Pulmonary circulation disorders |
| L431100 | amniotic fluid pulmonary embolism - delivered                | Pulmonary circulation disorders |
| L432.00 | obstetric blood-clot pulmonary embolism                      | Pulmonary circulation disorders |
| L43yz00 | other obstetric pulmonary embolism nos                       | Pulmonary circulation disorders |
| L43zz00 | obstetric pulmonary embolism nos                             | Pulmonary circulation disorders |
| L43z000 | obstetric pulmonary embolism nos, unspecified                | Pulmonary circulation disorders |
| L43z100 | obstetric pulmonary embolism nos - delivered                 | Pulmonary circulation disorders |
| L43z400 | obstetric pulmonary embolism nos with postnatal complication | Pulmonary circulation disorders |
| SB16.00 | pulmonary blood vessel injury                                | Pulmonary circulation disorders |
| G41y100 | thromboembolic pulmonary hypertension                        | Pulmonary circulation disorders |
| 7Q01000 | primary pulmonary hypertension drugs band 1                  | Pulmonary circulation disorders |
| 7Q01100 | primary pulmonary hypertension drugs band 2                  | Pulmonary circulation disorders |
| 7Q01200 | primary pulmonary hypertension drugs band 3                  | Pulmonary circulation disorders |
| 7Q01300 | primary pulmonary hypertension drugs band 4                  | Pulmonary circulation disorders |
| G42y.00 | other specified pulmonary circulation disease                | Pulmonary circulation disorders |
| P737.11 | dilatation of pulmonary artery                               | Pulmonary circulation disorders |
| 7A6Ky00 | other specified operations on individual pulmonary veins     | Pulmonary circulation disorders |
| G41z.00 | chronic pulmonary heart disease nos                          | Pulmonary circulation disorders |
| G42..00 | other pulmonary circulation disease                          | Pulmonary circulation disorders |
| Gyu4.00 | [x]pulmon heart disease & diseases of pulmonary circulation  | Pulmonary circulation disorders |
| G410.00 | primary pulmonary hypertension                               | Pulmonary circulation disorders |
| ZV12900 | [v] personal history of pulmonary embolism                   | Pulmonary circulation disorders |
| L431.00 | amniotic fluid pulmonary embolism                            | Pulmonary circulation disorders |
| G401100 | recurrent pulmonary embolism                                 | Pulmonary circulation disorders |
| G411.00 | kyphoscoliotic heart disease                                 | Pulmonary circulation disorders |
| G4...11 | heart disease - pulmonary                                    | Pulmonary circulation disorders |
| G400.00 | acute cor pulmonale                                          | Pulmonary circulation disorders |
| G401.00 | pulmonary embolism                                           | Pulmonary circulation disorders |
| K00..11 | acute nephritis                                              | Renal disease                   |

|         |                                                                                    |               |
|---------|------------------------------------------------------------------------------------|---------------|
| K100.00 | chronic pyelonephritis                                                             | Renal disease |
| 7L1A011 | thomas intravascular shunt for dialysis                                            | Renal disease |
| A160200 | tuberculous pyelonephritis                                                         | Renal disease |
| K01x411 | lupus nephritis                                                                    | Renal disease |
| K13yB00 | ischaemic nephropathy                                                              | Renal disease |
| 7L1A100 | peritoneal dialysis                                                                | Renal disease |
| K081.00 | nephrogenic diabetes insipidus                                                     | Renal disease |
| K08y511 | ain - acute interstitial nephritis                                                 | Renal disease |
| K08y513 | acute tubulo-interstitial nephritis                                                | Renal disease |
| ZV56011 | [v]aftercare involving renal dialysis nos                                          | Renal disease |
| ZV56y11 | [v]aftercare involving peritoneal dialysis                                         | Renal disease |
| K08y700 | acute infective interstitial nephritis                                             | Renal disease |
| K013.12 | steroid sensitive nephrotic syndrome                                               | Renal disease |
| K13yz11 | salt-losing nephritis                                                              | Renal disease |
| 7B00400 | allograft transplantation kidney from cadaver, heart non-beating                   | Renal disease |
| K0A1300 | rapid progressive nephritic syndrome of mesangial proliferative glomerulonephritis | Renal disease |
| 7L1B200 | flushing of peritoneal dialysis catheter                                           | Renal disease |
| SP06B00 | continuous ambulatory peritoneal dialysis associated peritonitis                   | Renal disease |
| TB11.11 | renal dialysis with complication, without blame                                    | Renal disease |
| TB00111 | renal transplant with complication, without blame                                  | Renal disease |
| 7L1B100 | removal of ambulatory peritoneal dialysis catheter                                 | Renal disease |
| K06..12 | kidney failure unspecified                                                         | Renal disease |
| G72D200 | aneurysm of anastomotic site of dialysis arteriovenous fistula                     | Renal disease |
| K01w112 | wilms' tumour + nephrotic syndrome + pseudohermaphroditism                         | Renal disease |
| SP0E.00 | disorders associated with peritoneal dialysis                                      | Renal disease |
| Gy41.00 | infection of dialysis arteriovenous fistula                                        | Renal disease |
| K0A2700 | recurrent+persistent haematuria diffuse crescentic glomerulonephritis              | Renal disease |
| K0A2200 | recurrent+persistent haematuria diffuse membranous glomerulonephritis              | Renal disease |
| K0A2300 | recurrent+persistent haematuria diffuse mesangial proliferative glomerulonephritis | Renal disease |
| K0A2500 | recurrent+persistent haematuria diffuse mesangiocapillary glomerulonephritis       | Renal disease |
| K0A1200 | rapid progressive nephritic syndrome diffuse membranous glomerulonephritis         | Renal disease |
| K0A1700 | rapid progressive nephritic syndrome diffuse crescentic glomerulonephritis         | Renal disease |
| K0A1100 | rapid progressive nephritic syndrome focal+segmental glomerular lesion             | Renal disease |
| K0A1600 | rapid progressive nephritic syndrome, dense deposit disease                        | Renal disease |
| 661M200 | chronic kidney disease self-management plan agreed                                 | Renal disease |
| F374A00 | polyneuropathy in uraemia                                                          | Renal disease |
| K050.00 | end stage renal failure                                                            | Renal disease |
| SP08T00 | urological complication of renal transplant                                        | Renal disease |
| SP08W00 | vascular complication of renal transplant                                          | Renal disease |
| G72C.00 | ruptured aneurysm of dialysis vascular access                                      | Renal disease |
| G72D.00 | aneurysm of dialysis arteriovenous fistula                                         | Renal disease |
| G72D100 | aneurysm of needle site of dialysis arteriovenous fistula                          | Renal disease |
| K04E.00 | acute kidney injury stage 3                                                        | Renal disease |
| Gy1..00 | stenosis of dialysis vascular access                                               | Renal disease |
| SP0F.00 | haemodialysis first use syndrome                                                   | Renal disease |
| SP0G.00 | anaphylactoid reaction due to haemodialysis                                        | Renal disease |

|         |                                                              |               |
|---------|--------------------------------------------------------------|---------------|
| 67P4100 | discussion about kidney transplantation                      | Renal disease |
| Gy3..00 | occlusion of dialysis vascular access                        | Renal disease |
| Gy5..00 | haemorrhage of dialysis vascular access                      | Renal disease |
| Gy10.00 | stenosis of dialysis arteriovenous graft                     | Renal disease |
| Gy21.00 | thrombosis of dialysis arteriovenous fistula                 | Renal disease |
| Gy30.00 | occlusion of dialysis arteriovenous graft                    | Renal disease |
| Gy31.00 | occlusion of dialysis arteriovenous fistula                  | Renal disease |
| Gy40.00 | infection of dialysis arteriovenous graft                    | Renal disease |
| Gy51.00 | haemorrhage of dialysis arteriovenous fistula                | Renal disease |
| Gy60.00 | rupture of dialysis arteriovenous graft                      | Renal disease |
| 7L1B.00 | placement ambulatory apparatus compensation renal failure    | Renal disease |
| 7L1By00 | placement ambulatory apparatus- compensate renal failure os  | Renal disease |
| 7L1B.11 | placement ambulatory dialysis apparatus - compens renal fail | Renal disease |
| 7L1C.00 | placement other apparatus for compensation for renal failure | Renal disease |
| 7L1Cz00 | placement other apparatus- compensate for renal failure nos  | Renal disease |
| 7L1Cy00 | placement other apparatus- compensate for renal failure os   | Renal disease |
| K190X00 | persistent proteinuria, unspecified                          | Renal disease |
| K0G..00 | sickle cell nephropathy                                      | Renal disease |
| 4N0..00 | dialysis fluid urea level                                    | Renal disease |
| 4N2..00 | dialysis fluid glucose level                                 | Renal disease |
| A786.00 | haemorrhagic nephrosonephritis                               | Renal disease |
| 14D1.00 | h/o: nephritis                                               | Renal disease |
| 14S2.00 | h/o: kidney recipient                                        | Renal disease |
| 14V2.11 | h/o: kidney dialysis                                         | Renal disease |
| 14V2.00 | h/o: renal dialysis                                          | Renal disease |
| 7261011 | cyclodialysis                                                | Renal disease |
| 4I29.00 | peritoneal dialysis sample                                   | Renal disease |
| SP07G00 | stenosis of arteriovenous dialysis fistula                   | Renal disease |
| 7257300 | correction iridodialysis nec                                 | Renal disease |
| 7L1f000 | extracorporeal albumin haemodialysis                         | Renal disease |
| 7A60600 | creation of graft fistula for dialysis                       | Renal disease |
| 7L1A400 | automated peritoneal dialysis                                | Renal disease |
| 7B00212 | cadaveric renal transplant                                   | Renal disease |
| 7B06300 | exploration of renal transplant                              | Renal disease |
| PD23.00 | congenital hydronephrosis                                    | Renal disease |
| K055.00 | chronic kidney disease stage 5                               | Renal disease |
| K051.00 | chronic kidney disease stage 1                               | Renal disease |
| K052.00 | chronic kidney disease stage 2                               | Renal disease |
| K054.00 | chronic kidney disease stage 4                               | Renal disease |
| K05..13 | chronic kidney disease                                       | Renal disease |
| K053.00 | chronic kidney disease stage 3                               | Renal disease |
| 7L1A200 | haemodialysis nec                                            | Renal disease |
| 7L1Ay00 | other specified compensation for renal failure               | Renal disease |
| 7L1Az00 | compensation for renal failure nos                           | Renal disease |
| 7L1C000 | insertion of temporary peritoneal dialysis catheter          | Renal disease |
| 8882.00 | intestinal dialysis                                          | Renal disease |

|         |                                                            |               |
|---------|------------------------------------------------------------|---------------|
| K080.00 | renal osteodystrophy                                       | Renal disease |
| K080300 | renal rickets                                              | Renal disease |
| 8L50.00 | renal transplant planned                                   | Renal disease |
| A160000 | tuberculous nephropathy                                    | Renal disease |
| A844100 | plasmodium malariae malaria with nephropathy               | Renal disease |
| C341.00 | gouty nephropathy                                          | Renal disease |
| C341z00 | gouty nephropathy nos                                      | Renal disease |
| Cyu2300 | [x]unspecified diabetes mellitus with renal complications  | Renal disease |
| G222.00 | hypertensive renal disease with renal failure              | Renal disease |
| G233.00 | hypertensive heart and renal disease with renal failure    | Renal disease |
| SP01500 | mechanical complication of dialysis catheter               | Renal disease |
| K0...00 | nephritis, nephrosis and nephrotic syndrome                | Renal disease |
| K000.00 | acute proliferative glomerulonephritis                     | Renal disease |
| K001.00 | acute nephritis with lesions of necrotising glomerulitis   | Renal disease |
| K00y.00 | other acute glomerulonephritis                             | Renal disease |
| K00y000 | acute glomerulonephritis in diseases ec                    | Renal disease |
| K00y100 | acute exudative nephritis                                  | Renal disease |
| K00y200 | acute focal nephritis                                      | Renal disease |
| K00y300 | acute diffuse nephritis                                    | Renal disease |
| K00yz00 | other acute glomerulonephritis nos                         | Renal disease |
| K00z.00 | acute glomerulonephritis nos                               | Renal disease |
| K010.00 | nephrotic syndrome with proliferative glomerulonephritis   | Renal disease |
| K011.00 | nephrotic syndrome with membranous glomerulonephritis      | Renal disease |
| K014.00 | nephrotic syndrome, minor glomerular abnormality           | Renal disease |
| K015.00 | nephrotic syndrome, focal and segmental glomerular lesions | Renal disease |
| K016.00 | nephrotic syndrome, diffuse membranous glomerulonephritis  | Renal disease |
| K01A.00 | nephrotic syndrome, dense deposit disease                  | Renal disease |
| K01B.00 | nephrotic syndrome, diffuse crescentic glomerulonephritis  | Renal disease |
| K01x.00 | nephrotic syndrome in diseases ec                          | Renal disease |
| K01x000 | nephrotic syndrome in amyloidosis                          | Renal disease |
| K01x100 | nephrotic syndrome in diabetes mellitus                    | Renal disease |
| K01x111 | kimmelstiel - wilson disease                               | Renal disease |
| K01x200 | nephrotic syndrome in malaria                              | Renal disease |
| K01x300 | nephrotic syndrome in polyarteritis nodosa                 | Renal disease |
| K01y.00 | nephrotic syndrome with other pathological kidney lesions  | Renal disease |
| K01z.00 | nephrotic syndrome nos                                     | Renal disease |
| K023.00 | chronic rapidly progressive glomerulonephritis             | Renal disease |
| K02y.00 | other chronic glomerulonephritis                           | Renal disease |
| K02y200 | chronic focal glomerulonephritis                           | Renal disease |
| K02y300 | chronic diffuse glomerulonephritis                         | Renal disease |
| K02yz00 | other chronic glomerulonephritis nos                       | Renal disease |
| K02z.00 | chronic glomerulonephritis nos                             | Renal disease |
| K030.00 | proliferative nephritis unspecified                        | Renal disease |
| K031.00 | membranous nephritis unspecified                           | Renal disease |
| K032.00 | membranoproliferative nephritis unspecified                | Renal disease |
| K032000 | focal membranoproliferative glomerulonephritis             | Renal disease |

|         |                                                            |               |
|---------|------------------------------------------------------------|---------------|
| K032300 | anaphylactoid glomerulonephritis                           | Renal disease |
| K032500 | other familial glomerulonephritis                          | Renal disease |
| K032600 | berger's iga or igg nephropathy                            | Renal disease |
| K033.00 | rapidly progressive nephritis unspecified                  | Renal disease |
| K034.00 | renal cortical necrosis unspecified                        | Renal disease |
| K035.00 | renal medullary necrosis unspecified                       | Renal disease |
| K03y.00 | other nephritis and nephrosis unspecified                  | Renal disease |
| K03y000 | other nephritis and nephrosis in diseases ec               | Renal disease |
| K03y200 | other interstitial nephritis                               | Renal disease |
| K03yz00 | other nephritis and nephrosis nos                          | Renal disease |
| K03z.00 | unspecified glomerulonephritis nos                         | Renal disease |
| K04y.00 | other acute renal failure                                  | Renal disease |
| K04z.00 | acute renal failure nos                                    | Renal disease |
| K08..00 | impaired renal function disorder                           | Renal disease |
| K080000 | phosphate-losing tubular disorders                         | Renal disease |
| K080200 | renal infantilism                                          | Renal disease |
| K080z00 | renal osteodystrophy nos                                   | Renal disease |
| K08y.00 | other impaired renal function disorder                     | Renal disease |
| K08z.00 | impaired renal function disorder nos                       | Renal disease |
| K0A0000 | acute nephritic syndrome, minor glomerular abnormality     | Renal disease |
| K0A0600 | acute nephritic syndrome, dense deposit disease            | Renal disease |
| K0A1.00 | rapidly progressive nephritic syndrome                     | Renal disease |
| K0A3.00 | chronic nephritic syndrome                                 | Renal disease |
| K0A3000 | chronic nephritic syndrome, minor glomerular abnormality   | Renal disease |
| K0A3600 | chronic nephritic syndrome, dense deposit disease          | Renal disease |
| K0A4.00 | isolated proteinuria with specified morphological lesion   | Renal disease |
| K0A5.00 | hereditary nephropathy not elsewhere classified            | Renal disease |
| 1Z10.00 | chronic kidney disease stage 1                             | Renal disease |
| 1Z11.00 | chronic kidney disease stage 2                             | Renal disease |
| K0C4.00 | toxic nephropathy, not elsewhere classified                | Renal disease |
| K0y..00 | other specified nephritis, nephrosis or nephrotic syndrome | Renal disease |
| K0z..00 | nephritis, nephrosis and nephrotic syndrome nos            | Renal disease |
| K100000 | chronic pyelonephritis without medullary necrosis          | Renal disease |
| K100100 | chronic pyelonephritis with medullary necrosis             | Renal disease |
| K100200 | chronic pyelitis                                           | Renal disease |
| K100300 | chronic pyonephrosis                                       | Renal disease |
| K100z00 | chronic pyelonephritis nos                                 | Renal disease |
| K101000 | acute pyelonephritis without medullary necrosis            | Renal disease |
| K101100 | acute pyelonephritis with medullary necrosis               | Renal disease |
| 1Z12.00 | chronic kidney disease stage 3                             | Renal disease |
| K10y.00 | pyelonephritis and pyonephrosis unspecified                | Renal disease |
| K10y300 | pyelonephritis in diseases ec                              | Renal disease |
| 1Z13.00 | chronic kidney disease stage 4                             | Renal disease |
| 1Z14.00 | chronic kidney disease stage 5                             | Renal disease |
| Kyu1000 | [x]other chronic tubulo-interstitial nephritis             | Renal disease |
| Kyu1100 | [x]other and unspecified hydronephrosis                    | Renal disease |

|         |                                                             |               |
|---------|-------------------------------------------------------------|---------------|
| Kyu2000 | [x]other acute renal failure                                | Renal disease |
| Kyu2100 | [x]other chronic renal failure                              | Renal disease |
| Kyu5G00 | [x]persistent proteinuria, unspecified                      | Renal disease |
| SP08300 | kidney transplant failure and rejection                     | Renal disease |
| K00..00 | acute glomerulonephritis                                    | Renal disease |
| TA22000 | failure of sterile precautions during kidney dialysis       | Renal disease |
| K02..00 | chronic glomerulonephritis                                  | Renal disease |
| 7B00600 | xenograft renal transplant                                  | Renal disease |
| K03..12 | nephropathy, unspecified                                    | Renal disease |
| K105.00 | chronic infective interstitial nephritis                    | Renal disease |
| K100500 | chronic obstructive pyelonephritis                          | Renal disease |
| K032y15 | mixed membranous and proliferative glomerulonephritis nec   | Renal disease |
| K032y13 | mesangioproliferative glomerulonephritis nec                | Renal disease |
| K032y11 | hypocomplementaemic persistent glomerulonephritis nec       | Renal disease |
| K0A8.00 | rapidly progressive glomerulonephritis                      | Renal disease |
| K000100 | crescentic glomerulonephritis                               | Renal disease |
| K000111 | cgn - crescentic glomerulonephritis                         | Renal disease |
| K0A2800 | iga nephropathy                                             | Renal disease |
| K032y14 | mesangiocapillary glomerulonephritis nec                    | Renal disease |
| K060.11 | impaired renal function                                     | Renal disease |
| 1Z1..00 | chronic renal impairment                                    | Renal disease |
| K0E..00 | acute-on-chronic renal failure                              | Renal disease |
| C372400 | urate nephropathy                                           | Renal disease |
| C372411 | uric acid nephropathy                                       | Renal disease |
| D310100 | henoch-schonlein nephritis                                  | Renal disease |
| SP08R00 | renal transplant rejection                                  | Renal disease |
| SP08V00 | very mild acute rejection of renal transplant               | Renal disease |
| SP08H00 | acute rejection of renal transplant                         | Renal disease |
| SP08E00 | acute rejection of renal transplant - grade i               | Renal disease |
| SP08F00 | acute rejection of renal transplant - grade ii              | Renal disease |
| SP08G00 | acute rejection of renal transplant - grade iii             | Renal disease |
| SP08J00 | chronic rejection of renal transplant                       | Renal disease |
| SP08D00 | acute-on-chronic rejection of renal transplant              | Renal disease |
| C353600 | renal failure-associated hyperphosphataemia                 | Renal disease |
| 7L1A500 | continuous ambulatory peritoneal dialysis                   | Renal disease |
| 7L1A600 | peritoneal dialysis nec                                     | Renal disease |
| 7B0Fz00 | interventions associated with transplantation of kidney nos | Renal disease |
| Kyu0F00 | [x]hereditary nephropathy, unspecif morphological changes   | Renal disease |
| K0A5500 | [x]heredtry nephrpthy nec difus mesangiocapilry glomneph    | Renal disease |
| 7L1A.00 | compensation for renal failure                              | Renal disease |
| 7L1A000 | renal dialysis                                              | Renal disease |
| K013.00 | nephrotic syndrome with minimal change glomerulonephritis   | Renal disease |
| K03..11 | nephritis and nephropathy unspecified                       | Renal disease |
| K06..00 | renal failure unspecified                                   | Renal disease |
| K08yz00 | other impaired renal function disorder nos                  | Renal disease |
| K100600 | calculous pyelonephritis                                    | Renal disease |

|         |                                                               |               |
|---------|---------------------------------------------------------------|---------------|
| 7B00500 | allotransplantation of kidney from cadaver nec                | Renal disease |
| Kyu1400 | [x]nephropathy induced by other drugs+biological substances   | Renal disease |
| Q48y000 | congenital renal failure                                      | Renal disease |
| SP15411 | kidney failure as a complication of care                      | Renal disease |
| K042.00 | acute renal medullary necrosis                                | Renal disease |
| 90t..00 | chronic kidney disease monitoring administration              | Renal disease |
| 66i..00 | chronic kidney disease monitoring                             | Renal disease |
| 90t0.00 | chronic kidney disease monitoring first letter                | Renal disease |
| 90t1.00 | chronic kidney disease monitoring second letter               | Renal disease |
| 90t2.00 | chronic kidney disease monitoring third letter                | Renal disease |
| 90t3.00 | chronic kidney disease monitoring verbal invite               | Renal disease |
| 90t4.00 | chronic kidney disease monitoring telephone invite            | Renal disease |
| 6AA..00 | chronic kidney disease annual review                          | Renal disease |
| SP08N00 | unexplained episode of renal transplant dysfunction           | Renal disease |
| Kyu2.00 | [x]renal failure                                              | Renal disease |
| Kyu1E00 | [x]tubulo-interstit nephritis, not specif as acute or chron   | Renal disease |
| Kyu0900 | [x]unsp nephrit synd, diff mesang prolif glomerulonephritis   | Renal disease |
| K0B6.00 | balkan nephropathy                                            | Renal disease |
| K0A0400 | ac neph syn difus endocaplyr proliferative glomerulonephritis | Renal disease |
| TA02000 | accid cut,puncture,perf,h'ge - kidney dialysis                | Renal disease |
| SP05613 | [x] peritoneal dialysis associated peritonitis                | Renal disease |
| D215.00 | anaemia secondary to renal failure                            | Renal disease |
| K0A0300 | acut neph syn, diffuse mesangial proliferative glomnephritis  | Renal disease |
| K0A0500 | acute neph syn, diffuse mesangiocapillary glomerulonephritis  | Renal disease |
| K0A0200 | acute nephritic syn, diffuse membranous glomerulonephritis    | Renal disease |
| K0A0100 | acute nephritic syndrome, focal+segmental glomerular lesions  | Renal disease |
| K0A0700 | acute nephrotic syndrm diffuse crescentic glomerulonephritis  | Renal disease |
| K041.00 | acute renal cortical necrosis                                 | Renal disease |
| ZV42000 | [v]kidney transplanted                                        | Renal disease |
| ZV45100 | [v]renal dialysis status                                      | Renal disease |
| ZV56.00 | [v]aftercare involving intermittent dialysis                  | Renal disease |
| ZV56000 | [v]aftercare involving extracorporeal dialysis                | Renal disease |
| ZV56100 | [v]preparatory care for dialysis                              | Renal disease |
| ZV56y00 | [v]other specified aftercare involving intermittent dialysis  | Renal disease |
| ZV56z00 | [v]unspecified aftercare involving intermittent dialysis      | Renal disease |
| ZVu3G00 | [x]other dialysis                                             | Renal disease |
| G22z.11 | renal hypertension                                            | Renal disease |
| 7B00211 | allotransplantation of kidney from cadaver                    | Renal disease |
| K08y500 | acute interstitial nephritis                                  | Renal disease |
| D215000 | anaemia secondary to chronic renal failure                    | Renal disease |
| K0A0.00 | acute nephritic syndrome                                      | Renal disease |
| K05..11 | chronic uraemia                                               | Renal disease |
| K05..00 | chronic renal failure                                         | Renal disease |
| 9Ni9.00 | did not attend chronic kidney disease monitoring clinic       | Renal disease |
| K0A3300 | chron neph syn difus mesangial prolifrtiv glomerulonephritis  | Renal disease |
| K0A3400 | chron neph syn difuse endocap prolifrativ glomerulonephritis  | Renal disease |



|         |                                                              |               |
|---------|--------------------------------------------------------------|---------------|
| K0A3200 | chron nephritic syndrom difuse membranous glomerulonephritis | Renal disease |
| K02y000 | chronic glomerulonephritis + diseases ec                     | Renal disease |
| K022.00 | chronic membranoproliferative glomerulonephritis             | Renal disease |
| K021.00 | chronic membranous glomerulonephritis                        | Renal disease |
| K0A3500 | chronic neph syn difus mesangiocapillary glomerulonephritis  | Renal disease |
| K0A3700 | chronic nephritic syn diffuse crescentic glomerulonephritis  | Renal disease |
| K0A3100 | chronic nephritic syndrm focal+segmental glomerular lesions  | Renal disease |
| K020.00 | chronic proliferative glomerulonephritis                     | Renal disease |
| 1Z15.00 | chronic kidney disease stage 3a                              | Renal disease |
| 1Z16.00 | chronic kidney disease stage 3b                              | Renal disease |
| K100400 | nonobstructive reflux-associated chronic pyelonephritis      | Renal disease |
| 1Z17.00 | chronic kidney disease stage 1 with proteinuria              | Renal disease |
| 1Z18.00 | chronic kidney disease stage 1 without proteinuria           | Renal disease |
| 1Z19.00 | chronic kidney disease stage 2 with proteinuria              | Renal disease |
| 1Z1A.00 | chronic kidney disease stage 2 without proteinuria           | Renal disease |
| 1Z1B.00 | chronic kidney disease stage 3 with proteinuria              | Renal disease |
| 1Z1C.00 | chronic kidney disease stage 3 without proteinuria           | Renal disease |
| 1Z1D.00 | chronic kidney disease stage 3a with proteinuria             | Renal disease |
| 1Z1E.00 | chronic kidney disease stage 3a without proteinuria          | Renal disease |
| 1Z1F.00 | chronic kidney disease stage 3b with proteinuria             | Renal disease |
| 1Z1G.00 | chronic kidney disease stage 3b without proteinuria          | Renal disease |
| 1Z1H.00 | chronic kidney disease stage 4 with proteinuria              | Renal disease |
| 1Z1J.00 | chronic kidney disease stage 4 without proteinuria           | Renal disease |
| 1Z1K.00 | chronic kidney disease stage 5 with proteinuria              | Renal disease |
| 1Z1L.00 | chronic kidney disease stage 5 without proteinuria           | Renal disease |
| K080100 | renal dwarfism                                               | Renal disease |
| 1Z17.11 | ckd stage 1 with proteinuria                                 | Renal disease |
| 1Z19.11 | ckd stage 2 with proteinuria                                 | Renal disease |
| 1Z1A.11 | ckd stage 2 without proteinuria                              | Renal disease |
| 1Z1B.11 | ckd stage 3 with proteinuria                                 | Renal disease |
| 1Z1C.11 | ckd stage 3 without proteinuria                              | Renal disease |
| 1Z1D.11 | ckd stage 3a with proteinuria                                | Renal disease |
| 1Z1E.11 | ckd stage 3a without proteinuria                             | Renal disease |
| 1Z1F.11 | ckd stage 3b with proteinuria                                | Renal disease |
| 1Z1G.11 | ckd stage 3b without proteinuria                             | Renal disease |
| 1Z1H.11 | ckd stage 4 with proteinuria                                 | Renal disease |
| 1Z1J.11 | ckd stage 4 without proteinuria                              | Renal disease |
| 1Z1K.11 | ckd stage 5 with proteinuria                                 | Renal disease |
| 1Z1L.11 | ckd stage 5 without proteinuria                              | Renal disease |
| 7L1A.11 | dialysis for renal failure                                   | Renal disease |
| 7A61900 | ligation of arteriovenous dialysis fistula                   | Renal disease |
| 7A61A00 | ligation of arteriovenous dialysis graft                     | Renal disease |
| K05..12 | end stage renal failure                                      | Renal disease |
| K0D..00 | end-stage renal disease                                      | Renal disease |
| G22..00 | hypertensive renal disease                                   | Renal disease |
| K104.00 | xanthogranulomatous pyelonephritis                           | Renal disease |

|         |                                                               |               |
|---------|---------------------------------------------------------------|---------------|
| K032400 | familial glomerulonephritis in alport's syndrome              | Renal disease |
| K017.00 | nephrotic syn difus mesangial proliferativ glomerulonephritis | Renal disease |
| K019.00 | nephrotic syn,diffuse mesangiocapillary glomerulonephritis    | Renal disease |
| K018.00 | nephrotic syn,difus endocapillary prolifv glomerulonephritis  | Renal disease |
| K012.00 | nephrotic syndrome+membranoproliferative glomerulonephritis   | Renal disease |
| K02..11 | nephritis - chronic                                           | Renal disease |
| K03..00 | nephritis and nephropathy unspecified                         | Renal disease |
| K032z00 | nephritis unsp+membranoprolif glomerulonephritis lesion nos   | Renal disease |
| K032y00 | nephritis unsp+os membranoprolif glomerulonephritis lesion    | Renal disease |
| K02..12 | nephropathy - chronic                                         | Renal disease |
| K0C1.00 | nephropathy induced by other drugs meds and biologl substncs  | Renal disease |
| K0C2.00 | nephropathy induced by unspec drug medicament or biol subs    | Renal disease |
| K01w000 | finnish nephrosis syndrome                                    | Renal disease |
| K06..11 | uraemia nos                                                   | Renal disease |
| K0A4X00 | isolated proteinuria, with oth specif morpholog changes       | Renal disease |
| K0A4W00 | isolated proteinuria, with unspecified morpholog changes      | Renal disease |
| K013.11 | lipoid nephrosis                                              | Renal disease |
| TB00100 | kidney transplant with complication, without blame            | Renal disease |
| TB11.00 | kidney dialysis with complication, without blame              | Renal disease |
| K032200 | focal glomerulon + focal recurr macroscop glomerulonephritis  | Renal disease |
| F447C00 | iridodialysis                                                 | Renal disease |
| 7L1B000 | insertion of ambulatory peritoneal dialysis catheter          | Renal disease |
| K03V.00 | unspecified nephritic syndrome, dense deposit disease         | Renal disease |
| K03W.00 | unsp nephrit synd, diff endocap prolif glomerulonephritis     | Renal disease |
| K03X.00 | unsp nephrit synd, diff mesang prolif glomerulonephritis      | Renal disease |
| K01w.00 | congenital nephrotic syndrome                                 | Renal disease |
| K03U.00 | unspecif nephr synd, diff concentric glomerulonephritis       | Renal disease |
| K0A5000 | hereditary nephropathy nec, minor glomerular abnormality      | Renal disease |
| K0A5100 | hereditary nephropathy nec,focal+segmnt glomerular lesion     | Renal disease |
| K0A5600 | hereditary nephropathy, nec, dense deposit disease            | Renal disease |
| K0A5X00 | hereditary nephropathy, unspecif morphological changes        | Renal disease |
| K0A5200 | heredity nephropathy nec,difus membran glomerulnephritis      | Renal disease |
| K0A5300 | heredtry nephprpthy nec difus mesangial prolif glomnephrit    | Renal disease |
| K03T.00 | tubulo-interstit nephritis, not specif as acute or chron      | Renal disease |
| K01..00 | nephrotic syndrome                                            | Renal disease |
| 5932E   | renal failure                                                 | Renal disease |
| 7B00200 | transplantation of kidney from cadaver                        | Renal disease |
| K08y000 | hypokalaemic nephropathy                                      | Renal disease |
| K0C0.00 | analgesic nephropathy                                         | Renal disease |
| Z1A..00 | dialysis training                                             | Renal disease |
| Z1A1.00 | peritoneal dialysis training                                  | Renal disease |
| 5932EC  | chronic renal failure                                         | Renal disease |
| Z919.00 | care of haemodialysis equipment                               | Renal disease |
| Z919300 | reversing haemodialysis lines                                 | Renal disease |
| Z91A.00 | peritoneal dialysis bag procedure                             | Renal disease |
| Z919100 | priming haemodialysis lines                                   | Renal disease |

|         |                                                              |                                |
|---------|--------------------------------------------------------------|--------------------------------|
| Z1A2.00 | haemodialysis training                                       | Renal disease                  |
| N20..00 | polymyalgia rheumatica                                       | Rheumatic and collagen disease |
| N000300 | systemic lupus erythematosus with organ or sys involv        | Rheumatic and collagen disease |
| N040.00 | rheumatoid arthritis                                         | Rheumatic and collagen disease |
| N043200 | pauciarticular juvenile rheumatoid arthritis                 | Rheumatic and collagen disease |
| N043100 | acute polyarticular juvenile rheumatoid arthritis            | Rheumatic and collagen disease |
| C37z.11 | marinesco-sjogren syndrome                                   | Rheumatic and collagen disease |
| N044.11 | jaccoud's syndrome                                           | Rheumatic and collagen disease |
| N002.00 | sicca (sjogren's) syndrome                                   | Rheumatic and collagen disease |
| N003.11 | poikilodermatomyositis                                       | Rheumatic and collagen disease |
| N001.12 | systemic sclerosis                                           | Rheumatic and collagen disease |
| N001000 | progressive systemic sclerosis                               | Rheumatic and collagen disease |
| N04X.00 | seropositive rheumatoid arthritis, unspecified               | Rheumatic and collagen disease |
| N040A00 | rheumatoid arthritis of dip joint of finger                  | Rheumatic and collagen disease |
| N040600 | rheumatoid arthritis of distal radio-ulnar joint             | Rheumatic and collagen disease |
| N040M00 | rheumatoid arthritis of ip joint of toe                      | Rheumatic and collagen disease |
| N040L00 | rheumatoid arthritis of lesser mtp joint                     | Rheumatic and collagen disease |
| N040800 | rheumatoid arthritis of mcp joint                            | Rheumatic and collagen disease |
| N040900 | rheumatoid arthritis of pip joint of finger                  | Rheumatic and collagen disease |
| N040C00 | rheumatoid arthritis of sacro-iliac joint                    | Rheumatic and collagen disease |
| N040E00 | rheumatoid arthritis of tibio-fibular joint                  | Rheumatic and collagen disease |
| N042z00 | rheumatoid arthropathy + visceral/systemic involvement nos   | Rheumatic and collagen disease |
| H570.00 | rheumatoid lung                                              | Rheumatic and collagen disease |
| N040R00 | rheumatoid nodule                                            | Rheumatic and collagen disease |
| N100.00 | ankylosing spondylitis                                       | Rheumatic and collagen disease |
| N04..00 | rheumatoid arthritis and other inflammatory polyarthropathy  | Rheumatic and collagen disease |
| N040K00 | rheumatoid arthritis of 1st mtp joint                        | Rheumatic and collagen disease |
| N042.00 | other rheumatoid arthropathy + visceral/systemic involvement | Rheumatic and collagen disease |
| N04y300 | remitting seronegative symmetrical synovitis pitting oedema  | Rheumatic and collagen disease |
| N003.00 | dermatomyositis                                              | Rheumatic and collagen disease |
| N042100 | rheumatoid lung disease                                      | Rheumatic and collagen disease |
| N040N00 | rheumatoid vasculitis                                        | Rheumatic and collagen disease |
| N003000 | juvenile dermatomyositis                                     | Rheumatic and collagen disease |
| N001.11 | acrosclerosis                                                | Rheumatic and collagen disease |
| 9hR..00 | exception reporting: rheumatoid arthritis quality indicators | Rheumatic and collagen disease |
| 9hR0.00 | except rheumatoid arthritis quality indicator: pt unsuitable | Rheumatic and collagen disease |
| 9hR1.00 | except rheumatoid arthritis qual indicator: informed dissent | Rheumatic and collagen disease |
| N04y011 | caplan's syndrome                                            | Rheumatic and collagen disease |
| N04y000 | rheumatoid lung                                              | Rheumatic and collagen disease |
| N101.00 | spinal enthesopathy                                          | Rheumatic and collagen disease |
| N04y111 | sero negative polyarthrit                                    | Rheumatic and collagen disease |
| 66H..13 | rheumatoid arthrit. monitoring                               | Rheumatic and collagen disease |
| 66HB000 | rheumatoid arthritis annual review                           | Rheumatic and collagen disease |
| PH12.11 | sjogren - larsson syndrome                                   | Rheumatic and collagen disease |
| 9mM..00 | rheumatoid arthritis monitoring invitation                   | Rheumatic and collagen disease |
| 9mM0.00 | rheumatoid arthritis monitoring invitation first letter      | Rheumatic and collagen disease |

|         |                                                             |                                |
|---------|-------------------------------------------------------------|--------------------------------|
| 9mM1.00 | rheumatoid arthritis monitoring invitation second letter    | Rheumatic and collagen disease |
| 9mM2.00 | rheumatoid arthritis monitoring invitation third letter     | Rheumatic and collagen disease |
| 9mM3.00 | rheumatoid arthritis monitoring verbal invitation           | Rheumatic and collagen disease |
| 9mM4.00 | rheumatoid arthritis monitoring telephone invitation        | Rheumatic and collagen disease |
| N045500 | juvenile rheumatoid arthritis                               | Rheumatic and collagen disease |
| N045100 | juvenile seronegative polyarthritis                         | Rheumatic and collagen disease |
| 14G1.00 | h/o: rheumatoid arthritis                                   | Rheumatic and collagen disease |
| N04..11 | inflammatory polyarthropathy                                | Rheumatic and collagen disease |
| 388p.00 | basdai - bath ankylosing spondylitis disease activity index | Rheumatic and collagen disease |
| 38DZ000 | disease activity score 28 joint in rheumatoid arthritis     | Rheumatic and collagen disease |
| 38DZ.00 | disease activity score in rheumatoid arthritis              | Rheumatic and collagen disease |
| F371000 | polyneuropathy in disseminated lupus erythematosus          | Rheumatic and collagen disease |
| F371200 | polyneuropathy in rheumatoid arthritis                      | Rheumatic and collagen disease |
| F396100 | myopathy due to disseminated lupus erythematosus            | Rheumatic and collagen disease |
| F396400 | myopathy due to rheumatoid arthritis                        | Rheumatic and collagen disease |
| F396600 | myopathy due to scleroderma                                 | Rheumatic and collagen disease |
| F396700 | myopathy due to sjogren's disease                           | Rheumatic and collagen disease |
| F4A3200 | keratoconjunctivitis sicca (excluding sjogren's syndrome)   | Rheumatic and collagen disease |
| G5y8.00 | rheumatoid myocarditis                                      | Rheumatic and collagen disease |
| G759.00 | juvenile polyarteritis                                      | Rheumatic and collagen disease |
| H121500 | pharyngitis sicca                                           | Rheumatic and collagen disease |
| H572.00 | lung disease with systemic sclerosis                        | Rheumatic and collagen disease |
| H57y300 | lung disease with sjogren's disease                         | Rheumatic and collagen disease |
| H57y400 | lung disease with systemic lupus erythematosus              | Rheumatic and collagen disease |
| M210000 | unspecified circumscribed scleroderma                       | Rheumatic and collagen disease |
| M210.00 | circumscribed scleroderma                                   | Rheumatic and collagen disease |
| M210.11 | addison's keloid                                            | Rheumatic and collagen disease |
| M210z00 | circumscribed scleroderma nos                               | Rheumatic and collagen disease |
| N000200 | drug-induced systemic lupus erythematosus                   | Rheumatic and collagen disease |
| N000z00 | systemic lupus erythematosus nos                            | Rheumatic and collagen disease |
| N001.00 | scleroderma                                                 | Rheumatic and collagen disease |
| N001200 | systemic sclerosis induced by drugs and chemicals           | Rheumatic and collagen disease |
| N00z.00 | collagen disease nos                                        | Rheumatic and collagen disease |
| N040000 | rheumatoid arthritis of cervical spine                      | Rheumatic and collagen disease |
| N040100 | other rheumatoid arthritis of spine                         | Rheumatic and collagen disease |
| N040200 | rheumatoid arthritis of shoulder                            | Rheumatic and collagen disease |
| N040300 | rheumatoid arthritis of sternoclavicular joint              | Rheumatic and collagen disease |
| N040400 | rheumatoid arthritis of acromioclavicular joint             | Rheumatic and collagen disease |
| N040500 | rheumatoid arthritis of elbow                               | Rheumatic and collagen disease |
| N040700 | rheumatoid arthritis of wrist                               | Rheumatic and collagen disease |
| N040B00 | rheumatoid arthritis of hip                                 | Rheumatic and collagen disease |
| N040D00 | rheumatoid arthritis of knee                                | Rheumatic and collagen disease |
| N040F00 | rheumatoid arthritis of ankle                               | Rheumatic and collagen disease |
| N040G00 | rheumatoid arthritis of subtalar joint                      | Rheumatic and collagen disease |
| N040H00 | rheumatoid arthritis of talonavicular joint                 | Rheumatic and collagen disease |
| N040J00 | rheumatoid arthritis of other tarsal joint                  | Rheumatic and collagen disease |

|         |                                                             |                                |
|---------|-------------------------------------------------------------|--------------------------------|
| N040Q00 | rheumatoid bursitis                                         | Rheumatic and collagen disease |
| N040T00 | flare of rheumatoid arthritis                               | Rheumatic and collagen disease |
| N043000 | juvenile rheumatoid arthropathy unspecified                 | Rheumatic and collagen disease |
| N043300 | monarticular juvenile rheumatoid arthritis                  | Rheumatic and collagen disease |
| N043z00 | juvenile rheumatoid arthritis nos                           | Rheumatic and collagen disease |
| N045.00 | other juvenile arthritis                                    | Rheumatic and collagen disease |
| N04y.00 | other specified inflammatory polyarthropathy                | Rheumatic and collagen disease |
| N04yz00 | other specified inflammatory polyarthropathy nos            | Rheumatic and collagen disease |
| N04z.00 | inflammatory polyarthropathy nos                            | Rheumatic and collagen disease |
| N10..00 | inflammatory spondylopathies                                | Rheumatic and collagen disease |
| N102.00 | sacroiliitis nec                                            | Rheumatic and collagen disease |
| N10y.00 | other inflammatory spondylopathies                          | Rheumatic and collagen disease |
| N10y000 | inflammatory spondylopathies in diseases ec                 | Rheumatic and collagen disease |
| N10yz00 | other inflammatory spondylopathies nos                      | Rheumatic and collagen disease |
| N240.00 | rheumatism and fibrositis unspecified                       | Rheumatic and collagen disease |
| N240000 | rheumatism unspecified                                      | Rheumatic and collagen disease |
| N240200 | muscular rheumatism                                         | Rheumatic and collagen disease |
| N240700 | hand rheumatism                                             | Rheumatic and collagen disease |
| N240z00 | rheumatism or fibrositis nos                                | Rheumatic and collagen disease |
| N2y..00 | other specified nonarticular rheumatism                     | Rheumatic and collagen disease |
| N2z..00 | nonarticular rheumatism nos                                 | Rheumatic and collagen disease |
| Nyu1.00 | [x]inflammatory polyarthropathies                           | Rheumatic and collagen disease |
| Nyu1100 | [x]other seropositive rheumatoid arthritis                  | Rheumatic and collagen disease |
| Nyu1200 | [x]other specified rheumatoid arthritis                     | Rheumatic and collagen disease |
| Nyu1G00 | [x]seropositive rheumatoid arthritis, unspecified           | Rheumatic and collagen disease |
| Nyu4300 | [x]other forms of systemic lupus erythematosus              | Rheumatic and collagen disease |
| Nyu4400 | [x]other dermatomyositis                                    | Rheumatic and collagen disease |
| Nyu4500 | [x]other forms of systemic sclerosis                        | Rheumatic and collagen disease |
| Nyu4E00 | [x]dermatopolymyositis, unspecified                         | Rheumatic and collagen disease |
| Nyu6.00 | [x]spondylopathies                                          | Rheumatic and collagen disease |
| Nyu6100 | [x]other specified inflammatory spondylopathies             | Rheumatic and collagen disease |
| Nyu6500 | [x]other specified spondylopathies                          | Rheumatic and collagen disease |
| K0J0.00 | renal involvement in scleroderma                            | Rheumatic and collagen disease |
| K0H..00 | acute scleroderma renal crisis                              | Rheumatic and collagen disease |
| N040P00 | seronegative rheumatoid arthritis                           | Rheumatic and collagen disease |
| N045000 | juvenile ankylosing spondylitis                             | Rheumatic and collagen disease |
| N00y.11 | fibrosclerosis - systemic                                   | Rheumatic and collagen disease |
| N003100 | dermatopolymyositis in neoplastic disease                   | Rheumatic and collagen disease |
| N200.00 | giant cell arteritis with polymyalgia rheumatica            | Rheumatic and collagen disease |
| 7P20300 | delivery of rehabilitation for rheumatoid arthritis         | Rheumatic and collagen disease |
| N060.11 | endemic polyarthritits                                      | Rheumatic and collagen disease |
| M210400 | linear scleroderma                                          | Rheumatic and collagen disease |
| N042000 | rheumatic carditis                                          | Rheumatic and collagen disease |
| N00y.00 | other specified diffuse collagen diseases                   | Rheumatic and collagen disease |
| Nyu1000 | [x]rheumatoid arthritis+involvement/other organs or systems | Rheumatic and collagen disease |
| N040S00 | rheumatoid arthritis - multiple joint                       | Rheumatic and collagen disease |

|         |                                                         |                                |
|---------|---------------------------------------------------------|--------------------------------|
| N002.11 | keratoconjunctivitis sicca                              | Rheumatic and collagen disease |
| N047.00 | seropositive erosive rheumatoid arthritis               | Rheumatic and collagen disease |
| N000400 | systemic lupus erythematosus with pericarditis          | Rheumatic and collagen disease |
| N005.00 | adult still's disease                                   | Rheumatic and collagen disease |
| N04y200 | adult-onset still's disease                             | Rheumatic and collagen disease |
| G5yA.00 | rheumatoid carditis                                     | Rheumatic and collagen disease |
| N042200 | rheumatoid nodule                                       | Rheumatic and collagen disease |
| N000100 | libman-sacks disease                                    | Rheumatic and collagen disease |
| N045600 | pauciarticular onset juvenile chronic arthritis         | Rheumatic and collagen disease |
| N004.00 | polymyositis                                            | Rheumatic and collagen disease |
| N001100 | crest syndrome                                          | Rheumatic and collagen disease |
| N044.00 | chronic post-rheumatic arthropathy                      | Rheumatic and collagen disease |
| N00..11 | collagen diseases                                       | Rheumatic and collagen disease |
| N003X00 | dermatopolymyositis, unspecified                        | Rheumatic and collagen disease |
| N044.12 | nodular fibrositis of chronic rheumatic disease         | Rheumatic and collagen disease |
| K01x400 | nephrotic syndrome in systemic lupus erythematosus      | Rheumatic and collagen disease |
| N231400 | polymyositis ossificans                                 | Rheumatic and collagen disease |
| N043.00 | juvenile rheumatoid arthritis - still's disease         | Rheumatic and collagen disease |
| F37X.00 | inflammatory polyneuropathy, unspecified                | Rheumatic and collagen disease |
| N000.00 | systemic lupus erythematosus                            | Rheumatic and collagen disease |
| N000000 | disseminated lupus erythematosus                        | Rheumatic and collagen disease |
| N041.00 | felty's syndrome                                        | Rheumatic and collagen disease |
| H160400 | laryngitis sicca                                        | Rheumatic and collagen disease |
| ZRq8.11 | slam - systemic lupus activity measure                  | Rheumatic and collagen disease |
| 7179PR  | polymyalgia rheumatica                                  | Rheumatic and collagen disease |
| 7161    | polymyositis                                            | Rheumatic and collagen disease |
| 7340A   | scleroderma                                             | Rheumatic and collagen disease |
| ZRq9.00 | systemic lupus erythematosus disease activity index     | Rheumatic and collagen disease |
| ZRq8.00 | systemic lupus activity measure                         | Rheumatic and collagen disease |
| 7340BA  | acrosclerosis                                           | Rheumatic and collagen disease |
| 6954    | systemic lupus erythematosus                            | Rheumatic and collagen disease |
| 7123    | rheumatoid arthritis                                    | Rheumatic and collagen disease |
| 7919y00 | therapeutic transluminal operation on heart valve os    | Valvular disease               |
| 7919.00 | therapeutic transluminal operations on valve of heart   | Valvular disease               |
| A932.00 | syphilitic endocarditis                                 | Valvular disease               |
| G541600 | aortic valve sclerosis                                  | Valvular disease               |
| P722400 | supra-valvular aortic stenosis                          | Valvular disease               |
| G120.00 | rheumatic aortic stenosis                               | Valvular disease               |
| P641.00 | bicuspid aortic valve                                   | Valvular disease               |
| G140412 | tricuspid incompetence, cause unspecified               | Valvular disease               |
| G140413 | tricuspid regurgitation, cause unspecified              | Valvular disease               |
| G140514 | tricuspid stenosis and regurgitation, cause unspecified | Valvular disease               |
| G541212 | aortic regurgitation alone, cause unspecified           | Valvular disease               |
| G543215 | pulmonary regurgitation, cause unspecified              | Valvular disease               |
| G54z014 | insufficiency of unspecified heart valve                | Valvular disease               |
| G54z013 | regurgitation of unspecified heart valve                | Valvular disease               |

|         |                                                              |                  |
|---------|--------------------------------------------------------------|------------------|
| G111.11 | mitral incompetence - rheumatic                              | Valvular disease |
| P611.00 | congenital tricuspid stenosis                                | Valvular disease |
| G541500 | aortic stenosis                                              | Valvular disease |
| G140112 | tricuspid incompetence - rheumatic                           | Valvular disease |
| G140100 | rheumatic tricuspid insufficiency                            | Valvular disease |
| G110.00 | mitral stenosis                                              | Valvular disease |
| P651.00 | fused commissure of the mitral valve                         | Valvular disease |
| 7914212 | starr prosthetic replacement of valve of heart               | Valvular disease |
| P65..00 | congenital mitral stenosis                                   | Valvular disease |
| Gy0..00 | cardiovascular syphilis                                      | Valvular disease |
| G110.11 | rheumatic mitral stenosis                                    | Valvular disease |
| 7913.12 | replacement of pulmonary valve                               | Valvular disease |
| 7910.11 | mitral valvuloplasty                                         | Valvular disease |
| G141200 | rheumatic pulmonary stenosis and insufficiency               | Valvular disease |
| 7919500 | percutaneous transluminal pulmonary valve perfor dilation    | Valvular disease |
| 791D.00 | excision of valve of heart                                   | Valvular disease |
| 7N40400 | [so]truncal valve                                            | Valvular disease |
| G114.00 | ruptured mitral valve cusp                                   | Valvular disease |
| G141000 | rheumatic pulmonary stenosis                                 | Valvular disease |
| G140000 | rheumatic tricuspid stenosis                                 | Valvular disease |
| G14z.11 | rheumatic valvulitis, chronic nos                            | Valvular disease |
| G54z500 | valvular heart disease                                       | Valvular disease |
| 7911500 | transapical aortic valve implantation                        | Valvular disease |
| 7911600 | transluminal aortic valve implantation                       | Valvular disease |
| 791A300 | repair of supraaortic stenosis                               | Valvular disease |
| 791A.00 | remove obstruction from structure adjacent to valve of heart | Valvular disease |
| 791Ay00 | removal of obstruction from struct adjacent heart valve os   | Valvular disease |
| G543300 | pulmonary stenosis, cause unspecified                        | Valvular disease |
| P60..00 | pulmonary valve anomalies                                    | Valvular disease |
| G543.00 | pulmonary valve disorders                                    | Valvular disease |
| 7911200 | prosthetic replacement of aortic valve                       | Valvular disease |
| 7910200 | prosthetic replacement of mitral valve                       | Valvular disease |
| 7913200 | prosthetic replacement of pulmonary valve                    | Valvular disease |
| 7912200 | prosthetic replacement of tricuspid valve                    | Valvular disease |
| G12..00 | rheumatic aortic valve disease                               | Valvular disease |
| G11..00 | mitral valve diseases                                        | Valvular disease |
| G540200 | mitral valve prolapse                                        | Valvular disease |
| P652.00 | parachute deformity of the mitral valve                      | Valvular disease |
| 14S4.00 | h/o: heart valve recipient                                   | Valvular disease |
| 14T3.00 | h/o: artificial heart valve                                  | Valvular disease |
| P60z000 | congenital insufficiency of the pulmonary valve              | Valvular disease |
| 7912.12 | tricuspid valvuloplasty                                      | Valvular disease |
| 24D5.00 | o/e - aortic systolic murmur                                 | Valvular disease |
| 24D6.00 | o/e - aortic diastolic murmur                                | Valvular disease |
| 24D7.00 | o/e -pulmonary systolic murmur                               | Valvular disease |
| 24D8.00 | o/e-pulmonary diastolic murmur                               | Valvular disease |

|         |                                                              |                  |
|---------|--------------------------------------------------------------|------------------|
| 24D9.00 | o/e - tricuspid murmur                                       | Valvular disease |
| 7902500 | repair of tetralogy of fallot with absent pulmonary valve    | Valvular disease |
| 790D700 | replacement of valved cardiac conduit                        | Valvular disease |
| 791C500 | aortoventriculoplasty with pulmonary valve autograft         | Valvular disease |
| 790Dy00 | other specified creation of valved cardiac conduit           | Valvular disease |
| 791..00 | valves of heart and adjacent structures operations           | Valvular disease |
| 7910300 | replacement of mitral valve nec                              | Valvular disease |
| 7910400 | mitral valvuloplasty nec                                     | Valvular disease |
| 7910y00 | other specified plastic repair of mitral valve               | Valvular disease |
| 7910z00 | plastic repair of mitral valve nos                           | Valvular disease |
| 7911000 | allograft replacement of aortic valve                        | Valvular disease |
| 7911300 | replacement of aortic valve nec                              | Valvular disease |
| 7911y00 | other specified plastic repair of aortic valve               | Valvular disease |
| 7911z00 | plastic repair of aortic valve nos                           | Valvular disease |
| 7912300 | replacement of tricuspid valve nec                           | Valvular disease |
| 7912500 | tricuspid valvuloplasty nec                                  | Valvular disease |
| 7912y00 | other specified plastic repair of tricuspid valve            | Valvular disease |
| 7912z00 | plastic repair of tricuspid valve nos                        | Valvular disease |
| 7913300 | replacement of pulmonary valve nec                           | Valvular disease |
| 7913y00 | other specified plastic repair of pulmonary valve            | Valvular disease |
| 7913z00 | plastic repair of pulmonary valve nos                        | Valvular disease |
| 7914000 | allograft replacement of valve of heart nec                  | Valvular disease |
| 7914100 | xenograft replacement of valve of heart nec                  | Valvular disease |
| 7914300 | replacement of valve of heart nec                            | Valvular disease |
| 7914y00 | other specified plastic repair of unspecified valve of heart | Valvular disease |
| 7914z00 | plastic repair of unspecified valve of heart nos             | Valvular disease |
| 7915.00 | revision of plastic repair of valve of heart                 | Valvular disease |
| 7915000 | revision of plastic repair of mitral valve                   | Valvular disease |
| 7915100 | revision of plastic repair of aortic valve                   | Valvular disease |
| 7915200 | revision of plastic repair of tricuspid valve                | Valvular disease |
| 7915300 | revision of plastic repair of pulmonary valve                | Valvular disease |
| 7915y00 | other specified revision of plastic repair of valve of heart | Valvular disease |
| 7915z00 | revision of plastic repair of valve of heart nos             | Valvular disease |
| 7916.00 | open incision of heart valve                                 | Valvular disease |
| 7916000 | open mitral valvotomy                                        | Valvular disease |
| 7916200 | open tricuspid valvotomy                                     | Valvular disease |
| 7916y00 | other specified open specified incision of valve of heart    | Valvular disease |
| 7917.00 | closed incision of heart valve                               | Valvular disease |
| 7917y00 | other specified closed incision of valve of heart            | Valvular disease |
| 7917z00 | closed incision of valve of heart nos                        | Valvular disease |
| 7918.00 | other open operations on valve of heart                      | Valvular disease |
| 7918000 | annuloplasty of mitral valve                                 | Valvular disease |
| 7918200 | annuloplasty of valve of heart nec                           | Valvular disease |
| 7918300 | excision of vegetations of valve of heart                    | Valvular disease |
| 7918y00 | other specified other open operation on valve of heart       | Valvular disease |
| 7918z00 | other open operation on valve of heart nos                   | Valvular disease |



|         |                                                          |                  |
|---------|----------------------------------------------------------|------------------|
| 7919000 | percutaneous transluminal mitral valvotomy               | Valvular disease |
| 7919200 | percutaneous transluminal tricuspid valvotomy            | Valvular disease |
| 7919z00 | therapeutic transluminal operation on heart valve nos    | Valvular disease |
| 791A200 | repair of subaortic stenosis                             | Valvular disease |
| 791B.00 | other operations on structure adjacent to valve of heart | Valvular disease |
| 791z.00 | heart valve and adjacent structures operations nos       | Valvular disease |
| 7931000 | inspection of valve of heart                             | Valvular disease |
| 7A65100 | interposition of valve of vein                           | Valvular disease |
| 7A65y00 | other specified repair of valve of vein                  | Valvular disease |
| A932100 | syphilitic endocarditis of mitral valve                  | Valvular disease |
| A932300 | syphilitic endocarditis of tricuspid valve               | Valvular disease |
| G542X00 | nonrheumatic tricuspid valve disorder, unspecified       | Valvular disease |
| G542200 | nonrheumatic tricuspid valve stenosis with insufficiency | Valvular disease |
| G112.00 | mitral stenosis with insufficiency                       | Valvular disease |
| G112.13 | mitral stenosis with regurgitation                       | Valvular disease |
| G112.12 | mitral stenosis with incompetence                        | Valvular disease |
| G11z.00 | mitral valve disease nos                                 | Valvular disease |
| G12z.00 | rheumatic aortic valve disease nos                       | Valvular disease |
| G13..00 | diseases of mitral and aortic valves                     | Valvular disease |
| G130.00 | mitral and aortic stenosis                               | Valvular disease |
| G131.00 | mitral stenosis and aortic insufficiency                 | Valvular disease |
| G131.14 | mitral stenosis and aortic regurgitation                 | Valvular disease |
| G131.13 | mitral stenosis and aortic incompetence                  | Valvular disease |
| G132.12 | mitral incompetence and aortic stenosis                  | Valvular disease |
| G132.13 | mitral regurgitation and aortic stenosis                 | Valvular disease |
| G132.00 | mitral insufficiency and aortic stenosis                 | Valvular disease |
| G133.00 | mitral and aortic incompetence                           | Valvular disease |
| G133.11 | mitral and aortic insufficiency                          | Valvular disease |
| G133.12 | mitral and aortic regurgitation                          | Valvular disease |
| G13y.00 | multiple mitral and aortic valve involvement             | Valvular disease |
| G13z.00 | mitral and aortic valve disease nos                      | Valvular disease |
| G140.00 | tricuspid valve disease nec                              | Valvular disease |
| G14021Y | rheumatic tricuspid stenosis and incompetence            | Valvular disease |
| G14021X | rheumatic tricuspid stenosis and regurgitation           | Valvular disease |
| G140200 | rheumatic tricuspid stenosis and insufficiency           | Valvular disease |
| G140300 | tricuspid stenosis, cause unspecified                    | Valvular disease |
| G140400 | tricuspid insufficiency, cause unspecified               | Valvular disease |
| G140500 | tricuspid stenosis and insufficiency, cause unspecified  | Valvular disease |
| G140z00 | rheumatic tricuspid valve disease nos                    | Valvular disease |
| G141z00 | rheumatic pulmonary valve disease nos                    | Valvular disease |
| G540000 | mitral incompetence, non-rheumatic                       | Valvular disease |
| G540100 | mitral incompetence, cause unspecified                   | Valvular disease |
| G540z00 | mitral valve disorders nos                               | Valvular disease |
| G541012 | aortic regurgitation, non-rheumatic                      | Valvular disease |
| G541100 | aortic stenosis, non-rheumatic                           | Valvular disease |
| G541300 | aortic stenosis alone, cause unspecified                 | Valvular disease |

|         |                                                            |                  |
|---------|------------------------------------------------------------|------------------|
| G541400 | aortic valve stenosis with insufficiency                   | Valvular disease |
| G541z00 | aortic valve disorders nos                                 | Valvular disease |
| G542.00 | tricuspid valve disorders, non-rheumatic                   | Valvular disease |
| G542000 | tricuspid incompetence, non-rheumatic                      | Valvular disease |
| G542011 | tricuspid insufficiency, non-rheumatic                     | Valvular disease |
| G542012 | tricuspid regurgitation, non-rheumatic                     | Valvular disease |
| G542100 | tricuspid stenosis, non-rheumatic                          | Valvular disease |
| G542z00 | tricuspid valve disorders nos                              | Valvular disease |
| G543012 | pulmonary regurgitation, non-rheumatic                     | Valvular disease |
| G543100 | pulmonary stenosis, non-rheumatic                          | Valvular disease |
| G543311 | pulmonary stenosis, cause unspecified                      | Valvular disease |
| G543400 | pulmonary valve stenosis with insufficiency                | Valvular disease |
| G543z00 | pulmonary valve disorders nos                              | Valvular disease |
| G544000 | disorders of both aortic and tricuspid valves              | Valvular disease |
| G544100 | disorders of both mitral and tricuspid valves              | Valvular disease |
| G544200 | combined disorders of mitral, aortic and tricuspid valves  | Valvular disease |
| G54z.00 | endocarditis, valve unspecified                            | Valvular disease |
| G54z000 | incompetence of unspecified heart valve                    | Valvular disease |
| G54z100 | stenosis of unspecified heart valve                        | Valvular disease |
| G54z300 | endocarditis, valve unspecified, os                        | Valvular disease |
| G54zz00 | endocarditis, valve unspecified, nos                       | Valvular disease |
| G122.00 | rheumatic aortic stenosis with insufficiency               | Valvular disease |
| Gyu1000 | [x]other mitral valve diseases                             | Valvular disease |
| Gyu1100 | [x]other rheumatic aortic valve diseases                   | Valvular disease |
| Gyu1200 | [x]other tricuspid valve diseases                          | Valvular disease |
| Gyu5600 | [x]other aortic valve disorders                            | Valvular disease |
| Gyu5800 | [x]other pulmonary valve disorders                         | Valvular disease |
| Gyu5A00 | [x]aortic valve disorders in diseases classified elsewhere | Valvular disease |
| P600.00 | pulmonary valve anomaly, unspecified                       | Valvular disease |
| P601.00 | congenital atresia of the pulmonary valve                  | Valvular disease |
| P601000 | hypoplasia of pulmonary valve                              | Valvular disease |
| P601z00 | congenital atresia of pulmonary valve nos                  | Valvular disease |
| P602100 | congenital fusion of pulmonary valve segment               | Valvular disease |
| P602z00 | congenital pulmonary stenosis nos                          | Valvular disease |
| P60z.00 | other pulmonary valve anomalies                            | Valvular disease |
| P60zz00 | other pulmonary valve anomaly nos                          | Valvular disease |
| P61..00 | congenital tricuspid atresia and stenosis                  | Valvular disease |
| P61z.00 | congenital tricuspid atresia or stenosis nos               | Valvular disease |
| P640.00 | congenital aortic valve insufficiency, unspecified         | Valvular disease |
| P64z.00 | congenital aortic valve insufficiency nos                  | Valvular disease |
| P650.00 | congenital mitral stenosis, unspecified                    | Valvular disease |
| P65z.00 | congenital mitral stenosis nos                             | Valvular disease |
| P6y0.00 | subaortic stenosis                                         | Valvular disease |
| P6yy700 | atresia of heart valve nec                                 | Valvular disease |
| P6yyC00 | fusion of mitral valve cusps                               | Valvular disease |
| P6z0.00 | unspecified anomaly of heart valve                         | Valvular disease |

|         |                                                             |                  |
|---------|-------------------------------------------------------------|------------------|
| G141.00 | rheumatic pulmonary valve disease                           | Valvular disease |
| Pyu2200 | [x]other congenital malformations of pulmonary valve        | Valvular disease |
| Pyu2G00 | [x]congenital malformation of tricuspid valve, unspecified  | Valvular disease |
| 7N40100 | [so]aortic valve                                            | Valvular disease |
| SP00200 | mechanical complication of heart valve prosthesis           | Valvular disease |
| 7N40000 | [so]mitral valve                                            | Valvular disease |
| 7N40300 | [so]pulmonary valve                                         | Valvular disease |
| 7N40200 | [so]tricuspid valve                                         | Valvular disease |
| 7N40.00 | [so]valve of heart                                          | Valvular disease |
| 7N40z00 | [so]valve of heart nec                                      | Valvular disease |
| 7910212 | bjork-shiley prosthetic replacement of mitral valve         | Valvular disease |
| 7918111 | de vega tricuspid annuloplasty                              | Valvular disease |
| 7918400 | closure of tricuspid valve                                  | Valvular disease |
| 791D000 | tricuspid valvectomy                                        | Valvular disease |
| 7918500 | closure of pulmonary valve                                  | Valvular disease |
| 791D100 | pulmonary valvectomy                                        | Valvular disease |
| 7914600 | replacement of truncal valve                                | Valvular disease |
| A932.11 | syphilitic valve disease                                    | Valvular disease |
| 7914500 | truncal valve repair                                        | Valvular disease |
| 791B200 | operations on mitral subvalvar apparatus                    | Valvular disease |
| 791Dy00 | other specified excision of valve of heart                  | Valvular disease |
| 7919600 | percutaneous transluminal pulmonary valve replacement       | Valvular disease |
| SyuK611 | [x] embolism from prosthetic heart valve                    | Valvular disease |
| Pyu2H00 | [x]congenital malformation of aortic and mitral valves unsp | Valvular disease |
| G541700 | aortic valve calcification                                  | Valvular disease |
| G540300 | mitral valve leaf prolapse                                  | Valvular disease |
| 24G..00 | aortic valve gradient                                       | Valvular disease |
| P711.13 | preductal aortic stenosis                                   | Valvular disease |
| P712.13 | postductal aortic stenosis                                  | Valvular disease |
| 7910.00 | plastic repair of mitral valve                              | Valvular disease |
| 7911.00 | plastic repair of aortic valve                              | Valvular disease |
| 7912.00 | plastic repair of tricuspid valve                           | Valvular disease |
| 7913.00 | plastic repair of pulmonary valve                           | Valvular disease |
| 7914.00 | plastic repair of unspecified valve of heart                | Valvular disease |
| 7914200 | prosthetic replacement of valve of heart nec                | Valvular disease |
| 7916z00 | open incision of valve of heart nos                         | Valvular disease |
| 7918100 | annuloplasty of tricuspid valve                             | Valvular disease |
| Gyu5D00 | [x]multiple valve disorders/diseases ce                     | Valvular disease |
| 7914.11 | replacement of unspecified valve of heart                   | Valvular disease |
| 24D..11 | o/e - aortic murmur                                         | Valvular disease |
| 24D..15 | o/e - pulmonary murmur                                      | Valvular disease |
| Gyu5500 | [x]other nonrheumatic mitral valve disorders                | Valvular disease |
| A932200 | syphilitic endocarditis of aortic valve                     | Valvular disease |
| 7912.11 | replacement of tricuspid valve                              | Valvular disease |
| 7911.12 | replacement of aortic valve                                 | Valvular disease |
| ZV42200 | [v]heart valve transplanted                                 | Valvular disease |

|         |                                                              |                  |
|---------|--------------------------------------------------------------|------------------|
| ZV43300 | [v]has artificial heart valve                                | Valvular disease |
| ZV45H00 | [v]presence of prosthetic heart valve                        | Valvular disease |
| ZVu6e00 | [x]presence of other heart valve replacement                 | Valvular disease |
| 7911411 | aortic valve repair nec                                      | Valvular disease |
| 7912511 | tricuspid valve repair nec                                   | Valvular disease |
| 7910411 | mitral valve repair nec                                      | Valvular disease |
| 7913411 | pulmonary valve repair nec                                   | Valvular disease |
| 7914411 | repair of valve of heart nec                                 | Valvular disease |
| 7917200 | closed tricuspid valvotomy                                   | Valvular disease |
| 7910000 | allograft replacement of mitral valve                        | Valvular disease |
| 7913000 | allograft replacement of pulmonary valve                     | Valvular disease |
| 7912000 | allograft replacement of tricuspid valve                     | Valvular disease |
| G121.12 | aortic regurgitation - rheumatic                             | Valvular disease |
| G541.00 | aortic valve disorders                                       | Valvular disease |
| 7917000 | closed mitral valvotomy                                      | Valvular disease |
| P66..00 | congenital mitral insufficiency                              | Valvular disease |
| G11..11 | rheumatic mitral valve disease                               | Valvular disease |
| 7910211 | bjork-shiley prosthetic replacement of mitral valve          | Valvular disease |
| G111.00 | rheumatic mitral insufficiency                               | Valvular disease |
| A93..00 | cardiovascular syphilis                                      | Valvular disease |
| 7910213 | carpentier prosthetic replacement of mitral valve            | Valvular disease |
| 7911100 | xenograft replacement of aortic valve                        | Valvular disease |
| 7910100 | xenograft replacement of mitral valve                        | Valvular disease |
| 7913100 | xenograft replacement of pulmonary valve                     | Valvular disease |
| 7912100 | xenograft replacement of tricuspid valve                     | Valvular disease |
| P64..00 | congenital aortic valve insufficiency                        | Valvular disease |
| P63..00 | congenital aortic valve stenosis                             | Valvular disease |
| P6W..00 | congenital malformation of aortic and mitral valves unsp     | Valvular disease |
| P6X..00 | congenital malformation of tricuspid valve, unspecified      | Valvular disease |
| P602.00 | congenital pulmonary stenosis                                | Valvular disease |
| G113.00 | nonrheumatic mitral valve stenosis                           | Valvular disease |
| P610.00 | congenital tricuspid atresia                                 | Valvular disease |
| 7902000 | correct fallot tetralogy- valved right ventr outflow conduit | Valvular disease |
| 790D300 | creation of valved conduit between left ventricle and aorta  | Valvular disease |
| 32A3.00 | ecg: p mitrale                                               | Valvular disease |
| 7910214 | edwards prosthetic replacement of mitral valve               | Valvular disease |
| 7914211 | edwards prosthetic replacement of valve of heart             | Valvular disease |
| G544X00 | multiple valve disease, unspecified                          | Valvular disease |
| G544.00 | multiple valve diseases                                      | Valvular disease |
| G111.12 | mitral regurgitation - rheumatic                             | Valvular disease |
| G540.15 | mitral valve prolapse                                        | Valvular disease |
| SP00400 | infect and inflammatory reaction due to cardiac valve pros   | Valvular disease |
| TB01200 | implant of heart valve prosthesis + complication, no blame   | Valvular disease |
| P6yy.11 | hypoplastic aortic orifice or valve                          | Valvular disease |
| G540.14 | mitral valve regurgitation                                   | Valvular disease |
| G540.00 | mitral valve incompetence                                    | Valvular disease |

|         |                                                  |                  |
|---------|--------------------------------------------------|------------------|
| G540.12 | mitral valve insufficiency                       | Valvular disease |
| G540.16 | mitral regurgitation                             | Valvular disease |
| G54..11 | heart valve disorders - non rheumatic            | Valvular disease |
| 791y.00 | heart valve or adjacent structures operations os | Valvular disease |
| G140111 | tricuspid regurgitation - rheumatic              | Valvular disease |
| 7910.12 | replacement of mitral valve                      | Valvular disease |

**Additional EMIS codes**

|                | <b>Term</b>                                                      | <b>Group</b> |
|----------------|------------------------------------------------------------------|--------------|
| JHCAS1         | asthma causes daytime asthma symptoms less than weekly           | Asthma       |
| JHCAS2         | asthma causes daytime symptoms more than weekly, less than daily | Asthma       |
| JHCAS3         | asthma causes daytime asthma symptoms daily                      | Asthma       |
| JHCAS4         | asthma causes night time symptoms less than 2 times per month    | Asthma       |
| JHCAS5         | asthma causes night time symp more than 2 times a month,not wkly | Asthma       |
| JHCAS6         | asthma causes night time asthma symptoms weekly or more often    | Asthma       |
| JHCFR1         | frequent night time asthma symptoms                              | Asthma       |
| JHCIN17        | infrequent asthma exacerbations                                  | Asthma       |
| JHCFR2         | frequent asthma exacerbations                                    | Asthma       |
| EMISNQAS34     | asthma monitoring in primary care                                | Asthma       |
| EMISNQAS35     | asthma monitoring in secondary care                              | Asthma       |
| EMISNQDA36     | date of asthma diagnosis                                         | Asthma       |
| EMISNQAS41     | asthma clinical management plan no longer in place               | Asthma       |
| EMISNQNO108    | no change in asthma management plan                              | Asthma       |
| EMISNQAC840    | access to online patient asthma education given                  | Asthma       |
| EMISNQAC876    | acute infective exacerbation of asthma                           | Asthma       |
| ESCTAS6        | asthma trigger - perfume                                         | Asthma       |
| EMISASC1       | asthma stable < 3 months                                         | Asthma       |
| EMISASC2       | asthma stable > 3 months                                         | Asthma       |
| EMISASC3       | asthma control unsatisfactory                                    | Asthma       |
| HNG0606        | [rfc] asthma                                                     | Asthma       |
| EGTON2B        | cause of death- malignant neoplasms                              | Cancer       |
| EGTON2EGTON203 | cause of death- carcinoma of oesophagus                          | Cancer       |
| EMISNQMA24     | malignant melanoma of the ciliary body                           | Cancer       |
| EMISNQMA25     | malignant melanoma of choroid                                    | Cancer       |
| EMISNQMA27     | malignant melanoma of iris                                       | Cancer       |
| EMISNQHA31     | has cancer key worker                                            | Cancer       |
| EMISNQHE41     | hereditary nonpolyposis colon cancer                             | Cancer       |
| EMISNQLY4      | lymphangiomatosis                                                | Cancer       |
| EMISNQCA85     | carcinoid tumour of lung                                         | Cancer       |
| EMISNQPR69     | primary malignant neoplasm of lung                               | Cancer       |
| EMISNQSM10     | small cell lung cancer                                           | Cancer       |
| EMISNQNO51     | non-small cell lung cancer                                       | Cancer       |
| EMISNQSQ1      | squamous cell carcinoma of lung                                  | Cancer       |
| EMISNQAD45     | adenocarcinoma of lung                                           | Cancer       |
| EMISNQLA74     | large cell carcinoma of lung                                     | Cancer       |
| EMISNQTU10     | tumour stage finding                                             | Cancer       |
| EMISNQME40     | metastasis stage finding                                         | Cancer       |

|              |                                                                                    |        |
|--------------|------------------------------------------------------------------------------------|--------|
| EMISNQTU11   | tumour stage t1a                                                                   | Cancer |
| EMISNQTU12   | tumour stage t1b                                                                   | Cancer |
| EMISNQTU13   | tumour stage t2a                                                                   | Cancer |
| EMISNQTU14   | tumour stage t2b                                                                   | Cancer |
| EMISNQTU15   | tumour stage t3a                                                                   | Cancer |
| EMISNQTU16   | tumour stage t3b                                                                   | Cancer |
| EMISNQTU17   | tumour stage t4                                                                    | Cancer |
| EMISNQME41   | metastasis stage m0                                                                | Cancer |
| EMISNQME42   | metastasis stage m1                                                                | Cancer |
| EMISNQME43   | metastasis stage m2                                                                | Cancer |
| EMISNQME44   | metastasis stage m3                                                                | Cancer |
| EMISNQME45   | metastasis stage m4                                                                | Cancer |
| EMISNQME46   | metastasis stage m1a                                                               | Cancer |
| EMISNQME47   | metastasis stage m1b                                                               | Cancer |
| EMISNQME48   | metastasis stage m1c                                                               | Cancer |
| JHCMA19      | malignant neoplasm of skin                                                         | Cancer |
| EMISNQCA974  | cancer follow up - enhanced services administration                                | Cancer |
| EMISNQBR35   | breast cancer follow up - enhanced services administration                         | Cancer |
| EMISNQPR149  | prostate cancer follow up - enhanced services administration                       | Cancer |
| EMISNQRE382  | referral by lung cancer nurse specialist                                           | Cancer |
| EMISNQCA1045 | cancer care plan given no longer in place                                          | Cancer |
| EMISNQEX43   | extended consultation for cancer                                                   | Cancer |
| EMISNQEX44   | extended consultation for cancer declined                                          | Cancer |
| EMISNQHI51   | history of malignant tumour of pelvis                                              | Cancer |
| EMISNQME101  | [m]metaplastic melanoma                                                            | Cancer |
| EMISNQFI39   | first definitive treatment for a new primary cancer                                | Cancer |
| EMISNQFI40   | first treatment for metastatic disease following an unknown primary                | Cancer |
| EMISNQSE135  | second or subsequent treatment for a new primary cancer                            | Cancer |
| EMISNQSE136  | second or subsequent treatment for metastatic disease following an unknown primary | Cancer |
| EMISNQTR67   | treatment for a local recurrence of a primary cancer                               | Cancer |
| EMISNQTR68   | treatment for a regional recurrence of cancer                                      | Cancer |
| EMISNQTR69   | treatment for a distant recurrence of cancer (metastatic disease)                  | Cancer |
| EMISNQTR70   | treatment for relapse of primary cancer (second or subsequent)                     | Cancer |
| EMISNQTR71   | treatment for progression of primary cancer (second or subsequent)                 | Cancer |
| EMISNQTR72   | treatment for multiple recurrence of cancer (local and/or regional and/or distant) | Cancer |
| 142D         | h/o: malignant neoplasm of vulva                                                   | Cancer |
| 142E         | h/o: malignant neoplasm of cervix                                                  | Cancer |
| 142F         | h/o: malignant neoplasm of uterine body                                            | Cancer |
| 142G         | h/o: malignant neoplasm of ovary                                                   | Cancer |
| 8Hgg0        | discharge from secondary care breast cancer service                                | Cancer |
| 8Hgg1        | discharge from secondary care colorectal cancer service                            | Cancer |
| 8Hgg2        | discharge from secondary care prostate cancer service                              | Cancer |
| G8614        | lymphoedema following cancer                                                       | Cancer |
| G8615        | lymphoedema following breast cancer                                                | Cancer |
| EGTON299     | non hodgkin lymphoma                                                               | Cancer |

|               |                                                                  |                         |
|---------------|------------------------------------------------------------------|-------------------------|
| EGTON83       | excision melanoma                                                | Cancer                  |
| HNG0200       | [rfc] cancer of the prostate                                     | Cancer                  |
| HNG0201       | [rfc] cancer of the rectum                                       | Cancer                  |
| HNG0202       | [rfc] cancer of the testes                                       | Cancer                  |
| HNG0203       | [rfc] cancer of the ovary                                        | Cancer                  |
| HNG0204       | [rfc] cancer of the uterus                                       | Cancer                  |
| HNG0205       | [rfc] cancer of the cervix                                       | Cancer                  |
| HNG0207       | [rfc] lung cancer                                                | Cancer                  |
| HNG0208       | [rfc] cancer of the larynx                                       | Cancer                  |
| HNG0182       | [rfc] neoplasm                                                   | Cancer                  |
| HNG0189       | [rfc] bowel cancer                                               | Cancer                  |
| HNG0190       | [rfc] breast cancer                                              | Cancer                  |
| HNG0191       | [rfc] cancer of the thyroid                                      | Cancer                  |
| HNG0193       | [rfc] cancer of the stomach                                      | Cancer                  |
| HNG0194       | [rfc] liver cancer                                               | Cancer                  |
| HNG0196       | [rfc] cancer of the mouth                                        | Cancer                  |
| HNG0199       | [rfc] neoplasm                                                   | Cancer                  |
| HNG0600       | [rfc] cancer                                                     | Cancer                  |
| HNGNQRF58     | [rfc] malignant wound                                            | Cancer                  |
| EMISNQCA31    | cancer medication review                                         | Cancer                  |
| EMISNQCA33    | cancer review invite 1                                           | Cancer                  |
| EMISNQRE38    | recurrence of cancer confirmed                                   | Cancer                  |
| ALLERGY2.3    | adverse reaction to anti-arrhythmic drugs                        | Cardiac arrythmia       |
| EMISNQST5     | stopping implantable cardiac defib. (icd) discussed with patient | Cardiac arrythmia       |
| EMISNQAT22    | atrial fibrillation confirmed                                    | Cardiac arrythmia       |
| EMISNQAT24    | atrial fibrillation clinical pathway protocol not followed       | Cardiac arrythmia       |
| EMISNQAT28    | atrial fibrillation monitoring in primary care                   | Cardiac arrythmia       |
| EMISNQAT29    | atrial fibrillation monitoring in secondary care                 | Cardiac arrythmia       |
| EMISNQAT30    | atrial fibrillation follow-up                                    | Cardiac arrythmia       |
| ZV45W         | implantable cardiac electronic device in situ                    | Cardiac arrythmia       |
| EMISNQAF6     | af screen using handheld ecg monitor with af detector abnormal   | Cardiac arrythmia       |
| EMISNQCA1097  | cardiac pacing                                                   | Cardiac arrythmia       |
| EMISNQEC15    | ecg: corrected qt interval (qtc) abnormal                        | Cardiac arrythmia       |
| EMISNQEC16    | ecg: corrected qt interval (qtc) prolonged                       | Cardiac arrythmia       |
| EMISNQCA1102  | cardiac resynchronisation therapy defibrillator device in situ   | Cardiac arrythmia       |
| EMISNQ123     | 12 lead ecg abnormal                                             | Cardiac arrythmia       |
| ESCTAT2       | atrioventricular conduction disorder                             | Cardiac arrythmia       |
| G5739         | atypical atrial flutter                                          | Cardiac arrythmia       |
| 321C1         | ecg: sinus tachycardia                                           | Cardiac arrythmia       |
| ESCTMA2       | management of internal defibrillation                            | Cardiac arrythmia       |
| ^ESCTIN704652 | inappropriate sinus tachycardia                                  | Cardiac arrythmia       |
| HNG0017       | [rfc] heart block                                                | Cardiac arrythmia       |
| EMISCEX7      | excessively rapid heart rate                                     | Cardiac arrythmia       |
| ESCTOC3       | occlusive stroke                                                 | Cerebrovascular disease |
| EMISNQCE11    | cerebral venous thrombosis                                       | Cerebrovascular disease |
| EMISNQSU26    | suspected transient ischaemic attack                             | Cerebrovascular disease |

|             |                                                             |                          |
|-------------|-------------------------------------------------------------|--------------------------|
| EMISNQSU28  | suspected stroke                                            | Cerebrovascular disease  |
| EMISNQCE16  | cerebrovascular accident care plan                          | Cerebrovascular disease  |
| EMISNQTR28  | transient ischaemic attack monitoring                       | Cerebrovascular disease  |
| EMISNQCE29  | cerebrovascular disease monitoring default                  | Cerebrovascular disease  |
| TESTPCE1    | cerebrovascular disease management                          | Cerebrovascular disease  |
| EMISNQRE381 | referral by stroke nurse specialist                         | Cerebrovascular disease  |
| EMISNQTI19  | tia clinical management plan no longer in place             | Cerebrovascular disease  |
| Q4114       | intraventric (nontraumatic) haemorrhage grade 4 fet newborn | Cerebrovascular disease  |
| EMISNQRE602 | referral to stroke rehabilitation service                   | Cerebrovascular disease  |
| EMISNQRE623 | referral to community stroke service                        | Cerebrovascular disease  |
| EMISNQDI251 | discharge from community stroke service                     | Cerebrovascular disease  |
| HNG0234     | [rfc] stroke/cva                                            | Cerebrovascular disease  |
| HNG0235     | [rfc] stroke                                                | Cerebrovascular disease  |
| HNG0237     | [rfc] ischaemic attack                                      | Cerebrovascular disease  |
| HNG0602     | [rfc] stroke                                                | Cerebrovascular disease  |
| HNGP003     | [rfc] cva                                                   | Cerebrovascular disease  |
| EMISNQST2   | stroke monitoring invite 1                                  | Cerebrovascular disease  |
| EMISNQST3   | stroke monitoring invite 2                                  | Cerebrovascular disease  |
| EMISNQST4   | stroke monitoring invite 3                                  | Cerebrovascular disease  |
| EMISCPU4    | purpura                                                     | Coagulopathy             |
| EMISNQHE13  | heart failure lifestyle plan commenced                      | Congestive heart failure |
| EMISNQHE14  | heart failure information starter pack provided             | Congestive heart failure |
| EMISNQHE15  | heart failure monitoring - unstable symptoms                | Congestive heart failure |
| EMISNQHE16  | heart failure monitoring - specialist clinical needs        | Congestive heart failure |
| EMISNQHE17  | heart failure monitoring - social issues                    | Congestive heart failure |
| EMISNQHE18  | heart failure monitoring - psychological issues             | Congestive heart failure |
| EMISNQHE19  | heart failure monitoring - multiple readmissions            | Congestive heart failure |
| EMISNQHE20  | heart failure monitoring - co-medications                   | Congestive heart failure |
| EMISNQHE21  | heart failure monitoring - co-morbidities                   | Congestive heart failure |
| EMISNQHE22  | heart failure monitoring - palliative care                  | Congestive heart failure |
| EGTON2G6A1  | cause of death- congestive cardiac failure                  | Congestive heart failure |
| EMISNQHE42  | heart failure resolved                                      | Congestive heart failure |
| EMISNQEM10  | emergency heart failure admission since last appointment    | Congestive heart failure |
| EMISNQHE58  | heart failure pathway protocol not followed                 | Congestive heart failure |
| EMISNQHE70  | heart failure monitoring in primary care                    | Congestive heart failure |
| EMISNQHE71  | heart failure monitoring in secondary care                  | Congestive heart failure |
| EMISNQHE72  | heart failure monitoring default                            | Congestive heart failure |
| EMISNQSE142 | severe left ventricular systolic dysfunction                | Congestive heart failure |
| EMISHGT40   | echocardiogram shows lvh                                    | Congestive heart failure |
| EMISHGT41   | echocardiography - poor lv function                         | Congestive heart failure |
| EMISNQDI3   | diastolic dysfunction                                       | Congestive heart failure |
| EMISNQCO295 | copd gold group a                                           | COPD                     |
| EMISNQCO296 | copd gold group b                                           | COPD                     |
| EMISNQCO297 | copd gold group c                                           | COPD                     |
| EMISNQCO298 | copd gold group d                                           | COPD                     |
| EMISNQCL15  | clinical copd questionnaire                                 | COPD                     |



|             |                                                                           |                    |
|-------------|---------------------------------------------------------------------------|--------------------|
| EMISNQCH102 | chronic obstructive pulmonary disease confirmed                           | COPD               |
| EMISNQSE79  | seen in chronic obstructive pulmonary disease clinic                      | COPD               |
| EMISNQCH158 | chronic obstructive pulmonary disease monitoring in primary care          | COPD               |
| EMISNQCH159 | chronic obstructive pulmonary disease monitoring secondary care           | COPD               |
| EMISNQCH160 | chronic obstructive pulmonary disease severity                            | COPD               |
| EMISNQCH161 | chronic obstructive pulmonary disease monitoring default                  | COPD               |
| EMISNQCH162 | chronic obstructive pulmonary disease follow-up assessment                | COPD               |
| EMISNQSH45  | shared care chronic obstructive pulmonary disease monitoring              | COPD               |
| EMISNQ1C1   | 1 copd exacerbation in past year                                          | COPD               |
| EMISNQ3C1   | 3+ copd exacerbations in past year                                        | COPD               |
| EMISNQ2C1   | 2 copd exacerbations in past year                                         | COPD               |
| EMISNQNO109 | no copd exacerbations in past year                                        | COPD               |
| EMISNQAC842 | access to online patient copd education given                             | COPD               |
| EMISNQCO268 | copd assessment test score - cough                                        | COPD               |
| EMISNQCO269 | copd assessment test score - phlegm (mucus)                               | COPD               |
| EMISNQCO270 | copd assessment test score - chest tightness                              | COPD               |
| EMISNQCO271 | copd assessment test score - breathless walking up hill/stairs            | COPD               |
| EMISNQCO272 | copd assessment test score - activity limitation at home                  | COPD               |
| EMISNQCO273 | copd assessment test score - confidence leaving home                      | COPD               |
| EMISNQCO274 | copd assessment test score - sleeping soundly                             | COPD               |
| EMISNQCO275 | copd assessment test score - energy                                       | COPD               |
| EMISNQSU104 | suitable for step down change in copd management plan                     | COPD               |
| EMISNQAC878 | acute non-infective exacerbation of chronic obstructive pulmonary disease | COPD               |
| ESCTAC8     | acute infective exacerbation of chronic obstructive airways disease       | COPD               |
| EMISR4QCH1  | chronic bronchitis, acute exac                                            | COPD               |
| HNGNQRF16   | [rfc] chronic obstructive pulmonary disease (copd)                        | COPD               |
| EMISNQCO1   | copd medication review                                                    | COPD               |
| EMISNQCO3   | copd monitoring invite 1                                                  | COPD               |
| HNG0130     | [rfc] pernicious anaemia                                                  | Deficiency anaemia |
| HNG0131     | [rfc] iron deficiency anaemia                                             | Deficiency anaemia |
| ALLERGY6.1  | adverse reaction to drugs used in diabetes                                | Diabetes           |
| EMISNQRE56  | referral for diabetic retinopathy screening                               | Diabetes           |
| EMISNQIN21  | ineligibility for diabetic eye screening                                  | Diabetes           |
| EMISNQIN23  | ineligibility for diabetic eye screening: persistent dna                  | Diabetes           |
| EMISNQIN24  | ineligibility for diabetic eye screening: no contact details              | Diabetes           |
| EMISNQIN25  | ineligibility for diab. eye screening: declined to participate            | Diabetes           |
| EMISNQIN26  | ineligib for diab. eye screen: no longer categorised as diabetic          | Diabetes           |
| EMISNQIN28  | ineligibility for diabetic eye screening: under ophthalmic care           | Diabetes           |
| EMISNQIN29  | ineligibility for diabetic eye screening: deceased                        | Diabetes           |
| EMISNQIN30  | ineligibility for diabetic eye screening: moved away                      | Diabetes           |
| EMISNQNO16  | no evidence of diabetic peripheral neuropathy                             | Diabetes           |
| EMISNQIN33  | ineligibility for diabetic eye screening: physical disability             | Diabetes           |
| EMISNQIN35  | ineligibility for diabetic eye screening: terminal illness                | Diabetes           |
| EMISNQDE12  | declined referral to desmond diabet. structured educat programme          | Diabetes           |
| EMISNQDI36  | diabetic sick day rules advice                                            | Diabetes           |
| EMISNQNE23  | newly diagnosed diabetes                                                  | Diabetes           |

|              |                                                               |          |
|--------------|---------------------------------------------------------------|----------|
| EMISNQDI38   | diabetic dermopathy                                           | Diabetes |
| EMISNQRE174  | referred to diabetes service                                  | Diabetes |
| EMISNQRE216  | reason for referral: diabetes                                 | Diabetes |
| EMISNQDI70   | diabetic on non-insulin injectable                            | Diabetes |
| ESCTDI20     | diabetic ketoacidosis without coma                            | Diabetes |
| EMISNQDI80   | diabetic retinopathy screen done by optician                  | Diabetes |
| EMISNQDI94   | diabetes mellitus high risk review                            | Diabetes |
| EMISNQDI96   | diabetes mellitus confirmed                                   | Diabetes |
| EMISNQHO54   | home visit for diabetes monitoring                            | Diabetes |
| EMISNQDI101  | diabetic short review                                         | Diabetes |
| EMISNQDI106  | diabetic foot screening invitation letter                     | Diabetes |
| EMISNQDI111  | diabetic annual review by practice nurse                      | Diabetes |
| EMISNQRE335  | reason for influenza vaccine - diabetes mellitus              | Diabetes |
| EMISNQDI118  | diabetes monitoring in primary care                           | Diabetes |
| EMISNQDI119  | diabetes monitoring in secondary care                         | Diabetes |
| TESTPDI5     | diabetes treatment type                                       | Diabetes |
| EMISNQCA1013 | care contact service: diabetes                                | Diabetes |
| EMISNQDI129  | diabetic 3 month review                                       | Diabetes |
| EMISNQPA326  | participant in diabetes aerobic and resistance exercise study | Diabetes |
| EMISNQDI158  | diabetes care planning test results sent to patient           | Diabetes |
| EMISNQHO137  | h/o: hypoglycaemic event in diabetes                          | Diabetes |
| EMISNQNO149  | no h/o hypoglycaemic event in diabetes                        | Diabetes |
| EMISNQDI212  | diabetic foot examination - no action required                | Diabetes |
| 90LP         | x-pert first steps diabetes self-management programme complt  | Diabetes |
| L180B        | pre-existing type 2 diabetes mellitus in pregnancy            | Diabetes |
| EMISNQNE127  | new diabetic foot ulcer                                       | Diabetes |
| 9NIP1        | seen by diabetes specialist nurse                             | Diabetes |
| 9NN90        | under care of hospital-based diabetes specialist nurse        | Diabetes |
| 9NN91        | under care of community-based diabetes specialist nurse       | Diabetes |
| 9N6v         | referred by diabetes uk roadshow clinician                    | Diabetes |
| L180A        | pre-existing type 1 diabetes mellitus in pregnancy            | Diabetes |
| ESCTDI1      | discharge by diabetic liaison nurse                           | Diabetes |
| EMISHGT48    | diabetic - moderate control                                   | Diabetes |
| EMISHGT200   | diabetic foot risk assessment                                 | Diabetes |
| EMISHGT46    | emergency diabetic admission since last appointment           | Diabetes |
| EMISQDI1     | diabetic - gp eye check                                       | Diabetes |
| EMISQDI2     | diabetic - hospital eye check                                 | Diabetes |
| EMISQLA1     | laser treated diabetic retinopathy                            | Diabetes |
| EMISQLE11    | left laser treated diabetic retinopathy                       | Diabetes |
| EMISQLE13    | left advanced diabetic retinal disease                        | Diabetes |
| EMISQLE14    | left diabetic foot active ulceration                          | Diabetes |
| EMISQLE15    | left diabetic foot high risk                                  | Diabetes |
| EMISQLE16    | left diabetic foot moderate risk                              | Diabetes |
| EMISQLE17    | left diabetic foot low current risk                           | Diabetes |
| EMISTO1      | patient has been told has diabetes                            | Diabetes |
| EMISQLE8     | left non-proliferative diabetic retinopathy                   | Diabetes |

|              |                                                                 |                                 |
|--------------|-----------------------------------------------------------------|---------------------------------|
| EMISQRI10    | right proliferative diabetic retinopathy                        | Diabetes                        |
| EMISQRI11    | right laser treated diabetic retinopathy                        | Diabetes                        |
| EMISQRI12    | right diabetic maculopathy                                      | Diabetes                        |
| EMISQRI13    | right advanced diabetic retinal disease                         | Diabetes                        |
| EMISQRI14    | right diabetic foot active ulceration                           | Diabetes                        |
| EMISQRI15    | right diabetic foot high risk                                   | Diabetes                        |
| EMISQRI16    | right diabetic foot moderate risk                               | Diabetes                        |
| EMISQRI17    | right diabetic foot low current risk                            | Diabetes                        |
| EMISQRI8     | right non-proliferative diabetic retinopathy                    | Diabetes                        |
| EMISQRI9     | right preproliferative diabetic retinopathy                     | Diabetes                        |
| HNG0036      | [rfc] diabetes                                                  | Diabetes                        |
| HNG0167      | [rfc] diabetic foot/leg ulcer                                   | Diabetes                        |
| HNG0605      | [rfc] diabetes mellitus                                         | Diabetes                        |
| HNGNQRF66    | [rfc] diabetic health promotion                                 | Diabetes                        |
| HNGNQRF94    | [rfc] diabetic leg ulcer                                        | Diabetes                        |
| HNGNQRF95    | [rfc] diabetic foot ulcer                                       | Diabetes                        |
| PC0646       | pt advised re diabetic diet                                     | Diabetes                        |
| EMISNQS12    | six month diabetic review                                       | Diabetes                        |
| EMISCEL1     | electrolyte imbalance                                           | Fluid and electrolyte disorders |
| EMISNQHO13   | h/o: hiv                                                        | HIV/AIDS                        |
| H-SHHAPT     | [shhapt] hiv positive                                           | HIV/AIDS                        |
| H2-SHHAPT    | [shhapt] attendance for hiv related care                        | HIV/AIDS                        |
| EMISNQHI56   | hiv-1/hiv-2 antigen/antibody combination immunoassay positive   | HIV/AIDS                        |
| E3A-KC60     | aids - first presentation                                       | HIV/AIDS                        |
| E3B-KC60     | aids - subsequent presentation                                  | HIV/AIDS                        |
| E1A-KC60     | asymptomatic hiv infection - first presentation                 | HIV/AIDS                        |
| E1B-KC60     | asymptomatic hiv infection - subsequent presentation            | HIV/AIDS                        |
| E2A-KC60     | hiv infection with symptoms, not aids - first presentation      | HIV/AIDS                        |
| E2B-KC60     | hiv infection with symptoms, not aids - subsequent presentation | HIV/AIDS                        |
| EGTON41      | hiv infection                                                   | HIV/AIDS                        |
| HNG0143      | [rfc] hiv/aids                                                  | HIV/AIDS                        |
| PCNQAI2      | aids carrier                                                    | HIV/AIDS                        |
| ALLERGY2.5   | adverse reaction to antihypertensive drugs                      | Hypertension                    |
| ALLERGY2.5.1 | adverse reaction to vasodilator antihypertensive drugs          | Hypertension                    |
| EMISNQST24   | stage 1 hypertension                                            | Hypertension                    |
| EMISNQSE73   | severe hypertension                                             | Hypertension                    |
| EMISNQHY12   | hypertension confirmed                                          | Hypertension                    |
| EMISNQHY15   | hypertension monitoring in primary care                         | Hypertension                    |
| EMISNQHY16   | hypertension monitoring in secondary care                       | Hypertension                    |
| EMISNQHY19   | hypertension clinical management plan no longer in place        | Hypertension                    |
| EMISHGT69    | hypertension annual review                                      | Hypertension                    |
| EGTONHY3     | hypertensive clinic                                             | Hypertension                    |
| HNGZ016      | [rfc] hypertension                                              | Hypertension                    |
| EMISNQHY2    | hypertension medication review                                  | Hypertension                    |
| EMISNQSE16   | secondary hypothyroidism                                        | Hypothyroidism                  |
| EMISNQHY13   | hypothyroidism confirmed                                        | Hypothyroidism                  |

|                |                                                               |                        |
|----------------|---------------------------------------------------------------|------------------------|
| EMISNQHY20     | hypothyroidism clinical management plan no longer in place    | Hypothyroidism         |
| EMISNQHY1      | hypothyroidism medication review                              | Hypothyroidism         |
| EMISNQHY4      | hypothyroidism monitoring invite 1                            | Hypothyroidism         |
| EMISNQHY5      | hypothyroidism monitoring invite 2                            | Hypothyroidism         |
| EMISNQHY6      | hypothyroidism monitoring invite 3                            | Hypothyroidism         |
| EMISNQDN3      | dna - did not attend hypothyroidism clinic                    | Hypothyroidism         |
| EMISNQHE29     | hepatitis c pcr positive                                      | Liver disease          |
| EMISNQLI28     | liver disease due to cystic fibrosis                          | Liver disease          |
| C13-SHHAPT     | [shhapt] viral hepatitis b (hbsag positive) - first diagnosis | Liver disease          |
| C14-SHHAPT     | [shhapt] viral hepatitis c - first diagnosis                  | Liver disease          |
| C15-SHHAPT     | [shhapt] viral hepatitis a - acute infection                  | Liver disease          |
| EMISNQVI15     | viral hepatitis d                                             | Liver disease          |
| EMISNQRE332    | reason for influenza vaccine - chronic liver disease          | Liver disease          |
| EMISNQNO107    | non-alcoholic fatty liver disease (nafld) fibrosis score      | Liver disease          |
| EMISNQHE176    | hepatitis a total antibody test positive                      | Liver disease          |
| EMISNQHE178    | hepatitis b surface antibody test positive                    | Liver disease          |
| C14-KC60       | other viral hepatitis                                         | Liver disease          |
| C13-KC60       | antigen positive viral hepatitis b                            | Liver disease          |
| EMISHGT56      | fetor hepatis                                                 | Liver disease          |
| HNG0084        | [rfc] liver failure                                           | Liver disease          |
| HNG0090        | [rfc] cirrhosis                                               | Liver disease          |
| HNG0091        | [rfc] hepatitis                                               | Liver disease          |
| PCNQVI1        | viral hepatitis carrier                                       | Liver disease          |
| EMISNQHE6      | hepatitis c carrier                                           | Liver disease          |
| EMISNQHO3      | h/o: hepatitis b                                              | Liver disease          |
| EMISNQHE11     | hepatitis c positive                                          | Liver disease          |
| EGTON2EGTON433 | cause of death- myocardial infarction                         | Myocardial infarction  |
| EGTON2G41      | cause of death- acute myocardial infarction                   | Myocardial infarction  |
| EMISNQNO74     | no fh: myocardial infarction                                  | Myocardial infarction  |
| HNG0009        | [rfc] myocardial infarction (mi)                              | Myocardial infarction  |
| EMISR4QFI1     | first myocardial infarction                                   | Myocardial infarction  |
| EMISNQCA49     | cause of learning disabilities: congenital hydrocephalus      | Neurological disorders |
| ALLERGY4.8     | adverse reaction to antiepileptics                            | Neurological disorders |
| ALLERGY4.8.1   | adverse reaction to drugs used in control of epilepsy         | Neurological disorders |
| EMISNQEP4      | epilepsy treatment continued                                  | Neurological disorders |
| EMISNQHO38     | honos-ld item 13 - seizures                                   | Neurological disorders |
| EMISNQRE225    | reason for referral: epilepsy                                 | Neurological disorders |
| EMISNQRE248    | reason for referral: parkinsons disease                       | Neurological disorders |
| EMISNQVA13     | variant creutzfeldt-jakob disease                             | Neurological disorders |
| JHCHI32        | history of creutzfeldt-jakob disease                          | Neurological disorders |
| JHCHI33        | history of suspected creutzfeldt-jakob disease                | Neurological disorders |
| EMISNQEP19     | epilepsy monitoring administration                            | Neurological disorders |
| EMISNQEP20     | epilepsy monitoring in primary care                           | Neurological disorders |
| EMISNQEP21     | epilepsy monitoring in secondary care                         | Neurological disorders |
| EMISNQEP23     | epilepsy treatment compliance good                            | Neurological disorders |
| EMISNQEP24     | epilepsy treatment compliance poor                            | Neurological disorders |

|             |                                                              |                             |
|-------------|--------------------------------------------------------------|-----------------------------|
| EMISNQRE380 | referral by parkinsons disease nurse specialist              | Neurological disorders      |
| EMISNQRE383 | referral by multiple sclerosis nurse specialist              | Neurological disorders      |
| JHCH01      | h/o: seizures                                                | Neurological disorders      |
| EMISNQSE120 | seen by parkinson's service                                  | Neurological disorders      |
| EMISNQLI62  | lindop parkinson's assessment scale - gait mobility score    | Neurological disorders      |
| EMISNQLI69  | lindop parkinson's assessment scale - bed mobility score     | Neurological disorders      |
| 38VT        | amyotrophic lateral sclerosis functional rating scale - rvsd | Neurological disorders      |
| EMISNQCO292 | contraceptive advice for patients on valproate for epilepsy  | Neurological disorders      |
| 94F1        | sudep - sudden unexpected death in epilepsy                  | Neurological disorders      |
| Q48H        | acquired hydrocephalus of newborn                            | Neurological disorders      |
| F1740       | multiple system atrophy, cerebellar variant                  | Neurological disorders      |
| F1741       | multiple system atrophy, parkinson variant                   | Neurological disorders      |
| EMISR4QPA1  | partial epilepsy                                             | Neurological disorders      |
| EMISR4QSP2  | spinal demyelination                                         | Neurological disorders      |
| HNG0054     | [rfc] parkinson's disease                                    | Neurological disorders      |
| HNG0067     | [rfc] epilepsy/convulsion                                    | Neurological disorders      |
| HNG0603     | [rfc] multiple sclerosis                                     | Neurological disorders      |
| HNG0633     | [rfc] parkinson's disease                                    | Neurological disorders      |
| PC0037      | epilepsy monitoring                                          | Neurological disorders      |
| PC0676      | initial epilepsy assessment                                  | Neurological disorders      |
| PC0677      | follow-up epilepsy assessment                                | Neurological disorders      |
| EMISCTR3    | tremors/seizures                                             | Neurological disorders      |
| EMISNQAN3   | annual stroke/cva blood test                                 | Neurological disorders      |
| EMISNQMU8   | multiple sclerosis - personal health plan                    | Neurological disorders      |
| EMISNQMU11  | multiple sclerosis - primary progressive                     | Neurological disorders      |
| EMISNQMU12  | multiple sclerosis - secondary progressive                   | Neurological disorders      |
| EMISNQMU13  | multiple sclerosis - relapsing remitting                     | Neurological disorders      |
| EMISNQRE209 | reason for referral: cerebral palsy                          | Paralysis or paresis        |
| JHCAC3      | acute flaccid paralysis                                      | Paralysis or paresis        |
| EMISR4QSP1  | spastic paraparesis                                          | Paralysis or paresis        |
| HNG0180     | [rfc] cerebral palsy                                         | Paralysis or paresis        |
| HNG0197     | [rfc] cerebral palsy                                         | Paralysis or paresis        |
| HNG0086     | [rfc] peptic and duodenal ulcers                             | Peptic ulcer                |
| EMISNQPE9   | peripheral vascular disease annual review                    | Peripheral vascular disease |
| EMISNQPE10  | peripheral vascular disease monitoring administration        | Peripheral vascular disease |
| EMISNQPE11  | peripheral vascular disease monitoring first letter          | Peripheral vascular disease |
| EMISNQPE15  | percutaneous embolisation of bronchial artery                | Peripheral vascular disease |
| EMISNQIN59  | infrarenal abdominal aortic aneurysm                         | Peripheral vascular disease |
| EMISNQPE38  | peripheral arterial disease confirmed                        | Peripheral vascular disease |
| ESCTUP1     | upper limb ischaemia                                         | Peripheral vascular disease |
| G72yC       | vertebral artery aneurysm                                    | Peripheral vascular disease |
| HNG0015     | [rfc] arterio-sclerosis                                      | Peripheral vascular disease |
| HNG0025     | [rfc] aneurysms                                              | Peripheral vascular disease |
| HNG0028     | [rfc] arterial embolism of limbs                             | Peripheral vascular disease |
| HNG0169     | [rfc] arterial ulcer                                         | Peripheral vascular disease |
| HNG0172     | [rfc] peripheral vascular disease                            | Peripheral vascular disease |

|               |                                                                          |                                |
|---------------|--------------------------------------------------------------------------|--------------------------------|
| HNG0621       | [rfc] leg ulcer - arterial                                               | Peripheral vascular disease    |
| HNG0622       | [rfc] leg ulcer - both arterial & venous                                 | Peripheral vascular disease    |
| EMISNQAT9     | at risk of chronic kidney disease                                        | Renal disease                  |
| EMISNQCH107   | chronic kidney disease diagnosis discussed with patient                  | Renal disease                  |
| EMISNQRE331   | reason for influenza vaccine - chronic kidney disease                    | Renal disease                  |
| EMISNQPA337   | patient kidney care card given                                           | Renal disease                  |
| 14D8          | h/o: acute kidney injury                                                 | Renal disease                  |
| EMISNQCH956   | chronic kidney disease six monthly review                                | Renal disease                  |
| 8DE           | dialysis therapy started by renal service                                | Renal disease                  |
| 44yC1         | peritoneal dialysis fluid adenosine deaminase level                      | Renal disease                  |
| EGTON129      | non-functioning kidney                                                   | Renal disease                  |
| EGTON89       | chronic kidney rejection                                                 | Renal disease                  |
| HNG0107       | [rfc] continuous ambulatory peritoneal dialysis                          | Renal disease                  |
| HNG0111       | [rfc] renal transplant                                                   | Renal disease                  |
| EMISNQCH17    | chronic kidney disease stage                                             | Renal disease                  |
| EMISNQCH21    | chronic kidney disease stage 4                                           | Renal disease                  |
| ALLERGY10.1   | adverse reaction to drugs used in rheumatic diseases and gout            | Rheumatic and collagen disease |
| ALLERGY10.1.3 | adverse reaction to drugs which may affect the rheumatic disease process | Rheumatic and collagen disease |
| EMISNQS6      | systemic lupus erythematosus encephalitis                                | Rheumatic and collagen disease |
| EMISNQRE122   | remitting seronegative symmetrical synovitis with pitting oedema         | Rheumatic and collagen disease |
| EMISNQRH17    | rheumatoid arthritis monitoring invitation                               | Rheumatic and collagen disease |
| EMISNQRH20    | rheumatoid arthritis monitoring invitation first letter                  | Rheumatic and collagen disease |
| EMISNQRH21    | rheumatoid arthritis monitoring invitation second letter                 | Rheumatic and collagen disease |
| EMISNQRH22    | rheumatoid arthritis monitoring invitation third letter                  | Rheumatic and collagen disease |
| EMISNQRH23    | rheumatoid arthritis resolved                                            | Rheumatic and collagen disease |
| 38Vs          | rheumatoid arthritis impact of disease questionnaire                     | Rheumatic and collagen disease |
| EGTONSE2      | sero-negative polyarthritis                                              | Rheumatic and collagen disease |
| HNGP005       | [rfc] rheumatoid arthritis                                               | Rheumatic and collagen disease |
| EMISHGT105    | aortic valve opening restricted                                          | Valvular disease               |
| HNG0024       | [rfc] arterial stenosis                                                  | Valvular disease               |
